# Supplementary material for: Fecal microbiota transplantation mitigates bone loss by improving gut microbiome composition and gut barrier function in aged rats
Source: PeerJ. 2021 Oct 21;9:e12293. doi: 10.7717/peerj.12293 (PMC8542369; doi:10.7717/peerj.12293)
Supplement: Supplemental Information 1 [file peerj-09-12293-s001.xls]

## Sheet: BMD
Con	FMT	Don
0.1437	0.1521	0.1679
0.1522	0.1482	0.1632
0.1509	0.1524	0.1654
0.1507	0.1445	0.1621
0.156	0.1567
0.1426	0.1478

## Sheet: OC
Table format:Grouped	Group A						Group B
	Con						FMT
	A:1	A:2	A:3	A:4	A:5	A:6	B:1	B:2	B:3	B:4	B:5	B:6
0w	125.737	126.182	125.203	125.829	126.237	126.024	126.892	124.359	125.265	126.73	125.63	125.633
12w	125.158	127.808	126.318	128.723	131.629	128.288	125.265	124.602	125.205	126.762	125.628	126.628
24w	127.734	128.073	132.652	129.493			126.763	125.43	124.876	124.653

## Sheet: P1NP
Table format:Grouped	Group A						Group B
	Con						FMT
	A:1	A:2	A:3	A:4	A:5	A:6	B:1	B:2	B:3	B:4	B:5	B:6
0w	55.6351	45.6378	38.7633	42.739	33.3823	37.8722	37.7487	39.2471	46.658	47.7365	42.5633	39.7362
12w	37.2118	42.8871	55.2983	62.7638	49.6729	54.8722	49.7884	36.7672	27.7015	40.6382	38.7629	43.8729
24w	46.6282	64.6734	56.6336	53.6377			32.6739	39.8742	36.7268	43.7624

## Sheet: CTX
Table format:Grouped	Group A						Group B
	Con						FMT
	A:1	A:2	A:3	A:4	A:5	A:6	B:1	B:2	B:3	B:4	B:5	B:6
0w	286.322	336.14	317	378.673	327.094	297.871	276.333	366.14	319	358.77	349.962	354.871
12w	326.332	336.17	516.98	450.998	423.876	376.762	263.834	428.751	328.843	276.872	348.726	314.752
24w	434.763	478.563	518.672	372.783			245.647	325.736	434.753	367.824

## Sheet: BV
Table format:Grouped	Group A						Group B
	Con						FMT
	A:1	A:2	A:3	A:4	A:5	A:6	B:1	B:2	B:3	B:4	B:5	B:6
0w	2.629	1.8413	1.8732	2.0139	2.7321	1.6245	1.8324	1.9677	2.6741	2.1672	2.3481	1.9821
12w	2.0451	1.4529	1.2834	1.6722	1.8273	1.0142	2.7922	1.1604	0.8093	1.8321	1.2432	1.5271
24w	0.4575	0.5679	2.213	1.578			2.4932	1.8248	1.9493	1.8372

## Sheet: BV比TV
Table format:Grouped	Group A						Group B
	Con						FMT
	A:1	A:2	A:3	A:4	A:5	A:6	B:1	B:2	B:3	B:4	B:5	B:6
0w	17.6325	20.1716	16.1576	25.6632	19.6244	15.8757	15.6532	19.4325	24.8711	12.7602	17.4632	20.5534
12w	9.3627	10.3627	14.2141	13.5444	9.7227	12.9324	18.1517	10.3234	8.0708	13.6218	10.7762	12.5425
24w	3.9235	4.8722	13.08	14.3414			23.7211	14.9373	13.5446	15.5329

## Sheet: BS比BV
Table format:Grouped	Group A						Group B
	Con						FMT
	A:1	A:2	A:3	A:4	A:5	A:6	B:1	B:2	B:3	B:4	B:5	B:6
0w	38.3172	39.2769	40.821	39.4788	40.3291	41.8716	38.6712	39.7219	37.231	41.8329	42.7619	39.7731
12w	39.6721	40.2977	40.5182	42.4532	41.1259	43.9871	32.6231	49.0929	42.6156	47.6218	40.8711	35.8712
24w	46.993	43.467	40.8729	43.3572			31.2329	45.3629	41.5411	34.6172

## Sheet: Tb.N
Table format:Grouped	Group A						Group B
	Con						FMT
	A:1	A:2	A:3	A:4	A:5	A:6	B:1	B:2	B:3	B:4	B:5	B:6
0w	3.7672	3.6421	3.914	2.7655	1.9824	2.7633	2.987	3.8611	2.709	1.8766	2.3612	3.4252
12w	1.9122	1.8933	2.2971	1.0921	2.3017	1.2391	3.5951	2.5327	1.7199	1.0922	1.5724	2.1324
24w	0.9217	1.0583	1.542	2.1084			3.7041	3.3863	2.8128	3.6723

## Sheet: Tb.Th
Table format:Grouped	Group A						Group B
	Con						FMT
	A:1	A:2	A:3	A:4	A:5	A:6	B:1	B:2	B:3	B:4	B:5	B:6
0w	0.0512	0.0539	0.0592	0.0473	0.0521	0.0431	0.0452	0.0522	0.0517	0.0624	0.0472	0.0539
12w	0.0518	0.0428	0.0571	0.0414	0.0537	0.0562	0.0505	0.0407	0.0469	0.0521	0.0439	0.0561
24w	0.0426	0.046	0.0314	0.0461			0.064	0.0441	0.0481	0.0533

## Sheet: Tb.Sp
Table format:Grouped	Group A						Group B
	Con						FMT
	A:1	A:2	A:3	A:4	A:5	A:6	B:1	B:2	B:3	B:4	B:5	B:6
0w	0.3072	0.2513	0.3214	0.4396	0.2981	0.3343	0.2769	0.341	0.4129	0.3371	0.3081	0.3526
12w	0.5729	0.3502	0.4718	0.4807	0.3864	0.5371	0.2277	0.3541	0.5345	0.341	0.5271	0.4184
24w	1.0424	0.8989	0.3419	0.2756			0.2059	0.2512	0.3074
