# Supplementary material for: Fecal microbiota transplantation mitigates bone loss by improving gut microbiome composition and gut barrier function in aged rats
Source: PeerJ. 2021 Oct 21;9:e12293. doi: 10.7717/peerj.12293 (PMC8542369; doi:10.7717/peerj.12293)
Supplement: Supplemental Information 2 [file peerj-09-12293-s002.xlsx]

## Sheet: 1615772654698
experiment_id	sample_id	run_id	run_name	run_note	analysis_id	file_name	data_type	upload_type	file_path	base	security
OEX012577	OES076982	OER139825	9hospital-OP111_run	N/A	9hospital-OP111_2.fastq.gz	N/A	ftp	data/20210315/1615770494075.gz	N/A	Private
OEX012577	OES076982	OER139825	9hospital-OP111_run	N/A	9hospital-OP111_1.fastq.gz	N/A	ftp	data/20210315/1615770492871.gz	N/A	Private
OEX012577	OES076983	OER139824	9hospital-OP11_run	N/A	9hospital-OP11_2.fastq.gz	N/A	ftp	data/20210315/1615770496488.gz	N/A	Private
OEX012577	OES076984	OER139829	9hospital-OP16_run	N/A	9hospital-OP16_2.fastq.gz	N/A	ftp	data/20210315/1615770506217.gz	N/A	Private
OEX012577	OES076985	OER139827	9hospital-OP14_run	N/A	9hospital-OP14_1.fastq.gz	N/A	ftp	data/20210315/1615770500181.gz	N/A	Private
OEX012577	OES076986	OER139828	9hospital-OP15_run	N/A	9hospital-OP15_1.fastq.gz	N/A	ftp	data/20210315/1615770502579.gz	N/A	Private
OEX012577	OES076987	OER139831	9hospital-OP211_run	N/A	9hospital-OP211_1.fastq.gz	N/A	ftp	data/20210315/1615770507435.gz	N/A	Private
OEX012577	OES076987	OER139831	9hospital-OP211_run	N/A	9hospital-OP211_2.fastq.gz	N/A	ftp	data/20210315/1615770508685.gz	N/A	Private
OEX012577	OES076988	OER139832	9hospital-OP23_run	N/A	9hospital-OP23_2.fastq.gz	N/A	ftp	data/20210315/1615770513663.gz	N/A	Private
OEX012577	OES076989	OER139834	9hospital-OP25_run	N/A	9hospital-OP25_2.fastq.gz	N/A	ftp	data/20210315/1615770518607.gz	N/A	Private
OEX012577	OES076984	OER139829	9hospital-OP16_run	N/A	9hospital-OP16_1.fastq.gz	N/A	ftp	data/20210315/1615770504997.gz	N/A	Private
OEX012577	OES076990	OER139830	9hospital-OP21_run	N/A	9hospital-OP21_1.fastq.gz	N/A	ftp	data/20210315/1615770510055.gz	N/A	Private
OEX012577	OES076989	OER139834	9hospital-OP25_run	N/A	9hospital-OP25_1.fastq.gz	N/A	ftp	data/20210315/1615770517358.gz	N/A	Private
OEX012577	OES076991	OER139826	9hospital-OP13_run	N/A	9hospital-OP13_1.fastq.gz	N/A	ftp	data/20210315/1615770497729.gz	N/A	Private
OEX012577	OES076986	OER139828	9hospital-OP15_run	N/A	9hospital-OP15_2.fastq.gz	N/A	ftp	data/20210315/1615770503800.gz	N/A	Private
OEX012577	OES076983	OER139824	9hospital-OP11_run	N/A	9hospital-OP11_1.fastq.gz	N/A	ftp	data/20210315/1615770495277.gz	N/A	Private
OEX012577	OES076988	OER139832	9hospital-OP23_run	N/A	9hospital-OP23_1.fastq.gz	N/A	ftp	data/20210315/1615770512454.gz	N/A	Private
OEX012577	OES076992	OER139835	9hospital-OP26_run	N/A	9hospital-OP26_2.fastq.gz	N/A	ftp	data/20210315/1615770521048.gz	N/A	Private
OEX012577	OES076990	OER139830	9hospital-OP21_run	N/A	9hospital-OP21_2.fastq.gz	N/A	ftp	data/20210315/1615770511259.gz	N/A	Private
OEX012577	OES076993	OER139836	9hospital-OP35_run	N/A	9hospital-OP35_1.fastq.gz	N/A	ftp	data/20210315/1615770522264.gz	N/A	Private
OEX012577	OES076993	OER139836	9hospital-OP35_run	N/A	9hospital-OP35_2.fastq.gz	N/A	ftp	data/20210315/1615770523486.gz	N/A	Private
OEX012577	OES076994	OER139838	9hospital-OP37_run	N/A	9hospital-OP37_2.fastq.gz	N/A	ftp	data/20210315/1615770528361.gz	N/A	Private
OEX012577	OES076995	OER139837	9hospital-OP36_run	N/A	9hospital-OP36_2.fastq.gz	N/A	ftp	data/20210315/1615770525940.gz	N/A	Private
OEX012577	OES076996	OER139833	9hospital-OP24_run	N/A	9hospital-OP24_2.fastq.gz	N/A	ftp	data/20210315/1615770516150.gz	N/A	Private
OEX012577	OES076995	OER139837	9hospital-OP36_run	N/A	9hospital-OP36_1.fastq.gz	N/A	ftp	data/20210315/1615770524721.gz	N/A	Private
OEX012577	OES076997	OER139840	9hospital-OPC11_run	N/A	9hospital-OPC11_1.fastq.gz	N/A	ftp	data/20210315/1615770531986.gz	N/A	Private
OEX012577	OES076997	OER139840	9hospital-OPC11_run	N/A	9hospital-OPC11_2.fastq.gz	N/A	ftp	data/20210315/1615770533205.gz	N/A	Private
OEX012577	OES076998	OER139839	9hospital-OP38_run	N/A	9hospital-OP38_1.fastq.gz	N/A	ftp	data/20210315/1615770530781.gz	N/A	Private
OEX012577	OES076991	OER139826	9hospital-OP13_run	N/A	9hospital-OP13_2.fastq.gz	N/A	ftp	data/20210315/1615770498953.gz	N/A	Private
OEX012577	OES076999	OER139841	9hospital-OPC12_run	N/A	9hospital-OPC12_1.fastq.gz	N/A	ftp	data/20210315/1615770534408.gz	N/A	Private
OEX012577	OES077000	OER139842	9hospital-OPC13_run	N/A	9hospital-OPC13_1.fastq.gz	N/A	ftp	data/20210315/1615770536812.gz	N/A	Private
OEX012577	OES076999	OER139841	9hospital-OPC12_run	N/A	9hospital-OPC12_2.fastq.gz	N/A	ftp	data/20210315/1615770535613.gz	N/A	Private
OEX012577	OES077000	OER139842	9hospital-OPC13_run	N/A	9hospital-OPC13_2.fastq.gz	N/A	ftp	data/20210315/1615770538028.gz	N/A	Private
OEX012577	OES077001	OER139843	9hospital-OPC14_run	N/A	9hospital-OPC14_1.fastq.gz	N/A	ftp	data/20210315/1615770539233.gz	N/A	Private
OEX012577	OES076996	OER139833	9hospital-OP24_run	N/A	9hospital-OP24_1.fastq.gz	N/A	ftp	data/20210315/1615770514933.gz	N/A	Private
OEX012577	OES076992	OER139835	9hospital-OP26_run	N/A	9hospital-OP26_1.fastq.gz	N/A	ftp	data/20210315/1615770519831.gz	N/A	Private
OEX012577	OES077002	OER139844	9hospital-OPC15_run	N/A	9hospital-OPC15_2.fastq.gz	N/A	ftp	data/20210315/1615770542855.gz	N/A	Private
OEX012577	OES077003	OER139846	9hospital-OPC21_run	N/A	9hospital-OPC21_2.fastq.gz	N/A	ftp	data/20210315/1615770547642.gz	N/A	Private
OEX012577	OES076985	OER139827	9hospital-OP14_run	N/A	9hospital-OP14_2.fastq.gz	N/A	ftp	data/20210315/1615770501366.gz	N/A	Private
OEX012577	OES077003	OER139846	9hospital-OPC21_run	N/A	9hospital-OPC21_1.fastq.gz	N/A	ftp	data/20210315/1615770546435.gz	N/A	Private
OEX012577	OES077004	OER139847	9hospital-OPC22_run	N/A	9hospital-OPC22_2.fastq.gz	N/A	ftp	data/20210315/1615770550014.gz	N/A	Private
OEX012577	OES077005	OER139845	9hospital-OPC16_run	N/A	9hospital-OPC16_2.fastq.gz	N/A	ftp	data/20210315/1615770544048.gz	N/A	Private
OEX012577	OES076994	OER139838	9hospital-OP37_run	N/A	9hospital-OP37_1.fastq.gz	N/A	ftp	data/20210315/1615770527162.gz	N/A	Private
OEX012577	OES077002	OER139844	9hospital-OPC15_run	N/A	9hospital-OPC15_1.fastq.gz	N/A	ftp	data/20210315/1615770541661.gz	N/A	Private
OEX012577	OES077001	OER139843	9hospital-OPC14_run	N/A	9hospital-OPC14_2.fastq.gz	N/A	ftp	data/20210315/1615770540438.gz	N/A	Private
OEX012577	OES077004	OER139847	9hospital-OPC22_run	N/A	9hospital-OPC22_1.fastq.gz	N/A	ftp	data/20210315/1615770548828.gz	N/A	Private
OEX012577	OES076998	OER139839	9hospital-OP38_run	N/A	9hospital-OP38_2.fastq.gz	N/A	ftp	data/20210315/1615770529574.gz	N/A	Private
OEX012577	OES077006	OER139848	9hospital-OPC23_run	N/A	9hospital-OPC23_1.fastq.gz	N/A	ftp	data/20210315/1615770551202.gz	N/A	Private
OEX012577	OES077006	OER139848	9hospital-OPC23_run	N/A	9hospital-OPC23_2.fastq.gz	N/A	ftp	data/20210315/1615770552432.gz	N/A	Private
OEX012577	OES077005	OER139845	9hospital-OPC16_run	N/A	9hospital-OPC16_1.fastq.gz	N/A	ftp	data/20210315/1615770545244.gz	N/A	Private
OEX012577	OES077007	OER139849	9hospital-OPC24_run	N/A	9hospital-OPC24_1.fastq.gz	N/A	ftp	data/20210315/1615770759946.gz	N/A	Private
OEX012577	OES077007	OER139849	9hospital-OPC24_run	N/A	9hospital-OPC24_2.fastq.gz	N/A	ftp	data/20210315/1615770761118.gz	N/A	Private
OEX012577	OES077008	OER139850	9hospital-OPC25_run	N/A	9hospital-OPC25_1.fastq.gz	N/A	ftp	data/20210315/1615770762317.gz	N/A	Private
OEX012577	OES077008	OER139850	9hospital-OPC25_run	N/A	9hospital-OPC25_2.fastq.gz	N/A	ftp	data/20210315/1615770763534.gz	N/A	Private
OEX012577	OES077009	OER139851	9hospital-OPC26_run	N/A	9hospital-OPC26_1.fastq.gz	N/A	ftp	data/20210315/1615770764757.gz	N/A	Private
OEX012577	OES077010	OER139852	9hospital-OPC33_run	N/A	9hospital-OPC33_1.fastq.gz	N/A	ftp	data/20210315/1615770766030.gz	N/A	Private
OEX012577	OES077009	OER139851	9hospital-OPC26_run	N/A	9hospital-OPC26_2.fastq.gz	N/A	ftp	data/20210315/1615770767229.gz	N/A	Private
OEX012577	OES077010	OER139852	9hospital-OPC33_run	N/A	9hospital-OPC33_2.fastq.gz	N/A	ftp	data/20210315/1615770768430.gz	N/A	Private
OEX012577	OES077011	OER139853	9hospital-OPC34_run	N/A	9hospital-OPC34_1.fastq.gz	N/A	ftp	data/20210315/1615770769628.gz	N/A	Private
OEX012577	OES077011	OER139853	9hospital-OPC34_run	N/A	9hospital-OPC34_2.fastq.gz	N/A	ftp	data/20210315/1615770770831.gz	N/A	Private
OEX012577	OES077012	OER139854	9hospital-OPC35_run	N/A	9hospital-OPC35_1.fastq.gz	N/A	ftp	data/20210315/1615770772050.gz	N/A	Private
OEX012577	OES077013	OER139855	9hospital-OPC36_run	N/A	9hospital-OPC36_1.fastq.gz	N/A	ftp	data/20210315/1615770773266.gz	N/A	Private
OEX012577	OES077012	OER139854	9hospital-OPC35_run	N/A	9hospital-OPC35_2.fastq.gz	N/A	ftp	data/20210315/1615770774458.gz	N/A	Private
OEX012577	OES077013	OER139855	9hospital-OPC36_run	N/A	9hospital-OPC36_2.fastq.gz	N/A	ftp	data/20210315/1615770775678.gz	N/A	Private
