# Supplementary material for: Fecal microbiota transplantation mitigates bone loss by improving gut microbiome composition and gut barrier function in aged rats
Source: PeerJ. 2021 Oct 21;9:e12293. doi: 10.7717/peerj.12293 (PMC8542369; doi:10.7717/peerj.12293)
Supplement: Supplemental Information 3 [file peerj-09-12293-s003.xlsx]

## Sheet: statistics
Sample	rawdata	cleandata	Data volume for homogenization analysis	group
OP11	40369	32500	17497	FMT0w
OP111	31109	24897	17497	FMT0w
OP13	37527	29842	17497	FMT0w
OP14	55723	44851	17497	FMT0w
OP15	27851	22528	17497	FMT0w
OP16	77972	63045	17497	FMT0w
OP21	56068	44249	17497	FMT12w
OP211	96821	78360	17497	FMT12w
OP23	27749	22714	17497	FMT12w
OP24	53353	43010	17497	FMT12w
OP25	49280	40462	17497	FMT12w
OP26	53149	42192	17497	FMT12w
OP35	76681	58673	17497	FMT24w
OP36	47201	37301	17497	FMT24w
OP37	84543	67501	17497	FMT24w
OP38	38790	31004	17497	FMT24w
OPC11	77536	63218	17497	Con0w
OPC12	60169	49152	17497	Con0w
OPC13	127147	65160	17497	Con0w
OPC14	27177	21972	17497	Con0w
OPC15	255637	127790	17497	Con0w
OPC16	79681	40429	17497	Con0w
OPC21	98710	79073	17497	Con12w
OPC22	40629	32198	17497	Con12w
OPC23	245167	126413	17497	Con12w
OPC24	61982	50572	17497	Con12w
OPC25	70463	35404	17497	Con12w
OPC26	252216	127519	17497	Con12w
OPC33	80566	61020	17497	Con24w
OPC34	46167	23222	17497	Con24w
OPC35	68992	34859	17497	Con24w
OPC36	75617	59517	17497	Con24w

## Sheet: alpha-diversity
Sample	cutoff	OTUs	ACE	Chao	Shannon	Simpson	Coverage	shannoneven	simpsoneven
OP11	0.03	869	2171.44	1566.39	4.71228	0.02525	0.977082	0.696326	0.045574
OP111	0.03	1165	2473.82	2040.01	5.42928	0.011612	0.971481	0.768967	0.073919
OP13	0.03	882	2036.95	1785.04	4.83577	0.022932	0.97771	0.713009	0.049442
OP14	0.03	946	2726.56	1892.23	4.56043	0.036792	0.97251	0.665538	0.028731
OP15	0.03	1427	4357.14	3192.93	5.52976	0.01217	0.957821	0.761326	0.057584
OP16	0.03	1195	3388.76	2589.76	5.3757	0.011157	0.966223	0.758648	0.075006
OP21	0.03	981	2705.73	2229.94	4.99845	0.016489	0.973024	0.725615	0.06182
OP211	0.03	1108	3225.7	2359.05	5.06139	0.022529	0.968395	0.721992	0.040061
OP23	0.03	912	2216.96	1659.3	4.84398	0.022735	0.975767	0.710715	0.04823
OP24	0.03	1255	3936.94	2905.02	5.30743	0.012147	0.962108	0.743869	0.065597
OP25	0.03	1056	2702.7	2108.11	5.12153	0.015486	0.971252	0.735614	0.061149
OP26	0.03	873	2807.19	1988.11	4.75603	0.018656	0.974224	0.702315	0.0614
OP35	0.03	1057	3544	2482.25	4.71158	0.033272	0.967823	0.676641	0.028435
OP36	0.03	1194	5463.98	3508.01	4.88892	0.023293	0.959193	0.690031	0.035956
OP37	0.03	858	4179.94	2670.39	3.23402	0.123285	0.969195	0.478787	0.009454
OP38	0.03	871	3813.02	2381.33	4.64501	0.023089	0.972052	0.686153	0.049726
OPC11	0.03	804	2423.87	1795.24	4.36696	0.033932	0.97651	0.652799	0.036655
OPC12	0.03	921	3026.18	2093.57	4.11495	0.050491	0.970681	0.602883	0.021504
OPC13	0.03	762	1731.87	1465.5	4.49492	0.032537	0.980797	0.677359	0.040334
OPC14	0.03	910	2777.98	2129.63	5.03964	0.015099	0.974567	0.739661	0.072778
OPC15	0.03	1008	2692.67	2145.12	5.22229	0.012126	0.972852	0.755132	0.08181
OPC16	0.03	970	2512.8	1841.16	4.96176	0.020337	0.974167	0.72147	0.050693
OPC21	0.03	822	2560.23	1726.73	4.54432	0.025125	0.975539	0.67707	0.048419
OPC22	0.03	951	2461.3	1922.39	4.84562	0.027662	0.974281	0.706614	0.038014
OPC23	0.03	1002	2532.91	2091.7	5.16592	0.013451	0.973424	0.747627	0.074198
OPC24	0.03	977	2722.19	2060.74	4.67145	0.031859	0.971938	0.678547	0.032127
OPC25	0.03	947	2772.41	2084.8	4.88892	0.019012	0.973538	0.713367	0.055543
OPC26	0.03	1033	2640.04	2223.16	5.32608	0.011141	0.973081	0.767422	0.08689
OPC33	0.03	1163	5158.73	3801.88	5.05516	0.016855	0.961022	0.716155	0.051015
OPC34	0.03	1050	2949	2241.07	5.33606	0.010374	0.971252	0.767057	0.091801
OPC35	0.03	948	2195.79	1990.51	5.27151	0.011163	0.976053	0.769075	0.094496
OPC36	0.03	1089	3820.82	2436.77	4.8211	0.021321	0.96588	0.689417	0.043068

## Sheet: 0.03-OTU
OTU number	taxonomy	phylum	class	order	family	genus	所有样品总和百分比	Representative_Sequence	OP1	OP2	OP3	OPC1	OPC2	OPC3	OP11	OP111	OP13	OP14	OP15	OP16	OP21	OP211	OP23	OP24	OP25	OP26	OP35	OP36	OP37	OP38	OPC11	OPC12	OPC13	OPC14	OPC15	OPC16	OPC21	OPC22	OPC23	OPC24	OPC25	OPC26	OPC33	OPC34	OPC35	OPC36
Otu00001	Bacteria;Bacteroidetes;Bacteroidia;Bacteroidales;Porphyromonadaceae;unclassified_Porphyromonadaceae	Bacteroidetes	Bacteroidia	Bacteroidales	Porphyromonadaceae	unclassified_Porphyromonadaceae	0.036321	M06047_81_000000000CBLT5_1_2110_13662_4910	0.0559143	0.0112591	0.00234326	0.0241375	0.0288716	0.0192462	0.0629251	0.0662399	0.0867006	0.0356633	0.0710979	0.0128593	0.0193176	0.00428645	0.0147454	0.0124593	0.007487	0.00925873	0.00165743	0.00445791	0.00114305	0.00211465	0.00160027	0.00114305	0.0825856	0.00405784	0.043436	0.0120021	0.0064011	0.0175459	0.0547522	0.00440075	0.0597817	0.0303481	0.00354346	0.0391496	0.0242899	0.0100017
Otu00002	Bacteria;Bacteroidetes;Bacteroidia;Bacteroidales;Porphyromonadaceae;unclassified_Porphyromonadaceae	Bacteroidetes	Bacteroidia	Bacteroidales	Porphyromonadaceae	unclassified_Porphyromonadaceae	0.026625	M06047_81_000000000CBLT5_1_2115_22046_8312	0.0259568	0.0100398	0.00684403	0.0474367	0.0153169	0.0183317	0.019832	0.027719	0.044179	0.0177173	0.0237755	0.0225181	0.00971595	0.00605818	0.0179459	0.00834429	0.0125736	0.00560096	0.00931588	0.0096588	0.000742985	0.00765846	0.0354918	0.0303481	0.0849288	0.0206893	0.0322341	0.0809282	0.0010859	0.00691547	0.0330914	0.00617249	0.0254901	0.0191461	0.0191461	0.0237184	0.0228611	0.0076013
Otu00003	Bacteria;Firmicutes;Bacilli;Lactobacillales;Lactobacillaceae;Lactobacillus	Firmicutes	Bacilli	Lactobacillales	Lactobacillaceae	Lactobacillus	0.0216999	M06047_81_000000000CBLT5_1_1106_15362_21832	0.039502	0.00836334	0.0317054	0.0143072	0.00956354	0.0265903	0.0621249	0.00960165	0.0160027	0.133966	0.0103446	0.00497228	0.00994456	0.00245756	0.0129165	0.0112591	0.00502943	0.0085729	0.0175459	0.0118306	0.0897868	0.00765846	0.0310339	0.0400069	0.0020575	0.00863005	0.0031434	0.000971595	0.00680117	0.0269189	0.00262902	0.0184032	0.00114305	0.00148597	0.0279476	0.0021718	0.00251472	0.0737269
Otu00004	Bacteria;Bacteroidetes;Bacteroidia;Bacteroidales;Prevotellaceae;Prevotella	Bacteroidetes	Bacteroidia	Bacteroidales	Prevotellaceae	Prevotella	0.0177536	M06047_81_000000000CBLT5_1_2105_26987_13412	0.0460555	0.00710598	0.00221467	0.0231945	0.0114591	0.0130737	0.0956735	0.0248614	0.0511516	0.0903583	0.0124593	0.00182888	0.0138309	0.00520089	0.00502943	0.00674401	0.00765846	0.00417214	0.000685832	0.0021718	0.00171458	0.00428645	0.00331485	0.00182888	0.0152026	0.0261188	0.0201749	0.0725267	0.0054295	0.0115448	0.020575	0.00245756	0.0165171	0.0122307	0.00794422	0.0289192	0.00782991	0.0076013
Otu00005	Bacteria;Bacteroidetes;Bacteroidia;Bacteroidales;Bacteroidaceae;Bacteroides	Bacteroidetes	Bacteroidia	Bacteroidales	Bacteroidaceae	Bacteroides	0.0167902	M06047_81_000000000CBLT5_1_2112_14872_20519	0.0117353	0.0148311	0.0403784	0.0116687	0.0208226	0.0156313	0.0134309	0.00611533	0.0181745	0.0114877	0.00897297	0.0122307	0.00822998	0.00634394	0.0118306	0.00702978	0.0101732	0.0453792	0.00417214	0.0761845	0.0116591	0.0694976	0.0192604	0.0240613	0.00937304	0.00560096	0.00680117	0.00491513	0.0101732	0.00474367	0.00777276	0.0705835	0.017603	0.0140596	0.0148597	0.00262902	0.0200606	0.0249757
Otu00006	Bacteria;Proteobacteria;Epsilonproteobacteria;Campylobacterales;Helicobacteraceae;Helicobacter	Proteobacteria	Epsilonproteobacteria	Campylobacterales	Helicobacteraceae	Helicobacter	0.0150629	M06047_81_000000000CBLT5_1_1102_19442_9805	0.0224324	0.009735	0.00782991	0.00741079	0.0114782	0.0215037	0.00845859	0.0182317	0.0528091	0.0042293	0.0293765	0.0214894	0.0107447	0.0289192	0.00302909	0.00331485	0.00411499	0.00828713	0.00742985	0.0064011	0.0131451	0.0043436	0.00337201	0.00588672	0.0020575	0.00394353	0.020575	0.00863005	0.00102875	0.0105161	0.0196034	0.00371492	0.0220609	0.0119449	0.0241756	0.030691	0.0176602	0.013488
Otu00007	Bacteria;Bacteroidetes;Bacteroidia;Bacteroidales;Porphyromonadaceae;unclassified_Porphyromonadaceae	Bacteroidetes	Bacteroidia	Bacteroidales	Porphyromonadaceae	unclassified_Porphyromonadaceae	0.0145395	C70117_71_000000000C45C2_1_1114_12757_15717	0.000219085	0.000171458	0.00810139	0.000323865	0.000581052	0.00302909	0.000742985	0.000285763	0	0	0.000228611	5.71527e-05	0	0	0	0.000114305	0.00085729	5.71527e-05	0.00754415	0.00234326	0.0214322	0.0010859	0	0	0.00137166	0	0.000228611	0.000342916	5.71527e-05	0	0.000971595	0.000628679	0.000571527	0.00125736	0.00182888	0.000800137	0.000685832	0.00880151
Otu00008	Bacteria;Firmicutes;Bacilli;Lactobacillales;Lactobacillaceae;Lactobacillus	Firmicutes	Bacilli	Lactobacillales	Lactobacillaceae	Lactobacillus	0.0143943	M06047_81_000000000CBLT5_1_2112_20444_14574	0.00847764	0.0126022	0.00524376	0.00129546	0.00188604	0.0138452	0.00200034	0.012745	0.0179459	0.00817283	0.00617249	0.00382923	0.036692	0.00382923	0.0160027	0.0126307	0.00285763	0.00360062	0.0096588	0.00811568	0.00114305	0.0020575	0.000685832	0.00171458	0.000971595	0.00320055	0.000514374	0.000685832	0.00171458	0.00440075	0.000400069	0.00382923	0.000114305	0.00085729	0.00440075	0.00120021	0.000114305	0.0496657
Otu00009	Bacteria;Firmicutes;Clostridia;Clostridiales;Clostridiaceae 1;Clostridium sensu stricto	Firmicutes	Clostridia	Clostridiales	Clostridiaceae 1	Clostridium sensu stricto	0.0139879	M06047_81_000000000CBLT5_1_2113_19170_8420	0.00282906	0.0172125	0.0338772	0.0600103	0.00612486	0.0154026	0.00200034	0.0032577	0.000114305	0.000114305	0.0110876	0.000400069	0.0210322	0.0357776	0.0251472	0.0167457	0.00245756	0.00211465	0.0602389	0.00742985	0.0586958	0.00914442	0.101617	0.153626	0.0856718	0.000171458	0.000457221	0.0185175	0.0113734	0.0244613	5.71527e-05	0.000285763	0.000571527	0	0.0231468	5.71527e-05	0	0.0384066
Otu00010	Bacteria;Bacteroidetes;Bacteroidia;Bacteroidales;Porphyromonadaceae;unclassified_Porphyromonadaceae	Bacteroidetes	Bacteroidia	Bacteroidales	Porphyromonadaceae	unclassified_Porphyromonadaceae	0.0131043	M06047_81_000000000CBLT5_1_1110_27900_10250	0.0153836	0.0189175	0.0029005	0.00675354	0.00848717	0.0242899	0.0104589	0.0160027	0.00394353	0.0064011	0.0303481	0.0251472	0.0279476	0.035949	0.0290907	0.013488	0.00388638	0.0031434	0.00742985	0.00154312	0.00137166	0.00125736	0.00085729	0.00125736	0.015717	0.00474367	0.00240041	0.0155455	0.00302909	0.0265188	0.00320055	0.00211465	0.0141739	0.00188604	0.0717837	0.00291479	0.00171458	0.0207464
Otu00011	Bacteria;Firmicutes;Clostridia;Clostridiales;Peptostreptococcaceae;Romboutsia	Firmicutes	Clostridia	Clostridiales	Peptostreptococcaceae	Romboutsia	0.0128466	M06047_81_000000000CBLT5_1_1109_3011_12186	0.0163266	0.018727	0.0106304	0.0250424	0.0076013	0.0168315	0.00742985	0.00805852	0.0323484	0.0136023	0.0188032	0.0177173	0.0454364	0.00954449	0.0255472	0.0253186	0.00365777	0.00285763	0.00885866	0.00320055	0.0147454	0.015717	0.0414357	0.0439504	0.0200606	0.0149168	0.00514374	0.0247471	0.0043436	0.00948734	0.00565811	0.00680117	0.00274333	0.0165743	0.00971595	0.0180031	0.00845859	0.0311482
Otu00012	Bacteria;Firmicutes;Clostridia;Clostridiales;Lachnospiraceae;unclassified_Lachnospiraceae	Firmicutes	Clostridia	Clostridiales	Lachnospiraceae	unclassified_Lachnospiraceae	0.0124829	C70117_71_000000000C45C2_1_1109_22278_5897	0.000371492	0.00774418	0.0169172	0.000257187	0.0146978	0.00865863	0.000571527	0.00120021	0.000114305	0	0.000285763	5.71527e-05	0.00125736	0.000800137	0.00125736	0.00171458	0.0010859	0.0403498	0.00120021	0.00274333	0.0596674	0.00405784	0.000685832	0.000228611	0	0.000628679	0	0	0.0504658	0.0370921	0	0.000628679	0	0	0.00388638	0	0	0.0307481
Otu00013	Bacteria;Firmicutes;Clostridia;Clostridiales;Lachnospiraceae;Clostridium XlVa	Firmicutes	Clostridia	Clostridiales	Lachnospiraceae	Clostridium XlVa	0.00969599	M06047_81_000000000CBLT5_1_2116_18312_14291	0.00929683	0.0167743	0.00431503	0.00597245	0.0162028	0.00425787	0.0228039	0.00897297	0.00365777	0.00120021	0.0150311	0.00411499	0.00194319	0.0169743	0.00514374	0.0405784	0.0114877	0.0245185	0.00245756	0.0104018	0.000342916	0.00405784	0.000285763	0.0010859	0.000914442	0.00794422	0.00691547	0.0186889	0.0570383	0.014974	0.00845859	0.0106304	0.0010859	0.00502943	0.00508659	0.00371492	0.00594388	0.00228611
Otu00014	Bacteria;Firmicutes;Erysipelotrichia;Erysipelotrichales;Erysipelotrichaceae;Turicibacter	Firmicutes	Erysipelotrichia	Erysipelotrichales	Erysipelotrichaceae	Turicibacter	0.00967785	M06047_81_000000000CBLT5_1_2116_28776_15040	0.0363396	0.0106304	0.00855861	0.0163647	0.00456269	0.0045865	0.00502943	0.0193747	0.0525233	0.0624107	0.0244613	0.0542379	0.0193176	0.00674401	0.0160599	0.0170315	0.00262902	0.00200034	0.0206321	0.00182888	0.00280048	0.00897297	0.0255472	0.0244613	0.0117163	0.0267474	0.00137166	0.00834429	0.00171458	0.0043436	0.00245756	0.0100589	0.0021718	0.00662971	0.0031434	0.00891581	0.00291479	0.00337201
Otu00015	Bacteria;Firmicutes;Clostridia;Clostridiales;Ruminococcaceae;unclassified_Ruminococcaceae	Firmicutes	Clostridia	Clostridiales	Ruminococcaceae	unclassified_Ruminococcaceae	0.00956536	C70117_71_000000000C45C2_1_1102_17129_19281	0.00409594	0.0357014	0.0488084	0.00185746	0.00315292	0.00297194	0.0109162	0.00560096	0.000228611	5.71527e-05	0.00348631	0.00428645	0.00417214	0.115334	0.0053152	0.00680117	0.0728125	0.0097731	0.138252	0.00165743	0.00171458	0.0536092	0.000285763	0.000457221	0.000285763	0.000228611	0.00943019	0.000457221	0.000914442	0.0065154	0.00983026	0.000742985	0.000457221	0.000457221	0.0107447	0.000171458	0.000342916	0.000628679
Otu00016	Bacteria;Firmicutes;unclassified_Firmicutes;;;	Firmicutes	unclassified_Firmicutes				0.00950639	M06047_81_000000000CBLT5_1_1102_25770_3553	0.0119354	0.0140119	0.00907298	0.00671544	0.0118592	0.00671544	0.0106304	0.00863005	0.0137738	0.0197177	0.00960165	0.00925873	0.011602	0.024347	0.0176602	0.0109733	0.00943019	0.0100589	0.0170315	0.00845859	0.00451506	0.00628679	0.00382923	0.000800137	0.000228611	0.0148025	0.0199463	0.000685832	0.0129737	0.0172029	0.0237184	0.00983026	0.00114305	0.00628679	0.0107447	0.00662971	0.00297194	0.0065154
Otu00017	Bacteria;Bacteroidetes;Bacteroidia;Bacteroidales;Porphyromonadaceae;unclassified_Porphyromonadaceae	Bacteroidetes	Bacteroidia	Bacteroidales	Porphyromonadaceae	unclassified_Porphyromonadaceae	0.00930681	C70117_71_000000000C45C2_1_2106_16221_13202	0.0049056	0.0320912	0.0162314	0.0143834	0.00757273	0.0187746	0.0020575	0.00382923	0.0107447	0.00948734	0.00194319	0.00137166	0.0544093	0.0211465	0.0705835	0.0204607	0.00577242	0.0201749	0.0407498	0.012745	0.0042293	0.00720123	0.00320055	0.000400069	0.038578	0.0302909	0.0096588	0.00417214	0.00102875	0.0282334	0.0085729	0.00565811	0.00160027	0.000342916	0.0546379	0.00148597	0.000285763	0.0186889
Otu00018	Bacteria;Firmicutes;Clostridia;Clostridiales;Lachnospiraceae;unclassified_Lachnospiraceae	Firmicutes	Clostridia	Clostridiales	Lachnospiraceae	unclassified_Lachnospiraceae	0.0091163	M06047_81_000000000CBLT5_1_1101_16445_7819	0.0127641	0.00904917	0.000971595	0.00400069	0.0114782	0.00968737	0.0177173	0.0216037	0.00194319	0.00600103	0.00445791	0.0248614	0.00874436	0.00165743	0.00497228	0.0348631	0.00280048	0.00125736	0.00148597	0.00102875	0.00102875	0.000342916	0.000228611	0.000628679	0.000514374	0.00771561	0.0135452	0.00137166	0.000514374	0.00497228	0.0104018	0.00245756	0.0461222	0.00440075	0.00925873	0.0144596	0.0132023	0.00182888
Otu00019	Bacteria;Bacteroidetes;Bacteroidia;Bacteroidales;Porphyromonadaceae;unclassified_Porphyromonadaceae	Bacteroidetes	Bacteroidia	Bacteroidales	Porphyromonadaceae	unclassified_Porphyromonadaceae	0.00903466	M01394_160_000000000C9RJW_1_2112_6102_6886	0.0092492	0.00411499	0.00154312	0.00592483	0.00441028	0.00694405	0.0145739	0.00462937	0.0132594	0.0131451	0.0064011	0.00348631	0.00520089	0.00731554	0.00548665	0.00240041	0.00268617	0.00160027	0.00245756	0.00182888	0.00114305	0.000742985	0.000285763	5.71527e-05	0.0103446	0.00131451	0.0010859	0.022461	0.00120021	0.00474367	0.00154312	0.000971595	0.0162314	0.00177173	0.0124593	0.000685832	0.00382923	0.0108019
Otu00020	Bacteria;Bacteroidetes;Bacteroidia;Bacteroidales;Porphyromonadaceae;unclassified_Porphyromonadaceae	Bacteroidetes	Bacteroidia	Bacteroidales	Porphyromonadaceae	unclassified_Porphyromonadaceae	0.00868176	M06047_81_000000000CBLT5_1_1111_12864_10518	0.00832524	0.00557238	0.00488655	0.00180031	0.00257187	0.00341487	0.00508659	0.0112019	0.00834429	0.0131451	0.00628679	0.00588672	0.00777276	0.00622964	0.0122878	0.00405784	0.00285763	0.000228611	0.0182317	0.000457221	0.000628679	0.000228611	0.000171458	0.000114305	0.000228611	0.0020575	0.00805852	0.000171458	0	0.00394353	0.0105161	0.000457221	0.000228611	0.000285763	0.00262902	0.00908727	0.000914442	0.00102875
Otu00021	Bacteria;Firmicutes;Clostridia;Clostridiales;Ruminococcaceae;Ruminococcus	Firmicutes	Clostridia	Clostridiales	Ruminococcaceae	Ruminococcus	0.00837422	M06047_81_000000000CBLT5_1_2114_23504_14886	0.0026576	0.0149264	0.00805852	0.0156789	0.0107828	0.0103589	0.00462937	0.00171458	0.00445791	5.71527e-05	0.00285763	0.00222895	0.0198891	0.00228611	0.0237184	0.00908727	0.0222324	0.012345	0.000685832	0.0128022	0.00120021	0.0175459	0	5.71527e-05	0.0270904	0.00622964	0.0272047	0.0334915	0.00571527	0.00131451	0.0386352	0.010116	0.00502943	0.00388638	0.0206321	0.010859	0.00771561	0.00222895
Otu00022	Bacteria;Bacteroidetes;Bacteroidia;Bacteroidales;Bacteroidaceae;Bacteroides	Bacteroidetes	Bacteroidia	Bacteroidales	Bacteroidaceae	Bacteroides	0.00831616	M06047_81_000000000CBLT5_1_1110_6871_3077	0.00229563	0.00509611	0.069369	0.00697262	0.00674401	0.00134309	0.00262902	0.00417214	0.0010859	0.000628679	0.00382923	0.00142882	0.00085729	0.00377208	0.00268617	0.0010859	0.00634394	0.0158313	0.00171458	0.00685832	0.261645	0.00725839	0.0150883	0.00994456	0.00828713	0.00691547	0.000514374	0.0010859	0.0302338	0.00262902	0.000342916	0.00680117	0.000285763	0.000171458	0.00114305	0.00131451	0	0.00291479
Otu00023	Bacteria;Firmicutes;Clostridia;Clostridiales;Lachnospiraceae;unclassified_Lachnospiraceae	Firmicutes	Clostridia	Clostridiales	Lachnospiraceae	unclassified_Lachnospiraceae	0.00821275	M03062_107_000000000CBKND_1_2111_9891_21664	0.00676306	0.00405784	0.000928731	0.00633442	0.00554381	0.0111591	0.00462937	0.0103446	0.00360062	0.0010859	0.00845859	0.0124593	0.00828713	0.00491513	0.00137166	0.00462937	0.00160027	0.00354346	0.00251472	0.000171458	0.000628679	0.000400069	0.00291479	0.00320055	0.00394353	0.0154312	0.00622964	0.00628679	0.000685832	0.00188604	0.00731554	0.000742985	0.0140024	0.00863005	0.0021718	0.0213179	0.0178316	0.00331485
Otu00024	Bacteria;Firmicutes;Clostridia;Clostridiales;Ruminococcaceae;Flavonifractor	Firmicutes	Clostridia	Clostridiales	Ruminococcaceae	Flavonifractor	0.00810298	M06047_81_000000000CBLT5_1_2113_7071_22075	0.00912537	0.0042293	0.00430074	0.00983026	0.0153074	0.0127736	0.0054295	0.0121164	0.00954449	0.00142882	0.0122307	0.0140024	0.00708693	0.00400069	0.00234326	0.00234326	0.00411499	0.00548665	0.00388638	0.00348631	0.00302909	0.00680117	0.0032577	0.00165743	0.00680117	0.00702978	0.0207464	0.0194891	0.00645825	0.0054295	0.0173173	0.00320055	0.0247471	0.0346917	0.00822998	0.0200034	0.0187461	0.00411499
Otu00025	Bacteria;Firmicutes;Clostridia;Clostridiales;Lachnospiraceae;unclassified_Lachnospiraceae	Firmicutes	Clostridia	Clostridiales	Lachnospiraceae	unclassified_Lachnospiraceae	0.00793605	M06047_81_000000000CBLT5_1_2111_18286_14872	0.0036673	0.0105447	0.000528662	0.00212417	0.00644872	0.00698691	0.010859	0.000571527	0.000400069	0.000628679	0.000514374	0.00903012	0.0409213	0.0174316	0.000914442	0.00142882	0.000742985	0.00182888	0.000228611	0.0010859	0.000285763	0.000514374	0.000171458	0.000457221	0.00188604	0.00228611	0.0020575	0.00588672	0.0177745	0.0053152	0.00200034	0.00125736	0.000628679	0.0117163	0.000228611	0.00171458	0.00251472	0.0234897
Otu00026	Bacteria;Firmicutes;Clostridia;Clostridiales;unclassified_Clostridiales;	Firmicutes	Clostridia	Clostridiales	unclassified_Clostridiales		0.00792335	M06047_81_000000000CBLT5_1_2101_27588_18805	0.00630584	0.00553428	0.00787278	0.0036673	0.00533425	0.00397211	0.00360062	0.0054295	0.00308624	0.00863005	0.00794422	0.00914442	0.00280048	0.00554381	0.00731554	0.00925873	0.00725839	0.00102875	0.028462	0.00114305	0.000742985	0.00114305	0.000285763	0.000342916	0.00200034	0.0031434	0.0150883	0.00114305	0.000400069	0.00274333	0.0181174	0.00137166	0.00554381	0.00382923	0.00720123	0.00571527	0.00171458	0.00125736
Otu00027	Bacteria;Bacteroidetes;Bacteroidia;Bacteroidales;Bacteroidaceae;Bacteroides	Bacteroidetes	Bacteroidia	Bacteroidales	Bacteroidaceae	Bacteroides	0.00785259	M06047_81_000000000CBLT5_1_2112_18036_14222	0.0020956	0.012183	0.0165457	0.0241089	0.0124021	0.00297194	0.00262902	0.00308624	0.000571527	0.00291479	0.00228611	0.0010859	0.00120021	0.00988741	0.00800137	0.00474367	0.0135452	0.0357204	0.000742985	0.0228611	0.000457221	0.0421215	0.0358919	0.0432646	0.00491513	0.0520661	0.00114305	0.00737269	0.063268	0.00405784	0.00114305	0.00537235	0.000228611	0.000342916	0.00365777	0.00262902	0.000228611	0.00537235
Otu00028	Bacteria;Proteobacteria;Gammaproteobacteria;Enterobacteriales;Enterobacteriaceae;Escherichia/Shigella	Proteobacteria	Gammaproteobacteria	Enterobacteriales	Enterobacteriaceae	Escherichia/Shigella	0.00778002	M06047_81_000000000CBLT5_1_1117_26304_15149	0.00127641	0.00524852	0.00228611	0.0113162	0.00331485	0.0118878	0.000685832	0.00148597	0.000971595	0.000742985	0.00320055	0.000571527	0.000457221	0.00863005	0.000971595	0.00268617	0.0010859	0.0176602	0.00394353	0.00102875	0.00291479	0.00125736	0.0222895	0.00697262	0.0194319	0.00920158	0.00177173	0.00822998	0.00851575	0.00617249	0.00114305	0.00240041	0.00125736	0.000400069	0.0100017	0.000228611	0.000628679	0.036692
Otu00029	Bacteria;Firmicutes;Clostridia;Clostridiales;Ruminococcaceae;Clostridium IV	Firmicutes	Clostridia	Clostridiales	Ruminococcaceae	Clostridium IV	0.00765573	C70117_71_000000000C45C2_1_2116_5854_14626	0.00882056	0.00266712	0.00120021	0.00518184	0.0131737	0.0202606	0.00354346	0.0198891	0.00371492	0.00348631	0.00777276	0.0145168	0.00937304	0.00165743	0.00165743	0.00171458	0.00085729	0.000742985	0.00285763	0.000514374	0.00085729	0.000571527	0.00245756	0.00120021	0.00302909	0.0107447	0.00788707	0.00577242	0.000114305	0.00342916	0.0102875	0.000400069	0.0463508	0.0184603	0.0010859	0.0245185	0.0532091	0.00222895
Otu00030	Bacteria;Bacteroidetes;Bacteroidia;Bacteroidales;Porphyromonadaceae;unclassified_Porphyromonadaceae	Bacteroidetes	Bacteroidia	Bacteroidales	Porphyromonadaceae	unclassified_Porphyromonadaceae	0.00754778	C70117_71_000000000C45C2_1_2106_23049_13113	0.0042293	0.0182317	0.0173887	0.00823951	0.0171744	0.00765846	0.00782991	0.00445791	0.00354346	0.00480082	0.00285763	0.00188604	0.00228611	0.00502943	0.0112019	0.00948734	0.027319	0.0540664	0.00360062	0.0408641	0.00102875	0.0240613	0.00840144	0.000914442	0.0143453	0.00331485	0.014974	0.007487	0.0248614	0.0278333	0.0197748	0.0260616	0.00194319	0.00257187	0.00125736	0.0131451	0.00251472	0.0137166
Otu00031	Bacteria;Firmicutes;Clostridia;Clostridiales;Lachnospiraceae;unclassified_Lachnospiraceae	Firmicutes	Clostridia	Clostridiales	Lachnospiraceae	unclassified_Lachnospiraceae	0.00735818	M06047_81_000000000CBLT5_1_1101_16618_20417	0.0114401	0.00847764	0.00662971	0.000666781	0.025471	0.0155741	0.0365777	0.00194319	0.00342916	0.000228611	0.000971595	0.0254901	0.0096588	0.000800137	0.00880151	0.0170315	0.00731554	0.00725839	0.00737269	0.00880151	0.00120021	0.00914442	0	0.000457221	0.000400069	0.00251472	0.000514374	0.000114305	0.00765846	0.132823	0.000514374	0.0064011	0.000285763	0.00514374	0.00371492	0.000457221	0.00137166	0.0567526
Otu00032	Bacteria;Firmicutes;Clostridia;Clostridiales;Ruminococcaceae;unclassified_Ruminococcaceae	Firmicutes	Clostridia	Clostridiales	Ruminococcaceae	unclassified_Ruminococcaceae	0.00713955	C70117_71_000000000C45C2_1_2116_18994_3175	0.00805852	0.032396	0.00581528	0.0011621	0.0174125	0.000428645	0.0218895	0.00257187	0.0107447	0.00834429	0.00137166	0.00342916	0.00371492	0.0054295	0.0964737	0.0396639	0.022461	0.0266331	0.00371492	0.0131451	0.000571527	0.00582957	0.00131451	0.00114305	0.000114305	0.00165743	0.00274333	0	0.0272618	0.026576	0.000571527	0.0494942	0.000342916	0.000228611	0.000571527	0	0.000685832	0.000457221
Otu00033	Bacteria;Bacteroidetes;Bacteroidia;Bacteroidales;Porphyromonadaceae;unclassified_Porphyromonadaceae	Bacteroidetes	Bacteroidia	Bacteroidales	Porphyromonadaceae	unclassified_Porphyromonadaceae	0.00641561	M06047_81_000000000CBLT5_1_1103_11112_12237	0.00565811	0.00503896	0.00371492	0.00439123	0.00274333	0.00871578	0.0032577	0.00411499	0.0124021	0.007487	0.00354346	0.0031434	0.00508659	0.00388638	0.00445791	0.00262902	0.0117163	0.00245756	0.00943019	0.00234326	0.00131451	0.00177173	0.00828713	0.00617249	0.00302909	0.00114305	0.00245756	0.00525804	0.0020575	0.0085729	0.00274333	0.00171458	0.000171458	0.00120021	0.0131451	0.00257187	0.00154312	0.017603
Otu00034	Bacteria;Firmicutes;Clostridia;Clostridiales;Lachnospiraceae;unclassified_Lachnospiraceae	Firmicutes	Clostridia	Clostridiales	Lachnospiraceae	unclassified_Lachnospiraceae	0.00640382	M03062_107_000000000CBKND_1_2105_19515_2280	0.00833476	0.00820141	0.00415786	0.00433408	0.0105637	0.00695834	0.00142882	0.0146311	0.00628679	0.00560096	0.0128022	0.00925873	0.0140596	0.00462937	0.00257187	0.00863005	0.00834429	0.0109733	0.0010859	0.0125736	0.00211465	0.00085729	0.000228611	0.000457221	0.00120021	0.00565811	0.0118878	0.00657256	0.00600103	0.00508659	0.0113162	0.00342916	0.0178316	0.0197177	0.00931588	0.0119449	0.00240041	0.00417214
Otu00035	Bacteria;Firmicutes;Clostridia;Clostridiales;Ruminococcaceae;unclassified_Ruminococcaceae	Firmicutes	Clostridia	Clostridiales	Ruminococcaceae	unclassified_Ruminococcaceae	0.00618609	M06047_81_000000000CBLT5_1_1108_12349_7960	0.00619154	0.00307672	0.00200034	0.00614391	0.00926826	0.0151312	0.00468652	0.0126879	0.00354346	0.00182888	0.00765846	0.00674401	0.00582957	0.00331485	0.00125736	0.00280048	0.00228611	0.00297194	0.00274333	0.00171458	0.00194319	0.00160027	0.0010859	0.0010859	0.00520089	0.00365777	0.0141739	0.0116591	0.00257187	0.00645825	0.0118306	0.00302909	0.0140024	0.0177173	0.0161742	0.0152026	0.0241184	0.00502943
Otu00036	Bacteria;Bacteroidetes;Bacteroidia;Bacteroidales;Bacteroidaceae;Bacteroides	Bacteroidetes	Bacteroidia	Bacteroidales	Bacteroidaceae	Bacteroides	0.00618065	M06047_81_000000000CBLT5_1_2115_15369_19598	0.00196224	0.0114115	0.0188032	0.013469	0.00995409	0.00207178	0.00171458	0.00342916	0.00222895	0.00177173	0.00200034	0.000628679	0.000742985	0.00200034	0.00428645	0.00268617	0.0410356	0.0177173	0.00125736	0.0233183	0.00102875	0.0496085	0.0207464	0.0238327	0.00514374	0.0285192	0.000971595	0.00160027	0.0374921	0.00508659	0.000571527	0.0132023	0.000742985	0.00262902	0.00125736	0.00194319	0.00154312	0.00354346
Otu00037	Bacteria;Firmicutes;Clostridia;Clostridiales;Ruminococcaceae;Clostridium IV	Firmicutes	Clostridia	Clostridiales	Ruminococcaceae	Clostridium IV	0.00615434	M06047_81_000000000CBLT5_1_2111_15373_20683	0.00140977	0.00102875	0.000300051	0.00670591	0.00598198	0.00347202	0.00131451	0.00131451	0.000400069	0.000457221	0.00428645	0.000685832	0.00537235	0.000171458	5.71527e-05	0.000457221	0	0.000114305	0.000628679	0.000228611	0.000342916	0	0	0.000400069	0.000400069	0.000400069	0.038178	0.00085729	0.000114305	0.000342916	0.0330914	0.000457221	0.000914442	0.000971595	0.00863005	0.000800137	0.000800137	0.00365777
Otu00038	Bacteria;Firmicutes;Bacilli;Lactobacillales;Lactobacillaceae;Lactobacillus	Firmicutes	Bacilli	Lactobacillales	Lactobacillaceae	Lactobacillus	0.00602189	M06047_81_000000000CBLT5_1_1102_12234_17585	0.00621059	0.00991599	0.00438647	0.00126688	0.00114305	0.00384352	0.00125736	0.0043436	0.0161742	0.00880151	0.00354346	0.0031434	0.0420072	0.00302909	0.00702978	0.00594388	0.000914442	0.000571527	0.0129165	0.00188604	0.000628679	0.00211465	0.00102875	0.00131451	0.000400069	0.00291479	0.00154312	0.000400069	0.000742985	0.00308624	0.000914442	0.00177173	0.000114305	0.000228611	0.00240041	0.00160027	0.000228611	0.0111448
Otu00039	Bacteria;Bacteroidetes;Bacteroidia;Bacteroidales;Porphyromonadaceae;unclassified_Porphyromonadaceae	Bacteroidetes	Bacteroidia	Bacteroidales	Porphyromonadaceae	unclassified_Porphyromonadaceae	0.00594478	M06047_81_000000000CBLT5_1_2109_6534_22417	0.00375302	0.0015717	0.000528662	0.0026195	0.000762035	0.00227182	0.00828713	0.00440075	0.00234326	0.00114305	0.00457221	0.00177173	0.00342916	0.00114305	0.00114305	0.00177173	0.000285763	0.00165743	0.000685832	0.000742985	0.000628679	5.71527e-05	0.00194319	0.00114305	0.00708693	0.00302909	0.000114305	0.00240041	0.000285763	0.00257187	0.000228611	0.000914442	0.000171458	0.000400069	0.00142882	0.000228611	0.00131451	0.00611533
Otu00040	Bacteria;Firmicutes;Clostridia;Clostridiales;unclassified_Clostridiales;	Firmicutes	Clostridia	Clostridiales	unclassified_Clostridiales		0.00584318	M06047_81_000000000CBLT5_1_2114_11789_8203	0.00446743	0.0141548	0.00124307	0.00218133	0.00337201	0.00417214	0.0150311	0.00137166	0.000171458	0.00491513	0.0020575	0.0032577	0.00200034	0.0010859	0.0328628	0.0321198	0.0160599	0.000800137	0.00400069	0.000114305	0.000571527	0.000285763	0.000114305	0	5.71527e-05	0.000285763	0.0122878	0.000342916	0.000171458	0.00268617	0.0156598	0.000400069	0.000514374	0.000800137	0.010116	0.0031434	0.00342916	0
Otu00041	Bacteria;Bacteroidetes;Bacteroidia;Bacteroidales;Porphyromonadaceae;unclassified_Porphyromonadaceae	Bacteroidetes	Bacteroidia	Bacteroidales	Porphyromonadaceae	unclassified_Porphyromonadaceae	0.0058332	C70117_71_000000000C45C2_1_1119_20224_6923	0.00833476	0.00441028	0.00202892	0.00782039	0.00184794	0.0026576	0.00485798	0.0054295	0.00874436	0.013488	0.00765846	0.00983026	0.0086872	0.00468652	0.00594388	0.00251472	0.00291479	0.00171458	0.00165743	0.00417214	0.00120021	0.0010859	0.00908727	0.00451506	0.0104018	0.00817283	0.00211465	0.0126307	0.00285763	0.000971595	0.00188604	0.00114305	0.00228611	0.00194319	0.000800137	0.0031434	0.00388638	0.00280048
Otu00042	Bacteria;Firmicutes;Clostridia;Clostridiales;Lachnospiraceae;unclassified_Lachnospiraceae	Firmicutes	Clostridia	Clostridiales	Lachnospiraceae	unclassified_Lachnospiraceae	0.00577242	M06047_81_000000000CBLT5_1_1114_23074_5794	0.00356252	0.012726	0.000214322	0.00210512	0.00338153	0.00571527	0.00211465	0.0054295	0.00851575	0.0010859	0.00354346	0.000685832	0.0289764	0.0097731	0.00628679	0.0290335	0.00120021	0.0010859	0.000228611	0.000228611	0.000285763	0.000114305	0.000171458	0.000114305	0.00354346	0.000342916	0.00257187	0.00588672	0.000114305	0.00160027	0.00165743	0.00188604	0.0020575	0.0129737	0.0043436	0.007487	0.00377208	0.00725839
Otu00043	Bacteria;Firmicutes;Clostridia;Clostridiales;unclassified_Clostridiales;	Firmicutes	Clostridia	Clostridiales	unclassified_Clostridiales		0.00554381	M06047_81_000000000CBLT5_1_2117_10487_16034	0.00990646	0.00227658	0.0035006	0.000952544	0.00126688	0.00231468	0.0182888	0.0119449	0.0031434	0.0134309	0.00285763	0.0097731	0.00485798	0.00160027	0.0020575	0.00308624	0.00114305	0.000914442	0.00742985	0.000400069	0.000457221	0.00571527	0.000342916	0.000514374	0.000285763	0.00188604	0.00228611	0.000400069	0.000171458	0.00285763	0.00234326	0.000400069	0.000628679	0.00120021	0.00085729	0.00480082	0.00085729	0.00274333
Otu00044	Bacteria;Firmicutes;Clostridia;Clostridiales;unclassified_Clostridiales;	Firmicutes	Clostridia	Clostridiales	unclassified_Clostridiales		0.00519454	M06047_81_000000000CBLT5_1_2115_4500_5936	0.00363872	0.00401974	0.00187175	0.00541045	0.00441981	0.00231468	0.000742985	0.000628679	0.00805852	0.00577242	0.00285763	0.00377208	0.0120021	0.00228611	0.00377208	0.0043436	0.000285763	0.00142882	0.00600103	0.000628679	0.000800137	5.71527e-05	0.00120021	0.000228611	0.0154884	0.0043436	0.00554381	0.00565811	5.71527e-05	0.00588672	0.00943019	0.000457221	0.00920158	0.00148597	0.00474367	0.00360062	0.000800137	0.000114305
Otu00045	Bacteria;Bacteroidetes;Bacteroidia;Bacteroidales;Bacteroidaceae;Bacteroides	Bacteroidetes	Bacteroidia	Bacteroidales	Bacteroidaceae	Bacteroides	0.00514102	C70117_71_000000000C45C2_1_2116_18604_3608	0.00145739	0.00215275	0.00477225	0.0229944	0.00658208	0.00581528	0.000914442	0.00377208	0.00148597	0.000514374	0.00182888	0.000228611	0.000228611	0.00645825	0.00188604	0.000742985	0.000914442	0.00268617	0.00297194	0.0104589	0.000171458	0.00548665	0.0345202	0.0414928	0.0010859	0.0568669	0.00354346	0.000457221	0.0162314	0.0120592	0.00262902	0.00468652	0.0031434	0.000742985	0.00365777	0.00462937	0.0139452	0.00102875
Otu00046	Bacteria;Bacteroidetes;Bacteroidia;Bacteroidales;Porphyromonadaceae;unclassified_Porphyromonadaceae	Bacteroidetes	Bacteroidia	Bacteroidales	Porphyromonadaceae	unclassified_Porphyromonadaceae	0.00507026	M06047_81_000000000CBLT5_1_2103_13368_11959	0.00885866	0.00131451	0.00390067	0.00556286	0.000666781	0.000485798	0.00445791	0.00782991	0.0064011	0.0199463	0.00428645	0.0102303	0.0020575	0.00120021	0.00211465	0.00085729	0.0010859	0.000571527	0.010116	0.000571527	0.00491513	0	0.00725839	0.00863005	0.00262902	0.0137738	0.000457221	0.000628679	0.000171458	0.00171458	0.000628679	0.000171458	0.00120021	0.000114305	0.000628679	0.000342916	0.000514374	0.000457221
Otu00047	Bacteria;Firmicutes;Clostridia;Clostridiales;unclassified_Clostridiales;	Firmicutes	Clostridia	Clostridiales	unclassified_Clostridiales		0.00506391	M06047_81_000000000CBLT5_1_2111_16191_5279	0.00532472	0.00327675	0.00121449	0.000838239	0.00300051	0.00295765	0.00920158	0.00737269	0.00120021	0.00200034	0.00417214	0.00800137	0.00194319	0.00417214	0.0043436	0.00508659	0.00371492	0.000400069	0.00348631	0.000342916	0.000457221	0.000571527	5.71527e-05	0.000571527	0.000114305	0.000514374	0.00342916	0.000342916	0.00548665	0.00611533	0.00508659	0.000628679	0.000342916	0.000342916	0.00188604	0.00388638	0.000285763	0.00577242
Otu00048	Bacteria;Firmicutes;unclassified_Firmicutes;;;	Firmicutes	unclassified_Firmicutes				0.00497772	M06047_81_000000000CBLT5_1_2107_5575_12362	0.00500086	0.0133832	0.00998743	0.00185746	0.00967785	0.00655827	0.00177173	0.00165743	0.0144025	0.00611533	0.00257187	0.00348631	0.0148025	0.0271475	0.00480082	0.00680117	0.0122307	0.0145168	0.0157741	0.0116591	0.0010859	0.0114305	0.000800137	5.71527e-05	0.0010859	0.00274333	0.00588672	0.000571527	0.0104589	0.028462	0.00520089	0.0132594	0.000342916	0.000342916	0.0250329	0.000228611	0.000285763	0.000685832
Otu00049	Bacteria;Firmicutes;Clostridia;Clostridiales;unclassified_Clostridiales;	Firmicutes	Clostridia	Clostridiales	unclassified_Clostridiales		0.0048988	M06047_81_000000000CBLT5_1_1102_16816_15825	0.00278143	0.00194319	0.000428645	0.000914442	0.00211465	0.00178602	0.00131451	0.00188604	0.0021718	0.00943019	0.00125736	0.000628679	0.00297194	5.71527e-05	0.00308624	0.00445791	0.000914442	0.000171458	0.0010859	5.71527e-05	0.000285763	0.000285763	0.000228611	0.000285763	0.000228611	5.71527e-05	0.00468652	0	0	0.00222895	0.00600103	0.000400069	0.00154312	0.00251472	0.00234326	0.00257187	0.000400069	0.00182888
Otu00050	Bacteria;Verrucomicrobia;Verrucomicrobiae;Verrucomicrobiales;Verrucomicrobiaceae;Akkermansia	Verrucomicrobia	Verrucomicrobiae	Verrucomicrobiales	Verrucomicrobiaceae	Akkermansia	0.00474911	M06047_81_000000000CBLT5_1_2102_25221_10314	0.00134309	0.000352441	0.000871578	0.0390448	0.000876341	0.00220038	5.71527e-05	0.00211465	0.000628679	0.00120021	0.00240041	0.00165743	0.000171458	0.00131451	0.000114305	5.71527e-05	0.000457221	0	0.000114305	0.00125736	0.000228611	0.00188604	0.102646	0.116591	0.00365777	0.00102875	0.00280048	0.00754415	0.000285763	0.000114305	0.00131451	0.000400069	0.0020575	0.0010859	0	0.00782991	0.00085729	0.000114305
Otu00051	Bacteria;Firmicutes;Clostridia;Clostridiales;Ruminococcaceae;unclassified_Ruminococcaceae	Firmicutes	Clostridia	Clostridiales	Ruminococcaceae	unclassified_Ruminococcaceae	0.00464116	M06047_81_000000000CBLT5_1_1110_17797_11152	0.00428645	0.0131642	0.00831571	0.000800137	0.00830619	0.00242899	0.00177173	0.00114305	0.00731554	0.0106304	0.00354346	0.00131451	0.00520089	0.00925873	0.00720123	0.00800137	0.0327485	0.0165743	0.00154312	0.0119449	0.000342916	0.0194319	0.000114305	0.000457221	0.000685832	0.00125736	0.00114305	0.00114305	0.016117	0.000800137	0.00177173	0.0305195	0.000285763	0.000342916	0.00874436	0.000285763	0.000114305	0.000571527
Otu00052	Bacteria;Firmicutes;Clostridia;Clostridiales;Ruminococcaceae;unclassified_Ruminococcaceae	Firmicutes	Clostridia	Clostridiales	Ruminococcaceae	unclassified_Ruminococcaceae	0.00457403	C70117_71_000000000C45C2_1_1116_27511_14583	0.00189556	0.00741079	0.00933017	0.00859195	0.0168981	0.00177173	0.00320055	0.00142882	0.00194319	0.000514374	0.00262902	0.00165743	0.00245756	0.000228611	0.00525804	0.00371492	0.00245756	0.0303481	0.000457221	0.0218323	0.000114305	0.0149168	0.0269189	0.0111448	0.00257187	0.00920158	0.000171458	0.00154312	0.0780705	0.00120021	0.000171458	0.0181745	0.00102875	0.00274333	0.00548665	0.000628679	0.000285763	0.000685832
Otu00053	Bacteria;Firmicutes;Clostridia;Clostridiales;Lachnospiraceae;Blautia	Firmicutes	Clostridia	Clostridiales	Lachnospiraceae	Blautia	0.00444793	M03062_107_000000000CBKND_1_2119_12194_13606	0.000666781	0.00994456	0.0177316	0.000533425	0.0221562	0.000257187	0.000114305	0.00154312	0.00165743	0.000285763	0.000228611	0.000171458	0.00280048	0.000400069	0.00491513	0.00234326	0.0159456	0.0332628	0.00725839	0.0204035	0.000628679	0.0426359	0.000285763	0.000457221	0.000171458	0.0021718	5.71527e-05	5.71527e-05	0.000457221	0.000971595	0.000171458	0.130822	0.000114305	0.000400069	0.000571527	0	5.71527e-05	0.000400069
Otu00054	Bacteria;Firmicutes;Clostridia;Clostridiales;Lachnospiraceae;Lachnospiracea_incertae_sedis	Firmicutes	Clostridia	Clostridiales	Lachnospiraceae	Lachnospiracea_incertae_sedis	0.00439622	C70117_71_000000000C45C2_1_1103_19713_16718	0.00491513	0.00332438	0.000671544	0.00248614	0.0102113	0.0084443	0.0100017	0.0120592	0.000114305	0.00102875	0.000285763	0.00600103	0.000742985	0.000285763	0.00440075	0.0136595	0.000685832	0.000171458	0.000685832	0.00085729	0.000800137	0.000342916	5.71527e-05	0.000685832	5.71527e-05	0.00268617	0.0108019	0.000628679	0.00502943	0.00908727	0.0156027	0.0238327	0.000400069	0.00731554	0.0190318	0.000114305	0.00222895	0.0124021
Otu00055	Bacteria;Bacteroidetes;Bacteroidia;Bacteroidales;Bacteroidaceae;Bacteroides	Bacteroidetes	Bacteroidia	Bacteroidales	Bacteroidaceae	Bacteroides	0.00427466	M06047_81_000000000CBLT5_1_2116_9645_7881	0.00264807	0.00178126	0.0067583	0.00160027	0.0031815	0.00360062	0.00554381	0.00102875	0.00148597	0.00211465	0.00125736	0.00445791	0.000800137	0.000800137	0.00102875	0.000800137	0.000514374	0.00674401	0.0010859	0.00308624	0.0186889	0.00417214	0.00114305	0.000228611	0.00137166	0.00274333	0.00160027	0.00251472	0.00102875	0.000800137	0.00165743	0.000685832	0.00845859	0.00645825	0.000571527	0.00211465	0.00794422	0.00377208
Otu00056	Bacteria;Firmicutes;Clostridia;Clostridiales;Lachnospiraceae;unclassified_Lachnospiraceae	Firmicutes	Clostridia	Clostridiales	Lachnospiraceae	unclassified_Lachnospiraceae	0.00420752	M06047_81_000000000CBLT5_1_2102_16693_9704	0.00328628	0.000762035	0.000285763	0.00275285	0.0121926	0.00740127	0.00194319	0.00708693	0.00131451	0.00177173	0.00320055	0.00440075	0.00114305	0.00085729	0.000628679	0.0010859	0.000571527	0.000285763	0.000514374	0.000171458	0.000400069	5.71527e-05	0.00160027	0.000685832	0.000571527	0.00405784	0.00731554	0.00228611	5.71527e-05	0.000400069	0.00817283	0.000342916	0.0594388	0.00474367	0.000342916	0.00462937	0.0237184	0.000914442
Otu00057	Bacteria;Firmicutes;Clostridia;Clostridiales;unclassified_Clostridiales;	Firmicutes	Clostridia	Clostridiales	unclassified_Clostridiales		0.00415854	M06047_81_000000000CBLT5_1_1110_21207_9609	0.00287668	0.000628679	0.000271475	0.0043436	0.00533425	0.00512945	0.00240041	0.00131451	0.00251472	0.00320055	0.00440075	0.00342916	0.000685832	0.000514374	0.000742985	0.000800137	0.000685832	0.000342916	0.000457221	0.000228611	5.71527e-05	0.000342916	0.00274333	0.00102875	0.00337201	0.0110876	0.00662971	0.00120021	0.00200034	0.00691547	0.00605818	0.00171458	0.00948734	0.00582957	0.00480082	0.00863005	0.00468652	0.00240041
Otu00058	Bacteria;Proteobacteria;Betaproteobacteria;Burkholderiales;Sutterellaceae;Parasutterella	Proteobacteria	Betaproteobacteria	Burkholderiales	Sutterellaceae	Parasutterella	0.00408596	C70117_71_000000000C45C2_1_1117_19531_21305	0.00446743	0.000819188	0.00691547	0.00335296	0.00120973	0.00267189	0.00131451	0.0010859	0.0130308	0.00497228	0.00188604	0.00451506	0.000342916	0.00137166	0.0010859	0.000628679	0.000800137	0.000685832	0.00657256	0.00131451	0.0188604	0.000914442	0.000800137	0.000285763	0.00874436	0.00102875	0.00194319	0.00731554	0.000342916	0.00120021	0.00320055	0.000628679	0.000971595	0.000914442	0.00240041	0.00342916	0.000628679	0.0042293
Otu00059	Bacteria;Firmicutes;Clostridia;Clostridiales;Lachnospiraceae;unclassified_Lachnospiraceae	Firmicutes	Clostridia	Clostridiales	Lachnospiraceae	unclassified_Lachnospiraceae	0.0040778	M06047_81_000000000CBLT5_1_2114_4412_11043	0.0049056	0.00462937	0.00160027	0.00125736	0.00229563	0.0013288	0.00685832	0.00377208	0.00874436	0.00497228	0.00251472	0.00257187	0.0115448	0.00600103	0.000914442	0.00182888	0.00554381	0.00194319	0.00308624	0.00165743	5.71527e-05	0.00160027	0.000800137	0.000571527	0.000342916	0.00382923	0.00177173	0.000228611	0.00245756	0.00251472	0.00302909	0.00468652	0.000685832	0.000400069	0.00171458	0.00165743	0.000800137	0.00114305
Otu00060	Bacteria;Firmicutes;Clostridia;Clostridiales;Ruminococcaceae;Oscillibacter	Firmicutes	Clostridia	Clostridiales	Ruminococcaceae	Oscillibacter	0.00404786	M06047_81_000000000CBLT5_1_2112_23459_15403	0.00521994	0.00238136	0.00125736	0.00375302	0.00570574	0.00715837	0.00788707	0.00960165	0.00308624	0.00165743	0.00537235	0.00371492	0.00497228	0.00222895	0.00142882	0.00245756	0.000914442	0.00228611	0.0010859	0.000457221	0.000400069	0.00308624	0.00120021	0.00114305	0.00142882	0.00817283	0.00611533	0.00445791	0.00851575	0.0031434	0.00622964	0.00360062	0.00485798	0.00788707	0.00308624	0.00851575	0.0146882	0.00234326
Otu00061	Bacteria;Candidatus Saccharibacteria;;;;Saccharibacteria_genera_incertae_sedis	Candidatus Saccharibacteria				Saccharibacteria_genera_incertae_sedis	0.00383467	M06047_81_000000000CBLT5_1_1114_23142_20712	0.002248	0.00777276	0.00993027	0.000152407	0.00302909	0.00161456	0.00194319	0.00165743	0.00200034	0.00560096	0.000800137	0.00148597	0.0032577	0.00765846	0.00514374	0.00491513	0.0112019	0.0144596	0.00571527	0.018346	0.000342916	0.0153169	0	0	0	0.000685832	0.000228611	0	0	0.000228611	0.000685832	0.0168029	0	0.000457221	0.00571527	0.000171458	0.000114305	0.000457221
Otu00062	Bacteria;Bacteroidetes;Bacteroidia;Bacteroidales;Porphyromonadaceae;Parabacteroides	Bacteroidetes	Bacteroidia	Bacteroidales	Porphyromonadaceae	Parabacteroides	0.00380383	C70117_71_000000000C45C2_1_1104_3929_11141	0.00159075	0.00337201	0.00477225	0.00348631	0.00889676	0.00284334	0.00137166	0.000514374	0.00171458	0.00365777	0.000685832	0.00160027	0.000685832	0.00268617	0.00280048	0.00114305	0.00742985	0.00548665	0.00114305	0.00171458	0.0117163	0.00451506	0.000914442	0.000685832	0.00291479	0.00588672	0.00897297	0.00154312	0.0156598	0.00382923	0.00897297	0.0150311	0.00943019	0.000457221	0.00405784	0.00085729	0.000400069	0.00605818
Otu00063	Bacteria;Firmicutes;Clostridia;Clostridiales;Lachnospiraceae;unclassified_Lachnospiraceae	Firmicutes	Clostridia	Clostridiales	Lachnospiraceae	unclassified_Lachnospiraceae	0.00379294	M06047_81_000000000CBLT5_1_2114_8510_13765	0.0053533	0.00469604	0.00102875	0.00300051	0.00515326	0.00404355	0.0145739	0.00285763	0.000914442	0.00160027	0.00834429	0.00382923	0.013488	0.00102875	0.00268617	0.00874436	0.00120021	0.00102875	0.00200034	0.00165743	0.000285763	0.000171458	0.0020575	0.000457221	0.00177173	0.00560096	0.0031434	0.00497228	0.00131451	0.00337201	0.00371492	0.00125736	0.0192604	0.00200034	0.00137166	0.00120021	0.013088	0.000514374
Otu00064	Bacteria;Firmicutes;Clostridia;Clostridiales;unclassified_Clostridiales;	Firmicutes	Clostridia	Clostridiales	unclassified_Clostridiales		0.0037757	M06047_81_000000000CBLT5_1_2106_12309_17494	0.0038197	0.00351489	0.000871578	0.000866815	0.00618201	0.00310053	0.00354346	0.00308624	0.000628679	0.00257187	0.00331485	0.0097731	0.00165743	0.00331485	0.0054295	0.00611533	0.00417214	0.000400069	0.00257187	0.000228611	0.000457221	0.000228611	5.71527e-05	0.000114305	0.0021718	0.000628679	0.00137166	0.00085729	0.0172601	0.00525804	0.00194319	0.000171458	0.00720123	0.00525804	0.00474367	0.00491513	0.00194319	0.000800137
Otu00065	Bacteria;Candidatus Saccharibacteria;;;;Saccharibacteria_genera_incertae_sedis	Candidatus Saccharibacteria				Saccharibacteria_genera_incertae_sedis	0.00363509	M06047_81_000000000CBLT5_1_1107_8015_8166	0.00306719	0.00284811	0.00551523	0.00122878	0.00155265	0.00417214	0.00302909	0.00457221	0.000628679	0.00228611	0.00200034	0.00588672	0.00182888	0.00257187	0.0021718	0.00297194	0.00371492	0.00382923	0.00285763	0.00320055	0.000514374	0.0154884	0.000514374	0.000228611	0.00251472	0.000914442	0.00194319	0.00125736	0.000971595	0.00131451	0.00291479	0.00154312	0.000171458	0.00240041	0.00280048	0.00520089	0.00582957	0.00285763
Otu00066	Bacteria;Firmicutes;Clostridia;Clostridiales;Ruminococcaceae;Clostridium IV	Firmicutes	Clostridia	Clostridiales	Ruminococcaceae	Clostridium IV	0.0035607	M06047_81_000000000CBLT5_1_2118_18701_5871	0.0031815	0.00441028	0.00177173	0.00234326	0.00133356	0.000957307	0.000685832	0.0021718	0.00834429	0.00394353	0.0021718	0.00177173	0.00560096	0.00125736	0.0097731	0.00874436	0.000228611	0.00085729	0.00451506	0.00137166	0.000342916	0.00085729	0.000800137	0.000400069	0.00102875	0.00548665	0.00440075	0.00194319	0	0.00337201	0.0032577	0.000285763	0.000685832	0.000400069	0.000342916	0.00171458	5.71527e-05	0.00171458
Otu00067	Bacteria;Firmicutes;Clostridia;Clostridiales;Clostridiaceae 1;Clostridium sensu stricto	Firmicutes	Clostridia	Clostridiales	Clostridiaceae 1	Clostridium sensu stricto	0.00352895	M06047_81_000000000CBLT5_1_2103_17971_15330	0.000371492	0.0031815	0.012245	0.0161266	0.000952544	0.00621535	0	0.000742985	0.000114305	0.000171458	0.00102875	0.000171458	0.00491513	0.00537235	0.00520089	0.0032577	5.71527e-05	0.000285763	0.046808	0.000571527	0.000914442	0.000685832	0.00880151	0.0222895	0.0653255	0.000285763	5.71527e-05	0	0.00200034	0.00360062	0	5.71527e-05	0	5.71527e-05	0.00577242	0	0	0.019089
Otu00068	Bacteria;Firmicutes;Clostridia;Clostridiales;Ruminococcaceae;unclassified_Ruminococcaceae	Firmicutes	Clostridia	Clostridiales	Ruminococcaceae	unclassified_Ruminococcaceae	0.00351625	M06047_81_000000000CBLT5_1_1115_7858_2538	0.00399116	0.00306719	0.0019289	0.00285763	0.00851575	0.00722981	0.00702978	0.00394353	0.0031434	0.00085729	0.00634394	0.00262902	0.00348631	0.00874436	0.00102875	0.00171458	0.00188604	0.00154312	0.0020575	0.00131451	0.00160027	0.00274333	0.000685832	0.000400069	0.00171458	0.0020575	0.00605818	0.00622964	0.00257187	0.0042293	0.0064011	0.00154312	0.0117734	0.0245756	0.00234326	0.0142882	0.00920158	0.00308624
Otu00069	Bacteria;Bacteroidetes;Bacteroidia;Bacteroidales;Porphyromonadaceae;unclassified_Porphyromonadaceae	Bacteroidetes	Bacteroidia	Bacteroidales	Porphyromonadaceae	unclassified_Porphyromonadaceae	0.0034591	M01394_160_000000000C9RJW_1_1102_22189_9333	0.00503896	0.00165743	0.00115734	0.0031815	0.00227658	0.00208607	0.00348631	0.00280048	0.00897297	0.00308624	0.0043436	0.00754415	0.00182888	0.000800137	0.00428645	0.00200034	0.000742985	0.000285763	0.00377208	0.000571527	0.000285763	0	0.000228611	0.000228611	0.0053152	0.000571527	0.0053152	0.00742985	0	0.00131451	0.00571527	0.000171458	0.00411499	0.00234326	0.00297194	0.00371492	0.00114305	0.000514374
Otu00070	Bacteria;Bacteroidetes;Bacteroidia;Bacteroidales;Bacteroidaceae;Bacteroides	Bacteroidetes	Bacteroidia	Bacteroidales	Bacteroidaceae	Bacteroides	0.0034591	M06047_81_000000000CBLT5_1_2106_10237_9203	0.000285763	6.66781e-05	0.0483226	0.000142882	0.000133356	0.000357204	0.000228611	0.000285763	0.000400069	0.000285763	0.000228611	0.000285763	5.71527e-05	0.000285763	0	0	0	5.71527e-05	0.000742985	0.000342916	0.191633	0.000571527	0.000342916	0.000400069	0.000114305	0	0	0	5.71527e-05	0.000114305	0	5.71527e-05	0.000457221	0.000114305	0.0010859	0	0.000171458	0.000171458
Otu00071	Bacteria;Bacteroidetes;Bacteroidia;Bacteroidales;Porphyromonadaceae;unclassified_Porphyromonadaceae	Bacteroidetes	Bacteroidia	Bacteroidales	Porphyromonadaceae	unclassified_Porphyromonadaceae	0.00330125	M06047_81_000000000CBLT5_1_2108_12507_3083	0.00075251	6.66781e-05	0.000442933	0.000123831	0.000133356	4.28645e-05	5.71527e-05	0.00320055	0	0	0.00114305	0.000114305	0.000171458	5.71527e-05	0	5.71527e-05	5.71527e-05	5.71527e-05	0.00125736	0	0.000514374	0	5.71527e-05	5.71527e-05	0.000342916	0	0.000171458	0.000114305	0	0	0.000571527	0	5.71527e-05	0.000171458	0	0.000114305	0	5.71527e-05
Otu00072	Bacteria;Firmicutes;Clostridia;Clostridiales;Ruminococcaceae;Ruminococcus	Firmicutes	Clostridia	Clostridiales	Ruminococcaceae	Ruminococcus	0.00325226	M06047_81_000000000CBLT5_1_2111_12781_18665	0.0026576	0.00968737	0.014874	0.000657256	0.00612486	0.00111448	0	0.000342916	0.0042293	0.010859	0.000342916	0.000171458	0.00331485	0.00394353	0.000742985	0.000971595	0.0096588	0.0394925	0.000685832	0.000742985	0.000228611	0.0578385	5.71527e-05	5.71527e-05	0	0.00302909	0.000685832	0.000114305	0	0.00697262	0.00131451	0.0283477	0	0.000114305	0.000628679	0.000342916	0.0031434	0.000342916
Otu00073	Bacteria;Firmicutes;Clostridia;Clostridiales;Ruminococcaceae;Oscillibacter	Firmicutes	Clostridia	Clostridiales	Ruminococcaceae	Oscillibacter	0.00319601	M06047_81_000000000CBLT5_1_2114_26043_7844	0.00221943	0.00380065	0.00274333	0.00290526	0.00592483	0.00505801	0.0010859	0.00194319	0.00302909	0.00102875	0.00331485	0.00291479	0.00360062	0.00983026	0.000342916	0.00154312	0.00251472	0.00497228	0.00200034	0.00308624	0.00137166	0.00451506	0.000742985	0.000400069	0.00142882	0.00268617	0.00645825	0.00571527	0.00428645	0.00725839	0.0053152	0.00742985	0.00211465	0.00914442	0.00817283	0.00468652	0.00245756	0.00491513
Otu00074	Bacteria;Firmicutes;Clostridia;Clostridiales;Ruminococcaceae;unclassified_Ruminococcaceae	Firmicutes	Clostridia	Clostridiales	Ruminococcaceae	unclassified_Ruminococcaceae	0.00317061	C70117_71_000000000C45C2_1_2115_20583_20217	0.00110495	0.00249567	0.00381494	0.00381018	0.00336248	0.000771561	0.000514374	0.000457221	0.000114305	0	0.00514374	0.000400069	0.000457221	0.000514374	0.000285763	0.00148597	0.0110876	0.00114305	0.000285763	0.000914442	0.000742985	0.0133166	0.00085729	0.000228611	0.00085729	0.018346	0.00120021	0.00137166	0.00485798	0.00182888	0.000971595	0.00983026	0.000742985	0.00194319	0.000800137	0.00177173	0.000457221	5.71527e-05
Otu00075	Bacteria;Firmicutes;Clostridia;Clostridiales;Lachnospiraceae;unclassified_Lachnospiraceae	Firmicutes	Clostridia	Clostridiales	Lachnospiraceae	unclassified_Lachnospiraceae	0.0031688	C70117_71_000000000C45C2_1_2115_21745_13076	9.52544e-05	0.001124	5.71527e-05	0.000571527	0.000400069	0.00220038	0.000114305	0.000228611	0	5.71527e-05	5.71527e-05	0.000114305	0.00508659	0	0.000514374	0.000514374	0.000400069	0.000228611	0.000114305	5.71527e-05	5.71527e-05	0	0	0	0.000971595	0.000114305	0.00131451	0.00102875	5.71527e-05	0.000228611	0.000514374	0.000457221	0.000571527	0.000571527	5.71527e-05	0.00525804	0.00308624	0.000400069
Otu00076	Bacteria;Bacteroidetes;Bacteroidia;Bacteroidales;Porphyromonadaceae;unclassified_Porphyromonadaceae	Bacteroidetes	Bacteroidia	Bacteroidales	Porphyromonadaceae	unclassified_Porphyromonadaceae	0.00315882	M06047_81_000000000CBLT5_1_2115_15069_10219	0.00338153	0.00182888	0.000500086	0.00272428	0.00174316	0.00195748	0.00371492	0.00308624	0.00320055	0.00337201	0.00308624	0.00382923	0.00200034	0.00371492	0.00194319	0.00194319	0.000742985	0.000628679	0.00137166	0.000285763	0.000228611	0.000114305	0.000742985	0.000285763	0.00131451	0.00371492	0.00554381	0.00474367	0.000342916	0.00160027	0.0064011	0.000114305	0.000914442	0.0010859	0.00222895	0.00274333	0.00114305	0.00171458
Otu00077	Bacteria;Firmicutes;Clostridia;Clostridiales;Lachnospiraceae;unclassified_Lachnospiraceae	Firmicutes	Clostridia	Clostridiales	Lachnospiraceae	unclassified_Lachnospiraceae	0.00310076	M06047_81_000000000CBLT5_1_2119_23388_8643	0.0038197	0.000742985	8.5729e-05	0.000285763	0.00279095	0.000928731	0.000171458	0.000628679	0.000228611	0.000114305	0.00605818	0.015717	0	0.000285763	0.000514374	0.00297194	0.000685832	0	0.000114305	0.000114305	0.000114305	0	0	0.000285763	0.000628679	0.000171458	0.000400069	0.000228611	0.000742985	0.00440075	5.71527e-05	0.000114305	0.000171458	0.0112591	0.00182888	5.71527e-05	0.000285763	0.00154312
Otu00078	Bacteria;Bacteroidetes;Bacteroidia;Bacteroidales;Porphyromonadaceae;Parabacteroides	Bacteroidetes	Bacteroidia	Bacteroidales	Porphyromonadaceae	Parabacteroides	0.00298917	M06047_81_000000000CBLT5_1_2102_9419_19932	0.0026195	0.00043817	0.00038578	0.0059915	0.000781086	0.00120021	0.000514374	0.00257187	0.000514374	0.00308624	0.00291479	0.00611533	0.000685832	0.000628679	0.000800137	0.000228611	0.000228611	5.71527e-05	0.000514374	0.000114305	0.000628679	0.000285763	0.0128022	0.0131451	0.00371492	0.00297194	0.000971595	0.00234326	0.000457221	0.000171458	0.00085729	0.000342916	0.000400069	0.00245756	0	0.00337201	0.000971595	0.000457221
Otu00079	Bacteria;Bacteroidetes;Bacteroidia;Bacteroidales;Rikenellaceae;Alistipes	Bacteroidetes	Bacteroidia	Bacteroidales	Rikenellaceae	Alistipes	0.00296831	C70117_71_000000000C45C2_1_2107_14980_10090	0.000485798	0.00258139	0.0262188	0.00582005	0.00311482	0.000228611	0.000285763	0.000971595	0.000457221	0.000114305	0.000800137	0.000285763	0.000400069	0.00142882	0.000171458	0.000742985	0.000971595	0.0117734	0.00177173	0.0931017	0.000742985	0.00925873	0.00851575	0.00805852	0.00085729	0.0173744	0	0.000114305	0.011602	0.000628679	0.000114305	0.00565811	0.000685832	0	0.000571527	0.000171458	0.000114305	5.71527e-05
Otu00080	Bacteria;Firmicutes;Clostridia;Clostridiales;unclassified_Clostridiales;	Firmicutes	Clostridia	Clostridiales	unclassified_Clostridiales		0.0029547	M06047_81_000000000CBLT5_1_1119_4377_14873	0.00473414	0.0021337	0.000800137	0.000885866	0.00113353	0.00220038	0.00388638	0.00600103	0.00222895	0.00291479	0.00548665	0.00788707	0.00348631	0.00188604	0.00291479	0.00297194	0.000914442	0.000628679	0.00280048	5.71527e-05	0.000114305	0.000228611	0.000228611	0.000228611	0.00245756	0.000228611	0.00142882	0.000742985	0.000342916	0.000628679	0.00171458	0.000114305	0.00102875	0.00297194	0.0021718	0.000914442	0.00360062	0.00211465
Otu00081	Bacteria;Firmicutes;Clostridia;Clostridiales;Ruminococcaceae;unclassified_Ruminococcaceae	Firmicutes	Clostridia	Clostridiales	Ruminococcaceae	unclassified_Ruminococcaceae	0.00292386	C70117_71_000000000C45C2_1_1113_20785_8389	0.00132404	0.000361967	5.71527e-05	0.00900154	0.000695357	0.000228611	0.00285763	0.000800137	0.000571527	0.000342916	0.00114305	0.00222895	0.000800137	0.000228611	0.000342916	0.000457221	0.000342916	0	0.000228611	0	0	0	0.0290907	0.0175459	0.00457221	0.000742985	0.000171458	0.00188604	0.00125736	0.000514374	0.000171458	5.71527e-05	0.000800137	0.00137166	0	0.000628679	0.000285763	0
Otu00082	Bacteria;Firmicutes;Clostridia;Clostridiales;Ruminococcaceae;Ruminococcus	Firmicutes	Clostridia	Clostridiales	Ruminococcaceae	Ruminococcus	0.00289846	M06047_81_000000000CBLT5_1_2104_13775_18192	0.00719171	0.00491513	0.000514374	0.000771561	0.00281953	0.00228611	0.0228611	0.00114305	0.00594388	0.00485798	0.00582957	0.00251472	0.0076013	0.00177173	0.00560096	0.0124021	0.00085729	0.00125736	0.00131451	0.000342916	0.000228611	0.000171458	0.000114305	0.000171458	0.000171458	0.00257187	0.00137166	0.000228611	0.000514374	0.000800137	0.00114305	0.00308624	0.00240041	0.00897297	0.00160027	0.00308624	0.0043436	0.000114305
Otu00083	Bacteria;Bacteroidetes;Bacteroidia;Bacteroidales;Porphyromonadaceae;unclassified_Porphyromonadaceae	Bacteroidetes	Bacteroidia	Bacteroidales	Porphyromonadaceae	unclassified_Porphyromonadaceae	0.00277326	M06047_81_000000000CBLT5_1_1102_5826_9686	0.00239089	0.00158122	0.000357204	0.00229563	0.00177173	0.00164314	0.00262902	0.000914442	0.00228611	0.00337201	0.00257187	0.00257187	0.00165743	0.00342916	0.00200034	0.00148597	0.000457221	0.000457221	0.000800137	0.000400069	0.000228611	0	0.000457221	0.000285763	0.00131451	0.00211465	0.00714408	0.00245756	0.000800137	0.00142882	0.0064011	0.000114305	0.000685832	0.00120021	0.0020575	0.00240041	0.00148597	0.000628679
Otu00084	Bacteria;Proteobacteria;Deltaproteobacteria;Desulfovibrionales;Desulfovibrionaceae;unclassified_Desulfovibrionaceae	Proteobacteria	Deltaproteobacteria	Desulfovibrionales	Desulfovibrionaceae	unclassified_Desulfovibrionaceae	0.00270613	M06047_81_000000000CBLT5_1_1101_6684_22214	0.00234326	0.00138119	0.00127165	0.00288621	0.00312435	0.00294336	0.000457221	0.00337201	0.000742985	0.000342916	0.00582957	0.00331485	0.000228611	0.00308624	0.000342916	0.000400069	0.00222895	0.00200034	0.00102875	0.00182888	0.000628679	0.00160027	0.00245756	0.000685832	0.000800137	0.00720123	0.00280048	0.00337201	0.000685832	0.00348631	0.00348631	0.000514374	0.00405784	0.0065154	0.00234326	0.00497228	0.00262902	0.00182888
Otu00085	Bacteria;Firmicutes;Clostridia;Clostridiales;Ruminococcaceae;Ruminococcus	Firmicutes	Clostridia	Clostridiales	Ruminococcaceae	Ruminococcus	0.00270069	M06047_81_000000000CBLT5_1_1102_6363_10162	0.00149549	0.00346726	0.00101446	7.62035e-05	0.00548665	0.0109304	0.00874436	0.000114305	0	0	0.000114305	0	0.000971595	0.000285763	0.0101732	0.00720123	0.00142882	0.000742985	0.00137166	0.00131451	0.000514374	0.00085729	5.71527e-05	0	0.000114305	0.000171458	0	0.000114305	0.0106304	0.0182888	0	0.00377208	0.000228611	0	0.0353775	0	0	0.00834429
Otu00086	Bacteria;Firmicutes;Clostridia;Clostridiales;Lachnospiraceae;Roseburia	Firmicutes	Clostridia	Clostridiales	Lachnospiraceae	Roseburia	0.00268073	M01394_160_000000000C9RJW_1_1107_18377_6394	0.00330533	0.00130499	0.00155741	0.00928731	0.00242899	0.00174316	0.00222895	0.00354346	0.000285763	0.000171458	0.00462937	0.00897297	5.71527e-05	0.000914442	5.71527e-05	0.000342916	0.00645825	0	0.00114305	0.0032577	0.00165743	0.000171458	0.00731554	0.00634394	0.00331485	0.00571527	0.00251472	0.0305195	0.00085729	0.000285763	0.00251472	0.00148597	0.00388638	0.00554381	0.000228611	0.00177173	0.00417214	0.000800137
Otu00087	Bacteria;Firmicutes;Clostridia;Clostridiales;unclassified_Clostridiales;	Firmicutes	Clostridia	Clostridiales	unclassified_Clostridiales		0.0026635	M06047_81_000000000CBLT5_1_1119_20787_19233	0.00272428	0.00188604	0.000985883	0.000562001	0.00138119	0.00247185	0.00302909	0.000685832	0.00234326	0.00428645	0.00234326	0.00365777	0.00194319	0.00234326	0.00194319	0.00234326	0.00257187	0.000171458	0.00320055	0.000285763	0.000228611	0.000228611	0.000171458	5.71527e-05	0.000171458	0.000228611	0.0021718	0.000571527	5.71527e-05	0.00417214	0.00320055	0	0.000228611	0.000628679	0.00537235	0.00365777	0.00085729	0
Otu00088	Bacteria;Firmicutes;Clostridia;Clostridiales;Lachnospiraceae;unclassified_Lachnospiraceae	Firmicutes	Clostridia	Clostridiales	Lachnospiraceae	unclassified_Lachnospiraceae	0.00264989	M06047_81_000000000CBLT5_1_2112_27515_14487	0.000657256	3.81018e-05	8.5729e-05	0.000238136	0.000247662	0.001686	0.000571527	0.000514374	0.0010859	0.000285763	0.00085729	0.000628679	5.71527e-05	0	0	0	0.000171458	0	5.71527e-05	0.000285763	0	0	0	0	0.000628679	0	0.000457221	0.000342916	0	0	0.000171458	0.000342916	0.000457221	0.000514374	5.71527e-05	0.000342916	0.00634394	0
Otu00089	Bacteria;Firmicutes;Clostridia;Clostridiales;Lachnospiraceae;unclassified_Lachnospiraceae	Firmicutes	Clostridia	Clostridiales	Lachnospiraceae	unclassified_Lachnospiraceae	0.00261904	C70117_71_000000000C45C2_1_2109_19911_6892	0.0075632	0.00096207	0.000357204	0.000562001	0.00835381	0.00387209	0.00394353	0.000800137	0.000800137	0.000571527	0.0232611	0.0160027	0.000685832	0.00388638	5.71527e-05	0.000342916	0.000742985	5.71527e-05	0.000685832	0.000228611	0.000342916	0.000171458	0.000228611	0.00165743	0.000171458	0.000285763	0.000685832	0.000342916	0.000400069	0.000171458	0.000400069	0.000457221	0.000742985	0.0479511	0.00440075	0.000342916	0.000171458	0.0105732
Otu00090	Bacteria;Firmicutes;Clostridia;Clostridiales;Lachnospiraceae;Blautia	Firmicutes	Clostridia	Clostridiales	Lachnospiraceae	Blautia	0.00261632	M03062_107_000000000CBKND_1_1108_4746_16892	0.00043817	0.00867768	0.0037435	3.81018e-05	0.00220038	0.000485798	0.00131451	0.000628679	0.000114305	5.71527e-05	0.000171458	0.000342916	0.000342916	0.0053152	0.00474367	0.00554381	0.00668686	0.0294336	0.000971595	0.00828713	0.000171458	0.00554381	5.71527e-05	5.71527e-05	0	0.000114305	0	0	0.0042293	0.00297194	0	0.00600103	0	0	0.00171458	0	0	0.000228611
Otu00091	Bacteria;Firmicutes;Clostridia;Clostridiales;Lachnospiraceae;unclassified_Lachnospiraceae	Firmicutes	Clostridia	Clostridiales	Lachnospiraceae	unclassified_Lachnospiraceae	0.00261541	C70117_71_000000000C45C2_1_2106_10488_16784	0.00121926	0.00322912	0.000957307	0.00584862	0.0027338	0.00658684	0	0.00480082	0.000685832	0.000571527	0.000685832	0.000571527	0.0115448	0.00142882	0.0010859	0.00251472	0.00234326	0.000457221	0.00148597	0.000285763	0.000514374	0.00154312	0.00971595	0.00308624	0.000914442	0.00102875	0.00811568	0.0122307	0.000228611	0.000971595	0.00474367	0.00131451	0.000628679	0.00851575	0.000171458	0.0248614	0.00120021	0.000114305
Otu00092	Bacteria;Firmicutes;Clostridia;Clostridiales;Lachnospiraceae;unclassified_Lachnospiraceae	Firmicutes	Clostridia	Clostridiales	Lachnospiraceae	unclassified_Lachnospiraceae	0.00252742	C70117_71_000000000C45C2_1_2111_16827_15791	0.00171458	0.000180983	8.5729e-05	0.00722981	0.000733459	0.00324341	0.000457221	0.00131451	0.00708693	0.000742985	0.000342916	0.000342916	0.000514374	0	0.000114305	5.71527e-05	0.000228611	0.000171458	0.000228611	5.71527e-05	5.71527e-05	0	0.000685832	5.71527e-05	0.00502943	0.00125736	0.00188604	0.0344631	0.000114305	0.000171458	0.00085729	0.000285763	0.000685832	0.00228611	0.00085729	0.000342916	0.0105732	0.00120021
Otu00093	Bacteria;Firmicutes;Negativicutes;Selenomonadales;Acidaminococcaceae;Phascolarctobacterium	Firmicutes	Negativicutes	Selenomonadales	Acidaminococcaceae	Phascolarctobacterium	0.0025256	M06047_81_000000000CBLT5_1_2110_8336_20264	0.00043817	0.00733459	0.0105018	0.00568669	0.00146692	0.000871578	0.00102875	0.000685832	0.000171458	5.71527e-05	0.000457221	0.000228611	0.000514374	0.00834429	0.0132023	0.00337201	0.011602	0.00697262	0.000457221	0.0135452	0.000342916	0.0276619	0.000742985	5.71527e-05	0.00171458	0.0200034	0.000457221	0.0111448	0.00114305	0.00125736	0.000228611	0.00451506	0.0010859	0.000571527	0.00211465	0.000742985	0.000514374	0.000114305
Otu00094	Bacteria;Firmicutes;Clostridia;Clostridiales;Ruminococcaceae;unclassified_Ruminococcaceae	Firmicutes	Clostridia	Clostridiales	Ruminococcaceae	unclassified_Ruminococcaceae	0.00251381	M06047_81_000000000CBLT5_1_1102_24722_17008	0.00335296	0.00219085	0.00251472	0.00228611	0.0027719	0.00284334	0.00120021	0.00445791	0.00148597	0.00125736	0.00388638	0.00782991	0.00245756	0.00262902	0.000800137	0.00222895	0.00137166	0.00365777	0.00262902	0.00382923	0.000400069	0.00320055	0.00302909	0.00125736	0.00165743	0.00457221	0.00182888	0.00137166	0.00497228	0.00280048	0.0021718	0.00302909	0.0020575	0.00160027	0.00320055	0.00268617	0.00274333	0.00274333
Otu00095	Bacteria;Firmicutes;Clostridia;Clostridiales;Ruminococcaceae;unclassified_Ruminococcaceae	Firmicutes	Clostridia	Clostridiales	Ruminococcaceae	unclassified_Ruminococcaceae	0.00248478	M06047_81_000000000CBLT5_1_2108_12897_10309	0.00158122	0.00311482	0.000871578	0.00555333	0.00529615	0.00414357	0.00137166	0.00405784	0.00154312	5.71527e-05	0.0021718	0.000285763	0.00880151	0.00148597	0.00234326	0.00382923	0.00131451	0.000914442	0.000114305	0.0021718	0.000285763	0.000914442	0	0.000285763	5.71527e-05	0.00251472	0.0296622	0.000800137	0	0.00142882	0.0233183	0.000914442	0.00502943	0.0010859	0.00280048	0.0128593	0.000742985	0.000171458
Otu00096	Bacteria;Firmicutes;Clostridia;Clostridiales;Ruminococcaceae;unclassified_Ruminococcaceae	Firmicutes	Clostridia	Clostridiales	Ruminococcaceae	unclassified_Ruminococcaceae	0.00247934	M06047_81_000000000CBLT5_1_2115_3808_17735	0.000952544	0.00509611	0.00294336	0.006925	0.00402926	0.000628679	5.71527e-05	0.000285763	0.00262902	0.00137166	0.000571527	0.000800137	0.000228611	0.000514374	0.00165743	0.00114305	0.0257187	0.00131451	0.00125736	0.00411499	0.000171458	0.00622964	0.0257187	0.0106304	0.000571527	0.00354346	0.000114305	0.000971595	0.0189747	0.00142882	0.000285763	0.00228611	0.000171458	0.00102875	0.00148597	0.000171458	0.000171458	0.000685832
Otu00097	Bacteria;Firmicutes;Clostridia;Clostridiales;Ruminococcaceae;unclassified_Ruminococcaceae	Firmicutes	Clostridia	Clostridiales	Ruminococcaceae	unclassified_Ruminococcaceae	0.00246119	C70117_71_000000000C45C2_1_2116_3493_11886	0.00464842	0.0022099	0.000800137	0.00260045	0.00139071	0.00202892	0.00440075	0.00251472	0.00617249	0.00451506	0.00371492	0.00657256	0.00331485	0.00137166	0.00188604	0.00211465	0.00337201	0.00120021	0.000628679	0.000742985	0.000742985	0.0010859	0.00337201	0.00302909	0.00360062	0.00194319	0.000628679	0.00302909	0.000971595	0.00234326	0.00148597	0.000685832	0.000400069	0.00245756	0.00394353	0.000571527	0.00142882	0.0021718
Otu00098	Bacteria;Firmicutes;Clostridia;Clostridiales;Ruminococcaceae;unclassified_Ruminococcaceae	Firmicutes	Clostridia	Clostridiales	Ruminococcaceae	unclassified_Ruminococcaceae	0.00245847	C70117_71_000000000C45C2_1_1113_20446_7156	0.00193366	0.00124783	0.00158599	0.00293384	0.00363872	0.00215751	0.000685832	0.00428645	0.00222895	0.000514374	0.00251472	0.00137166	0.00194319	0.000971595	0.00085729	0.00114305	0.00125736	0.00131451	0.000914442	0.0031434	0.000342916	0.00194319	0.00085729	0.000514374	0.00297194	0.00228611	0.00234326	0.00863005	0.00268617	0.00502943	0.00188604	0.00365777	0.00194319	0.00662971	0.0021718	0.00268617	0.00222895	0.00154312
Otu00099	Bacteria;Firmicutes;Clostridia;Clostridiales;Lachnospiraceae;Roseburia	Firmicutes	Clostridia	Clostridiales	Lachnospiraceae	Roseburia	0.00236957	M06047_81_000000000CBLT5_1_2114_24413_14877	0.00377208	0.00120973	0.000142882	0.0036673	0.00444838	0.00305767	0.000285763	0.00474367	0.000114305	0.000114305	0.0126879	0.00468652	0.0020575	0.00154312	0.000514374	0.00194319	0.00085729	0.000342916	0.000228611	0.000114305	0.000114305	0.000114305	0.000114305	0.000114305	5.71527e-05	0.000285763	0.0206893	0.000742985	0.000171458	0.00177173	0.0200034	0.000800137	0.00308624	0.00085729	0.00662971	0.000400069	0.000571527	0.00462937
Otu00100	Bacteria;Firmicutes;Clostridia;Clostridiales;unclassified_Clostridiales;	Firmicutes	Clostridia	Clostridiales	unclassified_Clostridiales		0.00233872	M06047_81_000000000CBLT5_1_2106_8356_13911	0.00271475	0.00145739	0.000228611	0.000933493	0.00386733	0.00115734	0.000914442	0.00337201	0.00480082	0.00154312	0.00417214	0.00148597	0.00154312	0.000571527	0.0031434	0.00240041	0.000400069	0.000685832	0.000285763	0.000171458	0.000285763	0.000171458	5.71527e-05	0.000114305	5.71527e-05	0.00171458	0.0032577	0.000400069	0	0.00548665	0.00400069	0.00474367	0.000400069	0.0085729	0.00285763	0.000457221	0.000171458	0.00114305
Otu00101	Bacteria;Firmicutes;Clostridia;Clostridiales;Lachnospiraceae;unclassified_Lachnospiraceae	Firmicutes	Clostridia	Clostridiales	Lachnospiraceae	unclassified_Lachnospiraceae	0.00233691	M03062_107_000000000CBKND_1_1106_23856_24108	0.0112019	0.00683927	0.000600103	0.000714408	0.00176221	0.00280048	0.0345202	0.000285763	0.00251472	0.00588672	0.00474367	0.0192604	0.00331485	0.00565811	0.0042293	0.023204	0.00251472	0.00211465	5.71527e-05	0.000342916	0.000171458	0.00182888	0.000228611	0.000171458	0.000171458	0.000571527	0.00308624	5.71527e-05	5.71527e-05	0.00508659	0.00297194	0.00171458	0.000342916	0.000400069	0.00903012	5.71527e-05	0.000171458	0.00194319
Otu00102	Bacteria;Bacteroidetes;Bacteroidia;Bacteroidales;Prevotellaceae;Alloprevotella	Bacteroidetes	Bacteroidia	Bacteroidales	Prevotellaceae	Alloprevotella	0.00232058	M06047_81_000000000CBLT5_1_2109_18896_23154	0.00189556	0.00414357	0.000200034	0.00278143	0.00147644	0.000971595	0.000114305	0.00194319	0.00240041	0.00171458	0.00171458	0.00348631	0.000285763	0.000285763	0.0195462	0.00274333	0.00120021	0.000800137	5.71527e-05	0.000742985	0	0	0	5.71527e-05	0.00782991	0.000228611	0.000342916	0.00822998	0.000914442	0.000742985	0.000285763	0.000228611	0.00628679	0.000400069	0.000114305	0.000342916	0.00337201	5.71527e-05
Otu00103	Bacteria;Firmicutes;Clostridia;Clostridiales;Lachnospiraceae;unclassified_Lachnospiraceae	Firmicutes	Clostridia	Clostridiales	Lachnospiraceae	unclassified_Lachnospiraceae	0.00231786	M06047_81_000000000CBLT5_1_1103_21030_16352	0.00345774	0.00425787	0.00117163	0.00216228	0.00236231	0.00345774	0.000285763	0.00211465	0.000228611	0.00337201	0.0110305	0.00371492	0.000514374	0.00234326	0.0032577	0.0171458	0.000400069	0.00188604	0.000514374	0.00182888	0.00177173	0.000571527	0	0.000171458	0.000171458	0.000171458	0.00274333	0.00971595	0.000171458	0.000285763	0.00240041	0.000285763	0.000457221	0.0105732	0.000571527	0.00394353	0.000914442	0.00840144
Otu00104	Bacteria;Firmicutes;Clostridia;Clostridiales;Ruminococcaceae;unclassified_Ruminococcaceae	Firmicutes	Clostridia	Clostridiales	Ruminococcaceae	unclassified_Ruminococcaceae	0.00230334	M06047_81_000000000CBLT5_1_2110_20953_16290	0.000600103	0.000142882	0.000214322	0.000476272	0.00188604	0.000828713	0	0.00137166	0.000228611	0.000114305	0.00165743	0.000228611	0.000171458	0.000114305	5.71527e-05	5.71527e-05	0.000285763	0.000171458	0.000571527	0.000285763	0	0	0	0	0.000685832	0.000228611	0.000400069	0.00154312	0.000114305	0	0.000171458	0.000228611	0.00782991	0.00297194	0.000114305	0.000742985	0.00245756	0
Otu00105	Bacteria;Firmicutes;Clostridia;Clostridiales;unclassified_Clostridiales;	Firmicutes	Clostridia	Clostridiales	unclassified_Clostridiales		0.00229518	M06047_81_000000000CBLT5_1_1111_3271_10152	0.0038578	0.00284811	0.00485798	0.000266712	0.001124	0.00287192	0.0065154	0.00154312	0.00251472	0.00508659	0.00537235	0.00211465	0.00137166	0.00148597	0.0032577	0.00291479	0.00771561	0.000342916	0.0020575	0.000457221	0.000571527	0.0163457	0.000171458	0.000171458	5.71527e-05	0.000171458	0.000971595	5.71527e-05	0	0.00200034	0.00160027	0.000114305	0.00171458	0.00131451	0.00262902	0.00142882	0.00228611	0.00514374
Otu00106	Bacteria;Firmicutes;Clostridia;Clostridiales;Ruminococcaceae;unclassified_Ruminococcaceae	Firmicutes	Clostridia	Clostridiales	Ruminococcaceae	unclassified_Ruminococcaceae	0.00228701	M06047_81_000000000CBLT5_1_2110_18608_11253	0.00216228	0.0021337	0.00128593	0.00466747	0.00159075	0.00175744	0.00285763	0.00200034	0.00222895	0.00154312	0.0021718	0.0021718	0.00240041	0.00114305	0.00297194	0.0031434	0.00131451	0.00182888	0.000400069	0.00182888	0.00137166	0.00154312	0.00908727	0.00320055	0.00508659	0.00257187	0.00102875	0.00702978	0.00142882	0.00211465	0.00085729	0.00114305	0.00085729	0.0031434	0.00120021	0.00120021	0.00142882	0.00320055
Otu00107	Bacteria;Firmicutes;Clostridia;Clostridiales;Lachnospiraceae;unclassified_Lachnospiraceae	Firmicutes	Clostridia	Clostridiales	Lachnospiraceae	unclassified_Lachnospiraceae	0.00226252	M06047_81_000000000CBLT5_1_2104_5403_14863	0.00266712	0.000457221	0.000414357	0.00237184	0.0070774	0.00595816	0.00560096	0.00457221	0.00148597	0.00262902	0.00102875	0.000685832	0.000400069	0.000342916	0.000457221	0.000571527	0.000457221	0.000514374	0.0010859	5.71527e-05	0.000228611	0.000285763	0.00548665	0.000400069	5.71527e-05	0.000514374	0.0064011	0.00137166	0.000800137	0.000400069	0.00462937	0.0021718	0.0283477	0.00611533	0.000228611	0.0137166	0.00983026	5.71527e-05
Otu00108	Bacteria;Bacteroidetes;Bacteroidia;Bacteroidales;Rikenellaceae;Alistipes	Bacteroidetes	Bacteroidia	Bacteroidales	Rikenellaceae	Alistipes	0.00226071	M06047_81_000000000CBLT5_1_2105_6518_20505	0.00120021	0.00185746	0.00134309	0.00349584	0.00185746	0.00235755	0.000114305	0.000514374	0.000914442	0.000285763	0.00257187	0.00280048	0.0020575	0.00360062	0.00291479	0.00171458	0.000742985	0.000114305	0.000342916	0.000228611	0.00451506	0.000285763	0.00417214	0.00662971	0.00354346	0.000742985	0.00194319	0.00394353	0.000685832	0.000800137	0.00142882	0.000228611	0.00154312	0.00645825	0.000400069	0.00337201	0.00502943	0.000628679
Otu00109	Bacteria;Firmicutes;Clostridia;Clostridiales;unclassified_Clostridiales;	Firmicutes	Clostridia	Clostridiales	unclassified_Clostridiales		0.002209	M06047_81_000000000CBLT5_1_2116_9471_21342	0.00215275	0.00330533	0.00344345	0.00184794	0.00118115	0.00171458	0.00251472	0.000285763	0.00137166	0.00160027	0.00280048	0.0043436	0.0065154	0.000685832	0.00348631	0.00411499	0.00348631	0.00154312	0.0130308	0.000171458	0.000342916	0.000228611	0.000800137	5.71527e-05	0.00611533	0.00371492	0.000342916	5.71527e-05	0	0.00262902	0.000514374	0.000114305	0.00177173	0.0020575	0.00445791	0.00171458	0.000285763	0.000400069
Otu00110	Bacteria;Firmicutes;Erysipelotrichia;Erysipelotrichales;Erysipelotrichaceae;Allobaculum	Firmicutes	Erysipelotrichia	Erysipelotrichales	Erysipelotrichaceae	Allobaculum	0.00219267	M06047_81_000000000CBLT5_1_1103_3237_16337	0.00054295	8.5729e-05	0.0148311	0.00492465	0.000123831	0.000171458	0.000571527	0.000342916	0.000228611	0.000228611	0.00154312	0.000342916	0	0.000114305	0.000114305	0	5.71527e-05	0.000228611	0.0376636	0.0208607	0.000285763	0.000514374	5.71527e-05	0	0.000342916	0.027719	0.000114305	0.00131451	0	0.000571527	5.71527e-05	5.71527e-05	5.71527e-05	0	0.000342916	0.000228611	5.71527e-05	5.71527e-05
Otu00111	Bacteria;Firmicutes;Clostridia;Clostridiales;Lachnospiraceae;unclassified_Lachnospiraceae	Firmicutes	Clostridia	Clostridiales	Lachnospiraceae	unclassified_Lachnospiraceae	0.00214549	M06047_81_000000000CBLT5_1_1106_16534_17393	0.00194319	0.000838239	0.000342916	0.00192414	0.00508659	0.00238612	0.0010859	0.0043436	0.000514374	0.000285763	0.00274333	0.00268617	0.00125736	0.00165743	0.000114305	0.000400069	0.00131451	0.000285763	0.000457221	0.000400069	0.000514374	0	0.000457221	0.000285763	0.000971595	0.00177173	0.00462937	0.00342916	0.000171458	0.000685832	0.0054295	0.000800137	0.0210322	0.00240041	0.000457221	0.00245756	0.00600103	0.000628679
Otu00112	Bacteria;Firmicutes;unclassified_Firmicutes;;;	Firmicutes	unclassified_Firmicutes				0.00212191	C70117_71_000000000C45C2_1_2108_12114_23652	0.00317197	0.00489608	0.000371492	0.0010859	0.00120973	0.00221467	0.00171458	0.00085729	0.00257187	0.0126307	0.00102875	0.000228611	0.000800137	0.00840144	0.00611533	0.00720123	0.00600103	0.00085729	0.000400069	0.000628679	5.71527e-05	0.000400069	0.000228611	0.000400069	0.000171458	0.00262902	0.00302909	5.71527e-05	0.000114305	0.000400069	0.00377208	0.00257187	0.000285763	0.000114305	0.00880151	0	5.71527e-05	0
Otu00113	Bacteria;Firmicutes;unclassified_Firmicutes;;;	Firmicutes	unclassified_Firmicutes				0.00208743	M06047_81_000000000CBLT5_1_1102_6087_15637	0.0015717	0.000552476	0.000185746	0.000161933	0.000409594	0.000428645	0.00840144	0.000285763	5.71527e-05	0	0.000628679	5.71527e-05	0	0.000742985	0.000628679	0.000742985	0.0010859	0.000114305	0.000742985	0	0	0	0	5.71527e-05	5.71527e-05	5.71527e-05	0.000800137	0	0	0.000971595	0.00125736	0	0.000114305	0.000114305	0.000400069	0.00114305	0.000114305	5.71527e-05
Otu00114	Bacteria;Firmicutes;Clostridia;Clostridiales;Lachnospiraceae;unclassified_Lachnospiraceae	Firmicutes	Clostridia	Clostridiales	Lachnospiraceae	unclassified_Lachnospiraceae	0.00206838	C70117_71_000000000C45C2_1_1102_11601_17314	0.00278143	0.00043817	0.000114305	0.00140977	0.00341011	0.0029005	0.000171458	0.0107447	0.000171458	0.000971595	0.00348631	0.00114305	0.000800137	0.000114305	0.000285763	0.000400069	0.000171458	0.00085729	0.000228611	0.000228611	0	0	0.000400069	0.000228611	0.000400069	0.00131451	0.00537235	0.000742985	0.000114305	0.000571527	0.00702978	0.000171458	0.0110876	0.00148597	0	0.00805852	0.00337201	0.000171458
Otu00115	Bacteria;Firmicutes;unclassified_Firmicutes;;;	Firmicutes	unclassified_Firmicutes				0.00206566	C70117_71_000000000C45C2_1_2105_22053_14666	0.00431503	0.000228611	0.000571527	0.00054295	0.00172411	0.000785849	0.00588672	0.000800137	0.00588672	0.00628679	0.000742985	0.00628679	5.71527e-05	0.0010859	0	5.71527e-05	0.000171458	0	0.0021718	0	0.000114305	0	5.71527e-05	0.000285763	0	0.000114305	0.00268617	0.000114305	0	0.00131451	0.00400069	0	0.000114305	0.00491513	0.000228611	0.00240041	0.000171458	0.000342916
Otu00116	Bacteria;Firmicutes;Clostridia;Clostridiales;Ruminococcaceae;Faecalibacterium	Firmicutes	Clostridia	Clostridiales	Ruminococcaceae	Faecalibacterium	0.00203119	M03062_107_000000000CBKND_1_2106_23456_9400	0.00283858	0.00362919	0.00384352	0.000428645	0.00244804	0.00110019	0	0.0133166	5.71527e-05	0.000514374	0.00291479	0.000228611	5.71527e-05	0.00120021	0.00102875	0.00171458	0.0177745	0	0.0031434	0.00834429	0.00382923	5.71527e-05	0.00251472	5.71527e-05	0	0	0	0	0.000571527	5.71527e-05	0	0.0140596	0	0	0.000171458	0	0	0.0042293
Otu00117	Bacteria;Firmicutes;Clostridia;Clostridiales;Ruminococcaceae;unclassified_Ruminococcaceae	Firmicutes	Clostridia	Clostridiales	Ruminococcaceae	unclassified_Ruminococcaceae	0.00201032	M06047_81_000000000CBLT5_1_1103_16190_14273	0.000733459	0.00678212	0.0088158	0.000276238	0.0031434	0.00261473	0.000400069	0.000285763	0.0021718	0.000228611	0.00114305	0.000171458	0.0031434	0.00394353	0.0106875	0.00817283	0.00274333	0.0120021	0.000971595	0.0169172	0.000800137	0.0165743	0	0	0	0.00160027	5.71527e-05	0	0.00948734	0.00634394	0	0.00302909	0	0	0.0104018	0	0	5.71527e-05
Otu00118	Bacteria;Firmicutes;Clostridia;Clostridiales;Lachnospiraceae;unclassified_Lachnospiraceae	Firmicutes	Clostridia	Clostridiales	Lachnospiraceae	unclassified_Lachnospiraceae	0.00198674	M06047_81_000000000CBLT5_1_2117_11203_19729	0.00107637	0.000342916	0.000257187	0.00332438	0.00367682	0.00460079	0.000571527	0.00085729	0.000342916	0.00142882	0.00171458	0.00154312	0.00102875	0.000285763	5.71527e-05	0.000457221	0.000114305	0.000114305	0.000342916	0.000114305	0.000171458	0.000400069	0.00365777	0.000971595	0.00142882	0.00131451	0.00485798	0.00771561	0	5.71527e-05	0.00417214	0.000171458	0.00445791	0.0132023	0.000114305	0.00897297	0.00771561	0.00160027
Otu00119	Bacteria;Firmicutes;Bacilli;Lactobacillales;Lactobacillaceae;Lactobacillus	Firmicutes	Bacilli	Lactobacillales	Lactobacillaceae	Lactobacillus	0.00198038	M06047_81_000000000CBLT5_1_1101_15740_18858	0.00237184	0.00290526	0.00280048	0.000285763	0.00110495	0.00127165	0.000457221	0.000914442	0.00251472	0.00617249	0.00337201	0.000800137	0.00863005	0.00274333	0.00194319	0.00262902	0.00085729	0.000628679	0.0106875	0.000285763	0.000114305	0.000114305	0.000228611	0.000114305	0	0.000971595	0.000171458	0.000228611	0.000171458	0.00445791	0.000171458	0.00148597	0.000114305	0.000228611	0.000228611	0.000800137	0	0.00405784
Otu00120	Bacteria;Firmicutes;Clostridia;Clostridiales;Ruminococcaceae;Ruminococcus	Firmicutes	Clostridia	Clostridiales	Ruminococcaceae	Ruminococcus	0.00196133	M06047_81_000000000CBLT5_1_2113_20043_3141	0.00566764	0.00375302	0.000400069	0.000295289	0.000581052	0.000142882	0.000457221	0.00291479	0.0154884	0.0132594	0.00102875	0.00085729	0.000628679	0.0126879	0.00285763	0.00137166	0.00360062	0.00137166	0	0	0	0.00160027	0.000228611	0.000514374	0.000114305	0.000685832	0.000114305	0.000114305	0.000114305	0.000742985	0.000171458	0.000114305	5.71527e-05	0.00228611	0	0.000285763	0.000228611	5.71527e-05
Otu00121	Bacteria;Firmicutes;Clostridia;Clostridiales;unclassified_Clostridiales;	Firmicutes	Clostridia	Clostridiales	unclassified_Clostridiales		0.00193684	C70117_71_000000000C45C2_1_1108_20815_7787	0.00227658	0.000581052	0.000242899	0.000276238	0.000533425	0.000500086	0.00200034	0.00268617	0.00085729	0.000971595	0.00177173	0.00537235	0.00120021	0.000514374	0.000228611	0.000457221	0.000971595	0.000114305	0.000685832	5.71527e-05	0.000228611	0	0	0	0.000114305	0.00102875	0.000457221	5.71527e-05	0.000114305	0.000228611	0.000285763	0	0.000971595	0.00160027	0.000400069	0.000171458	0.000742985	0.000685832
Otu00122	Bacteria;Bacteroidetes;Bacteroidia;Bacteroidales;Bacteroidaceae;Bacteroides	Bacteroidetes	Bacteroidia	Bacteroidales	Bacteroidaceae	Bacteroides	0.001906	M03062_107_000000000CBKND_1_2101_8164_18854	0.000781086	0.00133356	0.000471509	0.00689642	0.00782991	0.00164314	0.000228611	0.000342916	0.00085729	0.00125736	0.00154312	0.000457221	0.00085729	0.00114305	0.00177173	0.00171458	0.00182888	0.000685832	0.000285763	0.000800137	0	0.000800137	0.00222895	0.00297194	0.0312625	0.00405784	0.000342916	0.000514374	0.0234326	0.0010859	0.000285763	0.0215466	0.000457221	0.000171458	0.00160027	5.71527e-05	0	0.00491513
Otu00123	Bacteria;Firmicutes;Clostridia;Clostridiales;Lachnospiraceae;unclassified_Lachnospiraceae	Firmicutes	Clostridia	Clostridiales	Lachnospiraceae	unclassified_Lachnospiraceae	0.00187878	M06047_81_000000000CBLT5_1_1118_11468_9185	0.00401021	0.000733459	0.00114305	0.000180983	0.00301957	0.00495799	0.000285763	0.0105161	0.000228611	5.71527e-05	0.00171458	0.0112591	0.00177173	0.000171458	0.000400069	0.00165743	0.000114305	0.000285763	0.00354346	0.000171458	0.000571527	0.000285763	0	0	0.000285763	0.000514374	0.000114305	0.000171458	0.00388638	0.0137738	0	0.000342916	5.71527e-05	5.71527e-05	0.0132023	0	0.000285763	0.00634394
Otu00124	Bacteria;Bacteroidetes;Bacteroidia;Bacteroidales;Porphyromonadaceae;unclassified_Porphyromonadaceae	Bacteroidetes	Bacteroidia	Bacteroidales	Porphyromonadaceae	unclassified_Porphyromonadaceae	0.00187697	M06047_81_000000000CBLT5_1_2116_7405_10873	0.00127641	0.000504848	0.000442933	0.00456269	0.000590577	0.000728696	0.000742985	0.00125736	0.00297194	0.000800137	0.0010859	0.000800137	0.00120021	0.000571527	0.000571527	0.000285763	0.000228611	0.000171458	0.00102875	5.71527e-05	0.000685832	0	0.012345	0.0101732	0.000914442	0.000457221	0.000228611	0.0032577	0.000171458	0.000285763	0.000457221	5.71527e-05	0.00200034	0.000571527	0.000400069	0.000971595	0.00125736	0.000285763
Otu00125	Bacteria;Bacteroidetes;Bacteroidia;Bacteroidales;Bacteroidaceae;Bacteroides	Bacteroidetes	Bacteroidia	Bacteroidales	Bacteroidaceae	Bacteroides	0.00186608	C70117_71_000000000C45C2_1_2105_14279_15771	0.000200034	0.000180983	0.00904441	0.00621059	0.000123831	0.00517232	0	0.000228611	0.000171458	0.000114305	0.000685832	0	0	0.000114305	0	0	0.000685832	0.000285763	0.000285763	0.00417214	0.0314911	0.000228611	0.01646	0.0198891	0	0.000914442	0	0	0.000400069	0.000171458	0	0.000171458	0	0	0.000285763	0	0	0.0204035
Otu00126	Bacteria;Firmicutes;Clostridia;Clostridiales;Eubacteriaceae;Eubacterium	Firmicutes	Clostridia	Clostridiales	Eubacteriaceae	Eubacterium	0.00186336	C70117_71_000000000C45C2_1_1118_3468_10691	0.000161933	4.76272e-05	1.42882e-05	0.000123831	7.62035e-05	0.00015717	0	0.000114305	0	0	0.000628679	0.000228611	5.71527e-05	0	0	0	0.000228611	0	0	0	5.71527e-05	0	5.71527e-05	5.71527e-05	0.000514374	0	5.71527e-05	5.71527e-05	0	0	0	0.000114305	0.000114305	0.000228611	0.000228611	5.71527e-05	5.71527e-05	0.000285763
Otu00127	Bacteria;Firmicutes;Clostridia;Clostridiales;unclassified_Clostridiales;	Firmicutes	Clostridia	Clostridiales	unclassified_Clostridiales		0.00185882	M06047_81_000000000CBLT5_1_1108_20304_10776	0.00623916	0.000904917	0.00115734	0.000276238	0.001124	0.000600103	0	0.000628679	0.00120021	0.034063	0.0010859	0.000457221	0.00251472	0.000742985	0.00131451	0.000742985	5.71527e-05	5.71527e-05	0.00337201	0.000514374	0.000514374	0.000228611	0.000514374	5.71527e-05	5.71527e-05	0.000400069	0.000514374	0.000114305	0.000628679	0.00525804	0.000514374	0	5.71527e-05	0.000285763	0.00114305	0.00114305	0	0.000114305
Otu00128	Bacteria;Firmicutes;Clostridia;Clostridiales;Ruminococcaceae;unclassified_Ruminococcaceae	Firmicutes	Clostridia	Clostridiales	Ruminococcaceae	unclassified_Ruminococcaceae	0.00185519	M06047_81_000000000CBLT5_1_2103_4269_13109	0.00245756	0.000257187	0.000485798	0.00150502	0.00262902	0.00528662	0.00188604	0.00280048	0.00360062	0.0021718	0.00331485	0.000971595	0.000285763	0.000342916	0.000114305	0.000228611	0.000285763	0.000285763	0.00125736	0.000457221	0.000171458	5.71527e-05	0.000228611	5.71527e-05	0.00142882	0.000628679	0.00297194	0.00371492	5.71527e-05	0.00102875	0.00302909	0.000228611	0.00131451	0.010116	0.000457221	0.0054295	0.0146311	0.000628679
Otu00129	Bacteria;Bacteroidetes;Bacteroidia;Bacteroidales;Rikenellaceae;Alistipes	Bacteroidetes	Bacteroidia	Bacteroidales	Rikenellaceae	Alistipes	0.0017554	C70117_71_000000000C45C2_1_1112_20068_23778	0.00110495	0.00679164	0.00105732	0.000866815	0.000562001	0.000471509	0.00228611	0.000228611	0.00131451	0.00102875	0.00085729	0.000914442	0.00525804	0.0168029	0.012345	0.00354346	0.00194319	0.00085729	0.00160027	0.000914442	0	0.00171458	0.000457221	0.000285763	0.00154312	0.000228611	0.0010859	0.00160027	0.000742985	0.0010859	0.000400069	0.000285763	0.00085729	0	0.00148597	0.000114305	0	0.000285763
Otu00130	Bacteria;Bacteroidetes;Bacteroidia;Bacteroidales;Porphyromonadaceae;unclassified_Porphyromonadaceae	Bacteroidetes	Bacteroidia	Bacteroidales	Porphyromonadaceae	unclassified_Porphyromonadaceae	0.0017554	M06047_81_000000000CBLT5_1_2117_17259_18331	0.00162885	0.00123831	0.000885866	0.00317197	0.000943019	0.000985883	0.0010859	0.000685832	0.00165743	0.00137166	0.00211465	0.00285763	0.00280048	0.00137166	0.000971595	0.00125736	0.000514374	0.000514374	0.00125736	0.000914442	0.000742985	0.000628679	0.00400069	0.00177173	0.0054295	0.00497228	0.000457221	0.00240041	0.00211465	0.000914442	0.000457221	0.000457221	0.000685832	0.00102875	0.00160027	0.00085729	0.000685832	0.000800137
Otu00131	Bacteria;Firmicutes;Clostridia;Clostridiales;Lachnospiraceae;Lachnospiracea_incertae_sedis	Firmicutes	Clostridia	Clostridiales	Lachnospiraceae	Lachnospiracea_incertae_sedis	0.00170914	M06047_81_000000000CBLT5_1_2108_18042_3023	0.00212417	0.00033339	0.000114305	0.00290526	0.00302909	0.00152883	5.71527e-05	0.00960165	0.0010859	0.000628679	0.00125736	0.000114305	0.000742985	0.000171458	0.000285763	0.000514374	5.71527e-05	0.000228611	0.000171458	0.000171458	5.71527e-05	5.71527e-05	0	0.000171458	5.71527e-05	0.000171458	0.0168029	0.000228611	0	0.000114305	0.0169172	0.000114305	0.000571527	0.000457221	0.00234326	0.000742985	0.00302909	0
Otu00132	Bacteria;Bacteroidetes;Bacteroidia;Bacteroidales;Rikenellaceae;Alistipes	Bacteroidetes	Bacteroidia	Bacteroidales	Rikenellaceae	Alistipes	0.0017046	M06047_81_000000000CBLT5_1_2119_10365_2939	0.00167648	0.00310529	0.000628679	0.00381018	0.00109543	0.00214322	0.00137166	0.000800137	0.0021718	0.00274333	0.00131451	0.00165743	0.00685832	0.00777276	0.00165743	0.0010859	0.00085729	0.000400069	0.00160027	0.000228611	0.000171458	0.000514374	0.00622964	0.00662971	0.00142882	0.00194319	0.00120021	0.0054295	0.000457221	0.00194319	0.000800137	0.000342916	0.00228611	0.000742985	0.00440075	0.00131451	0.00222895	0.000628679
Otu00133	Bacteria;Bacteroidetes;Bacteroidia;Bacteroidales;Porphyromonadaceae;Barnesiella	Bacteroidetes	Bacteroidia	Bacteroidales	Porphyromonadaceae	Barnesiella	0.00169281	M06047_81_000000000CBLT5_1_1118_20339_24624	0.00155265	0.0011621	0.000657256	0.00407689	0.000809663	0.00162885	0.00171458	0.000628679	0.00222895	0.00188604	0.000971595	0.00188604	0.00114305	0.00182888	0.00211465	0.00142882	0.000114305	0.000342916	0.00102875	0.000628679	0.000685832	0.000285763	0.00354346	0.00662971	0.00725839	0.00171458	0.00171458	0.00360062	0.000228611	0.00085729	0.000971595	0.000114305	0.00200034	0.000685832	0.00120021	0.00125736	0.000342916	0.00371492
Otu00134	Bacteria;Firmicutes;Clostridia;Clostridiales;Lachnospiraceae;unclassified_Lachnospiraceae	Firmicutes	Clostridia	Clostridiales	Lachnospiraceae	unclassified_Lachnospiraceae	0.00168736	M06047_81_000000000CBLT5_1_1102_6432_13803	0.00138119	0.000152407	0.000557238	0.000123831	0.000238136	0.00247185	0	5.71527e-05	0.00142882	0	0.00662971	0.000171458	0.000285763	0	5.71527e-05	0.000285763	0.000228611	5.71527e-05	0.00182888	0	0.000342916	5.71527e-05	0	0	5.71527e-05	0.000114305	0.000171458	0.000400069	0	0.000114305	0.000228611	0.000571527	0.000114305	0.000400069	0.000800137	0.00891581	0.000171458	0
Otu00135	Bacteria;Proteobacteria;Deltaproteobacteria;Desulfovibrionales;Desulfovibrionaceae;Desulfovibrio	Proteobacteria	Deltaproteobacteria	Desulfovibrionales	Desulfovibrionaceae	Desulfovibrio	0.00164745	M06047_81_000000000CBLT5_1_2107_19792_19107	0.00317197	0.000381018	1.42882e-05	0.000466747	0.0015717	0.00337201	0.000742985	0.00691547	0.000400069	0.000342916	0.00405784	0.00657256	0.000285763	0.000971595	0.000171458	0.000457221	0.000228611	0.000171458	0	0	5.71527e-05	0	0.000171458	0	0.000285763	0.000114305	0.00211465	0.000114305	0	0.00120021	0.00228611	0	0.00405784	0.00188604	0.00291479	0.00348631	0.00582957	0.00125736
Otu00136	Bacteria;Bacteroidetes;Bacteroidia;Bacteroidales;Rikenellaceae;Alistipes	Bacteroidetes	Bacteroidia	Bacteroidales	Rikenellaceae	Alistipes	0.00160753	M06047_81_000000000CBLT5_1_2111_18561_24873	0.00220038	0.000257187	4.28645e-05	0.00156217	0.00260045	0.000414357	0.000171458	0.00182888	0.00188604	0.00411499	0.00262902	0.00257187	0.000742985	0	0.000171458	0.000114305	0	0.000514374	0.000114305	5.71527e-05	0	0	5.71527e-05	0.000114305	0.00794422	0.000285763	0.000171458	0.000800137	0	0.000457221	0.000114305	0.000114305	0.000228611	0.0146882	5.71527e-05	0.000342916	0.00125736	0
Otu00137	Bacteria;Firmicutes;Clostridia;Clostridiales;Lachnospiraceae;unclassified_Lachnospiraceae	Firmicutes	Clostridia	Clostridiales	Lachnospiraceae	unclassified_Lachnospiraceae	0.0015912	M06047_81_000000000CBLT5_1_1117_10163_6477	0.00266712	0.000323865	7.14408e-05	0.00020956	0.000419119	0.000514374	0.00988741	0.00120021	5.71527e-05	5.71527e-05	0.00234326	0.00245756	0.00120021	5.71527e-05	5.71527e-05	0.000228611	0.000285763	0.000114305	0.000114305	5.71527e-05	5.71527e-05	5.71527e-05	0.000457221	0.000228611	0.000171458	0.000171458	5.71527e-05	0.000171458	0.000171458	0.000171458	0.000457221	0.000285763	0.000400069	0.00102875	0.000171458	0.00102875	0.000400069	0.000457221
Otu00138	Bacteria;Firmicutes;Clostridia;Clostridiales;Lachnospiraceae;unclassified_Lachnospiraceae	Firmicutes	Clostridia	Clostridiales	Lachnospiraceae	unclassified_Lachnospiraceae	0.00158757	M06047_81_000000000CBLT5_1_1101_13779_5830	0.00322912	0.000323865	0.000257187	0.00321007	0.00236231	0.00310053	5.71527e-05	0.0178316	0.000628679	0.000114305	0.000228611	0.000514374	0.000171458	5.71527e-05	0.000628679	5.71527e-05	0.000571527	0.000457221	0.000971595	5.71527e-05	0	0	0.000171458	0.000171458	5.71527e-05	0.000285763	0.0180602	0.000514374	0	0.000628679	0.0112591	0.000114305	0.000800137	0.00137166	5.71527e-05	0.0106304	0.00171458	0
Otu00139	Bacteria;Bacteroidetes;Bacteroidia;Bacteroidales;Porphyromonadaceae;Barnesiella	Bacteroidetes	Bacteroidia	Bacteroidales	Porphyromonadaceae	Barnesiella	0.00155673	M06047_81_000000000CBLT5_1_2115_20886_11610	0.00142882	0.0016479	0.00160027	0.0026957	0.00250519	0.00272904	0.00137166	0.000171458	0.00285763	0.000457221	0.00194319	0.00177173	0.000685832	0.00285763	0.000742985	0.00211465	0.00120021	0.00228611	0.00240041	0.000628679	0.000971595	0.00240041	0.00245756	0.000571527	0.00520089	0.00668686	0.000571527	0.000685832	0.000628679	0.0125736	0.000285763	0.000228611	0.000914442	0.000400069	0.00805852	0.000457221	0.000285763	0.00211465
Otu00140	Bacteria;Bacteroidetes;Bacteroidia;Bacteroidales;Prevotellaceae;Alloprevotella	Bacteroidetes	Bacteroidia	Bacteroidales	Prevotellaceae	Alloprevotella	0.00153405	M03062_107_000000000CBKND_1_2103_18506_6406	0.00332438	0.00444838	0.000671544	0.00281953	0.000495323	0.000171458	0.0138309	0.00120021	0.00131451	0.000228611	0.00320055	0.000171458	0.0134309	0.00554381	0.00120021	0.0042293	0.000342916	0.00194319	0.000571527	0.000114305	0.00137166	0.000628679	0.000342916	0	0	0.0165743	0	0	0.000114305	0.0020575	0	0.000800137	0	0	0.000400069	0.000171458	0	0.000114305
Otu00141	Bacteria;Bacteroidetes;Bacteroidia;Bacteroidales;unclassified_Bacteroidales;	Bacteroidetes	Bacteroidia	Bacteroidales	unclassified_Bacteroidales		0.00149413	M06047_81_000000000CBLT5_1_2106_5250_13105	0.000685832	0.00155265	0.00210036	0.000876341	0.000609628	0.00100017	0.000400069	0.000514374	0.00102875	0.000685832	0.000514374	0.000971595	0.00268617	0.00297194	0.00251472	0.000685832	0.000228611	0.000228611	0.0064011	0.0010859	0.000457221	0.000457221	0	0.000114305	0.0010859	0.00142882	0.000285763	0.00234326	5.71527e-05	0.000114305	5.71527e-05	0.000400069	0.000171458	0.00285763	0.000628679	0.0021718	0.000971595	0.000228611
Otu00142	Bacteria;Bacteroidetes;Bacteroidia;Bacteroidales;Porphyromonadaceae;unclassified_Porphyromonadaceae	Bacteroidetes	Bacteroidia	Bacteroidales	Porphyromonadaceae	unclassified_Porphyromonadaceae	0.00148234	M06047_81_000000000CBLT5_1_1113_26807_19216	0.00177173	0.00400069	0.0020575	0.00160027	0.00142882	0.00471509	0.0010859	0.0010859	0.00451506	0.00262902	0.000571527	0.000742985	0.00200034	0.00502943	0.00948734	0.00417214	0.00280048	0.000514374	0.00257187	0.000400069	0.000628679	0.00462937	0.000571527	0.000285763	0.00308624	0.000742985	0.00342916	0.00148597	0.000114305	0.0020575	0.00302909	0.000571527	0.00085729	0.00194319	0.00537235	0.00485798	0.00200034	0.00662971
Otu00143	Bacteria;Firmicutes;Clostridia;Clostridiales;Ruminococcaceae;Butyricicoccus	Firmicutes	Clostridia	Clostridiales	Ruminococcaceae	Butyricicoccus	0.00147327	M06047_81_000000000CBLT5_1_1116_28870_17730	0.00167648	0.000476272	8.5729e-05	0.000952544	0.00259092	0.00187175	0.00171458	0.0021718	0.0031434	0.000400069	0.00171458	0.000914442	0.000628679	0.00085729	0.000171458	0.000800137	0.000342916	5.71527e-05	0.000285763	5.71527e-05	0	0	0	0.000171458	0.000400069	0.000571527	0.00400069	0.000571527	0	0.000342916	0.00222895	0.000285763	0.0105161	0.0021718	0.000914442	0.00245756	0.00382923	0.000285763
Otu00144	Bacteria;Firmicutes;Clostridia;Clostridiales;unclassified_Clostridiales;	Firmicutes	Clostridia	Clostridiales	unclassified_Clostridiales		0.00147145	M06047_81_000000000CBLT5_1_1105_7741_17691	0.000552476	0.00145739	0.00070012	0.000323865	0.000704883	0.000957307	0.000400069	0.00085729	5.71527e-05	0.000400069	0.00085729	0.000742985	0.00085729	0.00142882	0.00262902	0.00165743	0.00131451	0.00085729	0.00200034	0.000114305	0.000114305	0.000571527	0.000457221	0.000114305	0.000114305	0.000571527	0.000685832	0	0.000628679	0.00131451	0.000342916	0.00085729	0.000171458	0.000914442	0.00154312	0.00160027	0.000228611	0.000457221
Otu00145	Bacteria;Firmicutes;Clostridia;Clostridiales;Lachnospiraceae;Clostridium XlVa	Firmicutes	Clostridia	Clostridiales	Lachnospiraceae	Clostridium XlVa	0.00146783	C70117_71_000000000C45C2_1_2106_8059_16086	0.00248614	0.00115258	0.000357204	0.000923968	0.00117163	0.00221467	0.000171458	0.00714408	0.000171458	0	0.00228611	0.00514374	0.00120021	0.00348631	0.000114305	0.00085729	0.000685832	0.000571527	0.000742985	0.000514374	0.000171458	0	0	0	5.71527e-05	0.00411499	0.00120021	0.000171458	0.000285763	0.00377208	0.0010859	0.000342916	0.000457221	0.0010859	0.000342916	0.00165743	0.00262902	0.0042293
Otu00146	Bacteria;Firmicutes;Clostridia;Clostridiales;Lachnospiraceae;unclassified_Lachnospiraceae	Firmicutes	Clostridia	Clostridiales	Lachnospiraceae	unclassified_Lachnospiraceae	0.00146692	M06047_81_000000000CBLT5_1_1107_8760_24349	0.00113353	0.00166695	0.000414357	0.000847764	0.00064773	0.00147168	0.000228611	0.00137166	0.00142882	0	0.00285763	0.000914442	0.00548665	0.000171458	0.00137166	0.00160027	0.000971595	0.000400069	0.000457221	0.000400069	0.000800137	0	0	5.71527e-05	0.000285763	0.00291479	0.000228611	0.00160027	0.000457221	0.000800137	0.000685832	0.00120021	5.71527e-05	0.000685832	0.00125736	0	0.000285763	0.0043436
Otu00147	Bacteria;Bacteroidetes;Bacteroidia;Bacteroidales;Prevotellaceae;Prevotella	Bacteroidetes	Bacteroidia	Bacteroidales	Prevotellaceae	Prevotella	0.00145422	C70117_71_000000000C45C2_1_2104_5410_8624	5.71527e-05	0.000428645	0.000528662	0.000342916	0.00033339	0.00124307	5.71527e-05	0.000114305	0	5.71527e-05	5.71527e-05	5.71527e-05	0.00102875	0.000571527	5.71527e-05	0	0.000514374	0.000400069	0.000342916	0.000800137	0.000400069	0.000571527	0	0.000171458	0.000171458	0.00085729	0.000800137	5.71527e-05	0	0	0.00160027	0.000342916	5.71527e-05	0	0.000400069	0.00445791	0.000114305	0
Otu00148	Bacteria;Firmicutes;Clostridia;Clostridiales;unclassified_Clostridiales;	Firmicutes	Clostridia	Clostridiales	unclassified_Clostridiales		0.00143426	M06047_81_000000000CBLT5_1_1102_15624_18808	0.000590577	0.00371492	0.00118592	0.00102875	0.00180031	0.00121449	0.000228611	0.00171458	0	0	0.000342916	0.00125736	0.000457221	0.00245756	0.0100589	0.00725839	0.00182888	0.000228611	0.00440075	0.000114305	0.000171458	5.71527e-05	5.71527e-05	5.71527e-05	0.000114305	0	0.00582957	0.000114305	0.000114305	0.00114305	0.00914442	0	5.71527e-05	0.000342916	0.00394353	0.000228611	0.000114305	0.000571527
Otu00149	Bacteria;Firmicutes;Clostridia;Clostridiales;unclassified_Clostridiales;	Firmicutes	Clostridia	Clostridiales	unclassified_Clostridiales		0.00141067	M06047_81_000000000CBLT5_1_1101_7878_4629	0.00124783	0.00010478	0.000657256	0.000638205	0.00020956	0.000514374	0.000800137	0.000971595	0.000685832	0.000171458	0.000800137	0.00405784	0	0.000171458	5.71527e-05	0.000171458	0.000228611	0	0.00160027	0.000171458	0.000228611	0.000628679	5.71527e-05	0	5.71527e-05	0.00342916	0.000228611	5.71527e-05	0	0.000514374	0.000400069	0.000228611	5.71527e-05	5.71527e-05	0.000514374	0.00120021	0.000342916	0
Otu00150	Bacteria;Bacteroidetes;Bacteroidia;Bacteroidales;Bacteroidaceae;Bacteroides	Bacteroidetes	Bacteroidia	Bacteroidales	Bacteroidaceae	Bacteroides	0.00139979	C70117_71_000000000C45C2_1_2105_20009_6403	0.001124	0.000676306	0.00107161	0.00485798	0.00129546	0.00110019	0.00160027	0.000514374	0.00348631	5.71527e-05	0.000457221	0.000628679	0.000228611	0.00148597	0.000971595	0.00085729	0.000228611	0.000285763	0.000685832	0.00137166	0	0.00222895	0.000571527	0.000457221	0.0157741	0.00657256	0.00331485	0.00245756	0.000514374	0.000800137	0.00342916	0.000171458	0.00114305	0.00171458	0.000628679	0.00177173	0.00102875	0.000971595
Otu00151	Bacteria;Firmicutes;Clostridia;Clostridiales;Ruminococcaceae;Ruminococcus	Firmicutes	Clostridia	Clostridiales	Ruminococcaceae	Ruminococcus	0.00139797	C70117_71_000000000C45C2_1_1115_8169_14873	0.00169553	0.00163838	0.00127165	0.00192414	0.00124783	0.00854432	0	0.00280048	0.00417214	0	0.00131451	0.00188604	0.000342916	0.00142882	0.000457221	0.000685832	0.00342916	0.00348631	0	0.0043436	5.71527e-05	0.000685832	0.000114305	0.000171458	0.000628679	0.000171458	0.000628679	0.00983026	0.000228611	0.00297194	0.00085729	0.00211465	0.000685832	0.000628679	0.000571527	0.0196605	0.0139452	0
Otu00152	Bacteria;Firmicutes;Clostridia;Clostridiales;Ruminococcaceae;unclassified_Ruminococcaceae	Firmicutes	Clostridia	Clostridiales	Ruminococcaceae	unclassified_Ruminococcaceae	0.00139706	C70117_71_000000000C45C2_1_2118_2179_16273	0.00115258	0.000361967	0.000500086	0.00127641	0.000733459	0.00455792	0.000514374	0.0021718	0.000914442	0.000685832	0.00125736	0.00137166	0.000800137	5.71527e-05	0.000514374	0.000228611	0.000285763	0.000285763	0.000914442	0.000457221	0.000114305	0.000514374	5.71527e-05	0.000114305	0.00137166	0.000114305	0.0010859	0.00491513	0.000400069	0.000171458	0.000571527	0.000457221	0.00102875	0.00177173	0.000285763	0.00617249	0.0105732	0.00120021
Otu00153	Bacteria;Firmicutes;Clostridia;Clostridiales;unclassified_Clostridiales;	Firmicutes	Clostridia	Clostridiales	unclassified_Clostridiales		0.00135806	M06047_81_000000000CBLT5_1_1106_17108_5644	0.00122878	0.000152407	0.000142882	0.000133356	0.00114305	0.00130022	0.00371492	0.0031434	0.000114305	0	0.000342916	5.71527e-05	0.000114305	0.000114305	5.71527e-05	0.000285763	0.000171458	0.000171458	5.71527e-05	5.71527e-05	0.000285763	0.000171458	0	0	0.000171458	0.000342916	0.000171458	0.000114305	5.71527e-05	0.00342916	5.71527e-05	0	5.71527e-05	0.0032577	0.000228611	0.000114305	0.00480082	5.71527e-05
Otu00154	Bacteria;Firmicutes;Clostridia;Clostridiales;Lachnospiraceae;unclassified_Lachnospiraceae	Firmicutes	Clostridia	Clostridiales	Lachnospiraceae	unclassified_Lachnospiraceae	0.0013381	C70117_71_000000000C45C2_1_2119_22708_14789	0.00043817	0.00460079	0.00245756	0.000152407	0.00229563	0.00031434	0.000457221	0.000628679	0.000914442	0.000171458	0.000228611	0.000228611	0.00177173	0.00280048	0.00154312	0.00142882	0.0121735	0.00788707	0.00160027	0.00291479	0.000228611	0.00508659	0	0	0	0.00085729	5.71527e-05	0	0.00485798	0.0021718	0.000171458	0.0065154	0	5.71527e-05	0.000971595	0	0	0.000285763
Otu00155	Bacteria;Firmicutes;Clostridia;Clostridiales;unclassified_Clostridiales;	Firmicutes	Clostridia	Clostridiales	unclassified_Clostridiales		0.00132721	M03062_107_000000000CBKND_1_1111_13041_23935	0.000133356	0.00491513	0.0125593	0	6.66781e-05	0.00015717	0	0.000685832	0	0	5.71527e-05	5.71527e-05	0.000114305	0.00137166	0.000514374	0.000685832	0.000400069	0.0264045	0.00222895	0.0292622	0.000342916	0.0184032	0	0	0	0	0	0	5.71527e-05	0.000114305	0	0.000228611	0	0	0.000457221	0	0	0.000171458
Otu00156	Bacteria;Bacteroidetes;Bacteroidia;Bacteroidales;Rikenellaceae;Alistipes	Bacteroidetes	Bacteroidia	Bacteroidales	Rikenellaceae	Alistipes	0.00132268	M06047_81_000000000CBLT5_1_1101_27767_10599	0.000847764	0.000495323	0.000557238	0.00285763	0.00167648	0.00110019	0.000457221	5.71527e-05	0.000742985	0	0.00102875	0.00280048	0.000685832	0.000457221	5.71527e-05	0.000285763	0.000971595	0.000514374	0.000571527	0.000628679	0.000114305	0.000914442	0.00274333	0.00331485	0.00280048	0.00331485	0.000342916	0.00462937	0.00211465	0.00354346	0.000742985	0.000571527	0.00222895	0.00085729	0.00165743	0.00131451	0.00137166	5.71527e-05
Otu00157	Bacteria;Firmicutes;Clostridia;Clostridiales;Ruminococcaceae;Ruminococcus	Firmicutes	Clostridia	Clostridiales	Ruminococcaceae	Ruminococcus	0.00131995	M03062_107_000000000CBKND_1_2105_13180_16603	0.00111448	0.0112591	0.00164314	1.90509e-05	0.000190509	0	0	0.000114305	0	0	0.00600103	0.000571527	0.000628679	0.0270904	0.000742985	0.00160027	0.0255472	0.0119449	0	5.71527e-05	0.000114305	0.0064011	0	0	0	0.000114305	0	0	0	0.000685832	0	0.000457221	0	0	0	0	0	0
Otu00158	Bacteria;Firmicutes;Clostridia;Clostridiales;Ruminococcaceae;unclassified_Ruminococcaceae	Firmicutes	Clostridia	Clostridiales	Ruminococcaceae	unclassified_Ruminococcaceae	0.00131814	M06047_81_000000000CBLT5_1_2116_11574_5344	0.00181936	0.00124783	0.000357204	0.000523899	0.000990646	0.00175744	0.000971595	0.00142882	0.00120021	0.00102875	0.00200034	0.00428645	0.00291479	0.00222895	0.000800137	0.000800137	0.000628679	0.000114305	0.000571527	0.000114305	0.000571527	0.000171458	0.000457221	0.000171458	0.000400069	0.000342916	0.000514374	0.00125736	0.000114305	0.000228611	0.000457221	0.000171458	0.000342916	0.00462937	0.000285763	0.000742985	0.00382923	0.0021718
Otu00159	Bacteria;Actinobacteria;Actinobacteria;Actinomycetales;Micrococcaceae;Rothia	Actinobacteria	Actinobacteria	Actinomycetales	Micrococcaceae	Rothia	0.00131088	C70117_71_000000000C45C2_1_2101_14530_16861	0.00085729	0.000495323	0.000843002	0.00215275	0.000133356	0.000514374	0.00102875	0.000685832	0.00131451	0.000914442	0.000628679	0.000571527	0.000971595	0.000114305	0.000685832	0.000514374	0.000628679	5.71527e-05	0.00154312	0.000342916	0.000685832	0.000800137	0.00331485	0.00782991	0.000571527	0.0010859	5.71527e-05	5.71527e-05	0	0.000342916	0.000171458	0.000171458	0.000114305	0	0.00125736	0.000114305	0.000285763	0.000400069
Otu00160	Bacteria;Bacteroidetes;Bacteroidia;Bacteroidales;Bacteroidaceae;Bacteroides	Bacteroidetes	Bacteroidia	Bacteroidales	Bacteroidaceae	Bacteroides	0.00130998	C70117_71_000000000C45C2_1_1101_12694_15014	0.000295289	0.000609628	0.000242899	0.00746795	0.00075251	0.00015717	0.000228611	0.000114305	0.000400069	0.000628679	0.000342916	5.71527e-05	0.000114305	0.000342916	0.00257187	0.000171458	0.000400069	5.71527e-05	0	0.000800137	0	0.000171458	0.0173744	0.0225753	0.00228611	0.00211465	5.71527e-05	0.000400069	0.00188604	0.000800137	0	0.00154312	0.000228611	5.71527e-05	5.71527e-05	0	5.71527e-05	0.000514374
Otu00161	Bacteria;Bacteroidetes;Bacteroidia;Bacteroidales;Porphyromonadaceae;unclassified_Porphyromonadaceae	Bacteroidetes	Bacteroidia	Bacteroidales	Porphyromonadaceae	unclassified_Porphyromonadaceae	0.0013	C70117_71_000000000C45C2_1_1118_7628_13240	0.00203844	0.00151455	0.000785849	0.00268617	0.00130499	0.00145739	0.00171458	0.00114305	0.00200034	0.00085729	0.00491513	0.00160027	0.00182888	0.00154312	0.000628679	0.00411499	0.000342916	0.000628679	0.00131451	0.000171458	0.00160027	5.71527e-05	0.000742985	0.000228611	0.00200034	0.00280048	0.000171458	0.0101732	0.000514374	0.00228611	0.000285763	0.00085729	0.000571527	0.00331485	0.00120021	0.000342916	0.00137166	0.00291479
Otu00162	Bacteria;Firmicutes;Clostridia;Clostridiales;Lachnospiraceae;unclassified_Lachnospiraceae	Firmicutes	Clostridia	Clostridiales	Lachnospiraceae	unclassified_Lachnospiraceae	0.00128911	M01394_160_000000000C9RJW_1_2103_25171_5718	0.000285763	0	2.85763e-05	0.000200034	0.00160027	0.000357204	0	0	0.00131451	0	0	0.000400069	0	0	0	0	0	0	0	0.000114305	0	0	5.71527e-05	0	0.000514374	0	0.000571527	5.71527e-05	0	0	5.71527e-05	0	5.71527e-05	0.00948734	0	5.71527e-05	0.00137166	0
Otu00163	Bacteria;Firmicutes;Erysipelotrichia;Erysipelotrichales;Erysipelotrichaceae;Allobaculum	Firmicutes	Erysipelotrichia	Erysipelotrichales	Erysipelotrichaceae	Allobaculum	0.00127641	M06047_81_000000000CBLT5_1_1101_19381_8066	0.00203844	0.000695357	0.000871578	0.00054295	0.000533425	0.00257187	0.000114305	0.000800137	0.00491513	0.00234326	0.00297194	0.0010859	0.000285763	0.00120021	0.000571527	0.000971595	0.00085729	0.000285763	0.0020575	0.000342916	0.000457221	0.000628679	0.000114305	0.000171458	0.0020575	0	0	0.000914442	0.00240041	0.000171458	0	0.000628679	0	0	0.000971595	0	0	0.00931588
Otu00164	Bacteria;Firmicutes;Clostridia;Clostridiales;Lachnospiraceae;unclassified_Lachnospiraceae	Firmicutes	Clostridia	Clostridiales	Lachnospiraceae	unclassified_Lachnospiraceae	0.00127097	M06047_81_000000000CBLT5_1_1117_11093_3823	0.00110495	0.000514374	0.000257187	0.00194319	0.00246709	0.00258616	0.000400069	0.00308624	0.000342916	0.000571527	0.00148597	0.000742985	0.000628679	0.000628679	0.000285763	0.000685832	0.000457221	0.000400069	0.000457221	0	0.000400069	0.000171458	0.00137166	0.000285763	0.00131451	0.000685832	0.00240041	0.00560096	0.000457221	0.000514374	0.00245756	0.000285763	0.00417214	0.00691547	0.000171458	0.0042293	0.0053152	0.000628679
Otu00165	Bacteria;Firmicutes;Clostridia;Clostridiales;Lachnospiraceae;unclassified_Lachnospiraceae	Firmicutes	Clostridia	Clostridiales	Lachnospiraceae	unclassified_Lachnospiraceae	0.00124466	M06047_81_000000000CBLT5_1_2104_17812_9898	0.00107637	0.00134309	0.000128593	0.00119068	0.00250519	0.000457221	0.00222895	0.000114305	0.000800137	0.000914442	0.00085729	0.00154312	0.000400069	0.00194319	0.00160027	0.00148597	0.00240041	0.000228611	0	0	5.71527e-05	0.000457221	0.00154312	0.000571527	0.000342916	0.000571527	0.00388638	0.000228611	0.00417214	0.000514374	0.00440075	0.00400069	0.00125736	0.000685832	0.000285763	0.00125736	0.000228611	5.71527e-05
Otu00166	Bacteria;Bacteroidetes;Bacteroidia;Bacteroidales;Porphyromonadaceae;unclassified_Porphyromonadaceae	Bacteroidetes	Bacteroidia	Bacteroidales	Porphyromonadaceae	unclassified_Porphyromonadaceae	0.00121563	M06047_81_000000000CBLT5_1_1104_26883_11403	0.00111448	0.000628679	0.000485798	0.00193366	0.00127641	0.00151455	0.000342916	0.00160027	0.000742985	0.0021718	0.000800137	0.00102875	0.00102875	0.000114305	0.00154312	0.000571527	5.71527e-05	0.000457221	0.000685832	0.000628679	5.71527e-05	0.000571527	0.00262902	0.00297194	0.000800137	0.00308624	0.00177173	0.000342916	0.000742985	0.00085729	0.00120021	0.000114305	0.00400069	0.000742985	0.000971595	0.00411499	0.000400069	0.000571527
Otu00167	Bacteria;Firmicutes;Clostridia;Clostridiales;Lachnospiraceae;unclassified_Lachnospiraceae	Firmicutes	Clostridia	Clostridiales	Lachnospiraceae	unclassified_Lachnospiraceae	0.00120656	M06047_81_000000000CBLT5_1_2117_18538_11136	0.00122878	0.00195272	0.00147168	0.000990646	0.00197177	0.00135738	0.000685832	0.00302909	0.000685832	0.000114305	0.00160027	0.00125736	0.00228611	0.00131451	0.000685832	0.00211465	0.000800137	0.00451506	0.000742985	0.0031434	0.000228611	0.00177173	0.00085729	0.000571527	0.000571527	0.000914442	0.00085729	0.0021718	0.0032577	0.000628679	0.00120021	0.00142882	0.0031434	0.0021718	0.000171458	0.00257187	0.00222895	0.000457221
Otu00168	Bacteria;Firmicutes;Clostridia;Clostridiales;Lachnospiraceae;unclassified_Lachnospiraceae	Firmicutes	Clostridia	Clostridiales	Lachnospiraceae	unclassified_Lachnospiraceae	0.00119113	M06047_81_000000000CBLT5_1_1108_12382_10323	0.000819188	0.000228611	2.85763e-05	0.00031434	0.000323865	0.00122878	5.71527e-05	0.00182888	0	5.71527e-05	0.000457221	0.00251472	0.000171458	0.000228611	5.71527e-05	0.000285763	5.71527e-05	0.000571527	0	5.71527e-05	5.71527e-05	0	0	0	0.000171458	5.71527e-05	0.00142882	0.000228611	5.71527e-05	0.000171458	0.00102875	0.000114305	0.000400069	0.000171458	0	0.00331485	0.00160027	0
Otu00169	Bacteria;Firmicutes;Clostridia;Clostridiales;Lachnospiraceae;Clostridium XlVb	Firmicutes	Clostridia	Clostridiales	Lachnospiraceae	Clostridium XlVb	0.0011739	C70117_71_000000000C45C2_1_2112_25375_13748	0.00174316	0.00145739	0.00121449	0.00102875	0.00139071	0.00225753	0.000914442	0.000457221	0.0010859	0.000285763	0.00371492	0.00400069	0.00125736	0.00417214	0.000571527	0.000914442	0.000685832	0.00114305	0.0010859	0.00182888	0.000228611	0.00171458	0.000400069	0.000285763	0.00177173	0.0010859	0.000914442	0.00171458	0.00148597	0.00125736	0.000685832	0.000342916	0.0010859	0.00348631	0.00160027	0.00520089	0.00120021	0.00102875
Otu00170	Bacteria;Firmicutes;Clostridia;Clostridiales;Ruminococcaceae;unclassified_Ruminococcaceae	Firmicutes	Clostridia	Clostridiales	Ruminococcaceae	unclassified_Ruminococcaceae	0.00117208	M06047_81_000000000CBLT5_1_2114_10863_3074	0.00177173	0.00236231	0.00141453	0.000495323	0.000885866	0.00112876	0.000742985	0.000628679	0.00417214	0.00291479	0.000514374	0.00165743	0.00085729	0.00405784	0.00148597	0.00160027	0.00177173	0.00440075	0.00245756	0.000285763	0.000114305	0.00280048	5.71527e-05	0.000114305	0	0.00102875	0.00154312	0.000228611	0.000342916	0.000457221	0.00165743	0.00120021	0.000571527	0.0010859	0.00114305	0.00142882	0.00182888	0.000114305
Otu00171	Bacteria;Firmicutes;Clostridia;Clostridiales;unclassified_Clostridiales;	Firmicutes	Clostridia	Clostridiales	unclassified_Clostridiales		0.00117027	M06047_81_000000000CBLT5_1_1101_21267_16046	0.000171458	0.00254329	0.0039864	0.00240994	0.00416262	0.000114305	5.71527e-05	0.000571527	0.000171458	0.000114305	0.000114305	0	0.000342916	5.71527e-05	0.000342916	0.000342916	0.00805852	0.00611533	0.000114305	0.00262902	0.000171458	0.0130308	0.00228611	0.00211465	0	0.0100589	0	0	0.00874436	0.000342916	0.000114305	0.0153741	0.000171458	0.000228611	0.000228611	0	0.000114305	0.000114305
Otu00172	Bacteria;Proteobacteria;Deltaproteobacteria;unclassified_Deltaproteobacteria;;	Proteobacteria	Deltaproteobacteria	unclassified_Deltaproteobacteria			0.00115757	M06047_81_000000000CBLT5_1_2104_25001_19032	0.000447696	0.000428645	2.85763e-05	0.000790612	0.000114305	0.001686	0.000342916	0	0.000457221	0.00182888	5.71527e-05	0	0	0.000114305	0.00228611	0	5.71527e-05	0.000114305	0	0.000114305	0	0	0	0	0.000400069	0	0.00102875	0.00331485	0	5.71527e-05	0.000457221	0	0.000114305	5.71527e-05	0	0.00645825	0.000285763	0
Otu00173	Bacteria;Firmicutes;Clostridia;Clostridiales;Lachnospiraceae;unclassified_Lachnospiraceae	Firmicutes	Clostridia	Clostridiales	Lachnospiraceae	unclassified_Lachnospiraceae	0.0011485	C70117_71_000000000C45C2_1_2117_9771_7317	0.00130499	0.00043817	4.28645e-05	0.000790612	0.00197177	0.00177173	0.00085729	0.00342916	0.000514374	0.000228611	0.00160027	0.00120021	0.000571527	0.000400069	0.000114305	0.000914442	0.000171458	0.000457221	0.000114305	0	0	5.71527e-05	0	0.000171458	5.71527e-05	0.000571527	0.00337201	0.000571527	5.71527e-05	0.000342916	0.00297194	0.000228611	0.00657256	0.00165743	5.71527e-05	0.00274333	0.00417214	0.000114305
Otu00174	Bacteria;Bacteroidetes;Bacteroidia;Bacteroidales;Bacteroidaceae;Bacteroides	Bacteroidetes	Bacteroidia	Bacteroidales	Bacteroidaceae	Bacteroides	0.0011367	M06047_81_000000000CBLT5_1_2113_8903_4253	0.000571527	0.000180983	0.000128593	0.00266712	0.000361967	0.000300051	0.00131451	0.000685832	0.000342916	0.000228611	0.000342916	0.000514374	0.000228611	5.71527e-05	0.000228611	0.000171458	0.000228611	0.000171458	5.71527e-05	5.71527e-05	0.000285763	0.000114305	0.00680117	0.00725839	0.00085729	0.000400069	0.000457221	0.000228611	0.000114305	0.000457221	0.000342916	0	0.000571527	0.000685832	0.000171458	5.71527e-05	0.000685832	0.000285763
Otu00175	Bacteria;Bacteroidetes;Bacteroidia;Bacteroidales;Porphyromonadaceae;Parabacteroides	Bacteroidetes	Bacteroidia	Bacteroidales	Porphyromonadaceae	Parabacteroides	0.00113398	M06047_81_000000000CBLT5_1_2106_9934_17835	0.000676306	0.00198129	0.00120021	0.00309577	0.00147644	0.000828713	0.000685832	0.000342916	0	0.000171458	0.00125736	0.00160027	0.000400069	0.000628679	0.000914442	0.000285763	0.00240041	0.00725839	0.000171458	0.00102875	0.000342916	0.0032577	0.00148597	0.00211465	0.00194319	0.0106304	0.000400069	0.00200034	0.00194319	0.00085729	0.000457221	0.00348631	0.00160027	0.000514374	0.00257187	0.000114305	0.000114305	0.000514374
Otu00176	Bacteria;Firmicutes;Clostridia;Clostridiales;Clostridiaceae 1;Clostridium sensu stricto	Firmicutes	Clostridia	Clostridiales	Clostridiaceae 1	Clostridium sensu stricto	0.00111402	M06047_81_000000000CBLT5_1_2108_14606_16781	0.00301004	0.000238136	0.000757273	0.00240994	0.00122878	0.00167172	0	0.000342916	0.00674401	0.00451506	0.000228611	0.00622964	0.000514374	0.000228611	0.000285763	0.000285763	0	0.000114305	0.00085729	0.000285763	0.00131451	0.000571527	0.00120021	0.0020575	0.000800137	0.010116	0	0.000285763	5.71527e-05	5.71527e-05	0.000342916	0.00417214	0	0.00274333	0.000342916	0.00234326	0.00377208	0.000228611
Otu00177	Bacteria;Firmicutes;Clostridia;Clostridiales;Lachnospiraceae;unclassified_Lachnospiraceae	Firmicutes	Clostridia	Clostridiales	Lachnospiraceae	unclassified_Lachnospiraceae	0.00108409	M06047_81_000000000CBLT5_1_2113_12016_23141	0.000219085	0.000295289	2.85763e-05	0.00085729	0.000609628	0.00328628	0.000228611	0.000171458	0.000114305	0.000114305	0.000285763	0.000400069	0.000800137	0.000514374	0	0.000400069	5.71527e-05	0	5.71527e-05	5.71527e-05	0	0	0.00194319	0.000514374	0.000514374	0.000228611	0.000628679	0.00131451	0.000228611	0.000171458	0.000400069	0	0.00154312	0.00131451	5.71527e-05	0.00765846	0.00491513	0.000514374
Otu00178	Bacteria;Firmicutes;Clostridia;Clostridiales;unclassified_Clostridiales;	Firmicutes	Clostridia	Clostridiales	unclassified_Clostridiales		0.00107774	M06047_81_000000000CBLT5_1_2115_8083_5639	0.000180983	0.000190509	0.00015717	0.000114305	0.00010478	0.000228611	0.000228611	0.000342916	0.000228611	5.71527e-05	5.71527e-05	0.000171458	0	0.000114305	0.000114305	0.000171458	0.000742985	0	0.000571527	5.71527e-05	0	0	0	0	0.000114305	5.71527e-05	0.000457221	5.71527e-05	5.71527e-05	0	0.000171458	0.000171458	5.71527e-05	0.000171458	0.000114305	0.000742985	0	5.71527e-05
Otu00179	Bacteria;Bacteroidetes;Bacteroidia;Bacteroidales;Porphyromonadaceae;unclassified_Porphyromonadaceae	Bacteroidetes	Bacteroidia	Bacteroidales	Porphyromonadaceae	unclassified_Porphyromonadaceae	0.0010732	M06047_81_000000000CBLT5_1_2114_19768_9035	0.00151455	0.0026576	0.000628679	0.000638205	0.000485798	0.000428645	0.000742985	0.000571527	0.00200034	0.00291479	0.000914442	0.00194319	0.00177173	0.00194319	0.0076013	0.00348631	0.000914442	0.000228611	0.00125736	0.00085729	5.71527e-05	0.000342916	0.000400069	0.000114305	0.00142882	0.000514374	0	0.00137166	0.000114305	0.00188604	0	0.000228611	0.000685832	0	0.000685832	0	0.000285763	0.000742985
Otu00180	Bacteria;Firmicutes;Clostridia;Clostridiales;Lachnospiraceae;unclassified_Lachnospiraceae	Firmicutes	Clostridia	Clostridiales	Lachnospiraceae	unclassified_Lachnospiraceae	0.00107139	C70117_71_000000000C45C2_1_1116_14111_17585	0.001686	0.000266712	2.85763e-05	0.000390543	0.00128593	0.00180031	0.00171458	0.00451506	0.000342916	0.000114305	0.00131451	0.00211465	0.000228611	0.000171458	0.000342916	0.000685832	0.000114305	5.71527e-05	5.71527e-05	5.71527e-05	0	0	0.000114305	0.000171458	0.000114305	0.000228611	0.00160027	0.000114305	5.71527e-05	0.000228611	0.00171458	0.000171458	0.0042293	0.00131451	5.71527e-05	0.00440075	0.00240041	0.000342916
Otu00181	Bacteria;Bacteroidetes;Bacteroidia;Bacteroidales;Bacteroidaceae;Bacteroides	Bacteroidetes	Bacteroidia	Bacteroidales	Bacteroidaceae	Bacteroides	0.00106776	C70117_71_000000000C45C2_1_1113_8746_4553	0.000914442	0.000819188	0.00172887	0.00226706	0.000895392	0.00038578	0.000285763	0.000285763	0.000742985	0.0010859	0.00148597	0.00160027	0.000514374	0.000685832	0.000914442	0.000457221	0.000571527	0.00177173	0.000285763	0.00228611	0.0021718	0.0021718	0.00348631	0.0043436	0.00171458	0.00297194	0.000571527	0.000514374	0.000400069	0.000571527	0.000628679	0.00125736	0.00177173	0.000742985	0.000571527	0.000400069	0.000457221	0.000114305
Otu00182	Bacteria;Firmicutes;Clostridia;Clostridiales;Lachnospiraceae;unclassified_Lachnospiraceae	Firmicutes	Clostridia	Clostridiales	Lachnospiraceae	unclassified_Lachnospiraceae	0.00106413	M01394_160_000000000C9RJW_1_1114_20999_19308	0.000400069	2.85763e-05	0	0.000781086	0.00132404	0.0026576	0.000514374	0	0.000400069	0.000457221	0.000285763	0.000742985	5.71527e-05	5.71527e-05	0	0	5.71527e-05	0	0	0	0	0	0	5.71527e-05	0.000571527	0	0.00331485	0.000742985	0	5.71527e-05	0.00194319	0.000114305	0.00445791	0.00137166	0	5.71527e-05	0.0105732	0
Otu00183	Bacteria;Firmicutes;Clostridia;Clostridiales;Lachnospiraceae;unclassified_Lachnospiraceae	Firmicutes	Clostridia	Clostridiales	Lachnospiraceae	unclassified_Lachnospiraceae	0.00105959	M06047_81_000000000CBLT5_1_1115_18115_12494	0.000933493	0.000123831	0.000100017	0.000285763	0.000523899	0.000471509	0.000114305	0.000971595	0.000514374	5.71527e-05	0.00148597	0.00245756	0.000285763	0.000114305	0	5.71527e-05	0.000228611	5.71527e-05	0.000171458	0.000114305	0.000114305	0	0.000285763	0.000285763	0.000285763	0.000114305	0.000400069	0.000342916	5.71527e-05	5.71527e-05	0.00085729	0	0.000171458	0.00200034	5.71527e-05	0.00102875	0.000400069	0.000400069
Otu00184	Bacteria;Firmicutes;Clostridia;Clostridiales;Ruminococcaceae;unclassified_Ruminococcaceae	Firmicutes	Clostridia	Clostridiales	Ruminococcaceae	unclassified_Ruminococcaceae	0.00104689	M06047_81_000000000CBLT5_1_2115_12937_12354	0.001124	0.00142882	0.000771561	0.000571527	0.000552476	0.000642967	0.000742985	0.00154312	0.00102875	0.0010859	0.000685832	0.00165743	0.00177173	0.00165743	0.00102875	0.00114305	0.00228611	0.000685832	0.000971595	0.000742985	0.000342916	0.00102875	0.000742985	0.000228611	0.000742985	0.0010859	5.71527e-05	0.000571527	0.00142882	0.000514374	5.71527e-05	0.00120021	5.71527e-05	5.71527e-05	0.00137166	0.000114305	0	0.0010859
Otu00185	Bacteria;Firmicutes;Clostridia;Clostridiales;Lachnospiraceae;unclassified_Lachnospiraceae	Firmicutes	Clostridia	Clostridiales	Lachnospiraceae	unclassified_Lachnospiraceae	0.00102421	M06047_81_000000000CBLT5_1_2104_22808_20173	0.000123831	0	0	0.000180983	9.52544e-05	0.00015717	0	0.000114305	0	0	0.000514374	0.000114305	0	0	0	0	0	0	0	0	0	0	0	0	0.000514374	0	5.71527e-05	0.000514374	0	0	5.71527e-05	5.71527e-05	0.000342916	0.000114305	0	0.000400069	0.000228611	0
Otu00186	Bacteria;Firmicutes;Clostridia;Clostridiales;Lachnospiraceae;Clostridium XlVa	Firmicutes	Clostridia	Clostridiales	Lachnospiraceae	Clostridium XlVa	0.00102421	M01394_160_000000000C9RJW_1_2116_13181_12509	0.000619154	0.000190509	4.28645e-05	0.0011621	0.00156217	0.0059153	0	0.00120021	0.000285763	0.000114305	0.000742985	0.00137166	0.000342916	0.000342916	0.000171458	0.000171458	0.000114305	0	0.000114305	5.71527e-05	0	0	0.00085729	0.000171458	0.000514374	5.71527e-05	0.00445791	0.000914442	0.000114305	0	0.00537235	5.71527e-05	0.000457221	0.00337201	5.71527e-05	0.00634394	0.01686	0.000400069
Otu00187	Bacteria;Bacteroidetes;Bacteroidia;Bacteroidales;Porphyromonadaceae;Odoribacter	Bacteroidetes	Bacteroidia	Bacteroidales	Porphyromonadaceae	Odoribacter	0.00101695	M06047_81_000000000CBLT5_1_1101_21771_20147	0.000800137	0.000638205	0.000771561	0.0016479	0.000790612	0.000928731	0.000685832	0.000228611	0.000400069	0.000285763	0.000685832	0.00251472	0.000514374	0.00165743	0.000285763	0.000342916	0.000228611	0.000800137	0.000285763	0.00131451	0.00114305	0.000342916	0.00165743	0.00200034	0.000628679	0.00165743	0.000514374	0.00342916	0.000114305	0.000571527	0.000628679	0.000171458	0.000400069	0.00285763	0.000514374	0.00251472	0.000342916	0.000342916
Otu00188	Bacteria;Bacteroidetes;Bacteroidia;Bacteroidales;Rikenellaceae;Alistipes	Bacteroidetes	Bacteroidia	Bacteroidales	Rikenellaceae	Alistipes	0.00100698	M06047_81_000000000CBLT5_1_1103_17373_16417	0.0058391	8.5729e-05	7.14408e-05	0.000990646	0.000504848	0.00271475	0.00457221	0.000457221	0.000342916	0.000285763	0.00331485	0.0260616	5.71527e-05	0.000171458	0	0.000171458	0.000114305	0	0.000114305	0.000171458	0	0	0.0031434	0.00160027	0.000171458	0.000571527	0.000285763	0.000171458	0	0.00194319	0.000514374	0	0.000342916	0.000228611	0.000171458	0.000171458	0.000628679	0.00988741
Otu00189	Bacteria;Firmicutes;Clostridia;Clostridiales;Lachnospiraceae;unclassified_Lachnospiraceae	Firmicutes	Clostridia	Clostridiales	Lachnospiraceae	unclassified_Lachnospiraceae	0.000995182	M06047_81_000000000CBLT5_1_2113_22080_14370	0.00156217	4.76272e-05	8.5729e-05	0.000161933	0.000257187	0.000228611	0.000114305	0.00125736	0.00611533	0.000914442	0.000914442	5.71527e-05	0	0	0	0.000114305	0.000171458	0	0.000171458	0.000171458	0	0	0	0	0.000514374	5.71527e-05	5.71527e-05	0.000342916	0	0	0.000114305	0.000400069	0.000285763	0.000742985	0.000114305	0.000228611	0.000514374	5.71527e-05
Otu00190	Bacteria;Firmicutes;Clostridia;Clostridiales;Lachnospiraceae;unclassified_Lachnospiraceae	Firmicutes	Clostridia	Clostridiales	Lachnospiraceae	unclassified_Lachnospiraceae	0.000989739	M06047_81_000000000CBLT5_1_2117_9238_19748	0.00218133	8.5729e-05	7.14408e-05	0.000885866	0.00156217	0.00571527	0	0	0.000114305	0	0.000285763	0.0126879	0.000114305	0.000171458	0	5.71527e-05	0.000114305	5.71527e-05	0.000285763	0	0	0	0.000114305	0.000171458	5.71527e-05	0.000171458	0.0042293	0.000571527	0	0	0.00297194	0	0.000628679	0.00577242	0	0.00582957	0.0170315	0
Otu00191	Bacteria;Firmicutes;Clostridia;Clostridiales;Ruminococcaceae;unclassified_Ruminococcaceae	Firmicutes	Clostridia	Clostridiales	Ruminococcaceae	unclassified_Ruminococcaceae	0.000985203	M06047_81_000000000CBLT5_1_1116_7328_11565	1.90509e-05	0	0.000242899	0.000276238	0.000247662	0.00462937	0	0	0	0	0	0.000114305	0	0	0	0	0	0	0.000171458	0.000171458	0.000400069	0.000228611	0	0	0.000571527	0	0.000342916	0.000742985	0	0	0.000457221	0.000171458	0.000342916	0.000514374	0.0171458	0.000742985	0.000628679	0
Otu00192	Bacteria;Firmicutes;Clostridia;Clostridiales;Lachnospiraceae;unclassified_Lachnospiraceae	Firmicutes	Clostridia	Clostridiales	Lachnospiraceae	unclassified_Lachnospiraceae	0.000984296	M06047_81_000000000CBLT5_1_1112_8071_19943	0.00128593	2.85763e-05	4.28645e-05	0.000809663	0.000523899	4.28645e-05	0.00171458	0.00445791	0.0010859	0	0.000285763	0.000171458	0	0	0	0	0.000171458	0	0.000114305	5.71527e-05	0	0	0	0	0.000228611	0	0.00457221	5.71527e-05	0	0.000114305	0.00274333	0	0.000114305	0.000171458	0	5.71527e-05	0.000114305	0
Otu00193	Bacteria;Firmicutes;Clostridia;Clostridiales;Lachnospiraceae;unclassified_Lachnospiraceae	Firmicutes	Clostridia	Clostridiales	Lachnospiraceae	unclassified_Lachnospiraceae	0.000961616	M06047_81_000000000CBLT5_1_1102_8028_15717	0.000571527	0.00132404	0.00038578	0.000990646	0.000295289	0.000657256	0.000971595	0.000400069	0.000685832	0.000285763	0.000114305	0.000971595	0.000971595	0.000628679	0.000800137	0.000514374	0.00365777	0.00137166	0.000571527	0.000342916	0.000114305	0.000514374	0.00171458	0.0010859	0.0010859	0.000628679	0.000514374	0.000914442	0.000171458	0.000400069	0.000571527	5.71527e-05	0.000457221	0.000114305	0.00171458	0.000228611	0.000400069	0.000285763
Otu00194	Bacteria;Firmicutes;Clostridia;Clostridiales;Lachnospiraceae;unclassified_Lachnospiraceae	Firmicutes	Clostridia	Clostridiales	Lachnospiraceae	unclassified_Lachnospiraceae	0.000953451	M06047_81_000000000CBLT5_1_1102_16987_4034	0.00177173	0.000590577	0.000100017	0.000657256	0.000990646	0.00188604	0.00120021	0.00280048	0.00228611	0.000400069	0.00131451	0.00262902	0.00257187	0.000457221	5.71527e-05	0.000342916	0.000114305	0	5.71527e-05	5.71527e-05	0.000228611	5.71527e-05	0.000171458	0.000114305	0.000114305	0.000114305	0.00274333	0.000685832	0.000171458	0.000400069	0.00291479	0.000342916	0.000228611	0.00188604	5.71527e-05	0.00371492	0.00245756	0.00131451
Otu00195	Bacteria;Firmicutes;Clostridia;Clostridiales;Lachnospiraceae;Clostridium XlVa	Firmicutes	Clostridia	Clostridiales	Lachnospiraceae	Clostridium XlVa	0.000946194	M06047_81_000000000CBLT5_1_2106_22231_4007	0.000562001	0.000228611	0.000185746	0.00180983	0.00204797	0.00222895	0.000171458	0.00182888	0	0.000114305	0.000914442	0.000342916	0.000171458	0.000228611	0.000171458	0.000685832	5.71527e-05	5.71527e-05	0.000285763	5.71527e-05	0.000342916	5.71527e-05	0.00131451	0.000171458	0.000628679	0.00148597	0.00342916	0.00382923	5.71527e-05	0.000228611	0.00365777	0.000342916	0.00588672	0.00211465	0.000228611	0.00291479	0.00394353	0.00182888
Otu00196	Bacteria;Firmicutes;Bacilli;Lactobacillales;Streptococcaceae;Streptococcus	Firmicutes	Bacilli	Lactobacillales	Streptococcaceae	Streptococcus	0.000939844	M06047_81_000000000CBLT5_1_2104_7108_5778	0.000895392	0.00132404	0.000871578	0.00175268	0.000600103	0.000685832	0.00131451	0.000342916	0.000914442	0.00114305	0.00125736	0.000400069	0.0021718	0.000400069	0.00114305	0.00354346	0.000342916	0.000342916	0.00188604	0.000971595	0.000571527	5.71527e-05	0.00348631	0.00520089	0	0.00177173	5.71527e-05	0	0.000171458	0.00211465	0.000171458	0.000914442	0.000228611	0	0.0021718	0	0.000228611	0.000342916
Otu00197	Bacteria;Bacteroidetes;Bacteroidia;Bacteroidales;Porphyromonadaceae;unclassified_Porphyromonadaceae	Bacteroidetes	Bacteroidia	Bacteroidales	Porphyromonadaceae	unclassified_Porphyromonadaceae	0.000932586	M06047_81_000000000CBLT5_1_2103_14426_18418	0.00020956	0.000247662	8.5729e-05	4.76272e-05	0.000342916	2.85763e-05	5.71527e-05	0.000628679	5.71527e-05	0	0.000457221	5.71527e-05	0.000171458	0	5.71527e-05	0.000114305	0.00102875	0.000114305	5.71527e-05	5.71527e-05	0.000228611	0	0	5.71527e-05	0.000114305	0	0.000114305	0	0.000628679	0.000228611	0.000228611	0.000114305	0.00085729	0	0	0	0.000114305	0
Otu00198	Bacteria;Firmicutes;Clostridia;Clostridiales;Ruminococcaceae;unclassified_Ruminococcaceae	Firmicutes	Clostridia	Clostridiales	Ruminococcaceae	unclassified_Ruminococcaceae	0.000925329	M06047_81_000000000CBLT5_1_1110_3006_16998	0.00103827	0.00162885	0.000514374	0.000447696	0.000590577	0.000371492	0.000628679	0.000685832	0.00222895	0.00114305	0.000514374	0.00102875	0.00114305	0.00331485	0.00194319	0.0020575	0.0010859	0.000228611	0.00171458	0	0	0.000342916	0.000171458	5.71527e-05	0	0	0.00245756	0	0.000800137	0.000285763	0.00177173	0.000514374	0.000114305	5.71527e-05	0.00120021	0.000228611	5.71527e-05	0
Otu00199	Bacteria;Proteobacteria;Gammaproteobacteria;Oceanospirillales;Oceanospirillaceae;Marinobacterium	Proteobacteria	Gammaproteobacteria	Oceanospirillales	Oceanospirillaceae	Marinobacterium	0.000924422	M06047_81_000000000CBLT5_1_2118_7766_5216	0.000866815	3.81018e-05	0	0.000381018	0.000514374	0	0	0	0	0.0032577	0	0.00194319	0	0.000228611	0	0	0	0	0	0	0	0	0.000971595	0.00131451	0	0	0	0	0.00308624	0	0	0	0	0	0	0	0	0
Otu00200	Bacteria;Firmicutes;Clostridia;Clostridiales;Ruminococcaceae;unclassified_Ruminococcaceae	Firmicutes	Clostridia	Clostridiales	Ruminococcaceae	unclassified_Ruminococcaceae	0.000922607	M06047_81_000000000CBLT5_1_1111_23002_15641	0.00075251	0.00186699	0.00031434	0.00096207	0.000790612	0.000285763	0.000971595	0.000457221	0.000685832	0.00120021	0.000342916	0.00085729	0.00102875	0.00291479	0.00342916	0.00285763	0.000571527	0.000400069	0.000228611	0.000342916	0.000114305	0.000571527	0.00114305	0.000228611	0.00240041	0.000457221	0.000457221	0.0010859	0.00142882	0.000971595	0.000342916	0.000171458	0.000571527	0.00125736	0.000457221	0.000114305	0.000571527	0
Otu00201	Bacteria;Firmicutes;Clostridia;Clostridiales;Lachnospiraceae;unclassified_Lachnospiraceae	Firmicutes	Clostridia	Clostridiales	Lachnospiraceae	unclassified_Lachnospiraceae	0.000914442	M06047_81_000000000CBLT5_1_2110_27792_8177	0.00140977	0.000142882	0.000142882	0.000161933	0.00020956	0.000114305	5.71527e-05	0.00411499	0.00085729	0.00337201	5.71527e-05	0	0.000571527	5.71527e-05	5.71527e-05	0	5.71527e-05	0.000114305	0.000285763	0.000171458	5.71527e-05	5.71527e-05	0	5.71527e-05	0.000514374	5.71527e-05	5.71527e-05	0.000285763	0.000400069	5.71527e-05	5.71527e-05	0.000114305	5.71527e-05	0.000571527	5.71527e-05	0.000114305	0.000228611	5.71527e-05
Otu00202	Bacteria;Firmicutes;Clostridia;Clostridiales;Lachnospiraceae;Dorea	Firmicutes	Clostridia	Clostridiales	Lachnospiraceae	Dorea	0.000908999	M06047_81_000000000CBLT5_1_2107_21406_16599	0.00133356	0.00020956	0.000142882	0.00199082	0.00361967	0.000200034	0.000171458	0.000171458	0.00131451	0.000171458	0.00285763	0.00331485	0.000342916	5.71527e-05	0	0.000228611	0.000285763	0.000342916	0.000457221	0.000114305	0	0	0.0010859	0.000971595	0.00560096	0.00131451	0.000342916	0.00262902	0.0085729	0.00394353	0.000285763	0.00668686	0.000171458	0.0020575	5.71527e-05	0.000571527	0.000114305	5.71527e-05
Otu00203	Bacteria;Firmicutes;Clostridia;Clostridiales;Lachnospiraceae;unclassified_Lachnospiraceae	Firmicutes	Clostridia	Clostridiales	Lachnospiraceae	unclassified_Lachnospiraceae	0.000903556	M03062_107_000000000CBKND_1_2110_13097_4868	0.00243851	3.81018e-05	5.71527e-05	0.00219085	0.00124783	0.00225753	0.000400069	0.0138309	0.000171458	5.71527e-05	0.000171458	0	0	0	5.71527e-05	0	0	0.000171458	0	5.71527e-05	0.000114305	5.71527e-05	0.000171458	0.000171458	5.71527e-05	0.00257187	0.00983026	0.000342916	5.71527e-05	5.71527e-05	0.00594388	5.71527e-05	0.000114305	0.00125736	0.000342916	0.00348631	0.00188604	0.00331485
Otu00204	Bacteria;Bacteroidetes;Bacteroidia;Bacteroidales;Porphyromonadaceae;unclassified_Porphyromonadaceae	Bacteroidetes	Bacteroidia	Bacteroidales	Porphyromonadaceae	unclassified_Porphyromonadaceae	0.000899928	M06047_81_000000000CBLT5_1_2102_22828_9292	2.85763e-05	0.000247662	0.000914442	0.000809663	0.000257187	0.000214322	5.71527e-05	5.71527e-05	0	0	5.71527e-05	0	0.00142882	0	0	5.71527e-05	0	0	0.00137166	0.000114305	0.00102875	0.00114305	0	0	0.00320055	0	0	0.00165743	0.000171458	0.000114305	0	0	0.000800137	0.000457221	0.000114305	5.71527e-05	5.71527e-05	0.000628679
Otu00205	Bacteria;Firmicutes;Clostridia;Clostridiales;Lachnospiraceae;unclassified_Lachnospiraceae	Firmicutes	Clostridia	Clostridiales	Lachnospiraceae	unclassified_Lachnospiraceae	0.000895392	C70117_71_000000000C45C2_1_2115_13522_16945	6.66781e-05	0.00230516	0.00490084	0.000600103	0.00158122	0.000300051	0	0.000228611	0	0.000114305	0	5.71527e-05	0.000171458	0.00102875	0.000457221	0.000171458	0.00268617	0.00931588	0.00394353	0.00971595	0.000285763	0.00565811	5.71527e-05	0.000228611	0.00194319	0	0.000628679	0.000742985	0.00582957	0.000285763	0.000685832	0.000285763	0.000514374	0.00188604	0.000285763	0.000285763	0.000628679	0
Otu00206	Bacteria;Firmicutes;Clostridia;Clostridiales;Lachnospiraceae;unclassified_Lachnospiraceae	Firmicutes	Clostridia	Clostridiales	Lachnospiraceae	unclassified_Lachnospiraceae	0.000890856	M06047_81_000000000CBLT5_1_2105_10807_10611	0.000571527	0.000342916	5.71527e-05	0.0016098	0.00290526	0.00450077	5.71527e-05	0.000114305	0.00194319	0.00131451	0	0	0.000800137	0.000285763	0.000628679	0.000285763	0	5.71527e-05	0.000171458	5.71527e-05	0	0	5.71527e-05	5.71527e-05	0.00588672	0.000228611	0.000800137	0.00262902	5.71527e-05	0.000342916	0.000342916	0.000114305	0.000571527	0.0160027	5.71527e-05	0.000571527	0.0173744	0
Otu00207	Bacteria;unclassified_Bacteria;;;;	unclassified_Bacteria					0.000887227	M06047_81_000000000CBLT5_1_1108_10723_7205	0.000771561	0.00179078	0.00210036	0.000638205	0.000323865	0.000900154	0.00188604	0.000800137	0.000514374	0	0.000228611	0.00120021	0.00154312	0.00171458	0.00285763	0.00165743	0.00171458	0.00125736	0.000514374	0.00131451	0	0.00657256	0.000628679	0.00102875	0.000400069	0.00154312	0	0.000228611	0.000171458	0.000171458	5.71527e-05	0.00142882	0	0.000114305	0.00268617	0	0	0.000914442
Otu00208	Bacteria;Firmicutes;Clostridia;Clostridiales;Ruminococcaceae;Anaerotruncus	Firmicutes	Clostridia	Clostridiales	Ruminococcaceae	Anaerotruncus	0.00088632	M06047_81_000000000CBLT5_1_2104_17729_10939	0.000895392	9.52544e-05	4.28645e-05	0.000562001	0.000257187	0.000800137	0.000114305	0.00371492	0.000800137	0.000114305	0.000457221	0.000171458	0.000114305	0.000114305	0.000171458	0	5.71527e-05	0.000114305	0.000114305	0	5.71527e-05	0	0	5.71527e-05	0.000285763	5.71527e-05	0.00291479	5.71527e-05	0	0.000171458	0.00085729	5.71527e-05	0.000342916	0.000114305	0	0.000571527	0.00257187	5.71527e-05
Otu00209	Bacteria;Firmicutes;Clostridia;Clostridiales;unclassified_Clostridiales;	Firmicutes	Clostridia	Clostridiales	unclassified_Clostridiales		0.000872712	C70117_71_000000000C45C2_1_2103_25234_8187	0.00141929	0.000552476	5.71527e-05	0.00010478	0.000238136	0.00031434	0.000400069	0.000514374	0.00154312	0.0031434	0.000685832	0.00222895	0.000285763	0.000971595	0.000628679	0.000800137	0.000571527	5.71527e-05	0.000171458	0	5.71527e-05	0	0	0.000114305	5.71527e-05	0	0.000457221	0	0	0.000285763	0.000457221	0	0.000514374	0.000171458	0.000685832	0.000514374	5.71527e-05	0
Otu00210	Bacteria;Proteobacteria;Gammaproteobacteria;Alteromonadales;Alteromonadaceae;unclassified_Alteromonadaceae	Proteobacteria	Gammaproteobacteria	Alteromonadales	Alteromonadaceae	unclassified_Alteromonadaceae	0.000862733	M06047_81_000000000CBLT5_1_1119_6448_3022	0.00102875	3.81018e-05	0	0.000371492	0.000809663	0	0	0	0	0.0042293	0	0.00194319	0	0.000228611	0	0	0	0	0	0	0	0	0.000628679	0.00160027	0	0	0	0	0.00485798	0	0	0	0	0	0	0	0	0
Otu00211	Bacteria;Firmicutes;Clostridia;Clostridiales;Lachnospiraceae;unclassified_Lachnospiraceae	Firmicutes	Clostridia	Clostridiales	Lachnospiraceae	unclassified_Lachnospiraceae	0.000860011	C70117_71_000000000C45C2_1_2118_11568_21007	0.00031434	0.000523899	0.000228611	0.00156217	0.00200987	0.00244328	0.000285763	0.000914442	5.71527e-05	0.000342916	0.000171458	0.000114305	0.000685832	0.000114305	0.00120021	0.00085729	0.000171458	0.000114305	0.000571527	0.000114305	0.000228611	0	5.71527e-05	0	0.000171458	0.00125736	0.00165743	0.00622964	5.71527e-05	0.000457221	0.00142882	0.000114305	0.000800137	0.00920158	0	0.00285763	0.00657256	0.000342916
Otu00212	Bacteria;Firmicutes;Clostridia;Clostridiales;Ruminococcaceae;Ruminococcus	Firmicutes	Clostridia	Clostridiales	Ruminococcaceae	Ruminococcus	0.000859104	M03062_107_000000000CBKND_1_1107_14354_12188	0	0	0.00705835	0	0	1.42882e-05	0	0	0	0	0	0	0	0	0	0	0	0	0.0277762	5.71527e-05	0.000285763	0.000114305	0	0	0	0	0	0	0	0	0	0	0	0	0	0	0	5.71527e-05
Otu00213	Bacteria;Bacteroidetes;Bacteroidia;Bacteroidales;Porphyromonadaceae;Parabacteroides	Bacteroidetes	Bacteroidia	Bacteroidales	Porphyromonadaceae	Parabacteroides	0.000853661	C70117_71_000000000C45C2_1_1118_18894_21992	0.000180983	0.000552476	0.00115734	0.00566764	0.00120973	0.000528662	0.000171458	0.000171458	0.000114305	5.71527e-05	0.000457221	0.000114305	5.71527e-05	0.00125736	0.00085729	0.000628679	0.000171458	0.000342916	0.000114305	0.00211465	0.000114305	0.00228611	0.0134309	0.0188032	0.000228611	0.00085729	0.000171458	0.000514374	0.00365777	0.000457221	0.000285763	0.000285763	0.00251472	5.71527e-05	0.00125736	0.000742985	5.71527e-05	5.71527e-05
Otu00214	Bacteria;Firmicutes;Clostridia;Clostridiales;Ruminococcaceae;unclassified_Ruminococcaceae	Firmicutes	Clostridia	Clostridiales	Ruminococcaceae	unclassified_Ruminococcaceae	0.000850032	M06047_81_000000000CBLT5_1_1110_10630_7221	0.000552476	0.000247662	0.000328628	0.0026576	0.000190509	0.000900154	5.71527e-05	0.000400069	0.000742985	0.000171458	0.00142882	0.000514374	0	0.00085729	0.000114305	0.000285763	0.000114305	0.000114305	0.000571527	0.000171458	0.000400069	0.000171458	0.00428645	0.00291479	0.00211465	0.00377208	0.000800137	0.0020575	5.71527e-05	0.000114305	0.000285763	0.000228611	5.71527e-05	0.000400069	0.000571527	0.000285763	0.000342916	0.00240041
Otu00215	Bacteria;Firmicutes;Clostridia;Clostridiales;Ruminococcaceae;Clostridium IV	Firmicutes	Clostridia	Clostridiales	Ruminococcaceae	Clostridium IV	0.000849125	M03062_107_000000000CBKND_1_1107_17067_21608	9.52544e-06	0.000352441	0.00415786	9.52544e-06	0.00158122	8.5729e-05	0	0	0	0	0	5.71527e-05	5.71527e-05	5.71527e-05	0.000171458	0.000228611	0.00148597	0.000114305	0.00137166	0.0132023	0.000571527	0.00148597	5.71527e-05	0	0	0	0	0	0.00360062	0.000285763	0	0.00560096	0	0	0.000285763	0	0	5.71527e-05
Otu00216	Bacteria;Firmicutes;Clostridia;Clostridiales;Lachnospiraceae;unclassified_Lachnospiraceae	Firmicutes	Clostridia	Clostridiales	Lachnospiraceae	unclassified_Lachnospiraceae	0.000846404	M06047_81_000000000CBLT5_1_2106_23389_15778	0.000152407	0.00225753	0.000671544	3.81018e-05	0.00457221	0.000185746	0.000171458	0.000171458	0.000171458	0.000171458	0.000114305	0.000114305	0.000571527	0.00200034	0.00154312	0.00125736	0.00148597	0.00668686	0.000400069	0.000971595	0.000114305	0.00120021	5.71527e-05	0.000114305	0	5.71527e-05	0	0	0.0201177	0.000628679	0	0.00668686	0	0	0.000628679	0	0	0.000114305
Otu00217	Bacteria;Bacteroidetes;Bacteroidia;Bacteroidales;unclassified_Bacteroidales;	Bacteroidetes	Bacteroidia	Bacteroidales	unclassified_Bacteroidales		0.000846404	C70117_71_000000000C45C2_1_2103_12093_13972	0.0020956	0.00496276	0.000400069	4.76272e-05	0.000133356	0.00102875	0.00462937	5.71527e-05	0.0043436	0.00302909	0.000342916	0.000171458	0.00240041	0.00828713	0.0102875	0.0053152	0.000114305	0.00337201	0.000228611	0.00085729	5.71527e-05	0.000457221	0	5.71527e-05	0	0.000228611	0	0	0	0.000685832	0	0.000114305	0	0	0.00285763	0	0	0.00125736
Otu00218	Bacteria;Firmicutes;Clostridia;Clostridiales;Ruminococcaceae;Butyricicoccus	Firmicutes	Clostridia	Clostridiales	Ruminococcaceae	Butyricicoccus	0.00084096	M06047_81_000000000CBLT5_1_2112_20904_22565	0.000114305	0.00031434	1.42882e-05	0.00156217	0.00170505	0.00522947	0	0.000114305	0.000171458	0	0.000171458	0.000228611	0.000914442	0.000228611	0.000171458	0.000457221	0	0.000114305	0	5.71527e-05	0	0	0	0	0.000285763	0	0.00845859	0.000628679	0	5.71527e-05	0.00371492	0	0.000400069	0.00605818	0	0.00554381	0.0147454	0.000628679
Otu00219	Bacteria;Firmicutes;Clostridia;Clostridiales;Lachnospiraceae;unclassified_Lachnospiraceae	Firmicutes	Clostridia	Clostridiales	Lachnospiraceae	unclassified_Lachnospiraceae	0.000830981	C70117_71_000000000C45C2_1_2119_24075_19588	0.00120021	0.000190509	1.42882e-05	0.000228611	0.000114305	2.85763e-05	0.000171458	0.00131451	0.00131451	0.00234326	0.00177173	0.000285763	0.000800137	5.71527e-05	0	0.000285763	0	0	5.71527e-05	0	0	0	0	5.71527e-05	0	0	0.00131451	0	0	0	0.000628679	5.71527e-05	0	0	0	0	5.71527e-05	5.71527e-05
Otu00220	Bacteria;Firmicutes;Clostridia;Clostridiales;Ruminococcaceae;unclassified_Ruminococcaceae	Firmicutes	Clostridia	Clostridiales	Ruminococcaceae	unclassified_Ruminococcaceae	0.000829167	M06047_81_000000000CBLT5_1_2115_22939_13044	0.00096207	0.000419119	0.000414357	0.000514374	0.00117163	0.00152883	0.00148597	0.00200034	0.000742985	0.000685832	0.000628679	0.000228611	0.00085729	0.000228611	0.000114305	5.71527e-05	0.000171458	0.0010859	0.000514374	0.000285763	0.000114305	0.000742985	5.71527e-05	0	0.000114305	0.000628679	0.00142882	0.00085729	0.000342916	0.00120021	0.00102875	0.000285763	0.00102875	0.0031434	0.000742985	0.00262902	0.00171458	0.00102875
Otu00221	Bacteria;Bacteroidetes;unclassified_Bacteroidetes;;;	Bacteroidetes	unclassified_Bacteroidetes				0.000791973	C70117_71_000000000C45C2_1_1108_5834_11594	0.000495323	0.000819188	0.00342916	0.00133356	0.000952544	0.00104304	0.000114305	0.000228611	0.000514374	0.000171458	0.000914442	0.00102875	0.000114305	0.000285763	0.000228611	0.00085729	0.000342916	0.00308624	0.000800137	0.00457221	0.000171458	0.00817283	0.000914442	0.00188604	0.000628679	0.00331485	0.000342916	0.000914442	0.000571527	0.000400069	0.000342916	0.00320055	0.000400069	0.000800137	0.00268617	0.000171458	0.00085729	0.000457221
Otu00222	Bacteria;Firmicutes;Clostridia;Clostridiales;Lachnospiraceae;unclassified_Lachnospiraceae	Firmicutes	Clostridia	Clostridiales	Lachnospiraceae	unclassified_Lachnospiraceae	0.000789251	M06047_81_000000000CBLT5_1_1102_15577_9333	0.000495323	0.00020956	8.5729e-05	0.000180983	0.0042674	0.0015717	0.000171458	0.000114305	0.000457221	5.71527e-05	0.00182888	0.000342916	0	0.00102875	0.000114305	5.71527e-05	0	5.71527e-05	0.000285763	5.71527e-05	0	0	0	0	5.71527e-05	0.000400069	0.000285763	0.000342916	5.71527e-05	5.71527e-05	0.000457221	5.71527e-05	0.000342916	0.0246328	0.000742985	0.00537235	0.000171458	0
Otu00223	Bacteria;Firmicutes;Clostridia;Clostridiales;Lachnospiraceae;unclassified_Lachnospiraceae	Firmicutes	Clostridia	Clostridiales	Lachnospiraceae	unclassified_Lachnospiraceae	0.000784715	M03062_107_000000000CBKND_1_1116_12684_22201	0.000238136	0.00377208	0.00282906	0.000142882	0.000200034	0.000400069	0	0.000171458	5.71527e-05	0	0.00102875	0.000171458	0.000171458	0.00148597	0.00102875	0.00160027	0.00617249	0.0121735	0.000228611	0.00428645	0.000171458	0.00662971	0	0	0.000457221	0	5.71527e-05	0.000342916	0.000114305	0.000114305	0.000628679	0	0.000114305	0.000228611	0.000571527	0.000171458	0.000228611	0.000628679
Otu00224	Bacteria;Firmicutes;Clostridia;Clostridiales;Ruminococcaceae;unclassified_Ruminococcaceae	Firmicutes	Clostridia	Clostridiales	Ruminococcaceae	unclassified_Ruminococcaceae	0.000777458	M06047_81_000000000CBLT5_1_2113_9557_17576	0.001124	0.000638205	0.000214322	0.000257187	0.00163838	0.00198605	0.000571527	0.00120021	0.00102875	0.000457221	0.0020575	0.00142882	0.00182888	0.000628679	0.000285763	0.000571527	0.000228611	0.000285763	0.000342916	0.000171458	0.000285763	5.71527e-05	0	0	0	0.000171458	0.00125736	0.000114305	0	0.000628679	0.0010859	0.000114305	0.00182888	0.00617249	0.000685832	0.000628679	0.00508659	0.00154312
Otu00225	Bacteria;Firmicutes;unclassified_Firmicutes;;;	Firmicutes	unclassified_Firmicutes				0.00077655	M06047_81_000000000CBLT5_1_1102_6075_12971	0.000923968	0.000342916	0.000214322	0.000600103	0.000762035	0.000528662	0.000742985	0.000628679	0.000457221	0.000800137	0.00131451	0.00160027	0.000800137	0.000457221	0.000400069	0.000228611	0	0.000171458	0.000571527	0	0.000171458	0.000114305	0	0	0.00171458	0.000571527	0.000228611	0.0010859	0.000400069	0.000514374	0.000285763	0.000114305	0.000628679	0.00262902	0.000285763	0.000571527	0.000628679	0.000628679
Otu00226	Bacteria;Proteobacteria;Alphaproteobacteria;Rhodobacterales;Rhodobacteraceae;Roseovarius	Proteobacteria	Alphaproteobacteria	Rhodobacterales	Rhodobacteraceae	Roseovarius	0.000760221	M06047_81_000000000CBLT5_1_1116_22096_12698	0.000676306	0.000200034	0	0.00031434	0.000400069	0	0	0	0	0.00342916	0	0.000628679	0	0.00120021	0	0	0	0	0	0	0	0	0.000800137	0.0010859	0	0	0	0	0.00240041	0	0	0	0	0	0	0	0	0
Otu00227	Bacteria;Firmicutes;Clostridia;Clostridiales;Ruminococcaceae;unclassified_Ruminococcaceae	Firmicutes	Clostridia	Clostridiales	Ruminococcaceae	unclassified_Ruminococcaceae	0.000759314	M06047_81_000000000CBLT5_1_1109_8417_20010	0.000790612	0.000323865	0.000242899	0.000676306	0.000342916	0.000342916	0.000400069	0.000285763	0.000971595	0.000457221	0.0010859	0.00154312	0.000971595	0.000171458	0.000171458	0.000114305	0.000400069	0.000114305	0.000342916	0.000342916	0.000171458	0.000114305	0.000571527	0.000800137	0.000457221	0.000342916	0.000685832	0.00120021	5.71527e-05	0.0010859	0.000342916	0.000228611	0.000171458	0.000171458	0.000342916	0.000171458	0.000342916	0.000514374
Otu00228	Bacteria;Firmicutes;Clostridia;Clostridiales;unclassified_Clostridiales;	Firmicutes	Clostridia	Clostridiales	unclassified_Clostridiales		0.000758407	C70117_71_000000000C45C2_1_1114_23869_3385	0.00075251	0.000600103	0.000257187	0.000771561	0.00118115	0.000528662	0.000228611	0.000457221	0.00102875	0.00125736	0.000800137	0.000742985	0.000685832	0.000685832	0.000971595	0.000457221	0.000514374	0.000285763	0.000400069	0.000171458	0.000285763	0.000171458	0.000285763	0	0.00131451	0.000800137	0.00137166	0.00085729	0.000285763	0.000685832	0.00125736	0.000285763	0.00354346	0.00102875	0.000114305	0.00120021	0.000628679	0.000171458
Otu00229	Bacteria;Bacteroidetes;Bacteroidia;Bacteroidales;Prevotellaceae;Paraprevotella	Bacteroidetes	Bacteroidia	Bacteroidales	Prevotellaceae	Paraprevotella	0.000756592	M06047_81_000000000CBLT5_1_1119_23373_23101	0.000371492	0.000790612	0.00194319	0.000419119	0.000571527	8.5729e-05	0.000400069	0.000285763	0.000228611	0.00102875	0.000114305	0.000171458	0.000114305	0.000342916	0.000457221	0.000400069	0.00274333	0.000685832	0.000171458	0.00268617	0.00348631	0.00142882	0	0.000171458	0	0.00234326	0	0	0.00165743	0.000800137	0	0.000800137	0.000171458	0	0.000114305	0	0	0.000228611
Otu00230	Bacteria;Firmicutes;Clostridia;Clostridiales;Lachnospiraceae;unclassified_Lachnospiraceae	Firmicutes	Clostridia	Clostridiales	Lachnospiraceae	unclassified_Lachnospiraceae	0.000750242	M06047_81_000000000CBLT5_1_2114_18980_14738	0.000295289	0.000342916	0	0.00401974	0.000457221	0.00368635	0.000285763	0.000285763	0.000114305	0.000571527	0.000457221	5.71527e-05	0.000400069	0.000400069	0.000685832	0.000457221	5.71527e-05	5.71527e-05	0	0	0	0	0.00211465	0.000228611	0.00085729	0.0184032	0.000228611	0.00228611	0.000457221	0.000400069	0.000228611	5.71527e-05	0.000342916	0.00125736	0	0.00102875	0.0136595	5.71527e-05
Otu00231	Bacteria;Firmicutes;Clostridia;Clostridiales;Ruminococcaceae;unclassified_Ruminococcaceae	Firmicutes	Clostridia	Clostridiales	Ruminococcaceae	unclassified_Ruminococcaceae	0.000744799	C70117_71_000000000C45C2_1_2119_13302_25075	0.000504848	8.5729e-05	5.71527e-05	7.62035e-05	2.85763e-05	0.000100017	0	0.00240041	0	0	0.000171458	0.000457221	0	0.000342916	0	5.71527e-05	5.71527e-05	5.71527e-05	5.71527e-05	0	0	0.000171458	0.000114305	0	0.000171458	0	0.000114305	5.71527e-05	0	0	5.71527e-05	0	0	0.000114305	0.000228611	0	0.000114305	5.71527e-05
Otu00232	Bacteria;unclassified_Bacteria;;;;	unclassified_Bacteria					0.000733913	M06047_81_000000000CBLT5_1_2117_13812_6592	0.000342916	0.00010478	0.000885866	1.90509e-05	0.000476272	0.000528662	0.000457221	0.00154312	0	0	5.71527e-05	0	0.000457221	0	0	0	0.000114305	5.71527e-05	0.00337201	0	0.000171458	0	0	0	0	0	0	0.000114305	0	0.00137166	0	5.71527e-05	0	0.00142882	0.00194319	0	0	0.000171458
Otu00233	Bacteria;Firmicutes;Clostridia;Clostridiales;unclassified_Clostridiales;	Firmicutes	Clostridia	Clostridiales	unclassified_Clostridiales		0.000727562	M06047_81_000000000CBLT5_1_2117_25003_8870	0.000247662	0.000409594	0.000671544	0.000523899	0.000371492	0.000728696	0.000457221	5.71527e-05	0.000342916	0.000285763	5.71527e-05	0.000285763	0.00120021	0.000114305	0.000400069	0.000685832	5.71527e-05	0	0.00131451	0	0.00131451	5.71527e-05	0	5.71527e-05	0.000114305	0	0.000228611	0.00274333	0	0.00188604	0.000114305	0	0	0.000228611	0.00131451	0.000400069	0.000228611	0.000971595
Otu00234	Bacteria;Firmicutes;Clostridia;Clostridiales;Lachnospiraceae;Roseburia	Firmicutes	Clostridia	Clostridiales	Lachnospiraceae	Roseburia	0.000726655	M06047_81_000000000CBLT5_1_1101_11525_16283	0.000276238	0.000123831	1.42882e-05	0.000295289	0.000619154	0.0018146	0.000285763	0.000342916	0.000514374	0	0.000342916	0.000171458	5.71527e-05	0	0	0.000685832	0	0	0	0	0	5.71527e-05	0	0	0.000114305	0	0.00148597	0.000171458	0	0	0.000971595	0.000114305	0.000400069	0.00222895	0	0.0064011	0.000628679	0.000228611
Otu00235	Bacteria;Firmicutes;Clostridia;Clostridiales;Lachnospiraceae;unclassified_Lachnospiraceae	Firmicutes	Clostridia	Clostridiales	Lachnospiraceae	unclassified_Lachnospiraceae	0.000718491	M06047_81_000000000CBLT5_1_1102_16010_19485	0.000923968	0.000247662	0.000142882	0.000742985	0.000352441	0.000514374	0.0021718	0.000457221	0.000114305	0.000685832	0.00154312	0.000571527	0.000514374	0.000114305	0.000171458	0.000514374	0.000171458	0	0.000228611	0.000171458	0.000114305	5.71527e-05	0.000171458	5.71527e-05	0.000514374	0	0.00125736	0.00245756	5.71527e-05	0.000685832	0.00085729	0.000171458	0.000171458	0.000171458	0.000685832	0.000228611	5.71527e-05	0.0010859
Otu00236	Bacteria;Firmicutes;Clostridia;Clostridiales;Ruminococcaceae;unclassified_Ruminococcaceae	Firmicutes	Clostridia	Clostridiales	Ruminococcaceae	unclassified_Ruminococcaceae	0.000717583	M06047_81_000000000CBLT5_1_2116_26167_6536	0.000304814	0.000466747	0.000185746	0.00140024	0.000581052	0.000657256	0.000171458	0.000171458	0.000685832	0.000400069	0.000228611	0.000171458	0.00085729	0.000285763	0.000400069	0.000685832	0.000285763	0.000285763	0.000114305	0.000228611	0.000342916	5.71527e-05	0.00114305	0.000571527	0.00257187	0.0010859	0.000571527	0.00245756	0.00142882	0.000400069	0.000114305	0.000285763	0.000342916	0.000914442	0.000571527	0.000571527	0.000171458	0.00131451
Otu00237	Bacteria;Firmicutes;Clostridia;Clostridiales;Lachnospiraceae;unclassified_Lachnospiraceae	Firmicutes	Clostridia	Clostridiales	Lachnospiraceae	unclassified_Lachnospiraceae	0.000717583	M06047_81_000000000CBLT5_1_1102_13229_20126	0.002248	0.000219085	4.28645e-05	0.000152407	0.000733459	0.00185746	0.000228611	0.00320055	0.000342916	0.00240041	0.00645825	0.00085729	0.000685832	5.71527e-05	0.000228611	0.000171458	0	0.000171458	0.000114305	0	5.71527e-05	0	5.71527e-05	5.71527e-05	5.71527e-05	0.000171458	0.000400069	0.000171458	5.71527e-05	0.000114305	0.000285763	0.000114305	0.000228611	0.00360062	5.71527e-05	0.000457221	0.00577242	0.00114305
Otu00238	Bacteria;Firmicutes;Clostridia;Clostridiales;Lachnospiraceae;Dorea	Firmicutes	Clostridia	Clostridiales	Lachnospiraceae	Dorea	0.000716676	C70117_71_000000000C45C2_1_1111_15016_15471	0.000762035	0.000266712	0.00015717	0.000847764	0.00107637	0.000671544	0.000800137	0.000571527	0.000628679	0.000628679	0.00120021	0.000742985	0.000514374	0.000114305	0.000285763	0.000400069	0.000114305	0.000171458	0.000285763	0.000285763	5.71527e-05	0	0.000285763	0.000342916	0.000171458	0.00131451	0.00245756	0.000514374	0.000285763	0.000400069	0.00257187	0.000800137	0.00165743	0.000742985	0.000114305	0.00085729	0.000800137	0.000914442
Otu00239	Bacteria;Firmicutes;Bacilli;Bacillales;Staphylococcaceae;Staphylococcus	Firmicutes	Bacilli	Bacillales	Staphylococcaceae	Staphylococcus	0.000711233	M01394_160_000000000C9RJW_1_2115_25028_11840	0	0	5.71527e-05	0.00145739	0.00172411	0.00105732	0	0	0	0	0	0	0	0	0	0	0	0	0.000114305	0	0	0.000114305	5.71527e-05	0.000114305	0.000457221	5.71527e-05	0.007487	0.000571527	0	0	0.00211465	0	0.00491513	0.00331485	0	0.00251472	0.00171458	0
Otu00240	Bacteria;Firmicutes;Clostridia;Clostridiales;Lachnospiraceae;unclassified_Lachnospiraceae	Firmicutes	Clostridia	Clostridiales	Lachnospiraceae	unclassified_Lachnospiraceae	0.000708511	M06047_81_000000000CBLT5_1_2114_25642_19704	0.000238136	0.000428645	8.5729e-05	0.00143834	0.000428645	0.00124307	0	0	0.000800137	0	0.000514374	0.000114305	0.00120021	0.000285763	0.000628679	0.000114305	0.000228611	0.000114305	0.000228611	0	5.71527e-05	5.71527e-05	0.000114305	0.000800137	0	0.000114305	0.000228611	0.00737269	0	0.000400069	0.000800137	0.000171458	0.000571527	0.000628679	0.00411499	0.000514374	0.000228611	0.000114305
Otu00241	Bacteria;Firmicutes;Clostridia;Clostridiales;Lachnospiraceae;Clostridium XlVb	Firmicutes	Clostridia	Clostridiales	Lachnospiraceae	Clostridium XlVb	0.000706697	M06047_81_000000000CBLT5_1_1116_20681_13857	0.00118115	0.000247662	5.71527e-05	0.000323865	0.000943019	0.0020575	0.000285763	0.00251472	0.00211465	0.000285763	0.00102875	0.00085729	5.71527e-05	0.000228611	0	0.000628679	0.000114305	0.000457221	0.000228611	0	0	0	0.000114305	0	0.000114305	0.000285763	0.00125736	0.000171458	0.000114305	0.000171458	0.0010859	0.000171458	0.00268617	0.00142882	5.71527e-05	0.0042293	0.00394353	0
Otu00242	Bacteria;Firmicutes;Clostridia;Clostridiales;unclassified_Clostridiales;	Firmicutes	Clostridia	Clostridiales	unclassified_Clostridiales		0.000703068	C70117_71_000000000C45C2_1_2101_24905_16320	0.000628679	0.000714408	0.000285763	0.000409594	0.00054295	0.00100017	0.000171458	0.000742985	0.00125736	0	0.000628679	0.000971595	0.00102875	0.00137166	0.000914442	0.000571527	0.000171458	0.000228611	0.00102875	5.71527e-05	5.71527e-05	0	0.000171458	0	0.000571527	0.000114305	0.000685832	0.000914442	0	0.000628679	0.0010859	0.000171458	0.000685832	0.000685832	0.00194319	0.00085729	0.00120021	0
Otu00243	Bacteria;Firmicutes;Clostridia;Clostridiales;Lachnospiraceae;unclassified_Lachnospiraceae	Firmicutes	Clostridia	Clostridiales	Lachnospiraceae	unclassified_Lachnospiraceae	0.000693997	M03062_107_000000000CBKND_1_2110_13620_16183	0.000276238	0.00281953	0.000742985	0	0.000990646	0.00100017	0.000742985	0.000228611	0.000285763	5.71527e-05	0.000114305	0.000228611	0.000228611	0.00400069	0.00211465	0.0021718	0.00788707	0.000514374	0.000228611	0.000342916	5.71527e-05	0.00234326	0	0	0	0	0	0	0.00291479	0.00120021	5.71527e-05	0.00177173	0	0	0.00394353	0	0	5.71527e-05
Otu00244	Bacteria;Firmicutes;Clostridia;Clostridiales;Lachnospiraceae;unclassified_Lachnospiraceae	Firmicutes	Clostridia	Clostridiales	Lachnospiraceae	unclassified_Lachnospiraceae	0.000687646	M06047_81_000000000CBLT5_1_2117_17745_9639	0.000285763	0.000276238	4.28645e-05	0.000771561	0.00246709	0.000771561	0.000114305	0.000400069	0.000228611	0.000171458	0.000457221	0.000342916	0.000171458	0.000571527	0.000114305	0.000285763	0	0.000514374	0.000114305	0	5.71527e-05	0	0.000914442	0.000457221	0.000171458	0.00171458	0.000457221	0.000914442	0.000342916	0.000457221	0.000400069	5.71527e-05	0.0121735	0.00137166	0.000228611	0.000742985	0.00188604	0.000228611
Otu00245	Bacteria;Firmicutes;Clostridia;Clostridiales;Ruminococcaceae;Oscillibacter	Firmicutes	Clostridia	Clostridiales	Ruminococcaceae	Oscillibacter	0.000685832	M06047_81_000000000CBLT5_1_1116_11219_19466	0.0015336	0.000342916	5.71527e-05	0.000381018	0.000800137	0.00161456	0.00120021	0.00297194	0.00188604	0.000171458	0.00142882	0.00154312	0.00102875	0.000342916	0.000114305	0.000400069	5.71527e-05	0.000114305	5.71527e-05	5.71527e-05	5.71527e-05	5.71527e-05	0	0	0.000114305	5.71527e-05	0.00200034	0.000114305	0	0.00085729	0.00188604	0.000171458	0.00131451	0.000571527	0.000514374	0.00182888	0.00394353	0.000171458
Otu00246	Bacteria;unclassified_Bacteria;;;;	unclassified_Bacteria					0.000681296	M06047_81_000000000CBLT5_1_2103_5333_16279	0.000704883	0.00135261	0.00210036	0.000295289	0.000495323	0.000928731	0.000228611	0.000285763	0.000400069	0.00245756	0.000514374	0.000342916	0.000628679	0.000914442	0.00125736	0.0021718	0.00120021	0.00194319	0.00125736	0.00251472	0.000342916	0.00428645	0.000514374	0.000228611	5.71527e-05	0.00085729	0.000114305	0	0.000914442	0.00120021	0.000114305	0.000571527	5.71527e-05	0.000114305	0.00348631	0	0	0.000228611
Otu00247	Bacteria;Firmicutes;Clostridia;Clostridiales;Ruminococcaceae;unclassified_Ruminococcaceae	Firmicutes	Clostridia	Clostridiales	Ruminococcaceae	unclassified_Ruminococcaceae	0.00067676	M06047_81_000000000CBLT5_1_1103_9035_5313	4.76272e-05	9.52544e-06	0.00102875	0.000457221	0.000514374	0.00158599	0	0.000228611	0	0	0	5.71527e-05	0	5.71527e-05	0	0	0	0	0.00400069	5.71527e-05	5.71527e-05	0	5.71527e-05	0	0	5.71527e-05	0.00262902	0	0.000114305	0	0.00165743	0.00125736	0	5.71527e-05	0.00600103	0.000114305	5.71527e-05	0.000171458
Otu00248	Bacteria;Firmicutes;Clostridia;Clostridiales;unclassified_Clostridiales;	Firmicutes	Clostridia	Clostridiales	unclassified_Clostridiales		0.000674038	C70117_71_000000000C45C2_1_1108_11616_11255	0.000990646	0.000990646	0.00121449	0.000400069	0.000552476	0.000257187	0.000971595	0.000742985	0.000342916	0.00194319	0.00085729	0.0010859	0.000514374	0.00085729	0.00102875	0.00137166	0.000685832	0.00148597	0.00120021	0.00154312	0.000114305	0.00200034	0.000228611	5.71527e-05	5.71527e-05	0.00188604	0.000171458	0	0.00142882	0.000457221	0.000228611	0.000914442	0.000228611	5.71527e-05	0.000571527	0.000114305	0	0.000342916
Otu00249	Bacteria;Firmicutes;Clostridia;Clostridiales;unclassified_Clostridiales;	Firmicutes	Clostridia	Clostridiales	unclassified_Clostridiales		0.000659523	M06047_81_000000000CBLT5_1_1117_5481_5920	5.71527e-05	0.000257187	0.00112876	0.00020956	0.00470557	0.000257187	0	0.000114305	0	0	0.000114305	0.000114305	0.000342916	0.000228611	0.000114305	0.000342916	0.000171458	0.000342916	0.000114305	0.00280048	0	0.00160027	0.000571527	5.71527e-05	0.000228611	0	0.000114305	0.000285763	0.0268046	0.000114305	0.000400069	0.000171458	0.000514374	0.000228611	5.71527e-05	0.000571527	0.000342916	5.71527e-05
Otu00250	Bacteria;Firmicutes;Clostridia;Clostridiales;Lachnospiraceae;Clostridium XlVa	Firmicutes	Clostridia	Clostridiales	Lachnospiraceae	Clostridium XlVa	0.000645916	M06047_81_000000000CBLT5_1_1102_17455_8283	0.00043817	0.000447696	1.42882e-05	0.000238136	0.000228611	0.000400069	0.000400069	0.000514374	0.000114305	0.000114305	0.0010859	0.000400069	0.000171458	0.00160027	0.000171458	0.000342916	0.000400069	0	5.71527e-05	0	0	0	0.000285763	0.000285763	5.71527e-05	0.000514374	0.000171458	0.000114305	0.000171458	0	0.000571527	0.000114305	0.000342916	0.000171458	5.71527e-05	0.00085729	0.000342916	0.000342916
Otu00251	Bacteria;Firmicutes;Clostridia;Clostridiales;Lachnospiraceae;unclassified_Lachnospiraceae	Firmicutes	Clostridia	Clostridiales	Lachnospiraceae	unclassified_Lachnospiraceae	0.000642287	M06047_81_000000000CBLT5_1_2110_15129_16712	0.000504848	0.000123831	0.000128593	0.00043817	0.00214322	0.00148597	0.000285763	0.00154312	0.000800137	0	0.000114305	0.000285763	5.71527e-05	0.000114305	0.000228611	0.000285763	0	5.71527e-05	0.000457221	0	5.71527e-05	0	0	0	5.71527e-05	0	0.00234326	0.000228611	0.000114305	0.00142882	0.00177173	0.000114305	0.000400069	0.00903012	0.000228611	0.00240041	0.00320055	0.000114305
Otu00252	Bacteria;Firmicutes;Clostridia;Clostridiales;Ruminococcaceae;unclassified_Ruminococcaceae	Firmicutes	Clostridia	Clostridiales	Ruminococcaceae	unclassified_Ruminococcaceae	0.000638658	M06047_81_000000000CBLT5_1_2111_4036_17470	0.00075251	0.00043817	0.000228611	0.000400069	0.000742985	0.000757273	0.000742985	0.000800137	0.00125736	0.000400069	0.000628679	0.000685832	0.000400069	0.000571527	0.000685832	0.000400069	0.000342916	0.000228611	0.000571527	0.000171458	0	0.000171458	0.000114305	0.000114305	0.000342916	0.000114305	0.00125736	0.000457221	0.000685832	0.000800137	0.000742985	0.000400069	0.000400069	0.00142882	0.000800137	0.000742985	0.00102875	0.000457221
Otu00253	Bacteria;Firmicutes;Clostridia;Clostridiales;Lachnospiraceae;unclassified_Lachnospiraceae	Firmicutes	Clostridia	Clostridiales	Lachnospiraceae	unclassified_Lachnospiraceae	0.000635029	M06047_81_000000000CBLT5_1_1111_8246_10254	0.000266712	6.66781e-05	0.000100017	0.00109543	0.000142882	4.28645e-05	0.000114305	0.000114305	0.000285763	0	0.000228611	0.00085729	0.000171458	0	0	0.000228611	0	0	0	0.000228611	5.71527e-05	0.000114305	0	5.71527e-05	0.000114305	0.00491513	0.00137166	0.000114305	0	0.000171458	0.000628679	5.71527e-05	0	0	0.000114305	0	0	5.71527e-05
Otu00254	Bacteria;Firmicutes;Clostridia;Clostridiales;Lachnospiraceae;unclassified_Lachnospiraceae	Firmicutes	Clostridia	Clostridiales	Lachnospiraceae	unclassified_Lachnospiraceae	0.000634122	M06047_81_000000000CBLT5_1_1119_5802_19328	8.5729e-05	0.000161933	8.5729e-05	2.85763e-05	0.000142882	0.000300051	0.000171458	0	0	0	0.000342916	0	0.000228611	0.000400069	0.000114305	0.000171458	5.71527e-05	0	0	0	0.000342916	0	0	5.71527e-05	5.71527e-05	0	5.71527e-05	0	0	0.000800137	0	5.71527e-05	0	0	0.0010859	0	0.000114305	0
Otu00255	Bacteria;Firmicutes;Clostridia;Clostridiales;Ruminococcaceae;unclassified_Ruminococcaceae	Firmicutes	Clostridia	Clostridiales	Ruminococcaceae	unclassified_Ruminococcaceae	0.000633215	M06047_81_000000000CBLT5_1_2114_6719_7095	0.000504848	0.000123831	0.000257187	0.000600103	0.000371492	0.00120021	0	0.00177173	0.000628679	5.71527e-05	0.000571527	0	0.000571527	5.71527e-05	0	0	5.71527e-05	5.71527e-05	0.00102875	0	0	0	0	0	0.00222895	0	0.000400069	0.000971595	0	0	0.000742985	5.71527e-05	0.000628679	0.000800137	5.71527e-05	0.00337201	0.000457221	0.000914442
Otu00256	Bacteria;Firmicutes;Clostridia;Clostridiales;Ruminococcaceae;Ruminococcus	Firmicutes	Clostridia	Clostridiales	Ruminococcaceae	Ruminococcus	0.00062505	M06047_81_000000000CBLT5_1_2110_10465_2198	0.000723934	0.00124783	0	2.85763e-05	0.00010478	1.42882e-05	0.000171458	5.71527e-05	0.000171458	0	0.00394353	0	0.000342916	5.71527e-05	0	0.00697262	5.71527e-05	5.71527e-05	0	0	0	0	5.71527e-05	5.71527e-05	0	5.71527e-05	0	0	5.71527e-05	0	0.000457221	5.71527e-05	0	5.71527e-05	0	0	5.71527e-05	0
Otu00257	Bacteria;Bacteroidetes;Bacteroidia;Bacteroidales;Porphyromonadaceae;Barnesiella	Bacteroidetes	Bacteroidia	Bacteroidales	Porphyromonadaceae	Barnesiella	0.000624143	C70117_71_000000000C45C2_1_2102_22914_7897	0.000609628	0.000304814	0.000428645	0.00120021	0.000133356	0.000228611	0.000114305	0.00120021	0.000914442	0.000400069	0.000228611	0.000800137	0.000742985	0.000628679	0.000114305	5.71527e-05	0.000285763	0	0.000914442	5.71527e-05	0.000228611	0.000514374	0	0	0.00240041	0.00131451	0.000171458	0.00331485	0.000114305	0.000285763	0.000114305	0	5.71527e-05	0.000228611	0.000114305	0.000514374	0	0.000285763
Otu00258	Bacteria;Firmicutes;Clostridia;Clostridiales;unclassified_Clostridiales;	Firmicutes	Clostridia	Clostridiales	unclassified_Clostridiales		0.000621422	C70117_71_000000000C45C2_1_1119_20270_14408	0.000257187	0.000428645	0.000228611	2.85763e-05	2.85763e-05	0.000342916	0.000285763	0	0	0	0.00114305	0.000114305	5.71527e-05	0.00137166	0.000628679	5.71527e-05	0.000457221	0	0.000742985	0.000171458	0	0	0	0	0.000114305	0	5.71527e-05	0	0	0	0	0	0	0.000171458	5.71527e-05	0.000171458	0.00114305	0
Otu00259	Bacteria;Firmicutes;Clostridia;Clostridiales;Clostridiaceae 1;Clostridium sensu stricto	Firmicutes	Clostridia	Clostridiales	Clostridiaceae 1	Clostridium sensu stricto	0.000621422	M03062_107_000000000CBKND_1_2113_10935_3995	1.90509e-05	0.000933493	0.00085729	0.0010478	0.00100017	0.00428645	5.71527e-05	0	0	0	5.71527e-05	0	0.000228611	0.000285763	0.00302909	0.00148597	5.71527e-05	0.000514374	0.00291479	5.71527e-05	0.000228611	0.000228611	0	0.000114305	0.00354346	5.71527e-05	0	0.00257187	0.00142882	0.00445791	5.71527e-05	0	5.71527e-05	0	0.011602	0	5.71527e-05	0.00548665
Otu00260	Bacteria;Bacteroidetes;Bacteroidia;Bacteroidales;unclassified_Bacteroidales;	Bacteroidetes	Bacteroidia	Bacteroidales	unclassified_Bacteroidales		0.000617793	M06047_81_000000000CBLT5_1_2111_10387_10285	0.000914442	0.000666781	0.000657256	0.00161933	0.000714408	0.000485798	0.000571527	0.000571527	0.00154312	0.000971595	0.000571527	0.00125736	0.000114305	0.000171458	0.000171458	5.71527e-05	0.000285763	0.00320055	0.000971595	0.00142882	0.000114305	0.000114305	0.00182888	0.00182888	0.0021718	0.000628679	0.000285763	0.00297194	0.000914442	0.000971595	0.000228611	0.0010859	0.0010859	0	0.000914442	0.000628679	0.000285763	0.000114305
Otu00261	Bacteria;Firmicutes;Clostridia;Clostridiales;Ruminococcaceae;Oscillibacter	Firmicutes	Clostridia	Clostridiales	Ruminococcaceae	Oscillibacter	0.000610536	C70117_71_000000000C45C2_1_2107_22059_23750	0.00119068	0.000733459	0.000214322	0.000809663	0.00111448	0.00105732	0.00222895	0.000742985	0.000685832	0.00114305	0.000571527	0.00177173	0.000571527	0.00251472	0.000285763	0.000628679	0.000285763	0.000114305	0.000514374	5.71527e-05	0.000171458	0.000114305	5.71527e-05	5.71527e-05	0.00120021	0.00177173	0.000571527	0.00120021	0	0.00320055	0.000514374	5.71527e-05	0.00228611	0.000628679	5.71527e-05	0.00268617	0.000914442	0.000571527
Otu00262	Bacteria;Bacteroidetes;Bacteroidia;Bacteroidales;Porphyromonadaceae;Butyricimonas	Bacteroidetes	Bacteroidia	Bacteroidales	Porphyromonadaceae	Butyricimonas	0.000608721	C70117_71_000000000C45C2_1_2115_18984_11847	0.000200034	0.000895392	0.00208607	0.00123831	0.00125736	0.000471509	5.71527e-05	0.000114305	0.000342916	0.000228611	0.000114305	0.000342916	5.71527e-05	0.000742985	0.000800137	0.000342916	0.000342916	0.00308624	0.000342916	0.00417214	5.71527e-05	0.00377208	0.00188604	0.00188604	0.000114305	0.00320055	0.000285763	5.71527e-05	0.00160027	0.000742985	0.000457221	0.00440075	0.000228611	0.000114305	0.00148597	0	0.000171458	0.000228611
Otu00263	Bacteria;Firmicutes;Clostridia;Clostridiales;Ruminococcaceae;Flavonifractor	Firmicutes	Clostridia	Clostridiales	Ruminococcaceae	Flavonifractor	0.000608721	M06047_81_000000000CBLT5_1_2119_7344_21746	0.000600103	0.000114305	0.000185746	0.000381018	0.000828713	0.00125736	0.000914442	0.000685832	0.000514374	0	0.00114305	0.000342916	0	0	0.000228611	0.000171458	5.71527e-05	0.000228611	0.000685832	5.71527e-05	0	0	0.000628679	0.000171458	5.71527e-05	0.000228611	0.00085729	0.000342916	0	0.000400069	0.000742985	0.000342916	0.000457221	0.00302909	0.000228611	0.0043436	0.000228611	0.000228611
Otu00264	Bacteria;Firmicutes;Clostridia;Clostridiales;Lachnospiraceae;unclassified_Lachnospiraceae	Firmicutes	Clostridia	Clostridiales	Lachnospiraceae	unclassified_Lachnospiraceae	0.000607814	C70117_71_000000000C45C2_1_2116_21434_19395	0.00140977	0.000742985	0.000142882	0.000152407	0.000361967	0.000285763	0.000228611	5.71527e-05	0.00085729	0.000457221	0.00508659	0.00177173	0.00171458	0.00194319	0.000342916	0.000457221	0	0	0.000228611	0	0.000285763	5.71527e-05	5.71527e-05	0.000228611	0.000342916	0	5.71527e-05	0.000228611	0	0.000685832	0.000400069	0	0.000685832	0.000400069	0.000514374	0.000171458	0.000285763	0.000171458
Otu00265	Bacteria;Firmicutes;Clostridia;Clostridiales;Lachnospiraceae;Lachnospiracea_incertae_sedis	Firmicutes	Clostridia	Clostridiales	Lachnospiraceae	Lachnospiracea_incertae_sedis	0.000603278	M06047_81_000000000CBLT5_1_1119_10086_8718	0.00170505	0.000133356	0.000500086	0.00020956	0.00043817	0.00190033	0.000457221	0	0.000514374	0	0.000171458	0.00908727	5.71527e-05	0.000457221	0	5.71527e-05	0.000171458	5.71527e-05	0.00154312	5.71527e-05	0.000228611	0.000171458	0	0	0.000571527	0.000228611	0.000171458	0.000285763	5.71527e-05	0.000171458	0.000228611	5.71527e-05	0.00137166	0.000742985	0.000171458	0.00582957	0.000171458	0.00142882
Otu00266	Bacteria;Proteobacteria;Deltaproteobacteria;Desulfovibrionales;Desulfovibrionaceae;unclassified_Desulfovibrionaceae	Proteobacteria	Deltaproteobacteria	Desulfovibrionales	Desulfovibrionaceae	unclassified_Desulfovibrionaceae	0.000596021	M06047_81_000000000CBLT5_1_2113_23225_15851	0.00229563	0.00211465	0.000214322	0.000361967	0.000447696	0.000185746	0.0076013	0.000171458	0.00331485	0.00125736	0.000914442	0.000514374	0.00354346	0.0053152	0.00102875	0.00228611	0.000285763	0.000228611	0.000400069	5.71527e-05	0.000228611	0.000171458	0	0.000114305	0.0010859	0.000457221	0.000285763	0.000228611	0.000114305	0.000628679	0.000571527	0.000171458	0.000628679	0.000571527	5.71527e-05	0.000171458	0.000457221	5.71527e-05
Otu00267	Bacteria;Firmicutes;Clostridia;Clostridiales;Ruminococcaceae;Ruminococcus	Firmicutes	Clostridia	Clostridiales	Ruminococcaceae	Ruminococcus	0.000591485	M06047_81_000000000CBLT5_1_2115_7348_5428	2.85763e-05	0	0	0	1.90509e-05	2.85763e-05	0	0	0	5.71527e-05	0	0.000114305	0	0	0	0	0	0	0	0	0	0	0	0	0	0	0	0	5.71527e-05	0	0	0	5.71527e-05	0	0	0	5.71527e-05	5.71527e-05
Otu00268	Bacteria;Bacteroidetes;Bacteroidia;Bacteroidales;Porphyromonadaceae;unclassified_Porphyromonadaceae	Bacteroidetes	Bacteroidia	Bacteroidales	Porphyromonadaceae	unclassified_Porphyromonadaceae	0.000587856	M06047_81_000000000CBLT5_1_2107_23575_14828	0.000495323	1.90509e-05	0	0.000247662	0.000581052	0.000200034	0.000800137	0.000171458	0.000228611	0.000457221	0.000228611	0.0010859	0.000114305	0	0	0	0	0	0	0	0	0	0.000457221	0.000342916	0.000228611	0.000114305	0.000171458	0.000171458	0	0	5.71527e-05	0	0.00297194	0.000457221	5.71527e-05	5.71527e-05	0.000285763	0.000400069
Otu00269	Bacteria;Proteobacteria;Deltaproteobacteria;Desulfovibrionales;Desulfovibrionaceae;Desulfovibrio	Proteobacteria	Deltaproteobacteria	Desulfovibrionales	Desulfovibrionaceae	Desulfovibrio	0.000586949	C70117_71_000000000C45C2_1_2119_10217_21274	0.000409594	0.000847764	0.00112876	0.00075251	0.000533425	0.000185746	0.000400069	0.000342916	0.000171458	0.000400069	0.000628679	0.000514374	0.000285763	0.00280048	5.71527e-05	0.000628679	0.000285763	0.00102875	0.000400069	0.0021718	5.71527e-05	0.00188604	0.000914442	0.000514374	0.000571527	0.00131451	0.000457221	0.000742985	0.0010859	5.71527e-05	0.000342916	0.000571527	0.00085729	0.000285763	0.000171458	0.000228611	0.000114305	0.000228611
Otu00270	Bacteria;Firmicutes;Clostridia;Clostridiales;Lachnospiraceae;unclassified_Lachnospiraceae	Firmicutes	Clostridia	Clostridiales	Lachnospiraceae	unclassified_Lachnospiraceae	0.000586042	M06047_81_000000000CBLT5_1_1114_4417_9499	0.00352441	0.000133356	0	0.000238136	0.000276238	0.000528662	0.00645825	0.00417214	0.00451506	0.000571527	0.00360062	0.00182888	0.000114305	0.000114305	0.000114305	0.000114305	0.000285763	5.71527e-05	0	0	0	0	0	5.71527e-05	0	0.000285763	0.000971595	0.000114305	0	0.000228611	0.000514374	0.000114305	0.000114305	0.000685832	0	0.000457221	0.00165743	0
Otu00271	Bacteria;Firmicutes;unclassified_Firmicutes;;;	Firmicutes	unclassified_Firmicutes				0.000585134	M06047_81_000000000CBLT5_1_2111_17622_10884	0.00103827	9.52544e-06	7.14408e-05	2.85763e-05	1.90509e-05	2.85763e-05	0.00148597	0.000400069	0	0	0.00177173	0.00257187	0	0	0	0	5.71527e-05	0	0.000228611	5.71527e-05	0	0	0	0	5.71527e-05	5.71527e-05	0	5.71527e-05	0	5.71527e-05	5.71527e-05	0	0	0	0	0.000114305	0	0
Otu00272	Bacteria;Firmicutes;Clostridia;Clostridiales;Lachnospiraceae;unclassified_Lachnospiraceae	Firmicutes	Clostridia	Clostridiales	Lachnospiraceae	unclassified_Lachnospiraceae	0.00058332	M06047_81_000000000CBLT5_1_2111_11272_19961	0.000114305	0.00206702	0.000671544	0	0.00250519	0.000828713	5.71527e-05	0.000114305	0.000228611	0	5.71527e-05	0.000228611	0.000571527	0.00285763	0.000171458	0.000514374	0.00451506	0.00377208	0.000171458	0.000628679	0	0.00188604	0	0	0	0	0	0	0.000171458	0.000171458	0	0.0146882	0	0	0.00308624	5.71527e-05	0	0.000171458
Otu00273	Bacteria;Firmicutes;Clostridia;Clostridiales;Lachnospiraceae;unclassified_Lachnospiraceae	Firmicutes	Clostridia	Clostridiales	Lachnospiraceae	unclassified_Lachnospiraceae	0.000579691	M06047_81_000000000CBLT5_1_2109_17659_9749	0.000895392	0.000171458	1.42882e-05	0.000171458	0.000838239	0.000342916	0.000685832	0.00148597	0.00120021	0.000685832	0.000914442	0.000400069	0.000171458	0.000171458	5.71527e-05	0.000628679	0	0	0	0	5.71527e-05	0	0	0.000228611	0.000171458	5.71527e-05	0.000457221	0.000114305	5.71527e-05	0.000114305	0.000171458	0	0.00462937	5.71527e-05	0	0.000742985	0.000571527	5.71527e-05
Otu00274	Bacteria;Firmicutes;Clostridia;Clostridiales;Ruminococcaceae;unclassified_Ruminococcaceae	Firmicutes	Clostridia	Clostridiales	Ruminococcaceae	unclassified_Ruminococcaceae	0.000571527	M06047_81_000000000CBLT5_1_2104_3901_12595	0.000514374	0.000619154	0.000142882	0.000695357	0.000381018	0.000500086	0.000628679	0.000628679	0.000514374	0.000342916	0.000514374	0.000457221	0.000742985	0.000457221	0.000628679	0.00085729	0.000685832	0.000342916	0.000285763	0.000114305	0.000171458	0	0.00114305	0.000914442	0.000628679	0.000514374	0.000342916	0.000628679	0.000285763	0.000628679	5.71527e-05	0.000342916	0.000285763	0.000685832	0.000400069	0.000342916	5.71527e-05	0.00120021
Otu00275	Bacteria;Firmicutes;Clostridia;Clostridiales;Ruminococcaceae;unclassified_Ruminococcaceae	Firmicutes	Clostridia	Clostridiales	Ruminococcaceae	unclassified_Ruminococcaceae	0.000566991	M06047_81_000000000CBLT5_1_1108_20667_13436	0.000609628	0.000257187	4.28645e-05	0.000581052	0.000838239	0.000571527	0.000457221	0.00114305	0.000628679	0	0.000571527	0.00085729	0.000514374	0.000342916	0.000285763	0.000228611	0.000114305	5.71527e-05	0.000114305	0	0	5.71527e-05	0.000114305	0	0	0.000114305	0.00297194	0.000285763	0	0.000114305	0.00291479	5.71527e-05	0.00114305	0.000800137	0.000228611	0.000971595	0.000914442	0.000171458
Otu00276	Bacteria;Firmicutes;Clostridia;Clostridiales;Lachnospiraceae;unclassified_Lachnospiraceae	Firmicutes	Clostridia	Clostridiales	Lachnospiraceae	unclassified_Lachnospiraceae	0.000559733	C70117_71_000000000C45C2_1_2111_16453_21186	0.000323865	0.000266712	1.42882e-05	0.00233373	0.00208607	0.000714408	0	0.000114305	0	0	0.00131451	0.000514374	0.000171458	0.000114305	0.000228611	0.000914442	5.71527e-05	0.000114305	0	0	0	5.71527e-05	5.71527e-05	0.000514374	0	0.000114305	0.0132023	0.000114305	5.71527e-05	5.71527e-05	0.0105732	5.71527e-05	0.000514374	0.00125736	0	0.000457221	0.00114305	0.00125736
Otu00277	Bacteria;Firmicutes;Clostridia;Clostridiales;Lachnospiraceae;unclassified_Lachnospiraceae	Firmicutes	Clostridia	Clostridiales	Lachnospiraceae	unclassified_Lachnospiraceae	0.00055429	M03062_107_000000000CBKND_1_2105_18135_7343	9.52544e-05	0.00236231	0.000485798	0.000142882	0.000704883	0.000100017	0	0.000114305	0.000114305	0	5.71527e-05	0.000285763	0.000342916	0	0.000514374	0.000914442	0.0117734	0.000628679	0.00137166	0.000171458	0	0.000400069	5.71527e-05	0	0	0	0.000742985	5.71527e-05	0	0.000228611	0.000342916	0.00365777	0	0	0.000285763	5.71527e-05	0	5.71527e-05
Otu00278	Bacteria;Bacteroidetes;Bacteroidia;Bacteroidales;Prevotellaceae;Prevotella	Bacteroidetes	Bacteroidia	Bacteroidales	Prevotellaceae	Prevotella	0.00055429	M06047_81_000000000CBLT5_1_2104_27703_12217	0.00139071	0.000190509	7.14408e-05	0.00100017	0.000704883	0.00105732	0.00502943	0.000400069	0.000514374	0.00102875	0.000685832	0.000685832	0	0	0.000685832	0.000285763	0.000114305	5.71527e-05	5.71527e-05	5.71527e-05	5.71527e-05	0.000114305	0.000285763	0.000114305	0.00182888	0.000114305	0.000114305	0.00354346	0.000342916	0.000342916	5.71527e-05	0.000114305	0.00240041	0.000971595	0.000114305	0.000114305	0.00354346	0.000457221
Otu00279	Bacteria;Firmicutes;Bacilli;Lactobacillales;Enterococcaceae;Enterococcus	Firmicutes	Bacilli	Lactobacillales	Enterococcaceae	Enterococcus	0.00055429	C70117_71_000000000C45C2_1_1101_15391_9352	0.000809663	0.000619154	0.000128593	0.000666781	0.000904917	0.000471509	0.000685832	0.000914442	0.000285763	0.000171458	0.000571527	0.00222895	5.71527e-05	0.000628679	0.000914442	0.000685832	0.000571527	0.00085729	0.000400069	5.71527e-05	0	5.71527e-05	0.000228611	0.000342916	0.000114305	0.00331485	0	0	0.00240041	0.00194319	0	0.0010859	0	0	0.000514374	0	5.71527e-05	0.00131451
Otu00280	Bacteria;Firmicutes;Clostridia;Clostridiales;unclassified_Clostridiales;	Firmicutes	Clostridia	Clostridiales	unclassified_Clostridiales		0.000553383	M06047_81_000000000CBLT5_1_2115_10264_4146	0.000628679	0.000714408	0.000428645	0.000390543	0.000133356	0.000685832	0.000342916	0.000971595	0.000742985	0.00114305	0.000171458	0.000400069	0.000742985	0.00114305	0.000971595	0.0010859	0.000342916	0	0.00160027	0	0.000114305	0	0.000171458	0.000114305	0.00102875	0	0.000457221	0.000571527	0	5.71527e-05	0.000171458	0	5.71527e-05	0.000514374	0.000971595	5.71527e-05	0.00160027	0.000114305
Otu00281	Bacteria;Firmicutes;Clostridia;Clostridiales;Lachnospiraceae;Blautia	Firmicutes	Clostridia	Clostridiales	Lachnospiraceae	Blautia	0.000550661	M01394_160_000000000C9RJW_1_2119_19375_21505	0.000123831	0.00401974	0.000200034	4.76272e-05	0.000838239	2.85763e-05	0	0.000285763	0	0	0.000171458	0.000285763	0.000514374	0.00674401	0.000285763	0.000571527	0.0156027	0.000400069	0.000171458	0.000400069	0	0.000228611	0.000114305	0	0	0	0.000114305	5.71527e-05	0.00417214	0.000342916	0.000114305	0.000171458	5.71527e-05	0.000171458	0	5.71527e-05	5.71527e-05	0
Otu00282	Bacteria;Firmicutes;Clostridia;Clostridiales;Ruminococcaceae;unclassified_Ruminococcaceae	Firmicutes	Clostridia	Clostridiales	Ruminococcaceae	unclassified_Ruminococcaceae	0.000549754	M01394_160_000000000C9RJW_1_2111_23375_9013	0.000276238	4.76272e-05	7.14408e-05	0.000876341	0.0016479	0.00300051	0.000457221	0.000228611	0.000114305	0.000171458	0.000285763	0.000400069	0.000114305	5.71527e-05	5.71527e-05	0	5.71527e-05	0	0.000171458	0	0.000114305	0	0	5.71527e-05	0.000228611	0.000114305	0.00428645	0.000571527	0	5.71527e-05	0.00480082	5.71527e-05	0.00120021	0.00377208	0.000228611	0.00822998	0.00337201	0.000171458
Otu00283	Bacteria;Firmicutes;Clostridia;Clostridiales;Lachnospiraceae;unclassified_Lachnospiraceae	Firmicutes	Clostridia	Clostridiales	Lachnospiraceae	unclassified_Lachnospiraceae	0.000549754	C70117_71_000000000C45C2_1_2118_21334_14740	0.000781086	0.000419119	5.71527e-05	0.000447696	0.000600103	0.00140024	0.000228611	0.00262902	0.000171458	0.000114305	0.0010859	0.000457221	0.000800137	0.000571527	0.000228611	0.000685832	0.000171458	5.71527e-05	0.000114305	0	5.71527e-05	5.71527e-05	5.71527e-05	5.71527e-05	0.000171458	0.000171458	0.0020575	0.000171458	0	0.000228611	0.00177173	0.000114305	0.000628679	0.00085729	5.71527e-05	0.00200034	0.0031434	0.000400069
Otu00284	Bacteria;Firmicutes;Clostridia;Clostridiales;Lachnospiraceae;unclassified_Lachnospiraceae	Firmicutes	Clostridia	Clostridiales	Lachnospiraceae	unclassified_Lachnospiraceae	0.000548847	M06047_81_000000000CBLT5_1_2104_18803_6006	2.85763e-05	0.000400069	0.0019289	0.000161933	0.00295289	0.000414357	0	0.000114305	5.71527e-05	0	0	0	0.000114305	0	0.000171458	0.000114305	0.00188604	0.000114305	5.71527e-05	0.00388638	0.00257187	0.00120021	0	0	0	0.000457221	0.000514374	0	0.00765846	0.00628679	0.000457221	0.0032577	0	5.71527e-05	0.00154312	0	0	0.000114305
Otu00285	Bacteria;Firmicutes;Clostridia;Clostridiales;Ruminococcaceae;unclassified_Ruminococcaceae	Firmicutes	Clostridia	Clostridiales	Ruminococcaceae	unclassified_Ruminococcaceae	0.000545218	C70117_71_000000000C45C2_1_1111_11994_9464	0.000371492	0.000200034	0.000128593	0.000523899	0.000600103	0.00121449	0	0.000971595	0.000171458	0.000171458	0.000285763	0.000628679	0.000742985	0	5.71527e-05	0.000114305	0.000228611	5.71527e-05	0.000285763	0	0	0.000228611	0.000400069	0.000285763	0.000114305	0.000114305	0.00177173	0.000457221	5.71527e-05	0.000914442	0.00165743	0	0.000342916	0.000628679	0.000171458	0.00228611	0.00085729	0.00154312
Otu00286	Bacteria;Firmicutes;Clostridia;Clostridiales;Ruminococcaceae;unclassified_Ruminococcaceae	Firmicutes	Clostridia	Clostridiales	Ruminococcaceae	unclassified_Ruminococcaceae	0.000544311	M06047_81_000000000CBLT5_1_2113_12888_6290	0.000943019	0.000619154	0.000242899	0.000581052	0.000323865	0.000657256	0.000114305	0.000742985	0.00142882	0.000800137	0.00148597	0.0010859	0.000342916	0.000685832	0.0010859	0.0010859	0.000285763	0.000228611	0.00085729	0	5.71527e-05	5.71527e-05	0.000514374	0.000342916	0.000514374	0.00085729	0.000514374	0.000742985	0	0.000228611	0.00114305	0.000171458	5.71527e-05	0.000342916	0.00182888	0.000342916	0.000342916	0.000114305
Otu00287	Bacteria;Firmicutes;Clostridia;Clostridiales;Lachnospiraceae;unclassified_Lachnospiraceae	Firmicutes	Clostridia	Clostridiales	Lachnospiraceae	unclassified_Lachnospiraceae	0.000543404	C70117_71_000000000C45C2_1_1101_6599_8779	0.000190509	7.62035e-05	1.42882e-05	0.00010478	0.0026957	0.000285763	0	0.000400069	0.000171458	5.71527e-05	0.000514374	0	0	0	0	0.000400069	5.71527e-05	0	5.71527e-05	0	0	0	5.71527e-05	0	5.71527e-05	0.000114305	0.000228611	0.000171458	0	5.71527e-05	0.000342916	0	0.0154884	0.000285763	0	0.000457221	0.000685832	0
Otu00288	Bacteria;Firmicutes;Clostridia;Clostridiales;Ruminococcaceae;unclassified_Ruminococcaceae	Firmicutes	Clostridia	Clostridiales	Ruminococcaceae	unclassified_Ruminococcaceae	0.000538868	M06047_81_000000000CBLT5_1_2105_22705_7936	0.000790612	0.00020956	0.00015717	0.000838239	0.000295289	0.000814425	0.000228611	0.000800137	0.000171458	0.00131451	0.00120021	0.00102875	0.000171458	0.000114305	0.000514374	0.000285763	0.000114305	5.71527e-05	0.000514374	5.71527e-05	5.71527e-05	0	0.000628679	0.000457221	0.000285763	0.000914442	0.000971595	0.00177173	5.71527e-05	0.000171458	0.000342916	5.71527e-05	0.000400069	0.000742985	0.000514374	0.00114305	0.000685832	0.000914442
Otu00289	Bacteria;Firmicutes;Clostridia;Clostridiales;Ruminococcaceae;Ruminococcus	Firmicutes	Clostridia	Clostridiales	Ruminococcaceae	Ruminococcus	0.000535239	C70117_71_000000000C45C2_1_2108_25197_18426	0.000219085	0.00283858	0.00178602	0.00031434	0.000361967	0.000142882	5.71527e-05	0	0.000342916	0.000171458	0	0.000742985	0.000628679	0.000742985	0.00994456	0.00525804	0.000342916	0.000114305	0.000114305	0.00337201	5.71527e-05	0.00360062	0.000571527	0.00085729	0	5.71527e-05	0.000228611	0.000171458	0.000342916	0.000400069	0.000457221	5.71527e-05	0.000342916	0.000571527	0.000171458	0.000114305	0.000285763	0
Otu00290	Bacteria;Firmicutes;Clostridia;Clostridiales;unclassified_Clostridiales;	Firmicutes	Clostridia	Clostridiales	unclassified_Clostridiales		0.000534332	M06047_81_000000000CBLT5_1_1107_13856_5560	0.000276238	0.000828713	0.000142882	4.76272e-05	0.000295289	0.000300051	0.000342916	0.000514374	5.71527e-05	0.000171458	0	0.000571527	0.000285763	0.000400069	0.00274333	0.00125736	0.000171458	0.000114305	0.000457221	5.71527e-05	5.71527e-05	0	0	0	5.71527e-05	0	0.000228611	0	5.71527e-05	0.000742985	0.000342916	0	0.000457221	0.000171458	0.000742985	0.000285763	0.000171458	0
Otu00291	Bacteria;Firmicutes;Clostridia;Clostridiales;Ruminococcaceae;Sporobacter	Firmicutes	Clostridia	Clostridiales	Ruminococcaceae	Sporobacter	0.000534332	M06047_81_000000000CBLT5_1_2113_15320_14197	0.000800137	0.000914442	0.000471509	0.000581052	0.000476272	0.000714408	0.000457221	0.0010859	0.000800137	0.000685832	0.000685832	0.0010859	0.00148597	0.00142882	0.000800137	0.000628679	0.000514374	0.000628679	0.000628679	0.000628679	0.000171458	0.000457221	0.000228611	0.000114305	0.00125736	0.000628679	0.000342916	0.000914442	0.000228611	0.000685832	0.000571527	0.000285763	0.000571527	0.000514374	0.00125736	0.000514374	0.000342916	0.000742985
Otu00292	Bacteria;Firmicutes;Clostridia;Clostridiales;Ruminococcaceae;unclassified_Ruminococcaceae	Firmicutes	Clostridia	Clostridiales	Ruminococcaceae	unclassified_Ruminococcaceae	0.000534332	M06047_81_000000000CBLT5_1_2118_24932_17442	4.76272e-05	0.000781086	0.00365777	0.00031434	0.00054295	0.000228611	0	5.71527e-05	0	0.000114305	0.000114305	0	5.71527e-05	0.000228611	0.000457221	0.000114305	0.00125736	0.00257187	0.000800137	0.0124593	5.71527e-05	0.00131451	0.000114305	5.71527e-05	0.000685832	0.000114305	0.000228611	0.000685832	0.000971595	0.000114305	0.000228611	0.0010859	0.000742985	0.000114305	0.000342916	0	0.000514374	5.71527e-05
Otu00293	Bacteria;Firmicutes;Clostridia;Clostridiales;unclassified_Clostridiales;	Firmicutes	Clostridia	Clostridiales	unclassified_Clostridiales		0.000529796	M06047_81_000000000CBLT5_1_2119_22124_20016	0.000352441	0.00193366	0.000914442	0.000133356	0.00102875	0.000657256	5.71527e-05	0.000400069	0.000742985	0.000514374	0.000285763	0.000114305	0.000800137	0.00308624	0.00171458	0.0020575	0.0020575	0.00188604	0.00085729	0.000685832	0	0.00211465	0	0	0	0.000400069	0.000400069	0	0.00148597	0.00125736	0.000457221	0.00291479	5.71527e-05	0	0.00240041	0.000171458	0	5.71527e-05
Otu00294	Bacteria;Bacteroidetes;Bacteroidia;Bacteroidales;Porphyromonadaceae;unclassified_Porphyromonadaceae	Bacteroidetes	Bacteroidia	Bacteroidales	Porphyromonadaceae	unclassified_Porphyromonadaceae	0.000528889	M06047_81_000000000CBLT5_1_2116_16615_8630	0.000904917	0.000142882	0	0.00010478	9.52544e-05	2.85763e-05	0.00120021	0.000171458	0.000285763	0.000914442	0.000114305	0.00274333	0.000514374	5.71527e-05	5.71527e-05	0	5.71527e-05	0.000171458	0	0	0	0	0	0.000228611	5.71527e-05	0.000285763	5.71527e-05	0	0.000114305	5.71527e-05	5.71527e-05	0	0	0.000342916	0	0	0.000114305	0
Otu00295	Bacteria;Bacteroidetes;Bacteroidia;Bacteroidales;Porphyromonadaceae;unclassified_Porphyromonadaceae	Bacteroidetes	Bacteroidia	Bacteroidales	Porphyromonadaceae	unclassified_Porphyromonadaceae	0.000527074	C70117_71_000000000C45C2_1_2103_20390_7734	0.000590577	0.000152407	0.000128593	0.000219085	0.000295289	0.000271475	0.000342916	0.00188604	0.000571527	0.000457221	0.000228611	5.71527e-05	0.000285763	0.000114305	0	0.000228611	5.71527e-05	0.000228611	0.000400069	0	0.000114305	0	5.71527e-05	0	5.71527e-05	0.000114305	0.0010859	0	0.000114305	0.000285763	0.000571527	0	0.000800137	0	0.000171458	0.000571527	0.000114305	0.000228611
Otu00296	Bacteria;Firmicutes;Clostridia;Clostridiales;Lachnospiraceae;Blautia	Firmicutes	Clostridia	Clostridiales	Lachnospiraceae	Blautia	0.000524353	M06047_81_000000000CBLT5_1_2111_17553_11583	0.000257187	0.000514374	0.000814425	0.000152407	0.000447696	0.000114305	0.000171458	0.000228611	0.000742985	0.000285763	5.71527e-05	5.71527e-05	0.000571527	0.000457221	0.000685832	0.000228611	0.000342916	0.000800137	0.00114305	0.00125736	5.71527e-05	0.000800137	5.71527e-05	0	5.71527e-05	0.000457221	0.000114305	0.000228611	0.00125736	0.00085729	0	0.000571527	0	0	0.000457221	0	0	0
Otu00297	Bacteria;Bacteroidetes;Bacteroidia;Bacteroidales;Porphyromonadaceae;unclassified_Porphyromonadaceae	Bacteroidetes	Bacteroidia	Bacteroidales	Porphyromonadaceae	unclassified_Porphyromonadaceae	0.000519817	C70117_71_000000000C45C2_1_2110_19510_17249	0.000371492	0.000342916	0.00015717	0.00151455	0.000476272	0.000471509	0.000228611	0.000571527	0.000628679	0.000114305	0.000400069	0.000285763	0.000685832	0.000514374	0.000400069	5.71527e-05	0.000285763	0.000114305	0.000171458	0	0.000285763	0.000171458	0.00171458	0.000628679	0.00291479	0.000628679	0.00085729	0.00234326	0.000342916	0.000171458	0.0010859	0.000114305	0.000457221	0.000685832	0.000114305	0.000914442	0.000514374	0.000342916
Otu00298	Bacteria;Firmicutes;Clostridia;Clostridiales;unclassified_Clostridiales;	Firmicutes	Clostridia	Clostridiales	unclassified_Clostridiales		0.000516188	M06047_81_000000000CBLT5_1_2103_22093_9350	0.000409594	0.000914442	0.0014431	0.000695357	0.00075251	0.000671544	0.000228611	0.000171458	0.00085729	0.00085729	0.000228611	0.000114305	0.000571527	0.00171458	0.000114305	0.000114305	0.00182888	0.00114305	0.000914442	0.000514374	0	0.0043436	0.000685832	0.000342916	0.000457221	0.00251472	0.000114305	5.71527e-05	0.00137166	0.00165743	0.000342916	0.000971595	5.71527e-05	0.000114305	0.00262902	5.71527e-05	0	0
Otu00299	Bacteria;Firmicutes;Clostridia;Clostridiales;Lachnospiraceae;unclassified_Lachnospiraceae	Firmicutes	Clostridia	Clostridiales	Lachnospiraceae	unclassified_Lachnospiraceae	0.00051256	M06047_81_000000000CBLT5_1_1114_10131_10456	0.000257187	0.000247662	0	0.000295289	0.00300051	0.000271475	0.000171458	0.000171458	0.000228611	5.71527e-05	0.000571527	0.000342916	0	0.000114305	5.71527e-05	0.00102875	0.000114305	0.000171458	0	0	0	0	0	5.71527e-05	5.71527e-05	0.000228611	0.000971595	0.000457221	5.71527e-05	0.000457221	0.000628679	0.000228611	0.0159456	0.000685832	0	0.000685832	0.000400069	0
Otu00300	Bacteria;Firmicutes;Clostridia;Clostridiales;Clostridiales_Incertae Sedis XIII;Anaerovorax	Firmicutes	Clostridia	Clostridiales	Clostridiales_Incertae Sedis XIII	Anaerovorax	0.000508931	M06047_81_000000000CBLT5_1_1106_10329_3075	0.000409594	0.000695357	0.000214322	0.000361967	0.00103827	0.000571527	0.000171458	0.000171458	0.000457221	0.000285763	0.000342916	0.00102875	0.00131451	0.000571527	0.000571527	0.000742985	0.000514374	0.000457221	0.000342916	0.000114305	0.000400069	0	5.71527e-05	5.71527e-05	0.000114305	0.000742985	0.000742985	0.000457221	0.00102875	0.000571527	0.00160027	0.000514374	0.000971595	0.00154312	0.000514374	0.00114305	0.000457221	0.000171458
Otu00301	Bacteria;Actinobacteria;Actinobacteria;Bifidobacteriales;Bifidobacteriaceae;Bifidobacterium	Actinobacteria	Actinobacteria	Bifidobacteriales	Bifidobacteriaceae	Bifidobacterium	0.000507116	M06047_81_000000000CBLT5_1_1101_11508_3246	0.00178126	0.000114305	0.000600103	9.52544e-06	6.66781e-05	0	5.71527e-05	0	0.00994456	0.000628679	5.71527e-05	0	0.000171458	0.000171458	0.000285763	5.71527e-05	0	0	0.0020575	0.000114305	5.71527e-05	0.000171458	0	5.71527e-05	0	0	0	0	0	0.000400069	0	0	0	0	0	0	0	0
Otu00302	Bacteria;Bacteroidetes;Bacteroidia;Bacteroidales;Bacteroidaceae;Bacteroides	Bacteroidetes	Bacteroidia	Bacteroidales	Bacteroidaceae	Bacteroides	0.00050258	C70117_71_000000000C45C2_1_2110_18995_21202	0.00020956	0.000742985	0.000571527	0.00306719	0.000419119	0.000200034	0	0.000342916	5.71527e-05	5.71527e-05	0.000457221	0.000342916	5.71527e-05	0.000685832	0.000114305	0.000171458	0.00102875	0.00240041	0.000171458	0.000457221	0.000285763	0.00137166	0.00674401	0.00754415	0.000628679	0.00308624	0.000171458	0.000228611	0.000400069	0.000628679	0.000114305	0.000800137	0.000285763	0.000285763	0.000457221	0.000285763	5.71527e-05	0
Otu00303	Bacteria;Proteobacteria;Alphaproteobacteria;Caulobacterales;Hyphomonadaceae;unclassified_Hyphomonadaceae	Proteobacteria	Alphaproteobacteria	Caulobacterales	Hyphomonadaceae	unclassified_Hyphomonadaceae	0.000500766	M06047_81_000000000CBLT5_1_2110_9474_8227	9.52544e-06	0.000190509	1.42882e-05	0	9.52544e-06	0	0	0	0	0	5.71527e-05	0	0	0	0	0.00114305	0	0	0	5.71527e-05	0	0	0	0	0	0	0	0	0	5.71527e-05	0	0	0	0	0	0	0	0
Otu00304	Bacteria;Firmicutes;Clostridia;Clostridiales;Lachnospiraceae;unclassified_Lachnospiraceae	Firmicutes	Clostridia	Clostridiales	Lachnospiraceae	unclassified_Lachnospiraceae	0.000499859	M03062_107_000000000CBKND_1_1112_8750_21393	0.000923968	0.000361967	8.5729e-05	0.000571527	0.0015717	0.000814425	0.000571527	0.0032577	0.000342916	0.000171458	0.000742985	0.000457221	0.000285763	0.000514374	0.000114305	0.000571527	0.000342916	0.000342916	5.71527e-05	0.000171458	0.000114305	0	5.71527e-05	0.000285763	0	0.000171458	0.00222895	0.000685832	0.000114305	0.000171458	0.00114305	0.000114305	0.00691547	0.000971595	5.71527e-05	0.00177173	0.00125736	0.000171458
Otu00305	Bacteria;Firmicutes;Clostridia;Clostridiales;Lachnospiraceae;unclassified_Lachnospiraceae	Firmicutes	Clostridia	Clostridiales	Lachnospiraceae	unclassified_Lachnospiraceae	0.000499859	C70117_71_000000000C45C2_1_1104_4938_8034	0.00117163	0.00031434	0.00015717	0.000476272	0.00075251	0.000785849	0.00274333	0.00251472	0.000342916	0.000514374	0.000628679	0.000285763	0.000685832	0.000171458	5.71527e-05	0.000800137	0	0.000171458	0.000457221	5.71527e-05	5.71527e-05	5.71527e-05	0.000285763	0.000342916	0.000228611	5.71527e-05	0.00102875	0.000914442	0.000114305	0.000628679	0.000742985	0.000114305	0.00142882	0.00148597	0	0.000800137	0.00177173	0.000571527
Otu00306	Bacteria;Firmicutes;Clostridia;Clostridiales;Lachnospiraceae;unclassified_Lachnospiraceae	Firmicutes	Clostridia	Clostridiales	Lachnospiraceae	unclassified_Lachnospiraceae	0.000497137	M06047_81_000000000CBLT5_1_2105_27086_13362	0.00054295	0.000190509	8.5729e-05	0.000409594	0.001124	0.00240041	0.000457221	0.000457221	0.000400069	0.000171458	0.000971595	0.000800137	0.000285763	0.000514374	0	0.000171458	0.000171458	0	5.71527e-05	0.000114305	0.000114305	5.71527e-05	0.000171458	0.000171458	0.000285763	0.000228611	0.0010859	0.000514374	0.000228611	0.000114305	0.00125736	0.000171458	0.00211465	0.00285763	0.000228611	0.00142882	0.00731554	0.000628679
Otu00307	Bacteria;Actinobacteria;Actinobacteria;Bifidobacteriales;Bifidobacteriaceae;Bifidobacterium	Actinobacteria	Actinobacteria	Bifidobacteriales	Bifidobacteriaceae	Bifidobacterium	0.00049623	C70117_71_000000000C45C2_1_2110_18952_15898	0.000285763	0.000771561	0.00450077	0.000809663	0.000152407	7.14408e-05	0	0.000114305	0	0	0.000685832	0.000914442	5.71527e-05	0.000114305	0.000171458	5.71527e-05	5.71527e-05	0.00417214	0.00943019	0.00817283	0.000171458	0.000228611	5.71527e-05	0	0.000171458	0.00417214	0	0.000457221	0.000285763	0.000114305	0	0.000514374	0	0	0.000228611	0	0	5.71527e-05
Otu00308	Bacteria;Bacteroidetes;Bacteroidia;Bacteroidales;Porphyromonadaceae;unclassified_Porphyromonadaceae	Bacteroidetes	Bacteroidia	Bacteroidales	Porphyromonadaceae	unclassified_Porphyromonadaceae	0.000482622	M06047_81_000000000CBLT5_1_2111_15705_17311	0.000485798	0.00130499	0.000928731	0.000419119	0.000723934	0.000142882	0.000571527	0.000628679	0.00102875	0.000457221	0.000228611	0	0.000342916	0.00171458	0.00171458	0.000800137	0.00200034	0.00125736	0.000285763	0.00194319	0.000171458	0.00131451	0	0	0	0.0020575	0.000457221	0	5.71527e-05	0.000457221	0.0010859	0.00274333	0	0	0.000571527	0	0	0
Otu00309	Bacteria;Proteobacteria;Alphaproteobacteria;Rhodobacterales;Rhodobacteraceae;unclassified_Rhodobacteraceae	Proteobacteria	Alphaproteobacteria	Rhodobacterales	Rhodobacteraceae	unclassified_Rhodobacteraceae	0.000480808	M06047_81_000000000CBLT5_1_1111_6074_13912	0.000228611	0.000123831	0	2.85763e-05	0.000219085	0	0	0	0	0.00137166	0	0	0	0.000742985	0	0	0	0	0	0	0	0	0.000114305	5.71527e-05	0	0	0	0	0.00131451	0	0	0	0	0	0	0	0	0
Otu00310	Bacteria;Firmicutes;Clostridia;Clostridiales;Ruminococcaceae;unclassified_Ruminococcaceae	Firmicutes	Clostridia	Clostridiales	Ruminococcaceae	unclassified_Ruminococcaceae	0.000478086	M01394_160_000000000C9RJW_1_1113_25609_18222	0.000771561	0.000219085	4.28645e-05	0.000409594	0.000666781	0.00175744	0.000114305	0.00165743	0.000457221	0.000228611	0.00102875	0.00114305	0.000457221	0.000342916	0	0.000400069	5.71527e-05	5.71527e-05	0	5.71527e-05	0.000114305	0	0.000342916	0.000571527	5.71527e-05	0.000514374	0.000742985	0.000228611	5.71527e-05	0.000285763	0.0010859	0.000114305	0.00131451	0.00114305	0.000114305	0.00148597	0.00508659	0.000342916
Otu00311	Bacteria;Firmicutes;Clostridia;Clostridiales;Ruminococcaceae;unclassified_Ruminococcaceae	Firmicutes	Clostridia	Clostridiales	Ruminococcaceae	unclassified_Ruminococcaceae	0.000478086	M06047_81_000000000CBLT5_1_2119_23631_4309	0.000504848	0.00054295	0.00031434	0.000419119	0.000295289	0.000600103	0.000742985	0.000628679	0.000514374	0.000171458	0.000628679	0.000342916	0.000971595	0.000685832	0.000228611	0.000628679	0.000400069	0.000342916	0.000285763	0.000285763	0.000342916	0.000342916	0.000114305	0.000285763	0.000685832	0.000342916	0.000171458	0.000914442	0.000342916	0.000571527	0.000114305	0.000400069	0.000114305	0.000228611	0.000514374	0.000571527	0.000285763	0.00102875
Otu00312	Bacteria;Firmicutes;Clostridia;Clostridiales;Lachnospiraceae;unclassified_Lachnospiraceae	Firmicutes	Clostridia	Clostridiales	Lachnospiraceae	unclassified_Lachnospiraceae	0.000477179	M06047_81_000000000CBLT5_1_1111_23749_12760	0.000457221	0.000514374	0.000614391	0.000514374	0.000304814	0.000428645	0.000457221	0.000114305	0.000171458	0.000685832	0.000628679	0.000685832	0.000285763	0.000685832	5.71527e-05	0.000742985	0.000914442	0.000400069	0.000628679	0.000914442	5.71527e-05	0.00085729	0.000685832	0.000285763	0.000285763	0.000914442	0.000228611	0.000685832	0.000400069	0.000514374	0.000342916	0.000400069	0	0.000171458	0.000342916	0.000171458	0.000457221	0.000742985
Otu00313	Bacteria;Firmicutes;Clostridia;Clostridiales;Lachnospiraceae;unclassified_Lachnospiraceae	Firmicutes	Clostridia	Clostridiales	Lachnospiraceae	unclassified_Lachnospiraceae	0.000477179	C70117_71_000000000C45C2_1_2106_13142_11068	0.000361967	2.85763e-05	1.42882e-05	0.000638205	0.00136214	0.00135738	0.000457221	0.000285763	0.000228611	0.000114305	0.000685832	0.000400069	5.71527e-05	0	5.71527e-05	5.71527e-05	0	0	0	5.71527e-05	0	0	0.000114305	5.71527e-05	5.71527e-05	0.000457221	0.00240041	0.000742985	0	5.71527e-05	0.00342916	0	0.00285763	0.00182888	0	0.00125736	0.00405784	0.000114305
Otu00314	Bacteria;Firmicutes;Clostridia;Clostridiales;Lachnospiraceae;unclassified_Lachnospiraceae	Firmicutes	Clostridia	Clostridiales	Lachnospiraceae	unclassified_Lachnospiraceae	0.000474458	M06047_81_000000000CBLT5_1_1102_12547_8405	0.000352441	0.000238136	0.000200034	0.000733459	0.000638205	0.00070012	0.000342916	0.000571527	0.000228611	0.000285763	0.000342916	0.000342916	0.000285763	0.000571527	0.000114305	0.000114305	0.000171458	0.000171458	0.000285763	0.000171458	0	0.000342916	0.000285763	0.000228611	0.000971595	0.000457221	0.000400069	0.0020575	0.000685832	0.000114305	0.000571527	0.000114305	0.00120021	0.00114305	0.000228611	0.00114305	0.00114305	0.000285763
Otu00315	Bacteria;Firmicutes;Clostridia;Clostridiales;Lachnospiraceae;Ruminococcus2	Firmicutes	Clostridia	Clostridiales	Lachnospiraceae	Ruminococcus2	0.000470829	C70117_71_000000000C45C2_1_2104_17385_17845	0.000590577	0.000523899	0.000757273	4.76272e-05	0.00122878	0.000285763	5.71527e-05	0	0.000628679	0.0010859	0.00125736	0.000514374	0.000228611	5.71527e-05	0.000171458	0.000114305	0.00240041	0.000171458	0	0.000228611	0.000114305	0.00268617	0.000114305	0	0	5.71527e-05	5.71527e-05	5.71527e-05	0.00308624	0.000171458	0.000171458	0.00302909	5.71527e-05	0.00085729	5.71527e-05	0.00085729	0.000171458	5.71527e-05
Otu00316	Bacteria;Firmicutes;Clostridia;Clostridiales;unclassified_Clostridiales;	Firmicutes	Clostridia	Clostridiales	unclassified_Clostridiales		0.000468107	M01394_160_000000000C9RJW_1_2101_23737_17734	0.000361967	0.000514374	0.000100017	0.000342916	0.000723934	0.000843002	0.000342916	0.000285763	0.000114305	0.000514374	0.000342916	0.000571527	0.000400069	0.000971595	0.000457221	0.000685832	0.000114305	0.000457221	0.000171458	5.71527e-05	0.000114305	5.71527e-05	5.71527e-05	5.71527e-05	0.000400069	0.000914442	0.000342916	0.000285763	0.000457221	0.000342916	0.000971595	0.000285763	0.00085729	0.00142882	0.000400069	0.00085729	0.00160027	0.000514374
Otu00317	Bacteria;Firmicutes;Clostridia;Clostridiales;Lachnospiraceae;unclassified_Lachnospiraceae	Firmicutes	Clostridia	Clostridiales	Lachnospiraceae	unclassified_Lachnospiraceae	0.000463572	M03062_118_000000000CKCW4_1_1119_8340_17594	8.5729e-05	0.000228611	0.000142882	0.00118115	0.000800137	0.000614391	0	0	0.000171458	0.000342916	0	0	0.000914442	0.000171458	0.000114305	0.000114305	0	5.71527e-05	0.000514374	5.71527e-05	0	0	0.000742985	0.000342916	0.000285763	5.71527e-05	0.000342916	0.0053152	0.000114305	0.000514374	0.000285763	5.71527e-05	0.00257187	0.00125736	5.71527e-05	0.00120021	0.000742985	0.000457221
Otu00318	Bacteria;Bacteroidetes;Bacteroidia;Bacteroidales;Bacteroidaceae;Bacteroides	Bacteroidetes	Bacteroidia	Bacteroidales	Bacteroidaceae	Bacteroides	0.000463572	M03062_107_000000000CBKND_1_1105_25255_13868	0.000152407	0.0011621	0.00215751	0.000504848	0.000171458	0.00172887	0	0.000228611	0.000285763	0.000342916	0	5.71527e-05	5.71527e-05	0.00291479	0.00234326	0.000800137	0.000228611	0.000628679	0.000228611	0.00537235	0.000171458	0.00285763	0	0	0.00125736	0.00171458	5.71527e-05	0	0.000114305	0.000171458	0	0.000628679	0.000114305	0	0.00451506	0	5.71527e-05	0.00234326
Otu00319	Bacteria;Firmicutes;Clostridia;Clostridiales;Lachnospiraceae;unclassified_Lachnospiraceae	Firmicutes	Clostridia	Clostridiales	Lachnospiraceae	unclassified_Lachnospiraceae	0.00046085	M06047_81_000000000CBLT5_1_1109_6196_15510	9.52544e-05	0	0	2.85763e-05	2.85763e-05	0.000514374	0	0.000457221	0	0	5.71527e-05	5.71527e-05	0	0	0	0	0	0	0	0	0	0	0	0.000114305	0	0	0	5.71527e-05	0	0	5.71527e-05	0	5.71527e-05	5.71527e-05	0	5.71527e-05	0.00194319	5.71527e-05
Otu00320	Bacteria;Firmicutes;Clostridia;Clostridiales;Ruminococcaceae;Clostridium IV	Firmicutes	Clostridia	Clostridiales	Ruminococcaceae	Clostridium IV	0.000459943	M06047_81_000000000CBLT5_1_1111_6228_7752	0.000361967	0.000219085	0.000300051	0.000266712	0.000485798	0.00101446	0.000228611	0.000685832	0.000114305	0.000114305	0.000685832	0.000342916	0.000285763	0.000114305	0.000114305	0.000457221	5.71527e-05	0.000285763	0.000114305	0.000171458	5.71527e-05	0.00085729	0.000171458	0.000285763	0	5.71527e-05	0.000971595	0.000114305	0.000171458	0.000171458	0.000571527	5.71527e-05	0.00165743	0.000285763	0.000285763	0.00085729	0.00268617	0.000228611
Otu00321	Bacteria;Firmicutes;Clostridia;Clostridiales;Lachnospiraceae;unclassified_Lachnospiraceae	Firmicutes	Clostridia	Clostridiales	Lachnospiraceae	unclassified_Lachnospiraceae	0.000459036	M06047_81_000000000CBLT5_1_2113_22862_7856	0.000466747	0.00158122	0.00105732	4.76272e-05	0.00118115	0.000300051	0.000171458	0.000400069	0.00114305	0.000285763	0.000171458	0.000628679	0.000914442	0.0010859	0.00102875	0.00114305	0.00280048	0.00251472	0.000914442	0.00137166	5.71527e-05	0.00188604	0	0	0	5.71527e-05	0.000171458	5.71527e-05	0.00342916	0.000971595	0.000342916	0.00222895	0	0.000114305	0.00102875	0.000114305	5.71527e-05	0
Otu00322	Bacteria;Firmicutes;Clostridia;Clostridiales;unclassified_Clostridiales;	Firmicutes	Clostridia	Clostridiales	unclassified_Clostridiales		0.000459036	M06047_81_000000000CBLT5_1_2110_19523_18885	0.000609628	0.000581052	8.5729e-05	0.000228611	0.000247662	0.000357204	0.000457221	0.000285763	0.000742985	0.000742985	0.000685832	0.000742985	0.000628679	0.00125736	0.000514374	0.000571527	0.000400069	0.000114305	5.71527e-05	0	0.000228611	5.71527e-05	0	5.71527e-05	0.000342916	0.000514374	0.000114305	0.000342916	5.71527e-05	0.000228611	0.000171458	0.000114305	0.000514374	0.000400069	0.000742985	0.000285763	0.000228611	0.000171458
Otu00323	Bacteria;Firmicutes;Clostridia;Clostridiales;Ruminococcaceae;unclassified_Ruminococcaceae	Firmicutes	Clostridia	Clostridiales	Ruminococcaceae	unclassified_Ruminococcaceae	0.000448149	C70117_71_000000000C45C2_1_2102_21727_11251	0.000323865	0.00143834	0.000414357	0.000266712	0.000171458	0.000428645	0.000400069	0.000114305	0.000571527	0.000342916	0.000342916	0.000171458	0.000114305	0.00451506	0.00171458	0.000685832	0.00114305	0.000457221	0.000457221	0.000114305	5.71527e-05	0.00102875	0.000228611	0.000171458	0.000114305	0.000400069	0.000514374	0.000171458	0.000114305	5.71527e-05	0.000342916	0	0.000114305	0.000400069	0.00102875	0.000228611	0.000228611	0.000228611
Otu00324	Bacteria;Firmicutes;Clostridia;Clostridiales;Ruminococcaceae;unclassified_Ruminococcaceae	Firmicutes	Clostridia	Clostridiales	Ruminococcaceae	unclassified_Ruminococcaceae	0.000447242	M06047_81_000000000CBLT5_1_2110_14983_9679	0.000276238	0.000200034	7.14408e-05	0.000409594	0.00064773	0.00191461	0.000571527	0.000171458	0.000457221	0	0.000342916	0.000114305	0.000685832	0.000171458	0	0.000285763	5.71527e-05	0	0.000171458	0.000114305	0	0	0	0	0.000342916	5.71527e-05	0.00085729	0.00120021	0	0.000342916	5.71527e-05	5.71527e-05	0.00137166	0.0020575	5.71527e-05	0.000914442	0.0042293	0.00245756
Otu00325	Bacteria;unclassified_Bacteria;;;;	unclassified_Bacteria					0.000445428	M06047_81_000000000CBLT5_1_1104_13390_7197	0.000381018	0.000114305	0.000100017	0.000295289	0.000523899	0.000400069	0.000114305	0	5.71527e-05	0.000114305	0.000628679	0.00137166	0.000514374	5.71527e-05	0	5.71527e-05	0	5.71527e-05	0.000342916	5.71527e-05	0	0	0	5.71527e-05	5.71527e-05	0	0	0.00165743	0	0.00285763	0	0	5.71527e-05	0.000228611	0.000342916	0.000171458	0.000971595	0.000114305
Otu00326	Bacteria;Firmicutes;Clostridia;Clostridiales;Ruminococcaceae;unclassified_Ruminococcaceae	Firmicutes	Clostridia	Clostridiales	Ruminococcaceae	unclassified_Ruminococcaceae	0.00043817	C70117_71_000000000C45C2_1_1112_17349_15861	0.000266712	0.000238136	0.000257187	0.000495323	0.00054295	0.000342916	0.000171458	0.000285763	0.000457221	0.000171458	0.000285763	0.000228611	0.000228611	0.000228611	0.000114305	0.000114305	0.000400069	0.000342916	0.000514374	0.000228611	0	0.000285763	0.000685832	0.000228611	0.000171458	0.000571527	0.00114305	0.000171458	0.000342916	0.000342916	0.00114305	0.000400069	0.000971595	5.71527e-05	0.00114305	0.000114305	5.71527e-05	5.71527e-05
Otu00327	Bacteria;Firmicutes;Clostridia;Clostridiales;Lachnospiraceae;unclassified_Lachnospiraceae	Firmicutes	Clostridia	Clostridiales	Lachnospiraceae	unclassified_Lachnospiraceae	0.000434542	M06047_81_000000000CBLT5_1_1103_9045_18563	3.81018e-05	0.00085729	0.00282906	9.52544e-06	0.00150502	8.5729e-05	5.71527e-05	0.000114305	5.71527e-05	0	0	0	5.71527e-05	5.71527e-05	0.000285763	0.000171458	0.00114305	0.00342916	0.000514374	0.0053152	0.000171458	0.0053152	0	5.71527e-05	0	0	0	0	0.00291479	0	0	0.00611533	0	0	0.000342916	0	0	0
Otu00328	Bacteria;Actinobacteria;Actinobacteria;Coriobacteriales;Coriobacteriaceae;unclassified_Coriobacteriaceae	Actinobacteria	Actinobacteria	Coriobacteriales	Coriobacteriaceae	unclassified_Coriobacteriaceae	0.000429099	C70117_71_000000000C45C2_1_2109_24394_6681	0.000133356	0.000190509	0.000171458	9.52544e-05	0.00020956	1.42882e-05	0	0.000342916	5.71527e-05	0.000114305	0.000171458	0.000114305	0.000571527	5.71527e-05	5.71527e-05	0.000457221	0	0	0.000228611	0.000285763	5.71527e-05	0.000114305	0	0.000228611	5.71527e-05	0.000171458	0	0.000114305	0	0.00125736	0	0	0	0	5.71527e-05	0	0	0
Otu00329	Bacteria;Firmicutes;Clostridia;Clostridiales;unclassified_Clostridiales;	Firmicutes	Clostridia	Clostridiales	unclassified_Clostridiales		0.000427284	M06047_81_000000000CBLT5_1_1118_23399_9921	5.71527e-05	0.000123831	2.85763e-05	4.76272e-05	0.000180983	7.14408e-05	0.000171458	0	5.71527e-05	0	0.000114305	0	0.000285763	0.000171458	0	0	0.000114305	0.000171458	0.000114305	0	0	0	0	0.000114305	0.000171458	0	0	0	0	0.00102875	0	0	5.71527e-05	0	0.000171458	5.71527e-05	0	5.71527e-05
Otu00330	Bacteria;Firmicutes;Clostridia;Clostridiales;Lachnospiraceae;Clostridium XlVa	Firmicutes	Clostridia	Clostridiales	Lachnospiraceae	Clostridium XlVa	0.000419119	M01394_160_000000000C9RJW_1_1109_22351_8907	0	0	0	0.000762035	0.00106685	0.000885866	0	0	0	0	0	0	0	0	0	0	0	0	0	0	0	0	0	0	0.000171458	0	0.0021718	0.00222895	0	0	0.00200034	0	0.00354346	0.00085729	0	0.00085729	0.00268617	0
Otu00331	Bacteria;Firmicutes;Clostridia;Clostridiales;Lachnospiraceae;unclassified_Lachnospiraceae	Firmicutes	Clostridia	Clostridiales	Lachnospiraceae	unclassified_Lachnospiraceae	0.000415491	M06047_81_000000000CBLT5_1_1102_7217_10198	0.000228611	0.000114305	4.28645e-05	0.00109543	0.00033339	0.00031434	5.71527e-05	0.000457221	0	0	0.000342916	0.000514374	0.000114305	0.000114305	0	0.000342916	5.71527e-05	5.71527e-05	0	0	0.000171458	0	0.000171458	0.000285763	0.000114305	0	0.000285763	0.00571527	5.71527e-05	0.000228611	0.000171458	0	0.000457221	0.0010859	5.71527e-05	5.71527e-05	0.00085729	0.000285763
Otu00332	Bacteria;Firmicutes;Clostridia;Clostridiales;Ruminococcaceae;unclassified_Ruminococcaceae	Firmicutes	Clostridia	Clostridiales	Ruminococcaceae	unclassified_Ruminococcaceae	0.000414584	M06047_81_000000000CBLT5_1_1115_20032_3330	0.000447696	0.00145739	0.000371492	0.00064773	0.00064773	0.00015717	0.000114305	0.000171458	0.00125736	0.000514374	0.000171458	0.000457221	0.000342916	0.00102875	0.00268617	0.000800137	0.000914442	0.00297194	0	0.000400069	0.000114305	0.000971595	0	0.000114305	0.000971595	0.00222895	0.000457221	0.000114305	0.000342916	0.00137166	0.000685832	0.00102875	5.71527e-05	0.000400069	0.000514374	0	0	0.000114305
Otu00333	Bacteria;Bacteroidetes;Bacteroidia;Bacteroidales;Porphyromonadaceae;unclassified_Porphyromonadaceae	Bacteroidetes	Bacteroidia	Bacteroidales	Porphyromonadaceae	unclassified_Porphyromonadaceae	0.000413676	M06047_81_000000000CBLT5_1_2112_17751_22264	0.000581052	0.000190509	0.000200034	0.000219085	0.000123831	0.000228611	0.000114305	0.000342916	0.000800137	0.00085729	0.000457221	0.000914442	0.000457221	0.000228611	0.000171458	5.71527e-05	0.000171458	5.71527e-05	0.000685832	0	5.71527e-05	5.71527e-05	0	0	0.00085729	0.000114305	0.000114305	0.000228611	0	0	5.71527e-05	5.71527e-05	0.000285763	0.000342916	0.000114305	0	0.000571527	0.000228611
Otu00334	Bacteria;Firmicutes;Clostridia;Clostridiales;Lachnospiraceae;unclassified_Lachnospiraceae	Firmicutes	Clostridia	Clostridiales	Lachnospiraceae	unclassified_Lachnospiraceae	0.000413676	M03062_107_000000000CBKND_1_1105_10735_14706	6.66781e-05	0.00243851	0.00114305	9.52544e-06	2.85763e-05	2.85763e-05	5.71527e-05	0.000114305	0	5.71527e-05	0	0.000171458	5.71527e-05	0.000228611	0.000971595	0.000342916	0.00903012	0.00400069	0.000171458	0.0031434	0.000114305	0.00114305	5.71527e-05	0	0	0	0	0	5.71527e-05	0	0	0.000114305	0	0	0.000114305	0	0	0
Otu00335	Bacteria;Actinobacteria;Actinobacteria;Coriobacteriales;Coriobacteriaceae;unclassified_Coriobacteriaceae	Actinobacteria	Actinobacteria	Coriobacteriales	Coriobacteriaceae	unclassified_Coriobacteriaceae	0.000412769	M06047_81_000000000CBLT5_1_2114_12653_10240	0.000180983	0.00020956	0.000771561	0.000552476	9.52544e-05	0.000300051	0.000114305	0.000171458	0.000171458	0.000285763	0.000114305	0.000228611	0.000228611	0.000114305	0.000285763	0.000114305	0.000457221	5.71527e-05	0.000114305	0.00165743	5.71527e-05	0.00125736	0.000742985	0.00102875	0.000457221	0.000400069	5.71527e-05	0.000628679	0.000114305	0.000228611	0.000114305	5.71527e-05	5.71527e-05	0	0.000285763	0.000114305	0	0.000800137
Otu00336	Bacteria;unclassified_Bacteria;;;;	unclassified_Bacteria					0.00040914	M06047_81_000000000CBLT5_1_1102_13784_16112	0.000257187	0.00180031	0.0010859	9.52544e-06	0.000704883	1.42882e-05	0	5.71527e-05	0.00125736	0.000114305	0.000114305	0	0.000114305	0.000228611	0.00451506	0.0042293	5.71527e-05	0.00165743	0.00360062	0.000285763	0	0.000457221	0	0	0	0	0	5.71527e-05	5.71527e-05	5.71527e-05	0.000114305	0.00400069	0	0	0	0	0	5.71527e-05
Otu00337	Bacteria;Firmicutes;Clostridia;Clostridiales;Ruminococcaceae;unclassified_Ruminococcaceae	Firmicutes	Clostridia	Clostridiales	Ruminococcaceae	unclassified_Ruminococcaceae	0.000408233	C70117_71_000000000C45C2_1_1115_11413_20097	0.000200034	0.000180983	8.5729e-05	0.000514374	0.000476272	0.000628679	5.71527e-05	0.000342916	0.000171458	0.000171458	0.000285763	0.000171458	0.000285763	0.000228611	5.71527e-05	0.000228611	0.000114305	0.000171458	0	0.000114305	5.71527e-05	0.000171458	0	0.000228611	0.000171458	0.000628679	0.00085729	0.00120021	5.71527e-05	0.000171458	0.000571527	0.000342916	0.000457221	0.00125736	5.71527e-05	0.00125736	0.000971595	0.000228611
Otu00338	Bacteria;Firmicutes;Clostridia;Clostridiales;Lachnospiraceae;Clostridium XlVa	Firmicutes	Clostridia	Clostridiales	Lachnospiraceae	Clostridium XlVa	0.000407326	M03062_107_000000000CBKND_1_2113_14062_13412	3.81018e-05	0.000885866	0.00460079	1.90509e-05	7.62035e-05	7.14408e-05	0	0.000171458	5.71527e-05	0	0	0	5.71527e-05	0.000171458	0	5.71527e-05	0.00497228	5.71527e-05	0.000742985	0.00697262	0.00085729	0.00983026	0	0	5.71527e-05	0	0	5.71527e-05	0	0.000171458	5.71527e-05	0.000114305	5.71527e-05	5.71527e-05	0.000171458	5.71527e-05	5.71527e-05	0
Otu00339	Bacteria;Firmicutes;Clostridia;Clostridiales;Ruminococcaceae;unclassified_Ruminococcaceae	Firmicutes	Clostridia	Clostridiales	Ruminococcaceae	unclassified_Ruminococcaceae	0.000406419	M06047_81_000000000CBLT5_1_1104_18860_19619	0.000133356	0.00119068	0.00038578	0.00133356	0.000238136	0.000485798	0.000171458	0.000114305	0.000171458	0	0.000114305	0.000228611	0.000285763	0.000457221	0.00371492	0.00120021	0.00125736	0.000228611	0	0.000685832	0.000171458	0.000685832	0.00200034	0.000400069	0.00228611	0.000285763	0.000228611	0.00280048	0.000228611	0.000400069	0	0.000228611	0	0.000571527	0.00154312	0.000228611	0	0.000171458
Otu00340	Bacteria;Bacteroidetes;Bacteroidia;Bacteroidales;Porphyromonadaceae;Odoribacter	Bacteroidetes	Bacteroidia	Bacteroidales	Porphyromonadaceae	Odoribacter	0.000404605	C70117_71_000000000C45C2_1_1115_5655_16306	0.000228611	0.000161933	0.000100017	0.0010097	0.000533425	0.00038578	0.000171458	0.000285763	0.000171458	0.000228611	5.71527e-05	0.000457221	0.000171458	0.000285763	5.71527e-05	0.000114305	0.000285763	5.71527e-05	0.000342916	0	5.71527e-05	0	0.00142882	0.00125736	0.000400069	0.000514374	0.000285763	0.0021718	5.71527e-05	0.000514374	0.000171458	0.000114305	0.000228611	0.00211465	0.000114305	0.000342916	0.000228611	0.00085729
Otu00341	Bacteria;Firmicutes;Clostridia;Clostridiales;Ruminococcaceae;Oscillibacter	Firmicutes	Clostridia	Clostridiales	Ruminococcaceae	Oscillibacter	0.000401883	M06047_81_000000000CBLT5_1_1103_19642_17320	0.000657256	0.000238136	8.5729e-05	0.000390543	0.000476272	0.000600103	0.000514374	0.000914442	0.000285763	0.000228611	0.00177173	0.000228611	0.000457221	0.000342916	0.000114305	0.000114305	5.71527e-05	0.000342916	5.71527e-05	0.000114305	5.71527e-05	0.000114305	0.000400069	0.000342916	0	0.000514374	0.00085729	0.000228611	0.000114305	0.0010859	0.000514374	0.000228611	0.000228611	0.000685832	0.000342916	0.00120021	0.000457221	0.000400069
Otu00342	Bacteria;Firmicutes;Clostridia;Clostridiales;Lachnospiraceae;unclassified_Lachnospiraceae	Firmicutes	Clostridia	Clostridiales	Lachnospiraceae	unclassified_Lachnospiraceae	0.000400976	C70117_71_000000000C45C2_1_1109_25023_16815	0.000447696	0.00020956	1.42882e-05	0.000495323	0.0010859	0.00105732	0.000342916	0.00114305	5.71527e-05	5.71527e-05	0.00085729	0.000228611	0.000400069	0.000228611	0.000114305	0.000400069	0.000114305	0	0	5.71527e-05	0	0	0.000228611	0	0	0.000628679	0.00160027	0.000514374	0.000114305	0.000114305	0.00245756	0.000114305	0.00245756	0.00125736	0.000171458	0.00188604	0.0020575	0.000114305
Otu00343	Bacteria;Bacteroidetes;Bacteroidia;Bacteroidales;unclassified_Bacteroidales;	Bacteroidetes	Bacteroidia	Bacteroidales	unclassified_Bacteroidales		0.000400069	C70117_71_000000000C45C2_1_2102_8385_8414	0.000257187	0.000304814	0.00151455	0.000762035	0.000238136	0.000285763	5.71527e-05	0.000285763	0.000114305	0	0.000228611	0.00085729	0.000171458	0.000628679	0	0.000285763	0.000342916	0.000400069	5.71527e-05	0.00177173	0.000171458	0.00405784	0.000114305	5.71527e-05	0.000228611	0.00102875	5.71527e-05	0.00308624	0.000285763	0.000628679	0.000114305	0.000342916	5.71527e-05	0	5.71527e-05	0.000285763	0.000457221	0.000342916
Otu00344	Bacteria;Firmicutes;Clostridia;Clostridiales;Lachnospiraceae;unclassified_Lachnospiraceae	Firmicutes	Clostridia	Clostridiales	Lachnospiraceae	unclassified_Lachnospiraceae	0.000398254	M06047_81_000000000CBLT5_1_2106_16772_6781	3.81018e-05	0	4.28645e-05	0.00064773	0.000371492	0.0020575	0	0.000228611	0	0	0	0	0	0	0	0	0	0	0	0	5.71527e-05	0.000114305	0	0	5.71527e-05	0	0.00371492	0.000114305	0	0	0.00182888	0	0.000114305	0.000285763	0.000171458	0.00462937	0.000114305	0.00331485
Otu00345	Bacteria;Firmicutes;Clostridia;Clostridiales;unclassified_Clostridiales;	Firmicutes	Clostridia	Clostridiales	unclassified_Clostridiales		0.000394625	M06047_81_000000000CBLT5_1_1107_12055_2789	0.000666781	0.000533425	0.000900154	4.76272e-05	0.000200034	0.000342916	0.000685832	0.000171458	0.000457221	0.00142882	0.000514374	0.000742985	0.0021718	0.000285763	0.000114305	0.000342916	0.000171458	0.000114305	0.00331485	0.000114305	0.000114305	5.71527e-05	0	5.71527e-05	5.71527e-05	0	0.000171458	0	0.000171458	5.71527e-05	5.71527e-05	5.71527e-05	0.000457221	0.000400069	0.000171458	5.71527e-05	0.0010859	5.71527e-05
Otu00346	Bacteria;Bacteroidetes;Bacteroidia;Bacteroidales;Rikenellaceae;Alistipes	Bacteroidetes	Bacteroidia	Bacteroidales	Rikenellaceae	Alistipes	0.000393718	C70117_71_000000000C45C2_1_2102_16820_12647	0.000381018	0.000180983	0.000100017	0.000676306	0.000400069	0.000300051	0.000171458	0.000514374	0.000457221	0.000285763	0.000457221	0.000400069	5.71527e-05	0.000514374	0.000171458	0.000114305	0	0.000228611	0.000228611	5.71527e-05	0.000114305	0	0.000342916	0.00114305	0.00085729	0.00102875	0.000400069	0.000285763	0	0.000914442	0.000285763	5.71527e-05	0.000800137	0.000342916	0.000514374	0.000457221	0.000171458	5.71527e-05
Otu00347	Bacteria;Bacteroidetes;Bacteroidia;Bacteroidales;Porphyromonadaceae;Barnesiella	Bacteroidetes	Bacteroidia	Bacteroidales	Porphyromonadaceae	Barnesiella	0.000393718	M06047_81_000000000CBLT5_1_1110_2824_10331	0.000114305	0.000219085	0.000457221	0.000819188	0.00020956	0.000400069	0.000457221	0.000228611	0	0	0	0	0.000285763	0.000342916	0.000285763	0.000228611	5.71527e-05	0.000114305	0.000457221	0.000285763	0	0.0010859	0.000342916	5.71527e-05	0.000457221	0.00251472	0.000514374	0.00102875	0.000400069	0.000457221	0.000285763	0	5.71527e-05	5.71527e-05	0.000342916	0.000228611	5.71527e-05	0.000971595
Otu00348	Bacteria;Firmicutes;Clostridia;Clostridiales;Ruminococcaceae;Clostridium IV	Firmicutes	Clostridia	Clostridiales	Ruminococcaceae	Clostridium IV	0.000390997	M06047_81_000000000CBLT5_1_2104_28607_8685	0.000266712	0.000304814	7.14408e-05	0.000485798	0.000238136	0.000328628	5.71527e-05	0.000685832	0.000114305	5.71527e-05	0.000342916	0.000342916	0.000114305	0.000514374	0.000228611	0.000114305	0.000400069	0.000457221	0.000171458	0.000114305	0	0	0.000514374	0.000171458	0.00120021	0.000342916	0.000171458	0.000514374	0.000400069	0.000285763	0.000114305	0.000228611	0.000114305	0.000285763	0.000400069	0.000400069	0.000285763	0.000228611
Otu00349	Bacteria;Firmicutes;Clostridia;Clostridiales;Lachnospiraceae;unclassified_Lachnospiraceae	Firmicutes	Clostridia	Clostridiales	Lachnospiraceae	unclassified_Lachnospiraceae	0.00039009	C70117_71_000000000C45C2_1_1115_9579_15031	0.000533425	0.00188604	2.85763e-05	1.90509e-05	9.52544e-05	1.42882e-05	0	0.000514374	0.000971595	0.000114305	0.00131451	0.000285763	0.0010859	0.00360062	0.0010859	0.00285763	0.00240041	0.000285763	0	5.71527e-05	0	5.71527e-05	0	5.71527e-05	0	5.71527e-05	0	0	0.000114305	0.000285763	5.71527e-05	0.000114305	0	0	0	5.71527e-05	0	0
Otu00350	Bacteria;Firmicutes;Clostridia;Clostridiales;Lachnospiraceae;unclassified_Lachnospiraceae	Firmicutes	Clostridia	Clostridiales	Lachnospiraceae	unclassified_Lachnospiraceae	0.000389182	M06047_81_000000000CBLT5_1_2112_26760_18338	0.000266712	0.000571527	0	4.76272e-05	3.81018e-05	0.00131451	0.000114305	0	0.000228611	0	0.00085729	0.000400069	0.000171458	0.00142882	0.000228611	0.00125736	0.000342916	0	0	0	0	0	0	0	5.71527e-05	0	0.000114305	0.000114305	0	5.71527e-05	0	0	0.000114305	5.71527e-05	0	0.00520089	5.71527e-05	0
Otu00351	Bacteria;Firmicutes;Clostridia;Clostridiales;Ruminococcaceae;unclassified_Ruminococcaceae	Firmicutes	Clostridia	Clostridiales	Ruminococcaceae	unclassified_Ruminococcaceae	0.000386461	M06047_81_000000000CBLT5_1_1118_4154_15120	0.000562001	0.000123831	7.14408e-05	0.000171458	0.000381018	0.000871578	0.000400069	0.000685832	0.0010859	0.000171458	0.000457221	0.000571527	0.000171458	0.000171458	0.000114305	0.000228611	0	5.71527e-05	5.71527e-05	5.71527e-05	5.71527e-05	0.000114305	0	0	5.71527e-05	0.000114305	0.000514374	0.000342916	0	0.000171458	0.000400069	0.000400069	0.000457221	0.00085729	0.000114305	0.00102875	0.00148597	0.00085729
Otu00352	Bacteria;Firmicutes;Clostridia;Clostridiales;unclassified_Clostridiales;	Firmicutes	Clostridia	Clostridiales	unclassified_Clostridiales		0.000386461	M01394_160_000000000C9RJW_1_2117_9189_12767	0.00031434	0.00180983	7.14408e-05	4.76272e-05	0.000142882	4.28645e-05	0.000571527	0.000342916	0.000228611	0.000228611	5.71527e-05	0.000457221	5.71527e-05	0.00211465	0.000114305	0.000171458	0.007487	0.000914442	0.000228611	0	0	5.71527e-05	0	0	0	5.71527e-05	0.000114305	0.000114305	0	0.000228611	0	0.000571527	0	5.71527e-05	5.71527e-05	0	0	0.000114305
Otu00353	Bacteria;Firmicutes;Clostridia;Clostridiales;Ruminococcaceae;unclassified_Ruminococcaceae	Firmicutes	Clostridia	Clostridiales	Ruminococcaceae	unclassified_Ruminococcaceae	0.000376482	M06047_81_000000000CBLT5_1_1102_4106_17237	0.000171458	0.000238136	0.000100017	0.000123831	4.76272e-05	0.000200034	0	0.000400069	0	0	0.000400069	0.000228611	0	5.71527e-05	0.000742985	0.000400069	0	0.000228611	0.000285763	5.71527e-05	5.71527e-05	0	0	0	0	0.000342916	0.000400069	0	0	0	0.000228611	0	0	5.71527e-05	0.000514374	0.000228611	0	5.71527e-05
Otu00354	Bacteria;Firmicutes;Clostridia;Clostridiales;Lachnospiraceae;unclassified_Lachnospiraceae	Firmicutes	Clostridia	Clostridiales	Lachnospiraceae	unclassified_Lachnospiraceae	0.00037376	M06047_81_000000000CBLT5_1_2115_21057_12864	0.000466747	2.85763e-05	8.5729e-05	3.81018e-05	0	0.000714408	0	0	0.000571527	0	0.000228611	0.00200034	0	0	0	0.000171458	0	0	0.000228611	0.000114305	0	0	0	0.000171458	0	5.71527e-05	0	0	0	0	0	0	0	0	5.71527e-05	0	0	0.00280048
Otu00355	Bacteria;Firmicutes;Clostridia;Clostridiales;Lachnospiraceae;unclassified_Lachnospiraceae	Firmicutes	Clostridia	Clostridiales	Lachnospiraceae	unclassified_Lachnospiraceae	0.00037376	M06047_81_000000000CBLT5_1_2112_14766_5717	0.000400069	0.00020956	4.28645e-05	0.000238136	0.0010859	0.00102875	5.71527e-05	0.000685832	0	5.71527e-05	0.000457221	0.00114305	0.000114305	0.000342916	0.000171458	0.000285763	0.000114305	0.000228611	5.71527e-05	0	0	0.000114305	0	5.71527e-05	0	5.71527e-05	0.0010859	0.000228611	0	0.000514374	0.00222895	0.000514374	0.00257187	0.000685832	5.71527e-05	0.00165743	0.00222895	0.000171458
Otu00356	Bacteria;Proteobacteria;Alphaproteobacteria;Rhodobacterales;Rhodobacteraceae;unclassified_Rhodobacteraceae	Proteobacteria	Alphaproteobacteria	Rhodobacterales	Rhodobacteraceae	unclassified_Rhodobacteraceae	0.000370131	M06047_81_000000000CBLT5_1_1103_23818_16852	9.52544e-05	5.71527e-05	0	1.90509e-05	2.85763e-05	0	0	0	0	0.000571527	0	0	0	0.000342916	0	0	0	0	0	0	0	0	0	0.000114305	0	0	0	0	0.000171458	0	0	0	0	0	0	0	0	0
Otu00357	Bacteria;Firmicutes;Clostridia;Clostridiales;Lachnospiraceae;unclassified_Lachnospiraceae	Firmicutes	Clostridia	Clostridiales	Lachnospiraceae	unclassified_Lachnospiraceae	0.000368317	C70117_71_000000000C45C2_1_1103_15942_13079	0.000304814	0.00136214	0	3.81018e-05	0.000266712	1.42882e-05	0.000285763	0.000228611	0.000457221	0.000171458	0.000171458	0.000514374	0.00685832	0.000171458	0.000228611	0.000400069	0	0.000514374	0	0	0	0	0	0	0	0.000228611	0	0	0.000342916	0.00085729	0	0.000400069	0	0	0	5.71527e-05	0	0
Otu00358	Bacteria;Firmicutes;Erysipelotrichia;Erysipelotrichales;Erysipelotrichaceae;Allobaculum	Firmicutes	Erysipelotrichia	Erysipelotrichales	Erysipelotrichaceae	Allobaculum	0.000368317	C70117_71_000000000C45C2_1_2112_19021_3887	4.76272e-05	0.00142882	0.00337201	6.66781e-05	0	5.71527e-05	0	0.000228611	0	0	0	5.71527e-05	5.71527e-05	0	0	5.71527e-05	5.71527e-05	0.00840144	0.0053152	0.00405784	0.000285763	0.00382923	5.71527e-05	0.000114305	0.000114305	0	0	0.000114305	0	0	0	0	0	0	0.000228611	0	0	0
Otu00359	Bacteria;Firmicutes;Clostridia;Clostridiales;Ruminococcaceae;Clostridium IV	Firmicutes	Clostridia	Clostridiales	Ruminococcaceae	Clostridium IV	0.00036741	C70117_71_000000000C45C2_1_2108_27670_8639	0.000476272	9.52544e-05	2.85763e-05	0.000114305	0.00127641	0.00177173	0.000685832	0.000571527	5.71527e-05	0	0.000800137	0.000742985	5.71527e-05	0.000342916	0	0.000171458	0	0	0	5.71527e-05	0	5.71527e-05	0.000114305	0.000114305	0.000171458	0	0.000228611	5.71527e-05	0.000171458	5.71527e-05	0.000228611	0	0.00674401	0.000457221	0.000228611	0.000514374	0.00417214	0.0021718
Otu00360	Bacteria;Firmicutes;Clostridia;Clostridiales;Lachnospiraceae;unclassified_Lachnospiraceae	Firmicutes	Clostridia	Clostridiales	Lachnospiraceae	unclassified_Lachnospiraceae	0.000363781	M06047_81_000000000CBLT5_1_1118_21583_12645	0.000428645	0.000200034	7.14408e-05	0.000352441	0.000409594	0.000800137	5.71527e-05	0.00125736	0.000342916	0.000285763	0.000571527	5.71527e-05	0.00102875	0	0.000114305	5.71527e-05	0	0	0.000171458	5.71527e-05	5.71527e-05	0	0.000400069	0	0	0.000114305	0.000914442	0.000685832	0	0.000114305	0.000742985	5.71527e-05	0.000514374	0.00102875	5.71527e-05	0.000971595	0.00148597	0.000685832
Otu00361	Bacteria;Firmicutes;Clostridia;Clostridiales;Ruminococcaceae;unclassified_Ruminococcaceae	Firmicutes	Clostridia	Clostridiales	Ruminococcaceae	unclassified_Ruminococcaceae	0.000363781	C70117_71_000000000C45C2_1_2109_15101_8887	0.000171458	0.000257187	0.000142882	6.66781e-05	0.000152407	0.000128593	0.000171458	0	0.000171458	0.000171458	0.000228611	0.000285763	0.000114305	0.000114305	0.00085729	0.000228611	0	0.000228611	0.000114305	0.000400069	0	5.71527e-05	0	5.71527e-05	0.000114305	0.000171458	5.71527e-05	0	0.000171458	0.000228611	5.71527e-05	0.000114305	0.000171458	0.000171458	0.000342916	5.71527e-05	5.71527e-05	5.71527e-05
Otu00362	Bacteria;Firmicutes;Erysipelotrichia;Erysipelotrichales;Erysipelotrichaceae;Erysipelotrichaceae_incertae_sedis	Firmicutes	Erysipelotrichia	Erysipelotrichales	Erysipelotrichaceae	Erysipelotrichaceae_incertae_sedis	0.00036106	M06047_81_000000000CBLT5_1_1101_28568_13607	0	0.000361967	0.000985883	1.90509e-05	0.00240041	1.42882e-05	0	0	0	0	0	0	5.71527e-05	0	5.71527e-05	5.71527e-05	0.00085729	0.00114305	0.000228611	5.71527e-05	0.000971595	0.00268617	0	5.71527e-05	0	0	5.71527e-05	0	0.0100589	0.000285763	5.71527e-05	0.00394353	5.71527e-05	0	0	0	0	5.71527e-05
Otu00363	Bacteria;Bacteroidetes;Bacteroidia;Bacteroidales;Rikenellaceae;Alistipes	Bacteroidetes	Bacteroidia	Bacteroidales	Rikenellaceae	Alistipes	0.00036106	M06047_81_000000000CBLT5_1_2107_25822_13326	0.000238136	0.000685832	0.00070012	0.000666781	0.000476272	0.000257187	0.000228611	0.000228611	0.000342916	0.000114305	0.000114305	0.000400069	0.000228611	0.00268617	0.000171458	0.000171458	0.000457221	0.000400069	0.000800137	0.0010859	0.000171458	0.000742985	0.000571527	0.000742985	0.000285763	0.00154312	0.000457221	0.000400069	0.000800137	0	0.000342916	0.000800137	0.000742985	0.000171458	0.000457221	0.000400069	0.000171458	0
Otu00364	Bacteria;Firmicutes;Clostridia;Clostridiales;Lachnospiraceae;unclassified_Lachnospiraceae	Firmicutes	Clostridia	Clostridiales	Lachnospiraceae	unclassified_Lachnospiraceae	0.000359245	M01394_160_000000000C9RJW_1_1117_6230_19438	4.76272e-05	6.66781e-05	0	0.000914442	0.00259092	0.000114305	0	0	0	5.71527e-05	0.000114305	0.000114305	5.71527e-05	0.000114305	0	0.000114305	5.71527e-05	5.71527e-05	0	0	0	0	0	0	0.0031434	5.71527e-05	0.000114305	0.0021718	0	5.71527e-05	0.000114305	5.71527e-05	0.0149168	0.000400069	5.71527e-05	0.000171458	0.000228611	0
Otu00365	Bacteria;Firmicutes;Clostridia;unclassified_Clostridia;;	Firmicutes	Clostridia	unclassified_Clostridia			0.000356524	C70117_71_000000000C45C2_1_2103_5067_5875	0.000247662	0.000219085	5.71527e-05	0.000142882	0.00043817	0.000500086	0.000514374	0.000514374	0	0.000228611	0.000228611	0	0.000685832	0.000171458	0.000228611	0.000114305	5.71527e-05	5.71527e-05	5.71527e-05	0.000114305	0	5.71527e-05	5.71527e-05	0	0.000171458	0.000171458	0.000285763	0.000171458	5.71527e-05	0.000114305	0.000400069	0.000114305	0.000628679	0.00131451	0	0.000914442	0.000457221	0.000628679
Otu00366	Bacteria;Bacteroidetes;Bacteroidia;Bacteroidales;unclassified_Bacteroidales;	Bacteroidetes	Bacteroidia	Bacteroidales	unclassified_Bacteroidales		0.000356524	M01394_160_000000000C9RJW_1_1109_21576_7834	0.000238136	0.000285763	7.14408e-05	0.000657256	0.000628679	0.000528662	5.71527e-05	0	0	0	0.00085729	0.000514374	5.71527e-05	0.000400069	0.000114305	0.00114305	0	0	0	0.000228611	5.71527e-05	0	0.000285763	0.000571527	0.000914442	0	0.000800137	0.00137166	0.000114305	0	0.00222895	0	0.000800137	0.000628679	0.000285763	0.00120021	0.000628679	0
Otu00367	Bacteria;Firmicutes;Erysipelotrichia;Erysipelotrichales;Erysipelotrichaceae;Clostridium XVIII	Firmicutes	Erysipelotrichia	Erysipelotrichales	Erysipelotrichaceae	Clostridium XVIII	0.000355617	M06047_81_000000000CBLT5_1_2115_16874_23778	0.000428645	7.62035e-05	7.14408e-05	0.000685832	0.000152407	0.000142882	0.000228611	0.000971595	0.000285763	0.000514374	0.000285763	0.000285763	0.000285763	0.000114305	0	5.71527e-05	0	0	0.000171458	0	0	0.000114305	0.000342916	0.000400069	0.00188604	0.00085729	0.000285763	0.000342916	0	0.000228611	0.000228611	5.71527e-05	0.000285763	0.000114305	0.000228611	5.71527e-05	0.000285763	0
Otu00368	Bacteria;Firmicutes;Clostridia;Clostridiales;Lachnospiraceae;Lachnospiracea_incertae_sedis	Firmicutes	Clostridia	Clostridiales	Lachnospiraceae	Lachnospiracea_incertae_sedis	0.000355617	M06047_81_000000000CBLT5_1_1104_27994_12174	0.000161933	0.000295289	1.42882e-05	0.000504848	0.000419119	0.000185746	0.000114305	0	5.71527e-05	5.71527e-05	0.000685832	5.71527e-05	0	0.000114305	0.000114305	0.00102875	0.000114305	0.000400069	0	5.71527e-05	0	0	0	0	5.71527e-05	0.0010859	0	0.00188604	0.000228611	0.000171458	0	5.71527e-05	0.00200034	5.71527e-05	0	0.000742985	0	0
Otu00369	Bacteria;Firmicutes;Clostridia;Clostridiales;Lachnospiraceae;unclassified_Lachnospiraceae	Firmicutes	Clostridia	Clostridiales	Lachnospiraceae	unclassified_Lachnospiraceae	0.000350173	M06047_81_000000000CBLT5_1_1119_10104_21609	0.00020956	0.000219085	0.00015717	0.000638205	0.000800137	0.00070012	0.000114305	0.000457221	0	5.71527e-05	0.000228611	0.000400069	0.000228611	0.000171458	5.71527e-05	0.000285763	0.000171458	0.000400069	0.000114305	5.71527e-05	0.000228611	0.000228611	0.000571527	0.000228611	0.000228611	5.71527e-05	0.0010859	0.00165743	0.000685832	5.71527e-05	0.00142882	0.000285763	0.00171458	0.000628679	0.000171458	0.00182888	0.000514374	0.000285763
Otu00370	Bacteria;Bacteroidetes;Bacteroidia;Bacteroidales;Porphyromonadaceae;unclassified_Porphyromonadaceae	Bacteroidetes	Bacteroidia	Bacteroidales	Porphyromonadaceae	unclassified_Porphyromonadaceae	0.000347452	M06047_81_000000000CBLT5_1_1114_14938_19325	0.000200034	0.000657256	0.000214322	0.000409594	0.000457221	0.000142882	0.000171458	0.000285763	0.000114305	0.000114305	0.000342916	0.000171458	0.00102875	0.000685832	0.00085729	0.000800137	0.000228611	0.000342916	0.000342916	0	0	0.000514374	0.00102875	5.71527e-05	0.000342916	0.000342916	0.000285763	0.000400069	0.000457221	0.00160027	5.71527e-05	0.000228611	0.000114305	0.000285763	0.000171458	5.71527e-05	0.000228611	0.000114305
Otu00371	Bacteria;Actinobacteria;Actinobacteria;Coriobacteriales;Coriobacteriaceae;unclassified_Coriobacteriaceae	Actinobacteria	Actinobacteria	Coriobacteriales	Coriobacteriaceae	unclassified_Coriobacteriaceae	0.00034473	M06047_81_000000000CBLT5_1_2109_10857_7972	9.52544e-05	0.00020956	0.000614391	1.90509e-05	0	0.000171458	0	0	0	0	0.000342916	0.000228611	0.000571527	0.000114305	0.000228611	0.000228611	0.000114305	0	0.000228611	0.00102875	0	0.00120021	0	5.71527e-05	5.71527e-05	0	0	0	0	0	0	0	0	0	0.000228611	0	0	0.000457221
Otu00372	Bacteria;Firmicutes;Clostridia;Clostridiales;Ruminococcaceae;Oscillibacter	Firmicutes	Clostridia	Clostridiales	Ruminococcaceae	Oscillibacter	0.00034473	M06047_81_000000000CBLT5_1_2103_20332_18150	0.000914442	0.000352441	2.85763e-05	0.000400069	0.000514374	0.00115734	0.00188604	0.000514374	5.71527e-05	5.71527e-05	0.00142882	0.00154312	0.000971595	0.000971595	0	0.000114305	5.71527e-05	0	0.000114305	0	0	0	0.000400069	0	0	0.000457221	0.00148597	5.71527e-05	0	0.000228611	0.0010859	0	0.00125736	0.000514374	0	0.00394353	0.000228611	0.000457221
Otu00373	Bacteria;Bacteroidetes;Bacteroidia;Bacteroidales;Bacteroidaceae;Bacteroides	Bacteroidetes	Bacteroidia	Bacteroidales	Bacteroidaceae	Bacteroides	0.00034473	M03062_107_000000000CBKND_1_1112_17384_11842	0.000457221	0.00096207	0.000400069	0	0.00085729	0.000557238	0	0.00188604	0	0	0.00085729	0	0	0	0	0.000800137	0.00497228	0	0.000342916	0.00102875	0.000228611	0	0	0	0	0	0	0	0	0	0	0.00514374	0	0	0	0	0	0.00222895
Otu00374	Bacteria;Firmicutes;Clostridia;Clostridiales;Lachnospiraceae;unclassified_Lachnospiraceae	Firmicutes	Clostridia	Clostridiales	Lachnospiraceae	unclassified_Lachnospiraceae	0.000343823	M06047_81_000000000CBLT5_1_2107_16136_9320	9.52544e-05	0.000123831	2.85763e-05	0.000142882	0.000723934	0.000871578	0.000171458	0.000285763	5.71527e-05	0	0	5.71527e-05	0.000400069	5.71527e-05	0.000171458	0	0.000114305	0	0.000114305	0	0	0	5.71527e-05	5.71527e-05	5.71527e-05	5.71527e-05	0.000342916	0.000285763	0	5.71527e-05	0.000171458	0	0.000400069	0.00371492	5.71527e-05	0.000685832	0.00245756	0.000285763
Otu00375	Bacteria;Firmicutes;Clostridia;Clostridiales;Ruminococcaceae;unclassified_Ruminococcaceae	Firmicutes	Clostridia	Clostridiales	Ruminococcaceae	unclassified_Ruminococcaceae	0.000342009	M06047_81_000000000CBLT5_1_2110_8433_7879	0.000228611	7.62035e-05	4.28645e-05	0.00159075	4.76272e-05	0.000200034	5.71527e-05	5.71527e-05	0.000742985	0.000400069	0.000114305	0	5.71527e-05	0	5.71527e-05	0.000342916	0	0	0.000114305	0	5.71527e-05	0	0	0	0.0076013	0	0	0.00194319	0	0	0	0	0	0.000285763	5.71527e-05	5.71527e-05	5.71527e-05	0.000628679
Otu00376	Bacteria;Firmicutes;Erysipelotrichia;Erysipelotrichales;Erysipelotrichaceae;unclassified_Erysipelotrichaceae	Firmicutes	Erysipelotrichia	Erysipelotrichales	Erysipelotrichaceae	unclassified_Erysipelotrichaceae	0.000342009	M06047_81_000000000CBLT5_1_2118_14700_24075	0.000981121	0.000247662	0.00015717	0.000666781	0.000285763	8.5729e-05	0.000114305	0.000228611	0.000685832	0.000114305	0.00171458	0.00302909	5.71527e-05	5.71527e-05	0	0.000114305	5.71527e-05	0.00120021	5.71527e-05	0.000114305	5.71527e-05	0.000400069	0	5.71527e-05	0.000685832	0.0010859	0	0.0021718	5.71527e-05	5.71527e-05	0	0.00148597	0	0.000114305	0	0.000285763	5.71527e-05	0
Otu00377	Bacteria;Firmicutes;Clostridia;Clostridiales;Lachnospiraceae;unclassified_Lachnospiraceae	Firmicutes	Clostridia	Clostridiales	Lachnospiraceae	unclassified_Lachnospiraceae	0.000340194	M06047_81_000000000CBLT5_1_1114_10602_21877	0.000342916	0.000485798	0.00015717	0.000142882	0.000323865	0.000242899	0.000685832	0.000514374	0.000114305	0	0.000228611	0.000514374	0.000285763	0.00120021	0.000171458	0.000285763	0.000400069	0.000571527	0.000114305	0.000171458	0	0.000342916	0.000171458	0.000228611	0.000228611	0.000171458	0	5.71527e-05	0.000742985	0.000114305	0.000114305	0.000571527	0.000228611	0.000171458	0.000171458	0.000400069	0	0.000400069
Otu00378	Bacteria;Firmicutes;Clostridia;Clostridiales;Lachnospiraceae;unclassified_Lachnospiraceae	Firmicutes	Clostridia	Clostridiales	Lachnospiraceae	unclassified_Lachnospiraceae	0.00033838	M06047_81_000000000CBLT5_1_1115_16170_13598	0.000981121	0.000200034	7.14408e-05	0.000352441	0.000342916	0.00137166	0.000514374	0.00440075	0.000571527	0	0.000285763	0.000114305	0.00085729	5.71527e-05	0	0	0.000171458	0.000114305	0.000114305	5.71527e-05	0.000114305	0	0.000514374	0.000171458	5.71527e-05	0.000171458	0.00102875	0.000171458	0	0.000114305	0.00102875	0	5.71527e-05	0.00085729	0.000114305	0.00302909	0.0020575	0.000285763
Otu00379	Bacteria;Firmicutes;unclassified_Firmicutes;;;	Firmicutes	unclassified_Firmicutes				0.000337473	M06047_81_000000000CBLT5_1_1102_9104_5506	0.000161933	1.90509e-05	7.14408e-05	1.90509e-05	1.90509e-05	7.14408e-05	0.000114305	0	0.000171458	0.000114305	0	0.000571527	0.000114305	0	0	0	0	0	0	0	0.000285763	0	0	0	0	0.000114305	0	0	0	5.71527e-05	0	0	5.71527e-05	0	0	0.000285763	0	0
Otu00380	Bacteria;Firmicutes;Clostridia;Clostridiales;Ruminococcaceae;unclassified_Ruminococcaceae	Firmicutes	Clostridia	Clostridiales	Ruminococcaceae	unclassified_Ruminococcaceae	0.000336566	C70117_71_000000000C45C2_1_2114_8253_16020	0.00031434	0.000466747	0.000228611	0.000190509	0.000285763	0.000100017	5.71527e-05	0.000514374	0.00102875	0.000171458	0.000114305	0	0.000514374	0.000457221	0.000685832	0.000342916	0.000400069	0.000400069	0.000400069	0.000228611	5.71527e-05	0.000228611	0	0	0	0	0.00114305	0	0	5.71527e-05	0.00102875	0.000571527	5.71527e-05	0	0.000342916	0	5.71527e-05	0
Otu00381	Bacteria;Actinobacteria;Actinobacteria;Coriobacteriales;Coriobacteriaceae;unclassified_Coriobacteriaceae	Actinobacteria	Actinobacteria	Coriobacteriales	Coriobacteriaceae	unclassified_Coriobacteriaceae	0.000333844	C70117_71_000000000C45C2_1_1114_21019_4756	0.000285763	0.000200034	0.000357204	0.000419119	0.000133356	0.000214322	0	0.000628679	5.71527e-05	0.000285763	0.000228611	0.000514374	0.000514374	5.71527e-05	0.000228611	0	0.000285763	0.000114305	0.000228611	0.000628679	0	0.000571527	0.000571527	0.00102875	0.000114305	0.000742985	5.71527e-05	0	0.000171458	0.000457221	0	0.000114305	5.71527e-05	0	0.000514374	0.000114305	5.71527e-05	0.000171458
Otu00382	Bacteria;Firmicutes;Clostridia;Clostridiales;Lachnospiraceae;Roseburia	Firmicutes	Clostridia	Clostridiales	Lachnospiraceae	Roseburia	0.000333844	M06047_81_000000000CBLT5_1_1114_17979_17151	4.76272e-05	1.90509e-05	0.000128593	9.52544e-05	0.000361967	0.00310053	5.71527e-05	0	0	0	5.71527e-05	0.000171458	0.000114305	0	0	0	0	0	0.000285763	0	0.000228611	0	0	0	0	0	0.000171458	0.000400069	0	0	0.000228611	0	5.71527e-05	0.00188604	0	0.000114305	0.0117163	0.000571527
Otu00383	Bacteria;Firmicutes;Clostridia;Clostridiales;unclassified_Clostridiales;	Firmicutes	Clostridia	Clostridiales	unclassified_Clostridiales		0.000332937	M06047_81_000000000CBLT5_1_2110_2233_11783	0.000457221	0.000381018	8.5729e-05	0.000257187	0.000304814	0.00038578	0.000400069	0.000342916	0.000171458	0.000171458	0.000800137	0.00085729	0.000285763	0.000628679	5.71527e-05	0.000457221	0.000171458	0.000685832	0	0	0	0.000342916	0.000114305	0.000114305	0.000171458	0.000571527	0.000342916	0.000228611	0.000285763	0.000114305	0.000342916	0.000114305	0.000800137	0.000171458	0.000228611	0.000628679	0.000342916	0.000342916
Otu00384	Bacteria;Proteobacteria;Alphaproteobacteria;Rhodobacterales;Rhodobacteraceae;unclassified_Rhodobacteraceae	Proteobacteria	Alphaproteobacteria	Rhodobacterales	Rhodobacteraceae	unclassified_Rhodobacteraceae	0.000332937	M06047_81_000000000CBLT5_1_1119_4361_16819	0.000219085	7.62035e-05	0	0	7.62035e-05	0	0	0	0	0.00125736	0	5.71527e-05	0	0.000400069	0	5.71527e-05	0	0	0	0	0	0	0	0	0	0	0	0	0.000457221	0	0	0	0	0	0	0	0	0
Otu00385	Bacteria;Firmicutes;Clostridia;Clostridiales;Ruminococcaceae;Oscillibacter	Firmicutes	Clostridia	Clostridiales	Ruminococcaceae	Oscillibacter	0.000331123	M06047_81_000000000CBLT5_1_1115_11749_20921	0.00020956	0.000200034	0.000114305	0.000381018	0.00033339	0.000485798	0.000114305	0.000114305	5.71527e-05	0.000171458	0.000628679	0.000171458	0.000171458	0.000342916	0.000400069	0.000114305	0	0.000171458	0.000114305	0.000171458	5.71527e-05	0.000114305	5.71527e-05	0	5.71527e-05	0.000400069	0.000228611	0.00154312	0	0.000171458	0.000228611	0.000114305	0.000114305	0.00137166	0.000171458	0.000800137	0.000571527	0.000400069
Otu00386	Bacteria;Firmicutes;Clostridia;Clostridiales;Ruminococcaceae;unclassified_Ruminococcaceae	Firmicutes	Clostridia	Clostridiales	Ruminococcaceae	unclassified_Ruminococcaceae	0.000330215	M06047_81_000000000CBLT5_1_2115_22612_18278	0.000247662	5.71527e-05	1.42882e-05	0.000428645	0.000838239	0.00120021	0.000114305	0.000342916	5.71527e-05	0.000571527	0.000171458	0.000228611	5.71527e-05	0.000171458	0	0.000114305	0	0	5.71527e-05	0	0	0	0	5.71527e-05	0.000171458	0.000171458	0.00160027	0.000571527	0	0.000228611	0.000685832	5.71527e-05	0.000685832	0.00337201	0.000228611	0.00194319	0.00245756	0.000171458
Otu00387	Bacteria;Firmicutes;Clostridia;Clostridiales;Clostridiaceae 1;Clostridium sensu stricto	Firmicutes	Clostridia	Clostridiales	Clostridiaceae 1	Clostridium sensu stricto	0.000326587	M06047_81_000000000CBLT5_1_1115_12875_11864	2.85763e-05	3.81018e-05	0.000985883	0.000485798	7.62035e-05	0.000128593	0.000114305	0	5.71527e-05	0	0	0	5.71527e-05	0.000114305	5.71527e-05	0	0	0	0.000114305	0.000114305	0.00371492	0	0.000685832	0.00200034	0.000228611	0	0	0	0.000342916	0.000114305	0	0	0	0	0.000285763	0	0	0.000228611
Otu00388	Bacteria;Firmicutes;Clostridia;Clostridiales;Ruminococcaceae;unclassified_Ruminococcaceae	Firmicutes	Clostridia	Clostridiales	Ruminococcaceae	unclassified_Ruminococcaceae	0.000322958	M06047_81_000000000CBLT5_1_1114_12163_6210	0.000133356	0.00105732	0.00102875	3.81018e-05	0.000504848	0.00054295	5.71527e-05	0	0.000228611	0.000171458	0.000342916	0	0.000114305	0.00211465	0.00131451	0.000742985	0.000914442	0.00114305	0.00131451	0.00182888	5.71527e-05	0.000914442	0	5.71527e-05	0	5.71527e-05	0.000114305	0	0.00114305	0.00114305	5.71527e-05	0.000685832	0	0	0.00194319	0	5.71527e-05	0.000171458
Otu00389	Bacteria;Proteobacteria;Deltaproteobacteria;Desulfovibrionales;Desulfovibrionaceae;Bilophila	Proteobacteria	Deltaproteobacteria	Desulfovibrionales	Desulfovibrionaceae	Bilophila	0.000320236	C70117_71_000000000C45C2_1_2118_24769_17617	0.000390543	0.000123831	0	0.00031434	0.000523899	0.000671544	0.000514374	0.000628679	0.000285763	5.71527e-05	0.000285763	0.000571527	0.000171458	0.000285763	0.000114305	0.000114305	0	5.71527e-05	0	0	0	0	5.71527e-05	0.000285763	0.000114305	0.000171458	0.00120021	5.71527e-05	0	0.000457221	0.000914442	0	0.00137166	0.000400069	5.71527e-05	0.00154312	0.000914442	0.000171458
Otu00390	Bacteria;Firmicutes;Clostridia;Clostridiales;Ruminococcaceae;unclassified_Ruminococcaceae	Firmicutes	Clostridia	Clostridiales	Ruminococcaceae	unclassified_Ruminococcaceae	0.000319329	C70117_71_000000000C45C2_1_2105_16363_5955	0.000409594	0.000180983	8.5729e-05	0.000295289	0.000476272	0.000900154	0	0.000800137	0.000342916	0.000285763	0.000571527	0.000457221	0.000457221	5.71527e-05	0.000342916	0.000114305	5.71527e-05	5.71527e-05	0.000171458	5.71527e-05	5.71527e-05	5.71527e-05	5.71527e-05	0	0.000457221	0	0.00085729	0.000400069	5.71527e-05	0.000285763	0.000571527	0	0.000228611	0.00171458	0.000228611	0.00177173	0.00142882	0.000171458
Otu00391	Bacteria;Firmicutes;Bacilli;Lactobacillales;Streptococcaceae;Streptococcus	Firmicutes	Bacilli	Lactobacillales	Streptococcaceae	Streptococcus	0.000318422	C70117_71_000000000C45C2_1_2116_11769_7702	9.52544e-05	0.000200034	0.000557238	0.00031434	0.00020956	0.000171458	0.000342916	0	0	5.71527e-05	5.71527e-05	0.000114305	0.000171458	0.000342916	0.000114305	0.000171458	0.000285763	0.000114305	0.00137166	0.000228611	0.000571527	5.71527e-05	0.000171458	0.000400069	0.000114305	0.00114305	0	5.71527e-05	5.71527e-05	0.000400069	0.000342916	0.000228611	5.71527e-05	0.000171458	0.000457221	5.71527e-05	0.000171458	0
Otu00392	Bacteria;Bacteroidetes;Bacteroidia;Bacteroidales;Porphyromonadaceae;unclassified_Porphyromonadaceae	Bacteroidetes	Bacteroidia	Bacteroidales	Porphyromonadaceae	unclassified_Porphyromonadaceae	0.000317515	M06047_81_000000000CBLT5_1_1103_24287_8209	0.000295289	0.000142882	0.00138595	5.71527e-05	0.000142882	4.28645e-05	0.000400069	0.000285763	0.000457221	0.000114305	0.000171458	0.000342916	0.000171458	0	0.000114305	0.000285763	0.000228611	5.71527e-05	0.00200034	0.00142882	0.000514374	0.00160027	0	0.000114305	0	0.000228611	0	0	0.000114305	0.000628679	0	0.000114305	0	0	0.000114305	0	0	5.71527e-05
Otu00393	Bacteria;Firmicutes;Clostridia;Clostridiales;unclassified_Clostridiales;	Firmicutes	Clostridia	Clostridiales	unclassified_Clostridiales		0.000314793	M06047_81_000000000CBLT5_1_1104_10596_5044	9.52544e-06	0.00109543	0.000943019	7.62035e-05	0.001124	0.000371492	0	5.71527e-05	0	0	0	0	0.000114305	0.000228611	0.000114305	0.000342916	0.0021718	0.00360062	5.71527e-05	0.00251472	0	0.00120021	0	0	0	0.000457221	0	0	0.00354346	0.000114305	0.000171458	0.00291479	0	0	0.00148597	0	0	0
Otu00394	Bacteria;Bacteroidetes;Bacteroidia;Bacteroidales;Porphyromonadaceae;unclassified_Porphyromonadaceae	Bacteroidetes	Bacteroidia	Bacteroidales	Porphyromonadaceae	unclassified_Porphyromonadaceae	0.000312979	M06047_81_000000000CBLT5_1_2118_6080_21750	0.000981121	0.000180983	0.000114305	9.52544e-05	0.000133356	0.000300051	0.00188604	0.000342916	0.00165743	0.00137166	0.000400069	0.000228611	0.000400069	0.000285763	0.000228611	5.71527e-05	0	0.000114305	0.000285763	5.71527e-05	5.71527e-05	5.71527e-05	0	0	0.000400069	0.000171458	0	0	0	5.71527e-05	5.71527e-05	0	0	0.000685832	0.000114305	0.000228611	0.000400069	0.000457221
Otu00395	Bacteria;Firmicutes;Clostridia;Clostridiales;Lachnospiraceae;unclassified_Lachnospiraceae	Firmicutes	Clostridia	Clostridiales	Lachnospiraceae	unclassified_Lachnospiraceae	0.000312072	M06047_81_000000000CBLT5_1_1113_28103_14238	7.62035e-05	0.00010478	0	0.000152407	0.000352441	0.000285763	0.000114305	0.000114305	0	0	0.000171458	5.71527e-05	0.000114305	5.71527e-05	0.000114305	0.000228611	0.000114305	0	0	0	0	0	0	0	5.71527e-05	0.000285763	0.000457221	0.000114305	0	0.000114305	0.000171458	5.71527e-05	0.00120021	0.000571527	0	0.0010859	5.71527e-05	0
Otu00396	Bacteria;Firmicutes;Clostridia;Clostridiales;Lachnospiraceae;unclassified_Lachnospiraceae	Firmicutes	Clostridia	Clostridiales	Lachnospiraceae	unclassified_Lachnospiraceae	0.000311164	M06047_81_000000000CBLT5_1_1103_5250_10238	2.85763e-05	9.52544e-05	0	7.62035e-05	0.000161933	0.000585815	0	5.71527e-05	0	0.000114305	0	0	0.000400069	0	0.000114305	5.71527e-05	0	0	0	0	0	0	0	0	0.000228611	0	5.71527e-05	0.000171458	5.71527e-05	0	0.000114305	0	0.000342916	0.000457221	5.71527e-05	0.000114305	0.00182888	0.000342916
Otu00397	Bacteria;Actinobacteria;Actinobacteria;Actinomycetales;Corynebacteriaceae;Corynebacterium	Actinobacteria	Actinobacteria	Actinomycetales	Corynebacteriaceae	Corynebacterium	0.000310257	M01394_160_000000000C9RJW_1_1107_8919_14574	0	0	0	0.000228611	0.000266712	0.00191461	0	0	0	0	0	0	0	0	0	0	0	0	0	0	0	0	0	0	0.000800137	0	0.000400069	0.000171458	0	0	0.000228611	0	0.000285763	0.0010859	0	0.00137166	0.00628679	0
Otu00398	Bacteria;Firmicutes;Clostridia;Clostridiales;Ruminococcaceae;unclassified_Ruminococcaceae	Firmicutes	Clostridia	Clostridiales	Ruminococcaceae	unclassified_Ruminococcaceae	0.000303907	C70117_71_000000000C45C2_1_1109_20305_19378	0.00033339	0.000238136	7.14408e-05	0.000219085	0.000600103	0.000371492	0.000400069	0.000400069	0.000114305	5.71527e-05	0.000628679	0.000400069	0.000685832	0.000285763	0.000285763	5.71527e-05	5.71527e-05	5.71527e-05	0.000285763	0	0	0	0.000171458	0	0.000114305	0.000171458	0.000457221	0.000400069	5.71527e-05	0.000914442	0.000457221	0	0.000457221	0.00171458	5.71527e-05	0.000800137	0.000285763	0.000342916
Otu00399	Bacteria;Firmicutes;Clostridia;Clostridiales;Ruminococcaceae;Ruminococcus	Firmicutes	Clostridia	Clostridiales	Ruminococcaceae	Ruminococcus	0.000303907	M06047_81_000000000CBLT5_1_1101_18496_14761	0.00075251	0.000933493	0	0.00010478	0.0011621	0	0.000571527	0.000228611	0.000400069	0.000171458	0.00285763	0.000285763	0.000571527	0.000285763	0.000285763	0.0042293	0.000228611	0	0	0	0	0	0	0	0	0.000628679	0	0	5.71527e-05	0.00662971	0	0.000285763	0	0	0	0	0	0
Otu00400	Bacteria;Firmicutes;unclassified_Firmicutes;;;	Firmicutes	unclassified_Firmicutes				0.000303	M06047_81_000000000CBLT5_1_1108_27930_16286	0.000180983	4.76272e-05	1.42882e-05	0.000809663	0.00031434	1.42882e-05	5.71527e-05	0	0.000285763	0	0.000628679	0.000114305	5.71527e-05	0.000114305	0	0	5.71527e-05	5.71527e-05	5.71527e-05	0	0	0	0	0	0.00285763	0.000342916	5.71527e-05	0.00160027	0	0.00165743	0	0	0.000114305	0.000114305	0	0	5.71527e-05	0
Otu00401	Bacteria;Firmicutes;Clostridia;Clostridiales;Lachnospiraceae;unclassified_Lachnospiraceae	Firmicutes	Clostridia	Clostridiales	Lachnospiraceae	unclassified_Lachnospiraceae	0.000300278	M06047_81_000000000CBLT5_1_2104_6175_10147	0.000276238	0.000171458	4.28645e-05	2.85763e-05	0.000161933	0.000757273	0.000228611	0.000228611	0.000800137	5.71527e-05	0.000228611	0.000114305	0.000228611	0.000285763	0.000114305	0.000285763	5.71527e-05	5.71527e-05	5.71527e-05	0	5.71527e-05	5.71527e-05	0	0	0	0.000114305	5.71527e-05	0	0	0.000285763	0	0	0	0.000685832	0.00262902	5.71527e-05	0.000228611	0.000114305
Otu00402	Bacteria;Bacteroidetes;Bacteroidia;Bacteroidales;Porphyromonadaceae;Parabacteroides	Bacteroidetes	Bacteroidia	Bacteroidales	Porphyromonadaceae	Parabacteroides	0.000299371	C70117_71_000000000C45C2_1_2116_22112_2858	0.000238136	0.000142882	0.000285763	0.000485798	0.000409594	7.14408e-05	0.000114305	0.000457221	0.000342916	0.000171458	0.000171458	0.000171458	0.000114305	5.71527e-05	0.000228611	0.000171458	0.000114305	0.000171458	0.000114305	0.000514374	0.000171458	0.000342916	0.00085729	0.00085729	0.000457221	0.000400069	0	0.000342916	0.000514374	0.000228611	0.000285763	0.000742985	0.000571527	0.000114305	5.71527e-05	5.71527e-05	0	0.000171458
Otu00403	Bacteria;Firmicutes;Clostridia;Clostridiales;unclassified_Clostridiales;	Firmicutes	Clostridia	Clostridiales	unclassified_Clostridiales		0.000299371	M03062_118_000000000CKCW4_1_2104_10619_23711	0.000390543	0.000666781	1.42882e-05	9.52544e-05	0.00020956	4.28645e-05	0.000457221	0.000628679	0	0	0.000571527	0.000685832	0.00131451	0.00154312	0.000400069	0.000400069	5.71527e-05	0.000285763	0	0	5.71527e-05	0	0	5.71527e-05	0	0.000514374	0	0	0	0.00120021	0	5.71527e-05	0	0	5.71527e-05	0	0.000114305	0
Otu00404	Bacteria;Actinobacteria;Actinobacteria;Actinomycetales;Propionibacteriaceae;Propionibacterium	Actinobacteria	Actinobacteria	Actinomycetales	Propionibacteriaceae	Propionibacterium	0.000296649	M01394_160_000000000C9RJW_1_2103_27424_13911	0	0	0	0.000323865	0.000981121	0.000257187	0	0	0	0	0	0	0	0	0	0	0	0	0	0	0	0	0	0	0.000171458	0	0.00160027	0.000171458	0	0	0.00508659	0	0.000171458	0.000628679	0	0.000285763	0.000742985	0
Otu00405	Bacteria;Firmicutes;Clostridia;Clostridiales;Lachnospiraceae;unclassified_Lachnospiraceae	Firmicutes	Clostridia	Clostridiales	Lachnospiraceae	unclassified_Lachnospiraceae	0.000296649	M06047_81_000000000CBLT5_1_1119_5461_12264	0.00248614	0.000161933	2.85763e-05	7.62035e-05	4.76272e-05	0.000171458	0	0.000171458	5.71527e-05	0.0146311	5.71527e-05	0	0.000571527	0	0.000171458	0.000228611	0	0	0	0	0.000114305	0	5.71527e-05	0.000342916	0	5.71527e-05	0	0	5.71527e-05	0	0	0	5.71527e-05	0.000171458	0	0.000685832	0	0
Otu00406	Bacteria;Bacteroidetes;Bacteroidia;Bacteroidales;Porphyromonadaceae;unclassified_Porphyromonadaceae	Bacteroidetes	Bacteroidia	Bacteroidales	Porphyromonadaceae	unclassified_Porphyromonadaceae	0.000293928	M06047_81_000000000CBLT5_1_2102_16903_17511	0.000323865	0.000161933	0.000200034	5.71527e-05	7.62035e-05	4.28645e-05	0	5.71527e-05	0.00125736	0.000400069	0.000114305	0.000114305	0.000171458	0.000228611	0.000171458	0.000228611	0	0.000171458	0.000685832	5.71527e-05	5.71527e-05	0	0	0	0	0	0.000285763	5.71527e-05	0	5.71527e-05	0.000342916	5.71527e-05	0	0	0.000171458	0	0	0
Otu00407	Bacteria;Bacteroidetes;Bacteroidia;Bacteroidales;Porphyromonadaceae;unclassified_Porphyromonadaceae	Bacteroidetes	Bacteroidia	Bacteroidales	Porphyromonadaceae	unclassified_Porphyromonadaceae	0.000293021	M06047_81_000000000CBLT5_1_1113_23988_6698	4.76272e-05	0	0	0	9.52544e-06	0.000128593	0.000228611	0	0	0	5.71527e-05	0	0	0	0	0	0	0	0	0	0	0	0	0	0	0	0	0	0	5.71527e-05	0	0	0	0	0	0	0.000342916	0.000171458
Otu00408	Bacteria;Firmicutes;Clostridia;Clostridiales;Lachnospiraceae;unclassified_Lachnospiraceae	Firmicutes	Clostridia	Clostridiales	Lachnospiraceae	unclassified_Lachnospiraceae	0.000290299	M06047_81_000000000CBLT5_1_1101_21969_18720	0.000142882	3.81018e-05	2.85763e-05	0.000171458	0.000504848	0.000200034	0.000171458	0.000342916	5.71527e-05	0	0.000228611	5.71527e-05	0	0.000114305	0.000114305	0	0	0	5.71527e-05	5.71527e-05	0	0	0	5.71527e-05	0.000171458	0	0.000514374	0.000285763	0	0	0.000228611	0	0.000457221	0.00234326	5.71527e-05	0.000571527	0.000171458	0
Otu00409	Bacteria;Firmicutes;Clostridia;Clostridiales;Lachnospiraceae;unclassified_Lachnospiraceae	Firmicutes	Clostridia	Clostridiales	Lachnospiraceae	unclassified_Lachnospiraceae	0.000287578	M03062_107_000000000CBKND_1_1105_19657_12536	0.00173363	0.000933493	8.5729e-05	9.52544e-06	8.5729e-05	2.85763e-05	0	0.000171458	0.000628679	0	0.00885866	0.000742985	0.000114305	0	5.71527e-05	0.000342916	0.0043436	0.000742985	0	5.71527e-05	0	0.000285763	0	0	0	0	0	5.71527e-05	5.71527e-05	5.71527e-05	0	0.000228611	0	0.000171458	0.000114305	0	0	0
Otu00410	Bacteria;Bacteroidetes;Bacteroidia;Bacteroidales;Bacteroidaceae;Bacteroides	Bacteroidetes	Bacteroidia	Bacteroidales	Bacteroidaceae	Bacteroides	0.000282135	M06047_81_000000000CBLT5_1_2108_11226_20996	0.000257187	0.000838239	0.000371492	0	0.00010478	0.000414357	0	0.00085729	0	0	0.000685832	0	0	0	0	0.000628679	0.0043436	5.71527e-05	0.000742985	0.000228611	0.000514374	0	0	0	0	0	0	0	0	0	0	0.000628679	0	0	0	0	0	0.00165743
Otu00411	Bacteria;Bacteroidetes;Bacteroidia;Bacteroidales;unclassified_Bacteroidales;	Bacteroidetes	Bacteroidia	Bacteroidales	unclassified_Bacteroidales		0.000278506	C70117_71_000000000C45C2_1_2115_4346_17132	0.000866815	0.00111448	0	0.000123831	4.76272e-05	0	0	0.000285763	0.000114305	0.000114305	0.00445791	0.000228611	5.71527e-05	0.000228611	0.000114305	0.00577242	0.000342916	0.000171458	0	0	0	0	0.000285763	0.000400069	0	5.71527e-05	0	0	0.000228611	0	0	5.71527e-05	0	0	0	0	0	0
Otu00412	Bacteria;Firmicutes;Clostridia;Clostridiales;Lachnospiraceae;unclassified_Lachnospiraceae	Firmicutes	Clostridia	Clostridiales	Lachnospiraceae	unclassified_Lachnospiraceae	0.000278506	M06047_81_000000000CBLT5_1_2108_3732_14603	0.000552476	7.62035e-05	1.42882e-05	0.000123831	0.000304814	0.000285763	0.000342916	0.00251472	0.000114305	0	0.000228611	0.000114305	0	0.000171458	0	0.000285763	0	0	0	0	0	5.71527e-05	0	5.71527e-05	0	0	0.000685832	0	0	0.000971595	0.000514374	0	0	0.000342916	0.000171458	0.00085729	0	0.000114305
Otu00413	Bacteria;Firmicutes;Clostridia;Clostridiales;Lachnospiraceae;Clostridium XlVa	Firmicutes	Clostridia	Clostridiales	Lachnospiraceae	Clostridium XlVa	0.000277599	C70117_71_000000000C45C2_1_2113_19317_12093	0.000171458	7.62035e-05	0	0.000285763	0.000733459	0.00104304	0.000114305	0.000514374	5.71527e-05	5.71527e-05	0.000171458	0.000114305	5.71527e-05	0.000228611	0	0	0	0.000171458	0	0	0	0	0	0	0.000114305	0	0.000971595	0.000628679	0	0.000114305	0.000971595	0	0.000628679	0.00268617	0.000114305	0.00165743	0.00240041	0
Otu00414	Bacteria;Firmicutes;Clostridia;Clostridiales;Ruminococcaceae;unclassified_Ruminococcaceae	Firmicutes	Clostridia	Clostridiales	Ruminococcaceae	unclassified_Ruminococcaceae	0.000276691	M06047_81_000000000CBLT5_1_1101_10178_5261	4.76272e-05	4.76272e-05	4.28645e-05	0.00143834	0.000247662	1.42882e-05	0	5.71527e-05	0.000171458	0	5.71527e-05	0	0.000228611	0	0	0	0	5.71527e-05	0.000114305	0	0	5.71527e-05	0.000228611	0.000285763	0.00588672	0.000914442	0.000400069	0.000914442	0.000228611	0.000342916	0.000457221	0	0.000400069	5.71527e-05	0	0	5.71527e-05	0
Otu00415	Bacteria;Firmicutes;Clostridia;Clostridiales;Lachnospiraceae;Lachnospiracea_incertae_sedis	Firmicutes	Clostridia	Clostridiales	Lachnospiraceae	Lachnospiracea_incertae_sedis	0.000275784	M03062_107_000000000CBKND_1_2106_22395_8794	0.000485798	0.00054295	0.000457221	0	0.000609628	0.000128593	0	0.00137166	0	0	0.00154312	0	0	0	0	0.00137166	0.00182888	5.71527e-05	0.000114305	0.00165743	5.71527e-05	0	0	0	0	0	0	0	0	0	0	0.00365777	0	0	0	0	0	0.000514374
Otu00416	Bacteria;Firmicutes;Clostridia;Clostridiales;Lachnospiraceae;unclassified_Lachnospiraceae	Firmicutes	Clostridia	Clostridiales	Lachnospiraceae	unclassified_Lachnospiraceae	0.000274877	M01394_160_000000000C9RJW_1_1119_13804_15858	0.00075251	3.81018e-05	0	0.00033339	0.000495323	0.00015717	0.000514374	0.000342916	0.00240041	0.000971595	0.000228611	5.71527e-05	5.71527e-05	0	0	5.71527e-05	5.71527e-05	5.71527e-05	0	0	0	0	0	0	0	0.000171458	0.00177173	5.71527e-05	5.71527e-05	0.000228611	0.0021718	0	0.000400069	0.000114305	0	0.000342916	0.000285763	0
Otu00417	Bacteria;Firmicutes;Clostridia;Clostridiales;Lachnospiraceae;unclassified_Lachnospiraceae	Firmicutes	Clostridia	Clostridiales	Lachnospiraceae	unclassified_Lachnospiraceae	0.000274877	C70117_71_000000000C45C2_1_1110_18509_2498	6.66781e-05	0.000123831	0.000128593	0.000723934	0.000228611	0.000257187	0	0	0.000114305	0.000171458	5.71527e-05	5.71527e-05	0.000228611	5.71527e-05	5.71527e-05	0.000228611	5.71527e-05	0.000114305	0.000285763	5.71527e-05	0	0.000171458	5.71527e-05	0	0.000685832	0.00177173	0.000914442	0.000914442	5.71527e-05	0.000171458	0.000628679	0.000114305	5.71527e-05	0.000342916	0	0.000571527	0.000457221	0
Otu00418	Bacteria;Bacteroidetes;Bacteroidia;Bacteroidales;Rikenellaceae;Alistipes	Bacteroidetes	Bacteroidia	Bacteroidales	Rikenellaceae	Alistipes	0.000273063	M06047_81_000000000CBLT5_1_2102_15036_4915	9.52544e-06	0.000381018	0.00260045	0.000114305	0.000352441	4.28645e-05	0	0	5.71527e-05	0	0	0	0.000114305	0	0.000114305	5.71527e-05	0.000400069	0.00160027	0.000514374	0.00508659	0.000228611	0.00457221	0.000171458	0.000228611	5.71527e-05	0.000171458	0	5.71527e-05	0.00188604	0	5.71527e-05	0.000171458	0	0	0.000114305	0	0	5.71527e-05
Otu00419	Bacteria;Firmicutes;Clostridia;Clostridiales;unclassified_Clostridiales;	Firmicutes	Clostridia	Clostridiales	unclassified_Clostridiales		0.00026762	M03062_107_000000000CBKND_1_2108_24000_13594	0.000180983	0.000190509	0	1.90509e-05	1.90509e-05	4.28645e-05	5.71527e-05	0.000914442	0	0	5.71527e-05	5.71527e-05	0	5.71527e-05	0.000285763	0.000457221	0.000228611	0.000114305	0	0	0	0	0	0	0	5.71527e-05	0	5.71527e-05	0	0.000114305	0	0	0	0	5.71527e-05	0	0	0.000114305
Otu00420	Bacteria;Proteobacteria;Betaproteobacteria;Burkholderiales;Sutterellaceae;Parasutterella	Proteobacteria	Betaproteobacteria	Burkholderiales	Sutterellaceae	Parasutterella	0.000265805	M06047_81_000000000CBLT5_1_1103_18841_10068	5.71527e-05	0	2.85763e-05	0.00075251	1.90509e-05	0.00054295	0.000114305	0.000228611	0	0	0	0	0	0	0	0	0	0	0	0	0	0.000114305	5.71527e-05	0	0.00354346	0.000342916	0	0.000571527	5.71527e-05	5.71527e-05	0	0	0	0	0.000114305	0	0.000285763	0.00177173
Otu00421	Bacteria;Proteobacteria;Deltaproteobacteria;Desulfovibrionales;unclassified_Desulfovibrionales;	Proteobacteria	Deltaproteobacteria	Desulfovibrionales	unclassified_Desulfovibrionales		0.000263991	C70117_71_000000000C45C2_1_2106_11333_7713	0.000247662	0.00054295	0.000185746	0.000390543	0.000409594	4.28645e-05	0.000114305	0.000114305	0.000285763	5.71527e-05	0.000285763	0.000628679	0.000114305	0	5.71527e-05	5.71527e-05	0.000171458	0.00285763	5.71527e-05	0.000514374	0	0.000171458	0.000800137	5.71527e-05	0.000228611	0.00085729	0.000171458	0.000228611	0.000285763	0.000114305	0.000228611	0.00154312	0.000171458	0.000114305	0	5.71527e-05	0.000114305	0
Otu00422	Bacteria;Firmicutes;Clostridia;Clostridiales;Lachnospiraceae;unclassified_Lachnospiraceae	Firmicutes	Clostridia	Clostridiales	Lachnospiraceae	unclassified_Lachnospiraceae	0.000263084	C70117_71_000000000C45C2_1_1112_15709_16359	0.000266712	0.000190509	7.14408e-05	0.000457221	0.000866815	0.000557238	0	0.000285763	0.000114305	5.71527e-05	0.000114305	0.00102875	0.000514374	0.000514374	5.71527e-05	5.71527e-05	0	0	0.000228611	0	0	5.71527e-05	0	0	5.71527e-05	0	0.00245756	0.000228611	5.71527e-05	0.000171458	0.00280048	0	0.000742985	0.00142882	0.000400069	0.000628679	0.000628679	0.000571527
Otu00423	Bacteria;Bacteroidetes;Bacteroidia;Bacteroidales;Porphyromonadaceae;unclassified_Porphyromonadaceae	Bacteroidetes	Bacteroidia	Bacteroidales	Porphyromonadaceae	unclassified_Porphyromonadaceae	0.000262176	M06047_81_000000000CBLT5_1_2109_5008_13457	0.000704883	0.000619154	1.42882e-05	0.000390543	0.000457221	0.000128593	0.00085729	0.000342916	0.000571527	0.000228611	0.00102875	0.00120021	0.000228611	0.000914442	0.000400069	0.00114305	0.000285763	0.000742985	0	0	5.71527e-05	0	0.000342916	0.000628679	5.71527e-05	0.00102875	0.000171458	0.000114305	0.000228611	0.00182888	0.000285763	0.000171458	5.71527e-05	0.000171458	0.000171458	0.000114305	0.000228611	0
Otu00424	Bacteria;Firmicutes;Clostridia;Clostridiales;Lachnospiraceae;Acetatifactor	Firmicutes	Clostridia	Clostridiales	Lachnospiraceae	Acetatifactor	0.000259455	M03062_107_000000000CBKND_1_1119_24633_14481	0.000371492	5.71527e-05	1.42882e-05	0.000114305	0.000409594	0.000728696	0.000514374	0.000914442	0.000628679	5.71527e-05	0	0.000114305	0.000171458	0	0.000114305	0	5.71527e-05	0	0	0	5.71527e-05	0	0	5.71527e-05	0.000171458	0	0.000342916	0.000114305	5.71527e-05	0.000171458	0.000114305	0	5.71527e-05	0.0020575	5.71527e-05	0.0010859	0.0010859	0.000685832
Otu00425	Bacteria;Bacteroidetes;Bacteroidia;Bacteroidales;Porphyromonadaceae;Barnesiella	Bacteroidetes	Bacteroidia	Bacteroidales	Porphyromonadaceae	Barnesiella	0.000259455	M06047_81_000000000CBLT5_1_1110_21989_8827	8.5729e-05	0.000676306	0.000671544	0.000152407	0.000152407	0.000671544	0	0.000285763	5.71527e-05	0	0.000114305	5.71527e-05	5.71527e-05	0.000971595	0.0010859	0.000285763	0.000400069	0.00125736	5.71527e-05	0.00142882	0.000342916	0.00085729	0	0	0.000171458	0.000228611	5.71527e-05	0.000457221	0.000228611	0.000114305	0	0.000171458	0	0.000400069	5.71527e-05	0	0.00102875	0.00160027
Otu00426	Bacteria;Firmicutes;Clostridia;Clostridiales;Lachnospiraceae;unclassified_Lachnospiraceae	Firmicutes	Clostridia	Clostridiales	Lachnospiraceae	unclassified_Lachnospiraceae	0.000258548	C70117_71_000000000C45C2_1_2116_17037_14842	0.000238136	6.66781e-05	1.42882e-05	9.52544e-05	0.000361967	0.000328628	0.000171458	0.000457221	0.000457221	0	0	0.000342916	0.000342916	5.71527e-05	0	0	0	0	0	5.71527e-05	0	0	0	5.71527e-05	5.71527e-05	5.71527e-05	0.000400069	0	0	0.000114305	0.000285763	0	0.000114305	0.00165743	0.000171458	0.000742985	0.000400069	0
Otu00427	Bacteria;Chloroflexi;Chloroflexia;Chloroflexales;Chloroflexineae;unclassified_Chloroflexineae	Chloroflexi	Chloroflexia	Chloroflexales	Chloroflexineae	unclassified_Chloroflexineae	0.000257641	M03062_118_000000000CKCW4_1_2107_27204_15894	0	0	0	0	9.52544e-06	0	0	0	0	0	0	0	0	0	0	0	0	0	0	0	0	0	0	0	0	0	0	0	0	0	5.71527e-05	0	0	0	0	0	0	0
Otu00428	Bacteria;Bacteroidetes;Bacteroidia;Bacteroidales;Porphyromonadaceae;unclassified_Porphyromonadaceae	Bacteroidetes	Bacteroidia	Bacteroidales	Porphyromonadaceae	unclassified_Porphyromonadaceae	0.000256733	M06047_81_000000000CBLT5_1_2113_11403_12030	2.85763e-05	4.76272e-05	0.000200034	0.000952544	0.000219085	0.000457221	5.71527e-05	5.71527e-05	0	0	0	5.71527e-05	0	0	0	5.71527e-05	0.000228611	0	0.000171458	0.000171458	0	0.000457221	0	0	0.00268617	0.000228611	0	0.00280048	0	0.000114305	0	0	0.000114305	0.0010859	0	0	0.00114305	0.000685832
Otu00429	Bacteria;Firmicutes;Clostridia;Clostridiales;unclassified_Clostridiales;	Firmicutes	Clostridia	Clostridiales	unclassified_Clostridiales		0.000255826	M03062_107_000000000CBKND_1_2114_15418_15052	4.76272e-05	0.000866815	0.00147168	2.85763e-05	0.000609628	1.42882e-05	0	0.000114305	5.71527e-05	0	5.71527e-05	5.71527e-05	0.000228611	0	0.000171458	0.000285763	0.00131451	0.00320055	0.000171458	0.00280048	5.71527e-05	0.00285763	5.71527e-05	0	0	5.71527e-05	5.71527e-05	0	0.0010859	0.000114305	0	0.00245756	0	0	5.71527e-05	0	0	0
Otu00430	Bacteria;Firmicutes;Clostridia;Clostridiales;unclassified_Clostridiales;	Firmicutes	Clostridia	Clostridiales	unclassified_Clostridiales		0.000254919	M06047_81_000000000CBLT5_1_1116_7292_11059	0.000171458	0.000714408	0.000271475	8.5729e-05	0.000428645	8.5729e-05	0.000285763	0.000228611	0.000228611	0.000114305	5.71527e-05	0.000114305	0.000285763	0.00102875	0.000914442	0.00102875	0.00085729	0.000171458	0.000342916	0.000400069	0	0.000342916	0	0	0	0.000457221	5.71527e-05	0	0.000742985	0.000285763	0.000571527	0.000971595	0	0	0.000228611	5.71527e-05	0	5.71527e-05
Otu00431	Bacteria;Bacteroidetes;Flavobacteriia;Flavobacteriales;Cryomorphaceae;unclassified_Cryomorphaceae	Bacteroidetes	Flavobacteriia	Flavobacteriales	Cryomorphaceae	unclassified_Cryomorphaceae	0.000253105	M06047_81_000000000CBLT5_1_2110_11552_6318	7.62035e-05	2.85763e-05	0	1.90509e-05	5.71527e-05	0	0	0	0	0.000457221	0	0	0	0.000171458	0	0	0	0	0	0	0	0	0	0.000114305	0	0	0	0	0.000342916	0	0	0	0	0	0	0	0	0
Otu00432	Bacteria;Proteobacteria;Gammaproteobacteria;Oceanospirillales;Oceanospirillaceae;Neptuniibacter	Proteobacteria	Gammaproteobacteria	Oceanospirillales	Oceanospirillaceae	Neptuniibacter	0.000252197	M06047_81_000000000CBLT5_1_2114_7071_24113	9.52544e-06	0.000266712	0	0	0	0	0	0	0	0	5.71527e-05	0	0	0	5.71527e-05	0.00154312	0	0	0	0	0	0	0	0	0	0	0	0	0	0	0	0	0	0	0	0	0	0
Otu00433	Bacteria;Firmicutes;Clostridia;Clostridiales;Lachnospiraceae;unclassified_Lachnospiraceae	Firmicutes	Clostridia	Clostridiales	Lachnospiraceae	unclassified_Lachnospiraceae	0.000250383	M06047_81_000000000CBLT5_1_2106_9288_6279	6.66781e-05	0.000152407	5.71527e-05	6.66781e-05	0.000504848	0.000628679	5.71527e-05	5.71527e-05	5.71527e-05	5.71527e-05	0.000171458	0	0.000342916	0	0.000171458	0.000228611	0.000114305	5.71527e-05	0.000171458	0	5.71527e-05	0	0	0	0.000114305	0	0.000114305	0.000171458	5.71527e-05	5.71527e-05	0.000228611	0.000114305	0.00137166	0.00120021	0.000171458	0.00171458	0.000342916	0.000285763
Otu00434	Bacteria;Firmicutes;Clostridia;Clostridiales;unclassified_Clostridiales;	Firmicutes	Clostridia	Clostridiales	unclassified_Clostridiales		0.000248569	C70117_71_000000000C45C2_1_2110_24188_18667	1.90509e-05	0.000581052	0.00120021	1.90509e-05	0.000247662	0.000571527	0	0	5.71527e-05	0	0	5.71527e-05	0.000685832	0.000457221	0.00125736	0.0010859	0	0	0.000685832	0.00308624	0.000114305	0.000914442	0	0	0	0	0.000114305	0	0.000400069	0.000342916	5.71527e-05	0.000571527	5.71527e-05	5.71527e-05	0.0021718	0	0	0.000114305
Otu00435	Bacteria;Firmicutes;Clostridia;Clostridiales;Lachnospiraceae;unclassified_Lachnospiraceae	Firmicutes	Clostridia	Clostridiales	Lachnospiraceae	unclassified_Lachnospiraceae	0.000247662	M06047_81_000000000CBLT5_1_1102_18377_17291	0.000390543	0.000266712	7.14408e-05	0.000190509	0.000247662	0.000171458	0.000114305	0.000571527	0.000457221	0.000114305	0.000400069	0.000685832	0.000571527	0.000171458	0.000114305	0.000285763	0.000285763	0.000171458	0.000171458	0.000114305	0	0	0.000114305	0.000400069	0	0.000514374	0.000114305	0	0.000114305	0.000171458	0.000171458	0.000114305	0.000742985	0.000171458	0.000171458	0.000228611	0.000285763	0
Otu00436	Bacteria;Proteobacteria;Alphaproteobacteria;Rhodobacterales;Rhodobacteraceae;unclassified_Rhodobacteraceae	Proteobacteria	Alphaproteobacteria	Rhodobacterales	Rhodobacteraceae	unclassified_Rhodobacteraceae	0.000247662	M06047_81_000000000CBLT5_1_1102_11635_16076	0.000180983	7.62035e-05	0	1.90509e-05	0.00010478	0	0	0	0	0.0010859	0	0	0	0.000457221	0	0	0	0	0	0	0	0	0	0.000114305	0	0	0	0	0.000628679	0	0	0	0	0	0	0	0	0
Otu00437	Bacteria;Bacteroidetes;Bacteroidia;Bacteroidales;Rikenellaceae;Alistipes	Bacteroidetes	Bacteroidia	Bacteroidales	Rikenellaceae	Alistipes	0.000247662	C70117_71_000000000C45C2_1_1115_18394_21604	0.000123831	0.000257187	0.000271475	0.000447696	0.000133356	0.000128593	5.71527e-05	0.000114305	0	5.71527e-05	0.000228611	0.000285763	5.71527e-05	0.000285763	0.000171458	0.000228611	0.000285763	0.000514374	0.000114305	0.000400069	0.000228611	0.000342916	0.000114305	0.000400069	5.71527e-05	0.0010859	0.000342916	0.000685832	5.71527e-05	0	0.000342916	0.000285763	5.71527e-05	5.71527e-05	0	0.000171458	0.000114305	0.000228611
Otu00438	Bacteria;Firmicutes;unclassified_Firmicutes;;;	Firmicutes	unclassified_Firmicutes				0.00024494	M06047_81_000000000CBLT5_1_2114_14544_22872	0	0.000180983	1.42882e-05	9.52544e-06	9.52544e-06	0	0	0	0	0	0	0	0.000971595	0	0	0	5.71527e-05	5.71527e-05	0	5.71527e-05	0	0	5.71527e-05	0	0	0	0	0	0	0	0	0	0	5.71527e-05	0	0	0	0
Otu00439	Bacteria;Firmicutes;Clostridia;Clostridiales;Ruminococcaceae;unclassified_Ruminococcaceae	Firmicutes	Clostridia	Clostridiales	Ruminococcaceae	unclassified_Ruminococcaceae	0.00024494	M06047_81_000000000CBLT5_1_2115_18489_10223	0.000247662	0.000495323	0.000285763	0.000695357	0.000466747	0.000285763	0.000114305	0.000342916	0.000285763	0	0.000400069	0.000342916	0.000114305	0.000228611	0.00102875	0.000800137	0.000342916	0.000457221	0.000171458	0.000571527	5.71527e-05	0.000342916	0	0	0.000571527	0.00177173	0.000228611	0.00160027	0.000742985	0.000228611	0.000114305	0.00114305	0.000285763	0.000285763	0.000342916	0.000342916	0.000171458	0.000285763
Otu00440	Bacteria;Firmicutes;Clostridia;Clostridiales;Lachnospiraceae;Clostridium XlVa	Firmicutes	Clostridia	Clostridiales	Lachnospiraceae	Clostridium XlVa	0.000243126	M03062_107_000000000CBKND_1_2103_16388_4543	1.90509e-05	0.000285763	0.0013288	0.000152407	0.000714408	4.28645e-05	0	0	0	5.71527e-05	0	5.71527e-05	5.71527e-05	0.000228611	0.000171458	0	5.71527e-05	0.00120021	5.71527e-05	0.00194319	0.0031434	0.000171458	0.000171458	0	0.000171458	0	0.000514374	5.71527e-05	0.0032577	5.71527e-05	0.000285763	5.71527e-05	0.000228611	0.000400069	0	0.000114305	5.71527e-05	0
Otu00441	Bacteria;Firmicutes;unclassified_Firmicutes;;;	Firmicutes	unclassified_Firmicutes				0.000242218	C70117_71_000000000C45C2_1_2119_8596_18924	0.000247662	0.000114305	4.28645e-05	6.66781e-05	0.000123831	0.000271475	0.000742985	0.000114305	0.000114305	0.000114305	0.000342916	5.71527e-05	0.000342916	5.71527e-05	0	0.000228611	5.71527e-05	0	5.71527e-05	5.71527e-05	5.71527e-05	0	0	0	0	0.000171458	0.000171458	5.71527e-05	5.71527e-05	0.000285763	0.000114305	0	5.71527e-05	0.000228611	5.71527e-05	0.000228611	0.000628679	0.000171458
Otu00442	Bacteria;Firmicutes;Clostridia;Clostridiales;unclassified_Clostridiales;	Firmicutes	Clostridia	Clostridiales	unclassified_Clostridiales		0.000242218	M03062_107_000000000CBKND_1_1118_14371_5393	3.81018e-05	1.90509e-05	0	1.90509e-05	3.81018e-05	7.14408e-05	0	0.000114305	0	0.000114305	0	0	0.000114305	0	0	0	0	0	0	0	0	0	0	0	5.71527e-05	0	5.71527e-05	0	0	5.71527e-05	5.71527e-05	0	0	0.000114305	0	0.000171458	0	0.000114305
Otu00443	Bacteria;Firmicutes;Clostridia;Clostridiales;Ruminococcaceae;unclassified_Ruminococcaceae	Firmicutes	Clostridia	Clostridiales	Ruminococcaceae	unclassified_Ruminococcaceae	0.000242218	M06047_81_000000000CBLT5_1_1101_20179_14226	9.52544e-06	3.81018e-05	1.42882e-05	5.71527e-05	5.71527e-05	2.85763e-05	0	5.71527e-05	0	0	0	0	0	0	5.71527e-05	5.71527e-05	5.71527e-05	5.71527e-05	0	5.71527e-05	0	0	0	0	0.000114305	5.71527e-05	0.000114305	5.71527e-05	0	0	5.71527e-05	0.000171458	5.71527e-05	5.71527e-05	0	0	0	0.000114305
Otu00444	Bacteria;Firmicutes;Clostridia;Clostridiales;Lachnospiraceae;unclassified_Lachnospiraceae	Firmicutes	Clostridia	Clostridiales	Lachnospiraceae	unclassified_Lachnospiraceae	0.000241311	M06047_81_000000000CBLT5_1_2105_26376_13527	5.71527e-05	8.5729e-05	1.42882e-05	0.000466747	0.000600103	0.000785849	0	5.71527e-05	5.71527e-05	0	0.000114305	0.000114305	0.000285763	0	0	0.000228611	0	0	0	5.71527e-05	0	0	0	0	0	0	0.00280048	0	0	5.71527e-05	0.00268617	0	0.000285763	0.000571527	5.71527e-05	0.000285763	0.00274333	5.71527e-05
Otu00445	Bacteria;Firmicutes;Clostridia;Clostridiales;Ruminococcaceae;unclassified_Ruminococcaceae	Firmicutes	Clostridia	Clostridiales	Ruminococcaceae	unclassified_Ruminococcaceae	0.00023859	M06047_81_000000000CBLT5_1_2103_27603_6422	0.000247662	0.00010478	1.42882e-05	0.000161933	0.00031434	0.00054295	0.000171458	0.000571527	0.000171458	0.000114305	0.000457221	0	0.000342916	5.71527e-05	0	5.71527e-05	0.000171458	0	0	5.71527e-05	0	0	5.71527e-05	0	0	0.000228611	0.000457221	0.000228611	0	0.000285763	0.000285763	0	0.000342916	0.000971595	0.000228611	0.00102875	0.000800137	0.000114305
Otu00446	Bacteria;Bacteroidetes;Bacteroidia;Bacteroidales;Prevotellaceae;Prevotella	Bacteroidetes	Bacteroidia	Bacteroidales	Prevotellaceae	Prevotella	0.000235868	C70117_71_000000000C45C2_1_2110_13900_9578	0.000219085	9.52544e-06	0.000457221	0.000790612	2.85763e-05	0.000414357	0	0	0	0.000457221	0	0.00085729	0	0	0	5.71527e-05	0	0	0	0.00085729	0.000685832	0.000285763	0.00274333	0.00200034	0	0	0	0	0.000171458	0	0	0	0	0	0.00154312	0	0	0.000114305
Otu00447	Bacteria;Firmicutes;Clostridia;Clostridiales;Ruminococcaceae;unclassified_Ruminococcaceae	Firmicutes	Clostridia	Clostridiales	Ruminococcaceae	unclassified_Ruminococcaceae	0.000234054	C70117_71_000000000C45C2_1_2119_8899_7897	0.000342916	0.000142882	4.28645e-05	0.000228611	0.000457221	0.000514374	0.000171458	0.000342916	0.000171458	0.000171458	0.000457221	0.000742985	5.71527e-05	0.000114305	0.000114305	0.000342916	0.000114305	0.000114305	0	5.71527e-05	5.71527e-05	5.71527e-05	0	5.71527e-05	5.71527e-05	0.000228611	0.000342916	0.000685832	0.000171458	0.000114305	0.000514374	5.71527e-05	0.000342916	0.00154312	0.000228611	0.000914442	0.000628679	0.000285763
Otu00448	Bacteria;Firmicutes;Clostridia;Clostridiales;Peptococcaceae 1;Peptococcus	Firmicutes	Clostridia	Clostridiales	Peptococcaceae 1	Peptococcus	0.000233147	M06047_81_000000000CBLT5_1_1106_12848_9113	0.000152407	0.000419119	0.000128593	0.000152407	0.00054295	2.85763e-05	0.000114305	5.71527e-05	0.000400069	0.000228611	0	0.000114305	0.000514374	0.0010859	0.000400069	0.000285763	0.000114305	0.000114305	0	0	5.71527e-05	0.000457221	0.000628679	0	5.71527e-05	0.000114305	5.71527e-05	5.71527e-05	0.00154312	0.000114305	0	0.00131451	0.000114305	0.000171458	0	5.71527e-05	0	5.71527e-05
Otu00449	Bacteria;Bacteroidetes;Bacteroidia;Bacteroidales;Prevotellaceae;Paraprevotella	Bacteroidetes	Bacteroidia	Bacteroidales	Prevotellaceae	Paraprevotella	0.000229518	C70117_71_000000000C45C2_1_1111_26274_15447	0.000285763	0.000219085	0	0.000619154	0.000676306	0.000142882	0.00102875	0	5.71527e-05	0.000228611	0.000114305	0.000285763	0.000571527	5.71527e-05	0.000571527	0.000114305	0	0	0	0	0	0	0.000285763	0.00085729	0.000514374	0.000914442	0.000114305	0.00102875	0.000171458	0.00194319	0.00131451	0.000171458	0.000285763	0.000171458	0	0.000400069	0.000171458	0
Otu00450	Bacteria;Firmicutes;Clostridia;Clostridiales;Lachnospiraceae;unclassified_Lachnospiraceae	Firmicutes	Clostridia	Clostridiales	Lachnospiraceae	unclassified_Lachnospiraceae	0.000228611	C70117_71_000000000C45C2_1_2115_8384_6232	0.000152407	1.90509e-05	1.42882e-05	3.81018e-05	0.000123831	0.000100017	0.000228611	0.000285763	0	0	0.000114305	0.000285763	5.71527e-05	0	0	5.71527e-05	0	0	0	0	5.71527e-05	0	5.71527e-05	0	0	0.000114305	0	5.71527e-05	0	0	0.000171458	0	0.000400069	0.000171458	0	0.000171458	0.000228611	0
Otu00451	Bacteria;Firmicutes;Clostridia;Clostridiales;Lachnospiraceae;unclassified_Lachnospiraceae	Firmicutes	Clostridia	Clostridiales	Lachnospiraceae	unclassified_Lachnospiraceae	0.000228611	M06047_81_000000000CBLT5_1_1115_17860_4480	3.81018e-05	2.85763e-05	1.42882e-05	0.000171458	0.00132404	0.000900154	0	0.000114305	0	5.71527e-05	5.71527e-05	0	0	0	0	0	0	0.000171458	0	5.71527e-05	0	0	0	0	0	5.71527e-05	0.000914442	5.71527e-05	0	0	0.00085729	0	0.000114305	0.00697262	5.71527e-05	0.000114305	0.0032577	0.000171458
Otu00452	Bacteria;Firmicutes;Clostridia;Clostridiales;Ruminococcaceae;unclassified_Ruminococcaceae	Firmicutes	Clostridia	Clostridiales	Ruminococcaceae	unclassified_Ruminococcaceae	0.000228611	C70117_71_000000000C45C2_1_1114_4824_20399	9.52544e-05	0.00128593	7.14408e-05	0	9.52544e-06	0.00114305	0	0	5.71527e-05	0.000171458	5.71527e-05	0.000285763	5.71527e-05	0.000571527	0.00194319	0.00200034	0.00234326	0.000800137	0	0.000228611	0	5.71527e-05	0	0	0	0	0	0	5.71527e-05	0	0	0	0	0	0.00451506	5.71527e-05	0	0
Otu00453	Bacteria;Proteobacteria;Gammaproteobacteria;Pseudomonadales;Moraxellaceae;Moraxella	Proteobacteria	Gammaproteobacteria	Pseudomonadales	Moraxellaceae	Moraxella	0.000227703	M01394_160_000000000C9RJW_1_1102_16281_12378	0	0	0	0.00100017	0.000723934	4.28645e-05	0	0	0	0	0	0	0	0	0	0	0	0	0	0	0	0	0	0	0.00577242	0	0.000114305	0.000114305	0	0	0.000114305	0	5.71527e-05	0.00417214	0	0.000114305	5.71527e-05	0
Otu00454	Bacteria;Firmicutes;Clostridia;Clostridiales;Lachnospiraceae;unclassified_Lachnospiraceae	Firmicutes	Clostridia	Clostridiales	Lachnospiraceae	unclassified_Lachnospiraceae	0.000225889	M06047_81_000000000CBLT5_1_1117_18668_3466	7.62035e-05	0	0	0.000114305	0.000285763	0.000100017	0	0.000114305	0.000171458	0	5.71527e-05	0.000114305	0	0	0	0	0	0	0	0	0	0	0	0	5.71527e-05	0	0.000114305	0.000514374	0	0	0	0	0.00165743	5.71527e-05	5.71527e-05	0.000342916	0	0
Otu00455	Bacteria;Firmicutes;Clostridia;unclassified_Clostridia;;	Firmicutes	Clostridia	unclassified_Clostridia			0.000224982	M06047_81_000000000CBLT5_1_1109_13152_8769	0.000276238	0.000142882	2.85763e-05	0.000161933	0.00043817	0.000300051	0.000571527	0.000228611	0.000228611	0.000171458	0.000285763	0.000171458	0.000285763	5.71527e-05	0.000228611	0.000171458	5.71527e-05	5.71527e-05	0.000114305	0	0	0	5.71527e-05	0	0.000285763	0.000114305	0.000171458	0.000342916	0.000171458	5.71527e-05	0.000342916	0.000114305	0.000628679	0.00131451	0	0.000228611	0.000228611	0.000742985
Otu00456	Bacteria;Bacteroidetes;Bacteroidia;Bacteroidales;Rikenellaceae;Alistipes	Bacteroidetes	Bacteroidia	Bacteroidales	Rikenellaceae	Alistipes	0.000224982	M06047_81_000000000CBLT5_1_2110_11820_12966	0.000371492	0.000247662	0.000142882	0.000142882	0.000190509	0.000242899	0.000628679	0.000171458	0.000514374	5.71527e-05	0.000171458	0.000685832	0.000285763	0.000457221	0.000342916	5.71527e-05	0.000171458	0.000171458	0.000114305	0.000171458	0.000171458	0.000114305	0	5.71527e-05	0.000342916	5.71527e-05	0.000114305	0.000285763	0.000114305	0.000171458	0.000114305	0.000171458	0.000114305	0.000457221	0.000800137	0.000114305	0	5.71527e-05
Otu00457	Bacteria;Firmicutes;Clostridia;Clostridiales;Lachnospiraceae;unclassified_Lachnospiraceae	Firmicutes	Clostridia	Clostridiales	Lachnospiraceae	unclassified_Lachnospiraceae	0.000221353	M06047_81_000000000CBLT5_1_1109_26683_11746	9.52544e-05	0.000152407	0.000342916	0.000466747	0.000247662	7.14408e-05	0.000114305	0.000171458	0.000228611	5.71527e-05	0	0	0	0	0	0	0.000114305	0.000800137	0	0.000685832	0.000514374	0.000171458	5.71527e-05	5.71527e-05	0.000285763	0.00222895	5.71527e-05	0.000114305	5.71527e-05	5.71527e-05	0.000114305	0.00114305	0	0.000114305	0	0	0	0.000285763
Otu00458	Bacteria;Firmicutes;Clostridia;Clostridiales;Ruminococcaceae;Gemmiger	Firmicutes	Clostridia	Clostridiales	Ruminococcaceae	Gemmiger	0.000221353	M06047_81_000000000CBLT5_1_1113_23476_6965	0.000152407	6.66781e-05	0	0.000238136	0.000323865	0.00085729	0.000171458	0.000228611	0.000171458	0.000342916	0	0	0.000400069	0	0	0	0	0	0	0	0	0	0	5.71527e-05	0	0	0.00137166	0	0	0	0.000685832	0	0.000800137	0.000457221	0.000171458	0.00268617	0.000514374	5.71527e-05
Otu00459	Bacteria;Actinobacteria;Actinobacteria;Coriobacteriales;Coriobacteriaceae;unclassified_Coriobacteriaceae	Actinobacteria	Actinobacteria	Coriobacteriales	Coriobacteriaceae	unclassified_Coriobacteriaceae	0.000218632	M06047_81_000000000CBLT5_1_1119_16757_20320	0.000114305	0.000133356	0.000642967	0.000409594	0.000152407	2.85763e-05	0	0	0	0.000114305	0.000342916	0.000228611	5.71527e-05	0.000171458	5.71527e-05	0.000114305	5.71527e-05	0.000342916	0.000285763	0.00154312	0	0.000742985	0.00148597	0.00085729	5.71527e-05	5.71527e-05	0	0	0.000800137	0.000114305	0	0	0	0	0	0	0	0.000114305
Otu00460	Bacteria;unclassified_Bacteria;;;;	unclassified_Bacteria					0.000217724	C70117_71_000000000C45C2_1_2106_14575_16030	0.000247662	0.00033339	0.000557238	2.85763e-05	0.00020956	0.000185746	0	0.000114305	0.000342916	0.000342916	0.000285763	0.000400069	0.000742985	5.71527e-05	0.000114305	0.000342916	0.000400069	0.000342916	0.00125736	0.000514374	0	0.000457221	0	5.71527e-05	0	0.000114305	0	0	0.000457221	0.000457221	5.71527e-05	0.000285763	0	0	0.000742985	0	0	0
Otu00461	Bacteria;Firmicutes;Clostridia;Clostridiales;Lachnospiraceae;unclassified_Lachnospiraceae	Firmicutes	Clostridia	Clostridiales	Lachnospiraceae	unclassified_Lachnospiraceae	0.000216817	M06047_81_000000000CBLT5_1_1110_14588_4740	5.71527e-05	4.76272e-05	0	0.000352441	0.00102875	0.00101446	5.71527e-05	0.000228611	0	0	0	5.71527e-05	0.000171458	0.000114305	0	0	0	0	0	0	0	0	0	0	0	0	0.00188604	0.000228611	0	0	0.00251472	0	0.00342916	0.000228611	0	0.00354346	0.000514374	0
Otu00462	Bacteria;Firmicutes;Clostridia;Clostridiales;Lachnospiraceae;Clostridium XlVa	Firmicutes	Clostridia	Clostridiales	Lachnospiraceae	Clostridium XlVa	0.000216817	M06047_81_000000000CBLT5_1_2103_17315_18297	0.000180983	0.000133356	1.42882e-05	0.000943019	0.000133356	0.00031434	0.000114305	0.000571527	0	0	0.000400069	0	0.000171458	0.000171458	0.000114305	0.000285763	0	5.71527e-05	0	0	5.71527e-05	0	0.00160027	0.000457221	0	0.00262902	0.000228611	0.000742985	0.000114305	0.000114305	0	0	0.000457221	0.000114305	5.71527e-05	0.000628679	0.000342916	0.000228611
Otu00463	Bacteria;Firmicutes;Clostridia;Clostridiales;Lachnospiraceae;Roseburia	Firmicutes	Clostridia	Clostridiales	Lachnospiraceae	Roseburia	0.000215003	M03062_107_000000000CBKND_1_2111_18939_8974	0.000390543	0.000371492	0.000171458	0	0.000247662	0.000271475	0	0.00165743	0	0	0.000685832	0	0	0	0	0.000800137	0.00137166	5.71527e-05	0.000228611	0.000285763	0.000171458	0	0	0	0	0	0	0	0	0	0	0.00148597	0	0	0	0	0	0.0010859
Otu00464	Bacteria;Bacteroidetes;Bacteroidia;Bacteroidales;Porphyromonadaceae;unclassified_Porphyromonadaceae	Bacteroidetes	Bacteroidia	Bacteroidales	Porphyromonadaceae	unclassified_Porphyromonadaceae	0.000212281	C70117_71_000000000C45C2_1_1116_14652_18356	0.000171458	9.52544e-06	0.000185746	0.000828713	2.85763e-05	0.000142882	5.71527e-05	0.000171458	0	0	0	0.000800137	0	5.71527e-05	0	0	0	0	0.000342916	0	0.000342916	5.71527e-05	0	0	0.00331485	0.00160027	0	5.71527e-05	0	0.000114305	5.71527e-05	0	0	0	0	0	0.000571527	0
Otu00465	Bacteria;Firmicutes;Clostridia;Clostridiales;Ruminococcaceae;unclassified_Ruminococcaceae	Firmicutes	Clostridia	Clostridiales	Ruminococcaceae	unclassified_Ruminococcaceae	0.000211374	M06047_81_000000000CBLT5_1_1114_23337_13713	0.000180983	0.00010478	5.71527e-05	0.000133356	7.62035e-05	0.000471509	5.71527e-05	0.000228611	0	0	0.000342916	0.000457221	0.000285763	0	0.000114305	0	0.000114305	0.000114305	5.71527e-05	0.000114305	5.71527e-05	0	0	0	5.71527e-05	0.000228611	0.000400069	0.000114305	0	0.000171458	0.000171458	0	5.71527e-05	5.71527e-05	0.000171458	0.000171458	0.0010859	0.000457221
Otu00466	Bacteria;Firmicutes;Clostridia;Clostridiales;Lachnospiraceae;unclassified_Lachnospiraceae	Firmicutes	Clostridia	Clostridiales	Lachnospiraceae	unclassified_Lachnospiraceae	0.000211374	M06047_81_000000000CBLT5_1_1104_24897_10618	0.000219085	0.00010478	1.42882e-05	9.52544e-05	0.000381018	0.00031434	0.000114305	0.000228611	0.000114305	5.71527e-05	0.000514374	0.000285763	0.000171458	5.71527e-05	5.71527e-05	0.000228611	0.000114305	0	5.71527e-05	0	0	0	5.71527e-05	0	0	0	0.000457221	5.71527e-05	0	0	0.000742985	0	0.00154312	0	0	0.000228611	0.000971595	5.71527e-05
Otu00467	Bacteria;Firmicutes;Clostridia;Clostridiales;Ruminococcaceae;unclassified_Ruminococcaceae	Firmicutes	Clostridia	Clostridiales	Ruminococcaceae	unclassified_Ruminococcaceae	0.000210467	M06047_81_000000000CBLT5_1_2105_14524_19298	0.000400069	0.000133356	4.28645e-05	0.000142882	0.000247662	0.000614391	0.000914442	0.000685832	0.000114305	0.000171458	0.000285763	0.000228611	0.000171458	5.71527e-05	5.71527e-05	0.000400069	5.71527e-05	5.71527e-05	5.71527e-05	5.71527e-05	0	5.71527e-05	0.000228611	0	0.000114305	0.000171458	0.000171458	0.000171458	0.000171458	0.000400069	0	0	0.000228611	0.000685832	0.000342916	0.000800137	0.00120021	0.000114305
Otu00468	Bacteria;Firmicutes;Clostridia;Clostridiales;unclassified_Clostridiales;	Firmicutes	Clostridia	Clostridiales	unclassified_Clostridiales		0.000210467	M06047_81_000000000CBLT5_1_2115_5143_19109	3.81018e-05	0	1.42882e-05	2.85763e-05	6.66781e-05	0.000500086	0	0	0	0.000114305	0	0.000114305	0	0	0	0	0	0	5.71527e-05	0	0	0	5.71527e-05	0	0	0	0.000114305	0	0	0	0.000285763	0	0.000114305	0	0	0.000228611	0.00177173	0
Otu00469	Bacteria;Firmicutes;Clostridia;Clostridiales;Lachnospiraceae;Acetatifactor	Firmicutes	Clostridia	Clostridiales	Lachnospiraceae	Acetatifactor	0.00020956	M06047_81_000000000CBLT5_1_2107_9867_10527	0.000247662	9.52544e-05	0	0.000247662	0.000285763	0.000600103	0	0.000400069	0.000400069	0.000114305	0.000171458	0.000400069	0.000171458	0	5.71527e-05	5.71527e-05	0.000114305	0.000171458	0	0	0	0	0.000285763	0.000114305	0	0.000171458	0.000457221	0.000457221	0	0.000114305	0.000342916	5.71527e-05	0.000228611	0.000971595	5.71527e-05	0.000685832	0.00137166	0.000285763
Otu00470	Bacteria;Firmicutes;Clostridia;Clostridiales;Lachnospiraceae;unclassified_Lachnospiraceae	Firmicutes	Clostridia	Clostridiales	Lachnospiraceae	unclassified_Lachnospiraceae	0.00020956	M06047_81_000000000CBLT5_1_1108_27580_14420	0.000419119	7.62035e-05	7.14408e-05	0.000200034	0.000295289	0.00101446	0	0.00240041	0	0	0.000114305	0	0.000228611	5.71527e-05	0	0.000114305	0	5.71527e-05	0	0	0.000285763	0	0.000114305	0.000114305	5.71527e-05	0.000228611	0.000285763	0.000400069	0	5.71527e-05	0.000285763	0.000114305	0.000228611	0.0010859	0	0.000571527	0.00308624	0.000400069
Otu00471	Bacteria;Firmicutes;Clostridia;Clostridiales;Ruminococcaceae;unclassified_Ruminococcaceae	Firmicutes	Clostridia	Clostridiales	Ruminococcaceae	unclassified_Ruminococcaceae	0.00020956	M06047_81_000000000CBLT5_1_2110_13653_20901	1.90509e-05	6.66781e-05	5.71527e-05	0.00020956	0.00010478	0.000200034	0	5.71527e-05	0	0	0	5.71527e-05	0.000114305	5.71527e-05	0.000171458	5.71527e-05	0	0	0.000114305	0.000114305	0	0	5.71527e-05	0	0.000285763	0.000342916	0.000114305	0.000457221	0	0.000400069	5.71527e-05	5.71527e-05	0	0.000114305	0.000685832	5.71527e-05	5.71527e-05	0
Otu00472	Bacteria;Firmicutes;unclassified_Firmicutes;;;	Firmicutes	unclassified_Firmicutes				0.000208653	M06047_81_000000000CBLT5_1_2108_9198_7245	0.000819188	9.52544e-06	2.85763e-05	9.52544e-06	0	0.000114305	0	0.00485798	0	0	5.71527e-05	0	0	0	0	0	0	5.71527e-05	0	5.71527e-05	0	5.71527e-05	0	0	5.71527e-05	0	0	0	0	0	0	0	0	0	0.000457221	0	0	0
Otu00473	Bacteria;Firmicutes;Bacilli;Lactobacillales;Streptococcaceae;Streptococcus	Firmicutes	Bacilli	Lactobacillales	Streptococcaceae	Streptococcus	0.000208653	M03062_107_000000000CBKND_1_2101_25611_18139	0.000161933	0.000219085	0.000200034	9.52544e-06	0.000219085	0.000257187	0	0.000685832	0	0	0.000285763	0	0	0	0	0	0.00131451	0	0	0.000742985	5.71527e-05	0	0	0	0	0	0	5.71527e-05	0	0	0	0.00131451	0	0	0	0.000228611	0	0.000800137
Otu00474	Bacteria;Firmicutes;Clostridia;Clostridiales;Ruminococcaceae;unclassified_Ruminococcaceae	Firmicutes	Clostridia	Clostridiales	Ruminococcaceae	unclassified_Ruminococcaceae	0.000205931	M06047_81_000000000CBLT5_1_1117_24360_5630	0.000180983	9.52544e-05	5.71527e-05	0.000400069	0.00033339	0.000171458	0.000400069	0.000114305	5.71527e-05	0.000228611	0.000114305	0.000171458	0.000285763	5.71527e-05	0.000114305	0	5.71527e-05	5.71527e-05	0	0	0	0.000228611	0.000228611	0.000400069	0.000114305	0.00142882	0.000114305	0.000114305	0.000342916	0.000400069	0.000228611	0.000171458	0.000742985	0.000114305	0	0.000400069	0.000114305	0.000171458
Otu00475	Bacteria;Firmicutes;Clostridia;Clostridiales;unclassified_Clostridiales;	Firmicutes	Clostridia	Clostridiales	unclassified_Clostridiales		0.000204117	C70117_71_000000000C45C2_1_1106_7006_22221	0.00010478	0.000523899	0.00038578	1.90509e-05	0.000762035	8.5729e-05	0	5.71527e-05	0.000114305	0.000342916	0.000114305	0	0	0	0.000228611	0.000171458	0.00131451	0.00142882	0.0010859	0	0	0.000457221	0	0	0	5.71527e-05	5.71527e-05	0	0.00251472	0.00102875	0	0.00102875	0	0	0.000285763	0	0	5.71527e-05
Otu00476	Bacteria;Firmicutes;Clostridia;Clostridiales;Lachnospiraceae;unclassified_Lachnospiraceae	Firmicutes	Clostridia	Clostridiales	Lachnospiraceae	unclassified_Lachnospiraceae	0.000203209	M06047_81_000000000CBLT5_1_1105_15419_15201	0.000190509	9.52544e-06	2.85763e-05	1.90509e-05	0.000247662	0.00141453	0	0.000914442	0	0	0.000228611	0	0	0	0	0	5.71527e-05	0	5.71527e-05	5.71527e-05	0	0	0	0	0	0	0.000114305	0	0	0	0.000171458	5.71527e-05	0.000114305	0.00114305	0	0.000171458	0.00548665	0
Otu00477	Bacteria;Firmicutes;Clostridia;Clostridiales;Lachnospiraceae;unclassified_Lachnospiraceae	Firmicutes	Clostridia	Clostridiales	Lachnospiraceae	unclassified_Lachnospiraceae	0.000203209	M06047_81_000000000CBLT5_1_2101_23743_19345	0.000390543	3.81018e-05	1.42882e-05	0.000171458	0.000266712	0.000428645	0.000171458	0.000514374	0.000400069	0.000171458	0.000971595	0.000114305	0	0	0	5.71527e-05	0.000114305	5.71527e-05	0	0	5.71527e-05	0	0.000285763	0.000228611	0	0.000114305	0.000171458	0.000228611	0	0	5.71527e-05	0.000228611	0.000628679	0.000685832	0.000114305	0.000285763	0.00125736	5.71527e-05
Otu00478	Bacteria;Firmicutes;unclassified_Firmicutes;;;	Firmicutes	unclassified_Firmicutes				0.000203209	M06047_81_000000000CBLT5_1_2114_20500_6113	7.62035e-05	0.00031434	0.000114305	0	0	1.42882e-05	0	5.71527e-05	0	0	0.000114305	0.000285763	0.0010859	0.000400069	5.71527e-05	0.000228611	0	0.000114305	0.000400069	5.71527e-05	0	0	0	0	0	0	0	0	0	0	0	0	0	0	5.71527e-05	0	0	0
Otu00479	Bacteria;Firmicutes;Clostridia;Clostridiales;Lachnospiraceae;unclassified_Lachnospiraceae	Firmicutes	Clostridia	Clostridiales	Lachnospiraceae	unclassified_Lachnospiraceae	0.000203209	M06047_81_000000000CBLT5_1_1112_25604_16890	4.76272e-05	2.85763e-05	0	0.000571527	0.000342916	0.00101446	0	0.000228611	5.71527e-05	0	0	0	5.71527e-05	0	0	5.71527e-05	0	5.71527e-05	0	0	0	0	0	5.71527e-05	0	0	0.00331485	5.71527e-05	0	0	0.0010859	0	0.000228611	0.000742985	0	0.00302909	0.00102875	0
Otu00480	Bacteria;Bacteroidetes;Bacteroidia;Bacteroidales;Porphyromonadaceae;Barnesiella	Bacteroidetes	Bacteroidia	Bacteroidales	Porphyromonadaceae	Barnesiella	0.000203209	C70117_71_000000000C45C2_1_2119_9963_8026	0.000609628	0.000390543	0.000171458	0.000666781	4.76272e-05	5.71527e-05	0	0	0	0.000342916	0	0.00331485	0	0.00234326	0	0	0	0	0	0.000228611	5.71527e-05	0.000400069	0.00171458	0.00228611	0	0	0	0	0.000285763	0	0	0	0	0	5.71527e-05	0	0	0.000171458
Otu00481	Bacteria;Firmicutes;Clostridia;Clostridiales;Lachnospiraceae;Acetatifactor	Firmicutes	Clostridia	Clostridiales	Lachnospiraceae	Acetatifactor	0.000202302	M06047_81_000000000CBLT5_1_2110_6344_19166	0.000123831	4.76272e-05	4.28645e-05	0.000609628	6.66781e-05	0.000114305	0	0.000285763	0	0	0.000400069	5.71527e-05	0	5.71527e-05	0.000114305	0	0	0.000114305	0	5.71527e-05	0	0.000114305	5.71527e-05	0	0.000457221	0	5.71527e-05	0.00308624	5.71527e-05	0	0.000171458	5.71527e-05	0.000114305	0	0.000457221	0	0	0
Otu00482	Bacteria;Actinobacteria;Actinobacteria;Coriobacteriales;Coriobacteriaceae;unclassified_Coriobacteriaceae	Actinobacteria	Actinobacteria	Coriobacteriales	Coriobacteriaceae	unclassified_Coriobacteriaceae	0.000201395	C70117_71_000000000C45C2_1_1114_9336_23256	0.000371492	0.00010478	0.000843002	0.000190509	1.90509e-05	5.71527e-05	0.000628679	0.000457221	0.000114305	0.000114305	0.000114305	0.000800137	0.000342916	5.71527e-05	0	0.000114305	5.71527e-05	5.71527e-05	0.000400069	0.00245756	5.71527e-05	0.000457221	5.71527e-05	0.000285763	0	0.000800137	0	0	0	5.71527e-05	0	0	5.71527e-05	0	0.000114305	0	0	0.000114305
Otu00483	Bacteria;unclassified_Bacteria;;;;	unclassified_Bacteria					0.000201395	M06047_81_000000000CBLT5_1_1117_7975_20335	0.000171458	0.000161933	0.000214322	0.000142882	0.000266712	0.000300051	0.000114305	5.71527e-05	0.000228611	0.000114305	0.000114305	0.000400069	5.71527e-05	0	0.000514374	5.71527e-05	0.000228611	0.000114305	0.000285763	0	0	0.000571527	0	0	0	5.71527e-05	0.000800137	0	5.71527e-05	0.000114305	0.000800137	0.000400069	0	0.000228611	0.000457221	0.000685832	5.71527e-05	0
Otu00484	Bacteria;Deferribacteres;Deferribacteres;Deferribacterales;Deferribacteraceae;Mucispirillum	Deferribacteres	Deferribacteres	Deferribacterales	Deferribacteraceae	Mucispirillum	0.000200488	M06047_81_000000000CBLT5_1_2107_11185_10917	0.000885866	5.71527e-05	4.28645e-05	6.66781e-05	9.52544e-05	0.000428645	0	5.71527e-05	0.00417214	5.71527e-05	0.00085729	0.000171458	0.000171458	0.000114305	0	0	0	5.71527e-05	0.000114305	0	0	5.71527e-05	0	0.000114305	0	0.000228611	0	5.71527e-05	0	0.000171458	5.71527e-05	0	5.71527e-05	0.000285763	0.000628679	0.000285763	0.000342916	0.000457221
Otu00485	Bacteria;Proteobacteria;Alphaproteobacteria;Rhodospirillales;unclassified_Rhodospirillales;	Proteobacteria	Alphaproteobacteria	Rhodospirillales	unclassified_Rhodospirillales		0.000199581	M03062_107_000000000CBKND_1_2116_21065_17383	9.52544e-06	2.85763e-05	5.71527e-05	0.000171458	1.90509e-05	0.000257187	0	0	0	5.71527e-05	0	0	0	0	0	0	0	0.000171458	5.71527e-05	5.71527e-05	0	0.000114305	0	0	5.71527e-05	0.000285763	0.000171458	0.000514374	0	0	5.71527e-05	0	0	5.71527e-05	5.71527e-05	5.71527e-05	0.000914442	0
Otu00486	Bacteria;Bacteroidetes;Bacteroidia;Bacteroidales;Porphyromonadaceae;unclassified_Porphyromonadaceae	Bacteroidetes	Bacteroidia	Bacteroidales	Porphyromonadaceae	unclassified_Porphyromonadaceae	0.000198674	M03062_107_000000000CBKND_1_1112_15158_17753	0.000504848	0.000409594	2.85763e-05	0.00010478	1.90509e-05	4.28645e-05	0.000114305	0.00120021	0.000800137	0.00085729	5.71527e-05	0	0	0.000400069	0.000228611	0.000114305	0.00154312	0.000171458	0	0.000114305	0	0	0	5.71527e-05	0	0.000571527	0	0	0	5.71527e-05	0	0	5.71527e-05	0	0.000171458	0	0	0
Otu00487	Bacteria;Firmicutes;Clostridia;Clostridiales;Lachnospiraceae;unclassified_Lachnospiraceae	Firmicutes	Clostridia	Clostridiales	Lachnospiraceae	unclassified_Lachnospiraceae	0.000195952	M06047_81_000000000CBLT5_1_2112_11296_19590	0.000200034	4.76272e-05	1.42882e-05	0.000390543	0.000304814	0.000971595	0	0	0.00085729	0.000342916	0	0	5.71527e-05	0.000114305	0	0.000114305	0	0	0	0	5.71527e-05	0	0.000114305	0.000114305	0.000114305	0	0.00177173	0.000228611	0	0.000228611	0.00148597	0	0	0.000114305	0	0.00360062	0.000285763	0
Otu00488	Bacteria;Firmicutes;Clostridia;Clostridiales;Lachnospiraceae;unclassified_Lachnospiraceae	Firmicutes	Clostridia	Clostridiales	Lachnospiraceae	unclassified_Lachnospiraceae	0.000195952	M06047_81_000000000CBLT5_1_1117_25547_6402	5.71527e-05	0.00010478	2.85763e-05	0.000657256	0.000400069	0.000985883	0.000171458	5.71527e-05	5.71527e-05	0	5.71527e-05	0	0.000228611	5.71527e-05	0.000285763	5.71527e-05	0	0	0.000114305	0	0	0	0.00211465	0.000571527	0.000171458	5.71527e-05	0.00085729	0.000171458	0	0.000228611	0.000685832	5.71527e-05	0.000457221	0.000971595	0.000171458	0.00120021	0.000228611	0.00234326
Otu00489	Bacteria;Firmicutes;Clostridia;Clostridiales;Ruminococcaceae;unclassified_Ruminococcaceae	Firmicutes	Clostridia	Clostridiales	Ruminococcaceae	unclassified_Ruminococcaceae	0.000195952	M06047_81_000000000CBLT5_1_2112_6247_10498	0.00010478	0.000390543	0.000485798	0.000133356	0.000228611	0.000100017	0.000114305	0	0.000171458	0.000114305	0.000228611	0	5.71527e-05	0.000228611	0.000228611	0.000114305	0.00114305	0.000571527	0.000114305	0.00131451	0.000114305	0.000400069	0	0	0.000228611	0.000285763	0	0.000285763	0.000514374	0.000114305	5.71527e-05	0.000685832	0	0	0.000171458	0	0	0.000228611
Otu00490	Bacteria;Bacteroidetes;Bacteroidia;Bacteroidales;Prevotellaceae;Prevotella	Bacteroidetes	Bacteroidia	Bacteroidales	Prevotellaceae	Prevotella	0.000195045	M03062_107_000000000CBKND_1_1109_9788_3837	0.00043817	4.76272e-05	0.000771561	0	1.90509e-05	4.28645e-05	0	0.000285763	0	0	0.00234326	0	0	0	0	0	0.000285763	0	0	0.00302909	0	5.71527e-05	0	0	0	0	0	0	0	0	0	0.000114305	0	0	5.71527e-05	0	0	0.000114305
Otu00491	Bacteria;Firmicutes;Clostridia;Clostridiales;Lachnospiraceae;unclassified_Lachnospiraceae	Firmicutes	Clostridia	Clostridiales	Lachnospiraceae	unclassified_Lachnospiraceae	0.000194138	M01394_160_000000000C9RJW_1_2109_24829_13732	4.76272e-05	0	0	0.00142882	0.000133356	7.14408e-05	5.71527e-05	0	0	5.71527e-05	0.000114305	5.71527e-05	0	0	0	0	0	0	0	0	0	0	0	0	0.000228611	0.00817283	0.000114305	5.71527e-05	0	0	0	0.000514374	5.71527e-05	0.000228611	0	0.000114305	0.000171458	0
Otu00492	Bacteria;unclassified_Bacteria;;;;	unclassified_Bacteria					0.00019323	M06047_81_000000000CBLT5_1_2105_6905_11003	3.81018e-05	0.000142882	0	1.90509e-05	1.90509e-05	4.28645e-05	0	0.000114305	0	0	0	0.000114305	0.000742985	0	0	0	5.71527e-05	5.71527e-05	0	0	0	0	5.71527e-05	0	0	0	5.71527e-05	0	0	5.71527e-05	0	0	5.71527e-05	0	0	0.000114305	5.71527e-05	0
Otu00493	Bacteria;Proteobacteria;Deltaproteobacteria;Desulfovibrionales;Desulfovibrionaceae;unclassified_Desulfovibrionaceae	Proteobacteria	Deltaproteobacteria	Desulfovibrionales	Desulfovibrionaceae	unclassified_Desulfovibrionaceae	0.00019323	C70117_71_000000000C45C2_1_1116_17524_3814	0.000609628	0.000733459	0.000142882	9.52544e-05	0.000180983	0.000128593	0.00262902	0	0.000571527	0.000228611	0.000171458	5.71527e-05	0.00114305	0.00240041	0.000342916	0.000342916	0.000114305	5.71527e-05	0.000342916	0	0.000114305	0.000114305	5.71527e-05	0	0.000342916	5.71527e-05	0.000114305	0	0	0.000285763	0.000285763	0	0.000285763	0.000228611	5.71527e-05	0.000342916	0.000114305	0
Otu00494	Bacteria;Firmicutes;Clostridia;Clostridiales;Lachnospiraceae;unclassified_Lachnospiraceae	Firmicutes	Clostridia	Clostridiales	Lachnospiraceae	unclassified_Lachnospiraceae	0.000191416	M06047_81_000000000CBLT5_1_2110_13707_23718	0.000714408	3.81018e-05	8.5729e-05	1.90509e-05	9.52544e-06	1.42882e-05	0	0	0	5.71527e-05	0.000914442	0.00331485	0	0.000114305	5.71527e-05	0	5.71527e-05	0	0	0	5.71527e-05	0.000285763	0	0	0.000114305	0	0	0	5.71527e-05	0	0	0	0	0	0	0	5.71527e-05	0
Otu00495	Bacteria;Firmicutes;Clostridia;Clostridiales;Ruminococcaceae;unclassified_Ruminococcaceae	Firmicutes	Clostridia	Clostridiales	Ruminococcaceae	unclassified_Ruminococcaceae	0.000191416	M06047_81_000000000CBLT5_1_1102_19119_16062	7.62035e-05	8.5729e-05	0	0.000304814	0.000590577	0.000500086	5.71527e-05	0.000114305	0	0	5.71527e-05	0.000228611	0.000457221	0	0	0	0	5.71527e-05	0	0	0	0	5.71527e-05	0	5.71527e-05	0	0.00114305	0.000571527	0	0	0.0020575	0	0.00142882	5.71527e-05	0	0.00171458	0.000285763	0
Otu00496	Bacteria;unclassified_Bacteria;;;;	unclassified_Bacteria					0.000191416	M06047_81_000000000CBLT5_1_2107_21315_21952	0.000247662	0.000266712	0.000214322	2.85763e-05	5.71527e-05	0.000100017	0.000800137	0.000114305	5.71527e-05	5.71527e-05	0	0.000457221	5.71527e-05	0.000800137	0.000114305	0.000171458	0.000400069	5.71527e-05	0.000285763	0	5.71527e-05	0.000514374	5.71527e-05	0	0	0	5.71527e-05	5.71527e-05	0	0.000228611	0	0	0	0.000114305	0.000285763	0	5.71527e-05	5.71527e-05
Otu00497	Bacteria;Bacteroidetes;Bacteroidia;Bacteroidales;unclassified_Bacteroidales;	Bacteroidetes	Bacteroidia	Bacteroidales	unclassified_Bacteroidales		0.000191416	M06047_81_000000000CBLT5_1_2114_6679_19960	0.000695357	0.000771561	1.42882e-05	0.000123831	7.62035e-05	1.42882e-05	5.71527e-05	0.0010859	5.71527e-05	0.000114305	0.000914442	0.00194319	0.000457221	0.000628679	0.000571527	0.00120021	0.000400069	0.00137166	0	5.71527e-05	0	0	0.000285763	0.000228611	0	0.000228611	0	0	0.000114305	0.000114305	0	0.000228611	0	0	5.71527e-05	0	0	0
Otu00498	Bacteria;Fusobacteria;Fusobacteriia;Fusobacteriales;Fusobacteriaceae;Fusobacterium	Fusobacteria	Fusobacteriia	Fusobacteriales	Fusobacteriaceae	Fusobacterium	0.000189602	M03062_107_000000000CBKND_1_2114_18832_17168	0.000219085	0.000514374	0.000114305	0	0.000257187	0.00015717	0	0.0010859	0	0	0.000228611	0	0	0	0	0	0.00308624	0	0	0.000457221	0	0	0	0	0	0	0	0	0	0	5.71527e-05	0.00142882	0	5.71527e-05	0	0	0	0.000628679
Otu00499	Bacteria;Actinobacteria;Actinobacteria;Coriobacteriales;Coriobacteriaceae;unclassified_Coriobacteriaceae	Actinobacteria	Actinobacteria	Coriobacteriales	Coriobacteriaceae	unclassified_Coriobacteriaceae	0.000189602	M06047_81_000000000CBLT5_1_2112_8013_23410	0.000447696	5.71527e-05	2.85763e-05	0.000238136	4.76272e-05	0	5.71527e-05	0.00102875	5.71527e-05	0.000171458	0.000514374	0.00085729	0.000285763	0	0	0	5.71527e-05	0	5.71527e-05	0	0	5.71527e-05	0	5.71527e-05	5.71527e-05	0.00120021	0	0.000114305	0	0.000114305	0	5.71527e-05	5.71527e-05	5.71527e-05	0	0	0	0
Otu00500	Bacteria;Proteobacteria;Gammaproteobacteria;Pseudomonadales;Pseudomonadaceae;unclassified_Pseudomonadaceae	Proteobacteria	Gammaproteobacteria	Pseudomonadales	Pseudomonadaceae	unclassified_Pseudomonadaceae	0.000188694	M03062_118_000000000CKCW4_1_2107_19983_14484	0	0	0	0	0	0	0	0	0	0	0	0	0	0	0	0	0	0	0	0	0	0	0	0	0	0	0	0	0	0	0	0	0	0	0	0	0	0
Otu00501	Bacteria;Firmicutes;Clostridia;Clostridiales;Lachnospiraceae;unclassified_Lachnospiraceae	Firmicutes	Clostridia	Clostridiales	Lachnospiraceae	unclassified_Lachnospiraceae	0.000187787	C70117_71_000000000C45C2_1_2102_23644_16773	9.52544e-06	0.000619154	0.00085729	8.5729e-05	0.00031434	5.71527e-05	0	0	0	0	0	5.71527e-05	5.71527e-05	0.000171458	0	0.000114305	0.00268617	0.000685832	0	0.00148597	0.000171458	0.00177173	5.71527e-05	0.000400069	0	0	0	5.71527e-05	0	0	0	5.71527e-05	5.71527e-05	0.00177173	0.000171458	0	5.71527e-05	0
Otu00502	Bacteria;Bacteroidetes;Bacteroidia;Bacteroidales;Porphyromonadaceae;unclassified_Porphyromonadaceae	Bacteroidetes	Bacteroidia	Bacteroidales	Porphyromonadaceae	unclassified_Porphyromonadaceae	0.00018688	M06047_81_000000000CBLT5_1_1101_4224_12246	0.00010478	0.000285763	0.000100017	0.00064773	0.000114305	0.000185746	0.000114305	0.000228611	0.000228611	0	5.71527e-05	0	0.000285763	0.000342916	0.000285763	0.000400069	0.000285763	0.000114305	5.71527e-05	5.71527e-05	5.71527e-05	0.000228611	0	0	0.000285763	0.0032577	5.71527e-05	0.000285763	0	0.000228611	0	0.000342916	0	0.000114305	0.000514374	5.71527e-05	0	0.000171458
Otu00503	Bacteria;Firmicutes;Clostridia;Clostridiales;Lachnospiraceae;unclassified_Lachnospiraceae	Firmicutes	Clostridia	Clostridiales	Lachnospiraceae	unclassified_Lachnospiraceae	0.00018688	M06047_81_000000000CBLT5_1_1116_13585_12569	0.000304814	0.000142882	5.71527e-05	0.00020956	0.000457221	0.000528662	0.000171458	0.000800137	0.000228611	0	0.000514374	0.000114305	0.000228611	0.000228611	0.000114305	0.000171458	0	0.000114305	0.000114305	0	0.000114305	0	0.000114305	0.000171458	0	0.000114305	0.000685832	0.000171458	0.000114305	0.000171458	0.000342916	0	0.00177173	0.000342916	5.71527e-05	0.000971595	0.00102875	5.71527e-05
Otu00504	Bacteria;Bacteroidetes;Bacteroidia;Bacteroidales;Porphyromonadaceae;Parabacteroides	Bacteroidetes	Bacteroidia	Bacteroidales	Porphyromonadaceae	Parabacteroides	0.000185973	C70117_71_000000000C45C2_1_2109_6778_17497	0.000276238	0	1.42882e-05	0.000714408	5.71527e-05	7.14408e-05	0	0.000457221	0.000171458	0.000400069	0.000171458	0.000457221	0	0	0	0	0	0	5.71527e-05	0	0	0	0.00171458	0.00154312	0.000285763	0.000514374	0.000114305	0.000114305	0	0	5.71527e-05	0	0	0.000285763	0	0.000114305	0	0.000171458
Otu00505	Bacteria;Proteobacteria;Gammaproteobacteria;Pasteurellales;Pasteurellaceae;unclassified_Pasteurellaceae	Proteobacteria	Gammaproteobacteria	Pasteurellales	Pasteurellaceae	unclassified_Pasteurellaceae	0.000185973	M06047_81_000000000CBLT5_1_1102_16489_13252	0.000180983	9.52544e-06	0.000128593	0.000590577	9.52544e-06	8.5729e-05	0.000400069	5.71527e-05	0.000457221	5.71527e-05	0.000114305	0	0	0	0	5.71527e-05	0	0	0	0.000114305	0.000400069	0	0.00102875	0.00228611	5.71527e-05	0.000114305	5.71527e-05	0	0	0	0	0	5.71527e-05	0	0	5.71527e-05	0.000171458	0.000114305
Otu00506	Bacteria;Firmicutes;Erysipelotrichia;Erysipelotrichales;Erysipelotrichaceae;Erysipelotrichaceae_incertae_sedis	Firmicutes	Erysipelotrichia	Erysipelotrichales	Erysipelotrichaceae	Erysipelotrichaceae_incertae_sedis	0.000184159	C70117_71_000000000C45C2_1_2107_11759_8797	9.52544e-06	0.000390543	0.00162885	3.81018e-05	0.000123831	7.14408e-05	0	5.71527e-05	0	0	0	0	0	0	5.71527e-05	0	0	0.00228611	0.00211465	0.0042293	0.000114305	5.71527e-05	0	0	5.71527e-05	0	0.000171458	0	0	0	0.000228611	5.71527e-05	0.000114305	0.000342916	5.71527e-05	0.000114305	0.000114305	0
Otu00507	Bacteria;Firmicutes;Clostridia;Clostridiales;Ruminococcaceae;unclassified_Ruminococcaceae	Firmicutes	Clostridia	Clostridiales	Ruminococcaceae	unclassified_Ruminococcaceae	0.000184159	C70117_71_000000000C45C2_1_2102_17271_20967	0.000276238	6.66781e-05	1.42882e-05	0.000180983	0.000171458	0.000300051	0	0.000285763	0.000171458	5.71527e-05	0.000342916	0.000800137	5.71527e-05	0.000114305	0	0.000171458	0	5.71527e-05	5.71527e-05	0	0	0	0	0	0.000114305	0.000228611	0.000114305	0.000628679	0	5.71527e-05	0.000114305	0	0.000114305	0.000742985	5.71527e-05	0.000457221	0.000228611	0.000457221
Otu00508	Bacteria;Firmicutes;Clostridia;Clostridiales;unclassified_Clostridiales;	Firmicutes	Clostridia	Clostridiales	unclassified_Clostridiales		0.000183251	M06047_81_000000000CBLT5_1_2106_18103_14899	0.000514374	0.000133356	2.85763e-05	0.000238136	0.000381018	0.000128593	0.00085729	0.00085729	5.71527e-05	0	0.00120021	0.000114305	0.000514374	0	5.71527e-05	5.71527e-05	0.000171458	0	0	5.71527e-05	5.71527e-05	0	5.71527e-05	0	0	0.000228611	0.00114305	0	0	0.00102875	0.00120021	5.71527e-05	0	0	0.000171458	0.000285763	5.71527e-05	0
Otu00509	Bacteria;Firmicutes;unclassified_Firmicutes;;;	Firmicutes	unclassified_Firmicutes				0.000183251	C70117_71_000000000C45C2_1_1101_22805_17842	0	0	1.42882e-05	2.85763e-05	3.81018e-05	0.00015717	0	0	0	0	0	0	0	0	0	0	0	0	0	0	5.71527e-05	0	0	0	0.000114305	0	5.71527e-05	0	0	0	5.71527e-05	0	0	0.000171458	0	0.000628679	0	0
Otu00510	Bacteria;Firmicutes;Clostridia;Clostridiales;Ruminococcaceae;unclassified_Ruminococcaceae	Firmicutes	Clostridia	Clostridiales	Ruminococcaceae	unclassified_Ruminococcaceae	0.000183251	C70117_71_000000000C45C2_1_1108_17644_19331	0.000161933	0.000238136	0.000342916	3.81018e-05	0.00010478	0	0	0.000285763	0	0.000114305	0.000171458	0.000400069	0.000342916	5.71527e-05	0.000228611	0.000628679	5.71527e-05	0.000114305	0	0.000685832	0	0.000685832	0	5.71527e-05	5.71527e-05	5.71527e-05	0	5.71527e-05	0	5.71527e-05	0	0	0.000457221	0.000114305	0	0	0	0
Otu00511	Bacteria;Firmicutes;Clostridia;Clostridiales;Eubacteriaceae;Anaerofustis	Firmicutes	Clostridia	Clostridiales	Eubacteriaceae	Anaerofustis	0.000183251	C70117_71_000000000C45C2_1_2108_15205_15162	0.000142882	0.000123831	2.85763e-05	5.71527e-05	6.66781e-05	0.000142882	0.000114305	5.71527e-05	0.000228611	0	0.000285763	0.000171458	5.71527e-05	0.000228611	5.71527e-05	0.000114305	0.000171458	0.000114305	5.71527e-05	0	0	5.71527e-05	0	0	5.71527e-05	0.000171458	0.000114305	0	5.71527e-05	5.71527e-05	5.71527e-05	0.000171458	0	5.71527e-05	0.000171458	0	0.000342916	5.71527e-05
Otu00512	Bacteria;Firmicutes;Clostridia;Clostridiales;Lachnospiraceae;unclassified_Lachnospiraceae	Firmicutes	Clostridia	Clostridiales	Lachnospiraceae	unclassified_Lachnospiraceae	0.000183251	M06047_81_000000000CBLT5_1_2116_25429_5217	1.90509e-05	0	0	3.81018e-05	0.000771561	0.000943019	5.71527e-05	0	0	0	5.71527e-05	0	0	0	0	0	0	0	0	0	0	0	0	0	5.71527e-05	0	5.71527e-05	0.000114305	0	0	5.71527e-05	0	0.000228611	0.0043436	0	0.000171458	0.00360062	0
Otu00513	Bacteria;Firmicutes;Clostridia;unclassified_Clostridia;;	Firmicutes	Clostridia	unclassified_Clostridia			0.000182344	M06047_81_000000000CBLT5_1_2104_13674_13838	0.000247662	5.71527e-05	2.85763e-05	0.000133356	0.000152407	0.000228611	0.000171458	0.000114305	0.000742985	0.000171458	0.000114305	0.000171458	0.000285763	5.71527e-05	0	0	0	0	5.71527e-05	0	5.71527e-05	0	5.71527e-05	0.000114305	0.000342916	0	5.71527e-05	0.000228611	5.71527e-05	0	5.71527e-05	0	5.71527e-05	0.000742985	0	0.000285763	0.000228611	0.000400069
Otu00514	Bacteria;Firmicutes;Clostridia;Clostridiales;Lachnospiraceae;unclassified_Lachnospiraceae	Firmicutes	Clostridia	Clostridiales	Lachnospiraceae	unclassified_Lachnospiraceae	0.000182344	M06047_81_000000000CBLT5_1_2108_19439_5419	9.52544e-05	7.62035e-05	0	0.000123831	4.76272e-05	2.85763e-05	0	0.000285763	0	0	0.000171458	0.000114305	0.000285763	0	5.71527e-05	5.71527e-05	0	5.71527e-05	0	0	0	0	0	0	0.000171458	0	0.000514374	5.71527e-05	0	0	0.000114305	0	0.000114305	5.71527e-05	0	5.71527e-05	0	5.71527e-05
Otu00515	Bacteria;Firmicutes;Erysipelotrichia;Erysipelotrichales;Erysipelotrichaceae;unclassified_Erysipelotrichaceae	Firmicutes	Erysipelotrichia	Erysipelotrichales	Erysipelotrichaceae	unclassified_Erysipelotrichaceae	0.00018053	M03062_107_000000000CBKND_1_2104_7519_6266	5.71527e-05	0.00119068	0.00031434	0	0.000133356	0.000128593	0.000228611	0	0	0	0.000114305	0	0.000685832	0.000685832	0.00177173	0.00400069	0	0	0.000400069	0.000342916	0.000114305	0.000400069	0	0	0	0	0	0	0.000171458	0.000571527	5.71527e-05	0	0	0	0.000342916	5.71527e-05	5.71527e-05	5.71527e-05
Otu00516	Bacteria;Firmicutes;Clostridia;Clostridiales;unclassified_Clostridiales;	Firmicutes	Clostridia	Clostridiales	unclassified_Clostridiales		0.00018053	M06047_81_000000000CBLT5_1_2110_18681_2833	1.90509e-05	0.00033339	0.000242899	9.52544e-06	0	1.42882e-05	0	0	0	0	0	0.000114305	5.71527e-05	0.00131451	0.000228611	0.000400069	0	0	0.000971595	0	0	0	0	0	0	0	5.71527e-05	0	0	0	0	0	0	0	0	0	0	5.71527e-05
Otu00517	Bacteria;unclassified_Bacteria;;;;	unclassified_Bacteria					0.00018053	M06047_81_000000000CBLT5_1_1119_18907_8247	0.000257187	9.52544e-05	8.5729e-05	0.00010478	0.000171458	0.000185746	0	0	0	0.000228611	0.000400069	0.000914442	0.000342916	0.000114305	0	0.000114305	0	0	0.000285763	0	0	5.71527e-05	0	0	0	0	0	0.000628679	0	0.000628679	0.000228611	0	0	0.000171458	0.000342916	0.000114305	0.000285763	0
Otu00518	Bacteria;Firmicutes;Clostridia;Clostridiales;Ruminococcaceae;unclassified_Ruminococcaceae	Firmicutes	Clostridia	Clostridiales	Ruminococcaceae	unclassified_Ruminococcaceae	0.00018053	M03062_107_000000000CBKND_1_1113_8941_11067	0.000571527	0.000704883	4.28645e-05	3.81018e-05	3.81018e-05	0	5.71527e-05	0.000228611	0.000114305	0	0.00297194	5.71527e-05	5.71527e-05	5.71527e-05	5.71527e-05	0.00377208	0.000228611	5.71527e-05	0	0.000171458	0	0	0	0.000171458	0	5.71527e-05	0	0	0.000171458	5.71527e-05	0	0	0	0	0	0	0	0
Otu00519	Bacteria;Firmicutes;Clostridia;Clostridiales;Ruminococcaceae;unclassified_Ruminococcaceae	Firmicutes	Clostridia	Clostridiales	Ruminococcaceae	unclassified_Ruminococcaceae	0.000177808	M03062_107_000000000CBKND_1_2116_16408_11260	0.000219085	0.000171458	0.000114305	0.000133356	0.000238136	0.00070012	0.000285763	0.000228611	0.000171458	5.71527e-05	0.000228611	0.000342916	0.000114305	0.000171458	5.71527e-05	0.000400069	0.000171458	0.000114305	0.000114305	0	0.000228611	0.000114305	5.71527e-05	0.000114305	0.000228611	5.71527e-05	0.000171458	0.000171458	5.71527e-05	0.000171458	0.000228611	0	5.71527e-05	0.000914442	0	0.000514374	0.00222895	5.71527e-05
Otu00520	Bacteria;Firmicutes;unclassified_Firmicutes;;;	Firmicutes	unclassified_Firmicutes				0.000175994	M03062_107_000000000CBKND_1_1116_25664_20061	0.000171458	0.00010478	8.5729e-05	0.000323865	0.000133356	0.000100017	0.000114305	0.000228611	0.000114305	5.71527e-05	0.000114305	0.000400069	0.000171458	5.71527e-05	0.000171458	5.71527e-05	0.000114305	5.71527e-05	0.000114305	0.000171458	0	5.71527e-05	0	0	0	0.00165743	0.000285763	0	0	0	0.000400069	0.000114305	0	0.000285763	0	5.71527e-05	0.000342916	0
Otu00521	Bacteria;Firmicutes;Clostridia;Clostridiales;Lachnospiraceae;unclassified_Lachnospiraceae	Firmicutes	Clostridia	Clostridiales	Lachnospiraceae	unclassified_Lachnospiraceae	0.00017418	M06047_81_000000000CBLT5_1_2117_11764_8814	7.62035e-05	0	2.85763e-05	0	0	0	0	5.71527e-05	0	0	0	0.000400069	0	0	0	0	0	0	5.71527e-05	5.71527e-05	0	0	0	0	0	0	0	0	0	0	0	0	0	0	0	0	0	0
Otu00522	Bacteria;Bacteroidetes;Bacteroidia;Bacteroidales;Porphyromonadaceae;unclassified_Porphyromonadaceae	Bacteroidetes	Bacteroidia	Bacteroidales	Porphyromonadaceae	unclassified_Porphyromonadaceae	0.00017418	M06047_81_000000000CBLT5_1_1115_14810_19818	0.000180983	0.000133356	0.000114305	0.000114305	0.00010478	7.14408e-05	0.000171458	5.71527e-05	0.000228611	0.000114305	0.000342916	0.000171458	0.000114305	5.71527e-05	5.71527e-05	0.000457221	0	0.000114305	0.000171458	5.71527e-05	5.71527e-05	0.000171458	0.000228611	0	0.000114305	0.000285763	5.71527e-05	0	0	0.000228611	0	0	0.000400069	0	0.000171458	0	5.71527e-05	5.71527e-05
Otu00523	Bacteria;Actinobacteria;Actinobacteria;Coriobacteriales;Coriobacteriaceae;Olsenella	Actinobacteria	Actinobacteria	Coriobacteriales	Coriobacteriaceae	Olsenella	0.000172365	M06047_81_000000000CBLT5_1_2111_12417_11168	0.000142882	2.85763e-05	0.000100017	0.00064773	9.52544e-06	2.85763e-05	5.71527e-05	0.000171458	0.000171458	0.000114305	0.000228611	0.000114305	0	0.000114305	0	0	5.71527e-05	0	0.000342916	5.71527e-05	0	0	0.000228611	0.000285763	0.000171458	0.00257187	0	0.000628679	0	5.71527e-05	0	0	0	0	0	5.71527e-05	0	5.71527e-05
Otu00524	Bacteria;Firmicutes;Clostridia;Clostridiales;Ruminococcaceae;Clostridium IV	Firmicutes	Clostridia	Clostridiales	Ruminococcaceae	Clostridium IV	0.000170551	M03062_107_000000000CBKND_1_1109_10246_4877	3.81018e-05	4.76272e-05	2.85763e-05	4.76272e-05	9.52544e-06	0.000100017	0	5.71527e-05	0	0	0.000171458	0	5.71527e-05	0	0	0.000171458	5.71527e-05	0	0	0.000114305	0	0	0	0	0	5.71527e-05	0.000114305	0.000114305	0	0	5.71527e-05	0	0	0	0	0.000400069	0	0
Otu00525	Bacteria;Firmicutes;Clostridia;Clostridiales;Ruminococcaceae;Clostridium IV	Firmicutes	Clostridia	Clostridiales	Ruminococcaceae	Clostridium IV	0.000170551	C70117_71_000000000C45C2_1_1111_25596_12179	0.000219085	6.66781e-05	2.85763e-05	0.000266712	0.000247662	0.000200034	0.000114305	0.000800137	5.71527e-05	0.000171458	5.71527e-05	0.000114305	0.000114305	0.000171458	0	5.71527e-05	5.71527e-05	0	0	5.71527e-05	5.71527e-05	0	5.71527e-05	0	0.000114305	0.000342916	0.000628679	0.000457221	0	0	0.000571527	0	0.000457221	0.000457221	0	0.000457221	0.000171458	0.000171458
Otu00526	Bacteria;Firmicutes;Clostridia;Clostridiales;unclassified_Clostridiales;	Firmicutes	Clostridia	Clostridiales	unclassified_Clostridiales		0.000169644	C70117_71_000000000C45C2_1_1111_24998_16089	0.000133356	7.62035e-05	0.000114305	0.000152407	7.62035e-05	0.000200034	0.000114305	0.000171458	0.000114305	0.000228611	5.71527e-05	0.000114305	0.000114305	0	0.000171458	0.000171458	0	0	0.000342916	0	0.000114305	0	5.71527e-05	5.71527e-05	0.000228611	0.000114305	0.000342916	0.000114305	0	0	0.000228611	0	5.71527e-05	0.000171458	0.000228611	0.000571527	0	0
Otu00527	Bacteria;Firmicutes;Clostridia;Clostridiales;Lachnospiraceae;unclassified_Lachnospiraceae	Firmicutes	Clostridia	Clostridiales	Lachnospiraceae	unclassified_Lachnospiraceae	0.000169644	M06047_81_000000000CBLT5_1_1114_14733_9540	0.000323865	5.71527e-05	0	8.5729e-05	0.000238136	0.000328628	5.71527e-05	0.000457221	0.000285763	0.000114305	0.000400069	0.000628679	0	0.000171458	0	5.71527e-05	5.71527e-05	5.71527e-05	0	0	0	0	0	0	5.71527e-05	5.71527e-05	0.000400069	0	0	5.71527e-05	0.000457221	5.71527e-05	0.000685832	0.000171458	0.000114305	0.000285763	0.000800137	0.000114305
Otu00528	Bacteria;Firmicutes;Clostridia;Clostridiales;unclassified_Clostridiales;	Firmicutes	Clostridia	Clostridiales	unclassified_Clostridiales		0.000166015	M06047_81_000000000CBLT5_1_2105_8251_18496	0.00010478	0.000714408	2.85763e-05	1.90509e-05	9.52544e-05	5.71527e-05	0.000114305	5.71527e-05	0	0	0.000342916	0.000114305	0	0.000971595	0.00120021	0.00182888	0.000114305	0.000171458	0	0	0	0.000114305	0	0	0	0	0	0.000114305	0	0.000571527	0	0	0	0	0.000228611	0	0	0
Otu00529	Bacteria;Firmicutes;Clostridia;Clostridiales;Ruminococcaceae;Clostridium IV	Firmicutes	Clostridia	Clostridiales	Ruminococcaceae	Clostridium IV	0.000166015	M01394_160_000000000C9RJW_1_2108_18639_3725	0.000152407	0.000419119	0.000214322	2.85763e-05	6.66781e-05	2.85763e-05	0.000171458	5.71527e-05	0.000171458	0.000514374	0	0	0.00148597	0	0.000457221	0.000457221	5.71527e-05	5.71527e-05	0.000685832	0.000114305	5.71527e-05	0	0	0	0	5.71527e-05	5.71527e-05	5.71527e-05	0	0.000285763	5.71527e-05	5.71527e-05	0	0	0	0	0.000114305	0
Otu00530	Bacteria;Firmicutes;Clostridia;Clostridiales;Lachnospiraceae;unclassified_Lachnospiraceae	Firmicutes	Clostridia	Clostridiales	Lachnospiraceae	unclassified_Lachnospiraceae	0.000166015	M06047_81_000000000CBLT5_1_1113_6908_24029	0.000171458	1.90509e-05	4.28645e-05	9.52544e-05	0.000123831	0.00031434	0.000171458	0.000171458	5.71527e-05	0.000171458	0.000342916	0.000114305	0.000114305	0	0	0	0	0	5.71527e-05	5.71527e-05	0	5.71527e-05	5.71527e-05	5.71527e-05	0	5.71527e-05	0.000342916	5.71527e-05	5.71527e-05	0	0.000171458	0	0.000171458	0.000342916	0	0.000571527	0.000628679	5.71527e-05
Otu00531	Bacteria;Bacteroidetes;Bacteroidia;Bacteroidales;Bacteroidaceae;Bacteroides	Bacteroidetes	Bacteroidia	Bacteroidales	Bacteroidaceae	Bacteroides	0.000166015	M06047_81_000000000CBLT5_1_2102_26920_15430	0.000485798	0.000152407	5.71527e-05	0	0.00010478	1.42882e-05	5.71527e-05	0.000400069	0	0	0.000457221	0.00200034	0	0	0	0	0.000914442	0	0	0.000228611	0	0	0	0	0	0	0	0	0	0	0	0.000628679	0	0	0	0	0	5.71527e-05
Otu00532	Bacteria;Firmicutes;Clostridia;Clostridiales;Ruminococcaceae;Gemmiger	Firmicutes	Clostridia	Clostridiales	Ruminococcaceae	Gemmiger	0.000166015	M03062_107_000000000CBKND_1_2113_24451_15352	0.000371492	0.000295289	0.000300051	0	8.5729e-05	0.000185746	0	0.0020575	0	0	0.000171458	0	0	0	0	0.000171458	0.00160027	0	0	0.000685832	0.000514374	0	0	0	0	0	0	0	0	0	0	0.000514374	0	0	0	0	0	0.000742985
Otu00533	Bacteria;Firmicutes;Clostridia;Clostridiales;Lachnospiraceae;unclassified_Lachnospiraceae	Firmicutes	Clostridia	Clostridiales	Lachnospiraceae	unclassified_Lachnospiraceae	0.000165108	M01394_160_000000000C9RJW_1_1106_12132_18536	0.000142882	0.000152407	8.5729e-05	0.000190509	0.00020956	0.000400069	0.000228611	0	0	0	5.71527e-05	0.000571527	5.71527e-05	0.000114305	0.000285763	0.000228611	0.000171458	5.71527e-05	0.000114305	0	0	0.000228611	0	0	0.000228611	5.71527e-05	0.000114305	0.000742985	0	0	0.000342916	5.71527e-05	0.000342916	0.000514374	0.000171458	0.000285763	0.000228611	0.000914442
Otu00534	Bacteria;Firmicutes;Clostridia;Clostridiales;Lachnospiraceae;unclassified_Lachnospiraceae	Firmicutes	Clostridia	Clostridiales	Lachnospiraceae	unclassified_Lachnospiraceae	0.000165108	C70117_71_000000000C45C2_1_1118_4428_15236	0.000190509	5.71527e-05	2.85763e-05	0.000342916	0.000123831	0.000100017	5.71527e-05	0.000342916	0.000285763	0.000114305	0.000171458	0.000171458	0.000171458	0.000171458	0	0	0	0	0	5.71527e-05	0	5.71527e-05	0.000742985	0.000685832	5.71527e-05	5.71527e-05	0.000457221	5.71527e-05	0.000171458	5.71527e-05	0.000228611	0.000114305	0.000171458	0	5.71527e-05	5.71527e-05	0.000228611	5.71527e-05
Otu00535	Bacteria;Firmicutes;Clostridia;Clostridiales;Lachnospiraceae;unclassified_Lachnospiraceae	Firmicutes	Clostridia	Clostridiales	Lachnospiraceae	unclassified_Lachnospiraceae	0.000165108	M06047_81_000000000CBLT5_1_1106_13094_15633	0.000161933	0.000600103	0.000171458	4.76272e-05	0.000180983	0.000285763	5.71527e-05	0.000171458	0.000342916	5.71527e-05	0.000228611	0.000114305	5.71527e-05	0.000228611	0	0.000171458	0.00188604	0.00125736	0.000114305	5.71527e-05	0.000114305	0.000400069	0	0	0	0.000228611	0	5.71527e-05	0.000400069	0.000514374	0	5.71527e-05	0.000114305	0	0.000742985	0	0.000342916	5.71527e-05
Otu00536	Bacteria;Firmicutes;Clostridia;Clostridiales;Ruminococcaceae;unclassified_Ruminococcaceae	Firmicutes	Clostridia	Clostridiales	Ruminococcaceae	unclassified_Ruminococcaceae	0.000165108	M06047_81_000000000CBLT5_1_1102_9384_13226	0.000257187	5.71527e-05	0.000214322	7.62035e-05	9.52544e-05	2.85763e-05	5.71527e-05	0.000628679	0	5.71527e-05	0.000571527	0.000228611	5.71527e-05	0	0	0.000114305	5.71527e-05	0.000114305	5.71527e-05	0.000685832	5.71527e-05	5.71527e-05	0.000171458	5.71527e-05	0.000114305	0.000114305	0	0	0.000114305	0.000285763	5.71527e-05	5.71527e-05	0	5.71527e-05	0	5.71527e-05	5.71527e-05	0
Otu00537	Bacteria;Firmicutes;Clostridia;Clostridiales;Peptostreptococcaceae;Terrisporobacter	Firmicutes	Clostridia	Clostridiales	Peptostreptococcaceae	Terrisporobacter	0.0001642	M03062_107_000000000CBKND_1_1103_14033_5829	0	9.52544e-06	0.000257187	0	1.90509e-05	0.00121449	0	0	0	0	0	0	0	0	0	0	5.71527e-05	0	5.71527e-05	5.71527e-05	0.000800137	0.000114305	0	0	0	0	0	0	5.71527e-05	0	0	5.71527e-05	0	0	0.0020575	0	0	0.00280048
Otu00538	Bacteria;Firmicutes;Clostridia;Clostridiales;Ruminococcaceae;unclassified_Ruminococcaceae	Firmicutes	Clostridia	Clostridiales	Ruminococcaceae	unclassified_Ruminococcaceae	0.000163293	M01394_160_000000000C9RJW_1_1112_8676_12757	0.000400069	0.000161933	5.71527e-05	6.66781e-05	0.00033339	0.000171458	0.000342916	0.000114305	0.000171458	0.000742985	0.000400069	0.000628679	0.000457221	0.000228611	0.000114305	0.000171458	0	0	5.71527e-05	0	5.71527e-05	0.000114305	0	0	5.71527e-05	5.71527e-05	0.000114305	0.000171458	0	0.00085729	0.000228611	0.000114305	0.000171458	0.000628679	0.000228611	0.000114305	5.71527e-05	0.000285763
Otu00539	Bacteria;Firmicutes;Clostridia;Clostridiales;Ruminococcaceae;unclassified_Ruminococcaceae	Firmicutes	Clostridia	Clostridiales	Ruminococcaceae	unclassified_Ruminococcaceae	0.000163293	M06047_81_000000000CBLT5_1_2112_21433_13893	8.5729e-05	0.00043817	0.000442933	2.85763e-05	0.000381018	5.71527e-05	5.71527e-05	0	0.000171458	0	0.000228611	5.71527e-05	5.71527e-05	0.000171458	5.71527e-05	0.000171458	0.000971595	0.00120021	0.000171458	0.000514374	0	0.0010859	0	0	0	0.000114305	5.71527e-05	0	0.00085729	0.000628679	0.000400069	0.000342916	0	5.71527e-05	0.000114305	5.71527e-05	0	5.71527e-05
Otu00540	Bacteria;Firmicutes;Clostridia;Clostridiales;Lachnospiraceae;unclassified_Lachnospiraceae	Firmicutes	Clostridia	Clostridiales	Lachnospiraceae	unclassified_Lachnospiraceae	0.000162386	M06047_81_000000000CBLT5_1_1119_26148_4934	8.5729e-05	1.90509e-05	0.000214322	0.000476272	0.000257187	0.000300051	0	0.000114305	0	5.71527e-05	0.000171458	0.000171458	0	0	0	0	0	0.000114305	0.000285763	0.000571527	0	0	0.00102875	0.000457221	0.000114305	0.000800137	0.000171458	0.000285763	0.000114305	5.71527e-05	0.000114305	0.000971595	0	0.000285763	5.71527e-05	0.000685832	0	0.000457221
Otu00541	Bacteria;Firmicutes;Clostridia;Clostridiales;Lachnospiraceae;unclassified_Lachnospiraceae	Firmicutes	Clostridia	Clostridiales	Lachnospiraceae	unclassified_Lachnospiraceae	0.000162386	M06047_81_000000000CBLT5_1_1101_24664_8349	0.000142882	4.76272e-05	0	0.000161933	0.00020956	0.000242899	0.000742985	5.71527e-05	0	0	5.71527e-05	0	0	0.000285763	0	0	0	0	0	0	0	0	0	0.000171458	0	0.000571527	0.000228611	0	0	0.00114305	5.71527e-05	5.71527e-05	0	0	0.000914442	5.71527e-05	0	0
Otu00542	Bacteria;Firmicutes;Clostridia;Clostridiales;Ruminococcaceae;unclassified_Ruminococcaceae	Firmicutes	Clostridia	Clostridiales	Ruminococcaceae	unclassified_Ruminococcaceae	0.000162386	C70117_71_000000000C45C2_1_2104_7001_7854	0.000123831	9.52544e-06	1.42882e-05	0.000200034	0.000219085	0.00054295	0	0.000342916	5.71527e-05	0	0.000228611	0.000114305	5.71527e-05	0	0	0	0	0	0	0	5.71527e-05	0	0.000114305	0.000171458	0.000171458	0	0.000400069	0.000342916	5.71527e-05	0.000114305	0.000228611	0	0.000628679	0.000285763	0	0.00085729	0.00102875	0.000285763
Otu00543	Bacteria;Proteobacteria;Alphaproteobacteria;Rhodobacterales;Rhodobacteraceae;unclassified_Rhodobacteraceae	Proteobacteria	Alphaproteobacteria	Rhodobacterales	Rhodobacteraceae	unclassified_Rhodobacteraceae	0.000162386	C70117_71_000000000C45C2_1_2113_12171_6932	6.66781e-05	0	0	4.76272e-05	7.62035e-05	0	0	0	0	0.000285763	0	0.000114305	0	0	0	0	0	0	0	0	0	0	0.000114305	0.000171458	0	0	0	0	0.000457221	0	0	0	0	0	0	0	0	0
Otu00544	Bacteria;Firmicutes;Clostridia;Clostridiales;Lachnospiraceae;unclassified_Lachnospiraceae	Firmicutes	Clostridia	Clostridiales	Lachnospiraceae	unclassified_Lachnospiraceae	0.000161479	M06047_81_000000000CBLT5_1_2101_11264_18599	0.000171458	4.76272e-05	0.000128593	9.52544e-06	9.52544e-06	7.14408e-05	0	0.000400069	0	0	0.000228611	0.000400069	0	0	5.71527e-05	0	0.000228611	0	0.000400069	0	0.000114305	0	0	0	0	0	5.71527e-05	0	0	0	0	5.71527e-05	0	0	0	0.000171458	0.000114305	0
Otu00545	Bacteria;Firmicutes;Clostridia;Clostridiales;Ruminococcaceae;unclassified_Ruminococcaceae	Firmicutes	Clostridia	Clostridiales	Ruminococcaceae	unclassified_Ruminococcaceae	0.000158757	M06047_81_000000000CBLT5_1_2105_25394_12455	0.000304814	0.00020956	2.85763e-05	9.52544e-05	0.00020956	0.000457221	5.71527e-05	0.000285763	0.000457221	0.000571527	0.000400069	5.71527e-05	0.000457221	0.000571527	0.000114305	5.71527e-05	0	5.71527e-05	0	5.71527e-05	5.71527e-05	0	0	0	0.000114305	5.71527e-05	5.71527e-05	0.000342916	5.71527e-05	0.000114305	0.000114305	0	0	0.000971595	5.71527e-05	0.000285763	0.000457221	0.00102875
Otu00546	Bacteria;Bacteroidetes;Bacteroidia;Bacteroidales;Porphyromonadaceae;Butyricimonas	Bacteroidetes	Bacteroidia	Bacteroidales	Porphyromonadaceae	Butyricimonas	0.00015785	M06047_81_000000000CBLT5_1_2111_14012_19374	6.66781e-05	0.000266712	0.000414357	0.000304814	0.000400069	0.00015717	5.71527e-05	5.71527e-05	0.000114305	0	5.71527e-05	0.000114305	0	0.000342916	0.000114305	0	0.000114305	0.00102875	0.000171458	0.000628679	5.71527e-05	0.000800137	0.000342916	0.000514374	0	0.000685832	0.000171458	0.000114305	0.000171458	0.000114305	0.000114305	0.00177173	0.000228611	0	0.000514374	5.71527e-05	5.71527e-05	0
Otu00547	Bacteria;Firmicutes;Clostridia;Clostridiales;Lachnospiraceae;unclassified_Lachnospiraceae	Firmicutes	Clostridia	Clostridiales	Lachnospiraceae	unclassified_Lachnospiraceae	0.00015785	M06047_81_000000000CBLT5_1_2101_7874_2730	0.000447696	0.000276238	2.85763e-05	0.00010478	0.000257187	1.42882e-05	5.71527e-05	0.0021718	0	0	0.000228611	0.000228611	0.000800137	0.000685832	0	0	5.71527e-05	0.000114305	0.000114305	0	0	0	0	0	0	5.71527e-05	0.000571527	0	0	0	0.000971595	0	0.000457221	0.000114305	0	0	5.71527e-05	0
Otu00548	Bacteria;Firmicutes;Clostridia;Clostridiales;unclassified_Clostridiales;	Firmicutes	Clostridia	Clostridiales	unclassified_Clostridiales		0.00015785	M06047_81_000000000CBLT5_1_2103_10121_5540	1.90509e-05	4.76272e-05	0.00105732	0	0	0.000100017	0	5.71527e-05	0	0	5.71527e-05	0	0	0.000114305	5.71527e-05	5.71527e-05	0	5.71527e-05	0.00200034	0.000514374	0.000971595	0.000742985	0	0	0	0	0	0	0	0	0	0	0	0	0	0	0	0.000400069
Otu00549	Bacteria;Firmicutes;Clostridia;Clostridiales;unclassified_Clostridiales;	Firmicutes	Clostridia	Clostridiales	unclassified_Clostridiales		0.000156943	M03062_107_000000000CBKND_1_2116_8342_3664	0.000247662	0.000219085	1.42882e-05	0.000161933	0.00020956	0.000142882	0.000228611	0.000171458	0.000685832	5.71527e-05	0.000171458	0.000171458	0.000171458	0.000685832	0.000171458	0.000114305	0.000114305	5.71527e-05	5.71527e-05	0	0	0	5.71527e-05	0	0.000114305	5.71527e-05	0.000400069	0.000342916	0.000171458	0.000228611	0.000228611	5.71527e-05	0.000285763	0.000285763	5.71527e-05	0.000114305	0.000400069	0
Otu00550	Bacteria;unclassified_Bacteria;;;;	unclassified_Bacteria					0.000156943	C70117_71_000000000C45C2_1_2114_8280_20010	0.000114305	4.76272e-05	2.85763e-05	0.00010478	7.62035e-05	0.000400069	0.000400069	5.71527e-05	0	0	0	0.000228611	0.000171458	5.71527e-05	0	0	0	5.71527e-05	5.71527e-05	0	5.71527e-05	0	0	0	0	0.000400069	0.000171458	5.71527e-05	0	0.000114305	0.000342916	0	0	0	0.00120021	0.000285763	0.000114305	0
Otu00551	Bacteria;Firmicutes;Clostridia;Clostridiales;Ruminococcaceae;unclassified_Ruminococcaceae	Firmicutes	Clostridia	Clostridiales	Ruminococcaceae	unclassified_Ruminococcaceae	0.000156036	M06047_81_000000000CBLT5_1_2118_7278_20272	0.000419119	1.90509e-05	0.00147168	9.52544e-06	0	0	0	0	0	0	5.71527e-05	0.00245756	0	0	5.71527e-05	0	5.71527e-05	0	0.00577242	0.000114305	0	0	0	0	0	5.71527e-05	0	0	0	0	0	0	0	0	0	0	0	0
Otu00552	Bacteria;Firmicutes;Clostridia;Clostridiales;Ruminococcaceae;unclassified_Ruminococcaceae	Firmicutes	Clostridia	Clostridiales	Ruminococcaceae	unclassified_Ruminococcaceae	0.000155129	C70117_71_000000000C45C2_1_2111_5168_17558	0.000190509	0.000123831	2.85763e-05	0.000171458	0.000142882	0.000242899	0.000114305	0.000228611	0.000114305	5.71527e-05	0.000457221	0.000171458	0.000342916	0.000171458	5.71527e-05	0.000171458	0	0	0	0.000114305	0	0	0.000342916	0.000457221	5.71527e-05	0	0.000114305	5.71527e-05	5.71527e-05	5.71527e-05	0.000228611	0	5.71527e-05	0.000457221	0.000114305	0.000457221	0.000342916	5.71527e-05
Otu00553	Bacteria;Firmicutes;Clostridia;Clostridiales;Ruminococcaceae;unclassified_Ruminococcaceae	Firmicutes	Clostridia	Clostridiales	Ruminococcaceae	unclassified_Ruminococcaceae	0.000155129	M06047_81_000000000CBLT5_1_1101_18825_9584	5.71527e-05	0.000180983	0.000843002	2.85763e-05	0.000295289	4.28645e-05	0	0.000171458	0	0.000171458	0	0	0.000114305	5.71527e-05	5.71527e-05	0	0.000457221	0.000400069	0.000342916	0.00211465	5.71527e-05	0.00085729	0	0	5.71527e-05	0	0	0.000114305	0.000685832	0.000228611	0	0.000800137	5.71527e-05	0	5.71527e-05	0	5.71527e-05	5.71527e-05
Otu00554	Bacteria;Firmicutes;Clostridia;Clostridiales;Ruminococcaceae;unclassified_Ruminococcaceae	Firmicutes	Clostridia	Clostridiales	Ruminococcaceae	unclassified_Ruminococcaceae	0.000155129	M06047_81_000000000CBLT5_1_2116_19253_24074	0.000581052	0.000581052	0	9.52544e-05	0.000180983	1.42882e-05	0.000457221	5.71527e-05	0.000514374	0.000114305	0.00228611	5.71527e-05	0.000514374	0	0.000114305	0.00285763	0	0	0	0	0	0	0	0.000114305	0	0.000457221	0	0	0	0.000685832	0	0.000400069	0	0	5.71527e-05	0	0	0
Otu00555	Bacteria;Firmicutes;Erysipelotrichia;Erysipelotrichales;Erysipelotrichaceae;Erysipelotrichaceae_incertae_sedis	Firmicutes	Erysipelotrichia	Erysipelotrichales	Erysipelotrichaceae	Erysipelotrichaceae_incertae_sedis	0.000154221	M06047_81_000000000CBLT5_1_2114_13403_6660	7.62035e-05	2.85763e-05	0	5.71527e-05	5.71527e-05	2.85763e-05	5.71527e-05	0	0.000342916	5.71527e-05	0	0	0.000171458	0	0	0	0	0	0	0	0	0	0	0	0.000114305	0	0.000171458	5.71527e-05	0	0	0.000228611	0	0	0.000114305	0	5.71527e-05	0	5.71527e-05
Otu00556	Bacteria;Firmicutes;Clostridia;Clostridiales;Ruminococcaceae;Clostridium IV	Firmicutes	Clostridia	Clostridiales	Ruminococcaceae	Clostridium IV	0.000152407	C70117_71_000000000C45C2_1_2117_5494_18558	0.000123831	0.000171458	0.000171458	0.000142882	0.000114305	0.000171458	5.71527e-05	0.000171458	0.000228611	5.71527e-05	5.71527e-05	0.000171458	0.000457221	0.000114305	0.000171458	0.000114305	0.000171458	0	0.000114305	0.000342916	0	0.000228611	0.000171458	0.000114305	0.000228611	0.000171458	5.71527e-05	0.000114305	0.000228611	0	0.000114305	0.000228611	5.71527e-05	5.71527e-05	0.000114305	5.71527e-05	0.000114305	0.000400069
Otu00557	Bacteria;Firmicutes;Clostridia;Clostridiales;Ruminococcaceae;unclassified_Ruminococcaceae	Firmicutes	Clostridia	Clostridiales	Ruminococcaceae	unclassified_Ruminococcaceae	0.000152407	M06047_81_000000000CBLT5_1_1109_10598_5539	0.000180983	2.85763e-05	1.42882e-05	6.66781e-05	9.52544e-05	0.000185746	5.71527e-05	0.000571527	0	5.71527e-05	0.000171458	0.000228611	0.000114305	0	0	0	5.71527e-05	0	0	0	0	5.71527e-05	0	0	0	0.000171458	0.000228611	0	5.71527e-05	5.71527e-05	5.71527e-05	5.71527e-05	0.000285763	5.71527e-05	0.000171458	0.000114305	0.000400069	5.71527e-05
Otu00558	Bacteria;Firmicutes;Clostridia;Clostridiales;Ruminococcaceae;unclassified_Ruminococcaceae	Firmicutes	Clostridia	Clostridiales	Ruminococcaceae	unclassified_Ruminococcaceae	0.000152407	C70117_71_000000000C45C2_1_1105_13387_7440	0.000133356	0.000171458	1.42882e-05	0.00010478	9.52544e-05	0.000128593	0.000171458	0	0.000228611	5.71527e-05	0.000114305	0.000228611	0.000342916	0.000114305	0.000171458	0.000228611	0.000171458	0	5.71527e-05	0	0	0	0.000114305	5.71527e-05	0	0.000285763	5.71527e-05	0.000114305	0.000114305	0	0.000114305	0	0.000114305	0.000228611	5.71527e-05	0.000114305	0.000285763	5.71527e-05
Otu00559	Bacteria;Firmicutes;Clostridia;Clostridiales;Lachnospiraceae;unclassified_Lachnospiraceae	Firmicutes	Clostridia	Clostridiales	Lachnospiraceae	unclassified_Lachnospiraceae	0.000152407	M06047_81_000000000CBLT5_1_2102_20628_21479	0.00020956	6.66781e-05	1.42882e-05	2.85763e-05	4.76272e-05	2.85763e-05	0.000400069	0.000285763	0.000114305	5.71527e-05	0.000400069	0	5.71527e-05	0.000285763	0	0	0	5.71527e-05	5.71527e-05	0	0	0	0	0	5.71527e-05	5.71527e-05	5.71527e-05	0	0	5.71527e-05	0.000114305	0	0.000114305	0	0	0	0.000114305	0
Otu00560	Bacteria;Firmicutes;Clostridia;Clostridiales;Lachnospiraceae;Lachnospiracea_incertae_sedis	Firmicutes	Clostridia	Clostridiales	Lachnospiraceae	Lachnospiracea_incertae_sedis	0.0001515	C70117_71_000000000C45C2_1_1108_8684_18924	9.52544e-05	3.81018e-05	0	0.00010478	0.00033339	0.000985883	0	0.000342916	5.71527e-05	0	0.000114305	5.71527e-05	5.71527e-05	5.71527e-05	0	0	0	0.000114305	0	0	0	0	5.71527e-05	0	0.000285763	0	0.000285763	0	0	0	0.000285763	0	0.000114305	0.00160027	0	0.00085729	0.00240041	0.000685832
Otu00561	Bacteria;Firmicutes;Clostridia;Clostridiales;Ruminococcaceae;unclassified_Ruminococcaceae	Firmicutes	Clostridia	Clostridiales	Ruminococcaceae	unclassified_Ruminococcaceae	0.0001515	M03062_107_000000000CBKND_1_2111_13694_16597	0.000219085	0.000266712	0.000214322	0	0.00010478	0.000171458	0	0.00114305	0	0	0.000171458	0	0	0	0	0.000114305	0.00148597	0	0.000114305	0.000571527	0.000171458	0	0	0	0	0	0	0	0	0	0	0.000628679	0	0	0	0	0	0.000685832
Otu00562	Bacteria;Firmicutes;Clostridia;Clostridiales;Lachnospiraceae;unclassified_Lachnospiraceae	Firmicutes	Clostridia	Clostridiales	Lachnospiraceae	unclassified_Lachnospiraceae	0.000150593	M06047_81_000000000CBLT5_1_2105_25690_15741	0.000304814	0.000590577	0.00015717	5.71527e-05	7.62035e-05	1.42882e-05	0	0.000800137	0	0	0.00102875	0	0	0.000171458	0.000285763	0.00137166	0.00171458	0	0	0.000628679	0	0	0.000342916	0	0	0	0	0	0.000114305	0	0	0.000342916	0	0	0	0	0	5.71527e-05
Otu00563	Bacteria;Firmicutes;Clostridia;Clostridiales;Lachnospiraceae;unclassified_Lachnospiraceae	Firmicutes	Clostridia	Clostridiales	Lachnospiraceae	unclassified_Lachnospiraceae	0.000150593	M01394_160_000000000C9RJW_1_2110_28173_14334	0	0	4.28645e-05	0.00020956	0.000409594	0.000771561	0	0	0	0	0	0	0	0	0	0	0	0	0	0	0.000171458	0	0	0	0.000457221	0	0.000171458	0.000628679	0	0	0.000228611	0	0.000285763	0.00194319	0	0.00308624	0	0
Otu00564	Bacteria;Firmicutes;Bacilli;Bacillales;Bacillales_Incertae Sedis XI;Gemella	Firmicutes	Bacilli	Bacillales	Bacillales_Incertae Sedis XI	Gemella	0.000149686	M06047_81_000000000CBLT5_1_2108_10400_14185	4.76272e-05	0.000152407	0.000200034	0.000238136	9.52544e-05	1.42882e-05	0.000114305	5.71527e-05	0	0	0.000114305	0	0.000628679	5.71527e-05	5.71527e-05	0.000114305	0	5.71527e-05	0.000400069	5.71527e-05	0.000285763	5.71527e-05	0.000400069	0.000628679	0.000285763	5.71527e-05	0	5.71527e-05	0	0.000514374	0	0	5.71527e-05	0	0	0	5.71527e-05	0
Otu00565	Bacteria;Proteobacteria;Deltaproteobacteria;Desulfovibrionales;unclassified_Desulfovibrionales;	Proteobacteria	Deltaproteobacteria	Desulfovibrionales	unclassified_Desulfovibrionales		0.000149686	M06047_81_000000000CBLT5_1_2112_14024_8956	0.000180983	0.000133356	2.85763e-05	8.5729e-05	0.000200034	0.00031434	0.000171458	0.000285763	0.000285763	0.000114305	5.71527e-05	0.000171458	0.000114305	0.000342916	0.000114305	0.000171458	0	5.71527e-05	5.71527e-05	0	5.71527e-05	0	0	0.000114305	0	5.71527e-05	0.000228611	0.000114305	5.71527e-05	0.000171458	0.000114305	5.71527e-05	0.000285763	0.000514374	0.000228611	0.000571527	0.000228611	0.000228611
Otu00566	Bacteria;Firmicutes;Clostridia;Clostridiales;Ruminococcaceae;unclassified_Ruminococcaceae	Firmicutes	Clostridia	Clostridiales	Ruminococcaceae	unclassified_Ruminococcaceae	0.000148778	C70117_71_000000000C45C2_1_2119_19116_4675	0.00010478	0.000123831	0.000214322	9.52544e-06	0.00010478	8.5729e-05	0	0.000342916	0.000171458	5.71527e-05	0	5.71527e-05	0.000114305	5.71527e-05	0.000285763	0	0.000228611	5.71527e-05	0.000171458	0.000285763	5.71527e-05	0.000342916	0	0	0	5.71527e-05	0	0	0	5.71527e-05	0.000285763	0.000228611	0	5.71527e-05	0.000342916	0	0	0
Otu00567	Bacteria;Firmicutes;Clostridia;Clostridiales;Ruminococcaceae;Clostridium IV	Firmicutes	Clostridia	Clostridiales	Ruminococcaceae	Clostridium IV	0.000147871	C70117_71_000000000C45C2_1_2102_16177_6005	0.000171458	0.000142882	1.42882e-05	0.000142882	0.000123831	0.000300051	0.000114305	0.000114305	0.000285763	0.000114305	0.000342916	5.71527e-05	0.000114305	0.000228611	5.71527e-05	0.000342916	5.71527e-05	5.71527e-05	0	5.71527e-05	0	0	0	0	0.000171458	0.000285763	0.000171458	0.000228611	0	0.000171458	0	0	0.000114305	0.000457221	5.71527e-05	0.000285763	0.000685832	0.000171458
Otu00568	Bacteria;Firmicutes;Clostridia;Clostridiales;Ruminococcaceae;unclassified_Ruminococcaceae	Firmicutes	Clostridia	Clostridiales	Ruminococcaceae	unclassified_Ruminococcaceae	0.000147871	M03062_107_000000000CBKND_1_1111_9825_7913	0.00020956	0.000600103	2.85763e-05	9.52544e-06	1.90509e-05	2.85763e-05	0	5.71527e-05	5.71527e-05	5.71527e-05	0.0010859	0	0.00280048	0.000228611	0.000285763	0.000285763	0	0	0	0	0.000114305	0	5.71527e-05	0	0	0	0	0	0	0	5.71527e-05	5.71527e-05	0	0	5.71527e-05	5.71527e-05	0	0
Otu00569	Bacteria;Firmicutes;unclassified_Firmicutes;;;	Firmicutes	unclassified_Firmicutes				0.000146964	M06047_81_000000000CBLT5_1_1119_14990_9317	9.52544e-05	9.52544e-05	2.85763e-05	0.000152407	8.5729e-05	0.000257187	5.71527e-05	0.000114305	5.71527e-05	0.000114305	0	0.000228611	0	0	0.000228611	0.000228611	0.000114305	0	0.000114305	0	0	0	0	0	0	0.000742985	0.000114305	5.71527e-05	0	0	0.000171458	5.71527e-05	5.71527e-05	0.000228611	0.000400069	0.000114305	0.000285763	0.000228611
Otu00570	Bacteria;Actinobacteria;Actinobacteria;Coriobacteriales;Coriobacteriaceae;unclassified_Coriobacteriaceae	Actinobacteria	Actinobacteria	Coriobacteriales	Coriobacteriaceae	unclassified_Coriobacteriaceae	0.000146964	M06047_81_000000000CBLT5_1_2108_11154_14240	0.000152407	0.000161933	0.000342916	0.00010478	0.000200034	0.000100017	0.000114305	0.000342916	0.000114305	0.000171458	0.000171458	0	0.000285763	0	0.000114305	0.000285763	0.000114305	0.000171458	0.000342916	0.000742985	5.71527e-05	0.000228611	0.000114305	0.000228611	0.000114305	5.71527e-05	5.71527e-05	5.71527e-05	0.000171458	5.71527e-05	0	0.00085729	0	0.000114305	0	0.000228611	0	0.000171458
Otu00571	Bacteria;Actinobacteria;Actinobacteria;Bifidobacteriales;Bifidobacteriaceae;Bifidobacterium	Actinobacteria	Actinobacteria	Bifidobacteriales	Bifidobacteriaceae	Bifidobacterium	0.000146964	M03062_107_000000000CBKND_1_2118_23513_21612	0.000123831	0.000228611	0.000114305	1.90509e-05	6.66781e-05	5.71527e-05	0	0.000342916	0	0	0.000400069	0	0	0	0	5.71527e-05	0.00131451	0	5.71527e-05	0.000400069	0	0	0.000114305	0	0	0	0	0	0	0	0	0.000400069	0	0	0	0	0	0.000228611
Otu00572	Bacteria;Proteobacteria;Gammaproteobacteria;Pasteurellales;Pasteurellaceae;Haemophilus	Proteobacteria	Gammaproteobacteria	Pasteurellales	Pasteurellaceae	Haemophilus	0.000146057	M03062_107_000000000CBKND_1_2108_23396_12177	0.000171458	0.000400069	0.000514374	9.52544e-06	0.000285763	2.85763e-05	0	0.000571527	0	0	0.000457221	0	0	0	5.71527e-05	5.71527e-05	0.00228611	0	0	0.0020575	0	0	0	0	0	5.71527e-05	0	0	0	0	0	0.00154312	5.71527e-05	0.000114305	0	0	0	0.000114305
Otu00573	Bacteria;Firmicutes;Clostridia;Clostridiales;Lachnospiraceae;unclassified_Lachnospiraceae	Firmicutes	Clostridia	Clostridiales	Lachnospiraceae	unclassified_Lachnospiraceae	0.000146057	M03062_107_000000000CBKND_1_2116_7927_12382	3.81018e-05	9.52544e-05	8.5729e-05	7.62035e-05	8.5729e-05	0	0.000114305	0	5.71527e-05	0	5.71527e-05	0	5.71527e-05	5.71527e-05	5.71527e-05	5.71527e-05	5.71527e-05	0.000285763	0	0.000171458	0	0.000171458	5.71527e-05	5.71527e-05	0	0.000342916	0	0	0.000171458	0	0	0.000285763	5.71527e-05	0	0	0	0	0
Otu00574	Bacteria;Firmicutes;Negativicutes;Selenomonadales;Veillonellaceae;Veillonella	Firmicutes	Negativicutes	Selenomonadales	Veillonellaceae	Veillonella	0.00014515	C70117_71_000000000C45C2_1_2109_14019_18079	0.000257187	5.71527e-05	0	0.000238136	1.90509e-05	2.85763e-05	0	0.000114305	0.000228611	0.000971595	0.000114305	0.000114305	0	0	0.000171458	5.71527e-05	0.000114305	0	0	0	0	0	0.000114305	0.000114305	0.000171458	0.00102875	0	0	5.71527e-05	5.71527e-05	0	0	0	0	0	5.71527e-05	0	5.71527e-05
Otu00575	Bacteria;Firmicutes;Clostridia;Clostridiales;Lachnospiraceae;unclassified_Lachnospiraceae	Firmicutes	Clostridia	Clostridiales	Lachnospiraceae	unclassified_Lachnospiraceae	0.00014515	M06047_81_000000000CBLT5_1_2114_11023_9547	0.000200034	6.66781e-05	0	3.81018e-05	0.00010478	0.00015717	5.71527e-05	0.000342916	5.71527e-05	5.71527e-05	0.000228611	0.000457221	5.71527e-05	0	5.71527e-05	0.000114305	0.000114305	5.71527e-05	0	0	0	0	5.71527e-05	0	5.71527e-05	5.71527e-05	5.71527e-05	0	0	0.000171458	0.000114305	5.71527e-05	5.71527e-05	0.000228611	0	0.000228611	0.000400069	0
Otu00576	Bacteria;Firmicutes;Clostridia;Clostridiales;Lachnospiraceae;unclassified_Lachnospiraceae	Firmicutes	Clostridia	Clostridiales	Lachnospiraceae	unclassified_Lachnospiraceae	0.00014515	M03062_107_000000000CBKND_1_2113_18872_9597	0.000180983	0.000171458	8.5729e-05	0.00010478	7.62035e-05	5.71527e-05	5.71527e-05	0.000114305	0.000342916	0.000114305	0.000171458	0.000285763	0.000171458	0.000342916	5.71527e-05	0.000114305	0.000114305	0.000228611	0.000171458	0.000171458	0	0	5.71527e-05	0.000114305	0.000171458	0.000171458	5.71527e-05	5.71527e-05	5.71527e-05	0.000114305	5.71527e-05	0.000228611	0	0	0	0	5.71527e-05	0.000171458
Otu00577	Bacteria;Firmicutes;Clostridia;Clostridiales;Ruminococcaceae;unclassified_Ruminococcaceae	Firmicutes	Clostridia	Clostridiales	Ruminococcaceae	unclassified_Ruminococcaceae	0.00014515	M06047_81_000000000CBLT5_1_2111_10946_9066	0.000247662	0.00010478	0.000128593	0.000161933	0.000133356	0.000285763	0	0.000228611	0.000457221	0.000342916	0.000285763	0.000171458	0.000114305	0	0.000171458	5.71527e-05	5.71527e-05	0.000228611	0.000285763	0.000114305	0.000114305	0	0	0	0.000228611	0.000228611	0.000228611	0.000285763	5.71527e-05	5.71527e-05	0.000114305	5.71527e-05	0.000400069	0.000114305	0	0.000114305	0.000800137	0.000228611
Otu00578	Bacteria;Firmicutes;Clostridia;Clostridiales;Ruminococcaceae;Flavonifractor	Firmicutes	Clostridia	Clostridiales	Ruminococcaceae	Flavonifractor	0.00014515	M03062_107_000000000CBKND_1_1112_15868_20619	0	2.85763e-05	1.42882e-05	0.000304814	0.000371492	0.00031434	0	0	0	0	0	0	0	5.71527e-05	5.71527e-05	5.71527e-05	0	0	5.71527e-05	0	0	0	0.000114305	0	0.000571527	0	0.000514374	0.000628679	5.71527e-05	0	0.000628679	0.000285763	0.000114305	0.00114305	0	0.000228611	0.000971595	5.71527e-05
Otu00579	Bacteria;Firmicutes;Clostridia;Clostridiales;Lachnospiraceae;Dorea	Firmicutes	Clostridia	Clostridiales	Lachnospiraceae	Dorea	0.000144242	C70117_71_000000000C45C2_1_1114_5471_13759	5.71527e-05	0.000361967	0.000271475	8.5729e-05	0.000371492	7.14408e-05	0	5.71527e-05	0	0	0.000285763	0	0	0.000114305	0	5.71527e-05	0.000400069	0.00160027	0.000114305	0.000285763	5.71527e-05	0.000628679	0.000228611	0.000171458	0	0	5.71527e-05	5.71527e-05	0.000742985	0.000114305	5.71527e-05	0.000514374	0.000571527	0.000228611	0.000171458	5.71527e-05	0	5.71527e-05
Otu00580	Bacteria;Proteobacteria;Betaproteobacteria;Neisseriales;Neisseriaceae;Neisseria	Proteobacteria	Betaproteobacteria	Neisseriales	Neisseriaceae	Neisseria	0.000144242	M03062_107_000000000CBKND_1_2117_28413_18910	5.71527e-05	7.62035e-05	0	0	0.0011621	2.85763e-05	0	0.000171458	0	0	0.000171458	0	0	0	0	0	0.000457221	0	0	0	0	0	0	0	0	0	0	0	0	0	0	0.00697262	0	0	0	0	0	0.000114305
Otu00581	Bacteria;Firmicutes;Clostridia;Clostridiales;Ruminococcaceae;unclassified_Ruminococcaceae	Firmicutes	Clostridia	Clostridiales	Ruminococcaceae	unclassified_Ruminococcaceae	0.000144242	M06047_81_000000000CBLT5_1_2105_10285_4295	0.000142882	0.000114305	5.71527e-05	3.81018e-05	0.000228611	0.000200034	5.71527e-05	0.000228611	0.000114305	0.000114305	0.000171458	0.000171458	5.71527e-05	0.000171458	0.000114305	0.000285763	5.71527e-05	0	0.000171458	0	5.71527e-05	0	0	0	0	5.71527e-05	0.000114305	5.71527e-05	0	0.000114305	0.000285763	5.71527e-05	0.000171458	0.000742985	0.000114305	0.000400069	5.71527e-05	0.000228611
Otu00582	Bacteria;Firmicutes;Clostridia;Clostridiales;Lachnospiraceae;Clostridium XlVb	Firmicutes	Clostridia	Clostridiales	Lachnospiraceae	Clostridium XlVb	0.000142428	M06047_81_000000000CBLT5_1_1105_14463_10623	7.62035e-05	0.00010478	8.5729e-05	7.62035e-05	0.000142882	0.000200034	5.71527e-05	0.000171458	0	0	0.000171458	5.71527e-05	0.000171458	5.71527e-05	5.71527e-05	0.000228611	0	0.000114305	0.000285763	5.71527e-05	0	0	0	5.71527e-05	0	0	0.000400069	0	0.000171458	5.71527e-05	0.000171458	0	0.000285763	0.000171458	0.000228611	5.71527e-05	0.000342916	0.000171458
Otu00583	Bacteria;Firmicutes;Clostridia;Clostridiales;Ruminococcaceae;unclassified_Ruminococcaceae	Firmicutes	Clostridia	Clostridiales	Ruminococcaceae	unclassified_Ruminococcaceae	0.000141521	M06047_81_000000000CBLT5_1_2114_9518_21625	0.000152407	0.000142882	1.42882e-05	0	2.85763e-05	4.28645e-05	5.71527e-05	0	0.000228611	5.71527e-05	0.000171458	0.000400069	0	0.000228611	0.000114305	0.000114305	0.000114305	0.000285763	5.71527e-05	0	0	0	0	0	0	0	0	0	0	0.000114305	5.71527e-05	0	0	0	0.000171458	0	0	0
Otu00584	Bacteria;Fusobacteria;Fusobacteriia;Fusobacteriales;Fusobacteriaceae;Fusobacterium	Fusobacteria	Fusobacteriia	Fusobacteriales	Fusobacteriaceae	Fusobacterium	0.000140614	M06047_81_000000000CBLT5_1_1102_21317_4745	4.76272e-05	0.00010478	0.000185746	0.000485798	2.85763e-05	0.000200034	5.71527e-05	0	0.000171458	0	5.71527e-05	0	0	0.000571527	5.71527e-05	0	0	0	0.000285763	0	0.000457221	0	0.00114305	0.0010859	0.000514374	0.000114305	0	5.71527e-05	0	0.000114305	0	0	0	5.71527e-05	0	0	0	0.000800137
Otu00585	Bacteria;Proteobacteria;Alphaproteobacteria;Rhodobacterales;Rhodobacteraceae;unclassified_Rhodobacteraceae	Proteobacteria	Alphaproteobacteria	Rhodobacterales	Rhodobacteraceae	unclassified_Rhodobacteraceae	0.000138799	M06047_81_000000000CBLT5_1_2113_8091_21696	3.81018e-05	1.90509e-05	0	3.81018e-05	3.81018e-05	0	0	0	0	0.000171458	5.71527e-05	0	0	5.71527e-05	0	5.71527e-05	0	0	0	0	0	0	0.000171458	5.71527e-05	0	0	0	0	0.000228611	0	0	0	0	0	0	0	0	0
Otu00586	Bacteria;Firmicutes;Clostridia;Clostridiales;Lachnospiraceae;unclassified_Lachnospiraceae	Firmicutes	Clostridia	Clostridiales	Lachnospiraceae	unclassified_Lachnospiraceae	0.000137892	M01394_160_000000000C9RJW_1_1102_9026_14765	0	0	0	0.00031434	0.000409594	0.000185746	0	0	0	0	0	0	0	0	0	0	0	0	0	0	0	0	0	0	0.000228611	0	0.000457221	0.00120021	0	0	0.000514374	0	0.00125736	0.000685832	0	0.000514374	0.000228611	0
Otu00587	Bacteria;Firmicutes;Clostridia;Clostridiales;Lachnospiraceae;unclassified_Lachnospiraceae	Firmicutes	Clostridia	Clostridiales	Lachnospiraceae	unclassified_Lachnospiraceae	0.000137892	C70117_71_000000000C45C2_1_1102_3781_16987	0.000123831	0	0	0.000228611	0.000228611	0.000171458	0	0	0.000571527	5.71527e-05	0.000114305	0	0	0	0	0	0	0	0	0	0	0	0	0	0.000114305	0	0.00114305	0.000114305	0	0	0.000628679	0	0.000285763	0.000457221	0	0.000228611	0.000457221	0
Otu00588	Bacteria;Bacteroidetes;Bacteroidia;Bacteroidales;Porphyromonadaceae;unclassified_Porphyromonadaceae	Bacteroidetes	Bacteroidia	Bacteroidales	Porphyromonadaceae	unclassified_Porphyromonadaceae	0.000137892	M06047_81_000000000CBLT5_1_1116_13983_10065	0.00031434	0.000342916	0	5.71527e-05	0.000257187	1.42882e-05	5.71527e-05	0.000285763	5.71527e-05	0	0.0010859	0.000400069	0	0.000171458	0.000171458	0.00142882	0.000114305	0.000171458	0	0	0	0	0	0.000228611	0	0	0	0.000114305	0	0.000171458	0.000971595	0.000114305	0.000171458	0.000114305	0	0	5.71527e-05	0
Otu00589	Bacteria;unclassified_Bacteria;;;;	unclassified_Bacteria					0.000136985	M06047_81_000000000CBLT5_1_2109_9108_4541	0.000161933	0.000428645	0.000100017	0.000152407	0.00010478	0.00015717	5.71527e-05	0.000171458	0.000114305	0.000342916	0.000114305	0.000171458	0.000971595	0.00085729	0.000114305	0.000171458	0.000285763	0.000171458	0.000171458	5.71527e-05	0	0.000171458	0.000171458	0	0.000400069	0.000171458	0.000171458	0	0.000171458	0.000114305	0.000171458	0.000171458	0	0	0.000514374	5.71527e-05	0	5.71527e-05
Otu00590	Bacteria;Firmicutes;Clostridia;Clostridiales;unclassified_Clostridiales;	Firmicutes	Clostridia	Clostridiales	unclassified_Clostridiales		0.000136985	M06047_81_000000000CBLT5_1_1110_14031_9409	0.000142882	0.000504848	0.00015717	6.66781e-05	0.000161933	0.000114305	0.000171458	0	0.000285763	0.000228611	5.71527e-05	0.000114305	0.000400069	0.000514374	0.000800137	0	0.000457221	0.00085729	0.000171458	0.000171458	5.71527e-05	0.000228611	0.000171458	0	5.71527e-05	0.000171458	0	0	0.000228611	0.000228611	0	0.000457221	0	5.71527e-05	0.000342916	0	0	0.000114305
Otu00591	Bacteria;Proteobacteria;unclassified_Proteobacteria;;;	Proteobacteria	unclassified_Proteobacteria				0.000136078	M06047_81_000000000CBLT5_1_2107_24214_9279	0.000114305	1.90509e-05	0	9.52544e-06	5.71527e-05	0	0	0	0	0.000685832	0	0	0	0.000114305	0	0	0	0	0	0	0	0	0	5.71527e-05	0	0	0	0	0.000342916	0	0	0	0	0	0	0	0	0
Otu00592	Bacteria;Actinobacteria;Actinobacteria;Coriobacteriales;Coriobacteriaceae;unclassified_Coriobacteriaceae	Actinobacteria	Actinobacteria	Coriobacteriales	Coriobacteriaceae	unclassified_Coriobacteriaceae	0.000135171	M06047_81_000000000CBLT5_1_1101_7263_17632	0.000295289	7.62035e-05	4.28645e-05	0.000123831	1.90509e-05	2.85763e-05	0	5.71527e-05	0.000114305	0.00142882	0	0.000171458	5.71527e-05	0	0.000171458	0.000114305	5.71527e-05	5.71527e-05	0	0.000114305	0	5.71527e-05	0.000114305	0.000457221	5.71527e-05	0.000114305	0	0	5.71527e-05	0	0	5.71527e-05	0	0	5.71527e-05	0	0	5.71527e-05
Otu00593	Bacteria;Firmicutes;Erysipelotrichia;Erysipelotrichales;Erysipelotrichaceae;Erysipelotrichaceae_incertae_sedis	Firmicutes	Erysipelotrichia	Erysipelotrichales	Erysipelotrichaceae	Erysipelotrichaceae_incertae_sedis	0.000135171	C70117_71_000000000C45C2_1_2117_17175_9126	0.000466747	5.71527e-05	7.14408e-05	9.52544e-06	1.90509e-05	0	0	0.000685832	0.000228611	0.000342916	0.000571527	0.000971595	0.000171458	0	0	5.71527e-05	0	0.000114305	0.000285763	0	0	0	0	0	0	5.71527e-05	0	0	0	0	5.71527e-05	0	0	5.71527e-05	0	0	0	0
Otu00594	Bacteria;Firmicutes;Clostridia;Clostridiales;Ruminococcaceae;Oscillibacter	Firmicutes	Clostridia	Clostridiales	Ruminococcaceae	Oscillibacter	0.000134263	M06047_81_000000000CBLT5_1_1102_4991_6956	0.000152407	6.66781e-05	5.71527e-05	9.52544e-05	0.000285763	0.000200034	0.000171458	0.000114305	0.000171458	0	0.000228611	0.000228611	0.000228611	0.000114305	0	5.71527e-05	0	0	0.000114305	5.71527e-05	5.71527e-05	0	0	0	5.71527e-05	0.000285763	5.71527e-05	0.000171458	0.000171458	0	0.000171458	5.71527e-05	0.000114305	0.00120021	0.000114305	0.000400069	5.71527e-05	0.000228611
Otu00595	Bacteria;Firmicutes;Clostridia;Clostridiales;Lachnospiraceae;Lachnospiracea_incertae_sedis	Firmicutes	Clostridia	Clostridiales	Lachnospiraceae	Lachnospiracea_incertae_sedis	0.000134263	C70117_71_000000000C45C2_1_2107_2826_17769	0.000266712	0.000352441	0	3.81018e-05	0.00010478	1.42882e-05	0.000114305	0	0.000171458	0	0.00131451	0	0.000285763	0	0.000114305	0.00160027	5.71527e-05	5.71527e-05	0	0	0	0	0	0	0	0.000228611	0	0	5.71527e-05	0.000228611	0	5.71527e-05	0	0.000285763	0	5.71527e-05	0	0
Otu00596	Bacteria;Firmicutes;Clostridia;Clostridiales;unclassified_Clostridiales;	Firmicutes	Clostridia	Clostridiales	unclassified_Clostridiales		0.000132449	M06047_81_000000000CBLT5_1_1103_27891_12333	0.000171458	0.000133356	2.85763e-05	0.000114305	8.5729e-05	0.00015717	0.000114305	5.71527e-05	0.000400069	0	0.000228611	0.000228611	0.000114305	0.000285763	0	0	0.000342916	5.71527e-05	5.71527e-05	0	0	5.71527e-05	5.71527e-05	0	0.000285763	0.000228611	5.71527e-05	5.71527e-05	0	5.71527e-05	0.000228611	5.71527e-05	0.000114305	5.71527e-05	0.000228611	0.000114305	0.000114305	0.000171458
Otu00597	Bacteria;Proteobacteria;Gammaproteobacteria;Pasteurellales;Pasteurellaceae;unclassified_Pasteurellaceae	Proteobacteria	Gammaproteobacteria	Pasteurellales	Pasteurellaceae	unclassified_Pasteurellaceae	0.000131542	M06047_81_000000000CBLT5_1_2118_4749_10817	0.000200034	3.81018e-05	0.000328628	0.000257187	3.81018e-05	0.000114305	5.71527e-05	0	0.00085729	0.000171458	0.000114305	0	5.71527e-05	0.000114305	5.71527e-05	0	0	0	5.71527e-05	5.71527e-05	0.00120021	0	0.000742985	0.000457221	5.71527e-05	5.71527e-05	0.000114305	0.000114305	0	0	0.000171458	0	0	5.71527e-05	5.71527e-05	0	0	0.000400069
Otu00598	Bacteria;Firmicutes;Clostridia;Clostridiales;Ruminococcaceae;Oscillibacter	Firmicutes	Clostridia	Clostridiales	Ruminococcaceae	Oscillibacter	0.000129727	M06047_81_000000000CBLT5_1_1113_9687_6523	0.000114305	0.000123831	2.85763e-05	7.62035e-05	0.000219085	0.000185746	5.71527e-05	0.000171458	5.71527e-05	0.000285763	5.71527e-05	5.71527e-05	0.000114305	0.000400069	0.000171458	5.71527e-05	0	0	0	0.000114305	0	0	0	0	0.000171458	0	0.000114305	0.000171458	0	0.000228611	5.71527e-05	0.000171458	0.000114305	0.000742985	0	0.000171458	0.000285763	0.000285763
Otu00599	Bacteria;Firmicutes;Clostridia;Clostridiales;Lachnospiraceae;unclassified_Lachnospiraceae	Firmicutes	Clostridia	Clostridiales	Lachnospiraceae	unclassified_Lachnospiraceae	0.00012882	M03062_107_000000000CBKND_1_2115_14650_14401	9.52544e-06	0.000114305	0	0.00010478	0.000657256	0.000457221	5.71527e-05	0	0	0	0	0	0.000114305	0.000571527	0	0	0	0	0	0	0	0	0	0	0.000171458	5.71527e-05	0.000400069	0	0	0	5.71527e-05	0	0.00268617	0.00120021	0	0.00125736	0.000571527	0
Otu00600	Bacteria;Firmicutes;Clostridia;Clostridiales;Lachnospiraceae;unclassified_Lachnospiraceae	Firmicutes	Clostridia	Clostridiales	Lachnospiraceae	unclassified_Lachnospiraceae	0.00012882	M06047_81_000000000CBLT5_1_2115_17791_15520	0.00033339	0.000247662	0	2.85763e-05	6.66781e-05	0.000471509	0	0.000171458	0	0	0.00120021	0.000628679	5.71527e-05	0	0	0.00114305	5.71527e-05	0.000228611	0	0	0	0	0	0	0	5.71527e-05	0	0.000114305	0	5.71527e-05	0.000114305	0	0	0.000228611	0	0.00182888	5.71527e-05	0
Otu00601	Bacteria;Firmicutes;Clostridia;Clostridiales;Ruminococcaceae;Ruminococcus	Firmicutes	Clostridia	Clostridiales	Ruminococcaceae	Ruminococcus	0.00012882	C70117_71_000000000C45C2_1_1106_20318_9805	0.00010478	3.81018e-05	0.000185746	1.90509e-05	0.00010478	7.14408e-05	0	0.000571527	0	0	5.71527e-05	0	0	5.71527e-05	0	0	0.000171458	0	0.000114305	0.000571527	5.71527e-05	0	0	5.71527e-05	0	0	5.71527e-05	0	0	0	0	0.000628679	0	0	5.71527e-05	0	5.71527e-05	0.000171458
Otu00602	Bacteria;Firmicutes;Clostridia;Clostridiales;Ruminococcaceae;Intestinimonas	Firmicutes	Clostridia	Clostridiales	Ruminococcaceae	Intestinimonas	0.00012882	M06047_81_000000000CBLT5_1_1115_22018_21137	0.000161933	4.76272e-05	5.71527e-05	0.000171458	7.62035e-05	0.000214322	0	0.000400069	0.000171458	5.71527e-05	0.000228611	0.000114305	5.71527e-05	0.000114305	0	5.71527e-05	0	5.71527e-05	0	0.000228611	0	0	0.000342916	0.000171458	0.000114305	0.000171458	0.000171458	5.71527e-05	5.71527e-05	5.71527e-05	5.71527e-05	0.000114305	0.000171458	0	0.000285763	0.000171458	0.000228611	0.000171458
Otu00603	Bacteria;Firmicutes;Clostridia;Clostridiales;Ruminococcaceae;Hydrogenoanaerobacterium	Firmicutes	Clostridia	Clostridiales	Ruminococcaceae	Hydrogenoanaerobacterium	0.000127006	C70117_71_000000000C45C2_1_1113_20198_6374	5.71527e-05	4.76272e-05	0.000100017	0.000152407	0.000123831	0.000242899	0	0.000114305	5.71527e-05	0	5.71527e-05	0.000114305	0	0	0.000171458	0	0	0.000114305	0.000114305	5.71527e-05	5.71527e-05	0.000171458	5.71527e-05	0	0.000342916	0	0.000342916	0.000171458	5.71527e-05	5.71527e-05	0.000171458	0	0.000285763	0.000171458	0.000114305	0.000285763	0.000457221	0.000114305
Otu00604	Bacteria;Firmicutes;Clostridia;Clostridiales;Lachnospiraceae;unclassified_Lachnospiraceae	Firmicutes	Clostridia	Clostridiales	Lachnospiraceae	unclassified_Lachnospiraceae	0.000126099	M03062_107_000000000CBKND_1_2105_25619_20997	0.000171458	0.000304814	0.000128593	4.76272e-05	0.000142882	5.71527e-05	5.71527e-05	0.000742985	0	0	0.000228611	0	0	0.000114305	0.000171458	0.000285763	0.00125736	0	5.71527e-05	0.000400069	5.71527e-05	0	0.000171458	0.000114305	0	0	0	0	5.71527e-05	0	0	0.000800137	0	0	0	0	0	0.000228611
Otu00605	Bacteria;Firmicutes;Clostridia;Clostridiales;Ruminococcaceae;unclassified_Ruminococcaceae	Firmicutes	Clostridia	Clostridiales	Ruminococcaceae	unclassified_Ruminococcaceae	0.000126099	M06047_81_000000000CBLT5_1_2116_26918_17378	0.000552476	9.52544e-06	2.85763e-05	2.85763e-05	9.52544e-05	0	0	0.00297194	5.71527e-05	0.000114305	0.000171458	0	0	0	0	0	0	5.71527e-05	0.000114305	0	0	0	0	0	0.000114305	5.71527e-05	0	0	0	0	0	0	0	0.000571527	0	0	0	0
Otu00606	Bacteria;Firmicutes;unclassified_Firmicutes;;;	Firmicutes	unclassified_Firmicutes				0.000125192	C70117_71_000000000C45C2_1_1110_6056_11856	0.000133356	7.62035e-05	1.42882e-05	0.000161933	6.66781e-05	2.85763e-05	0.000114305	0.000114305	0	5.71527e-05	0.000342916	0.000171458	0	0.000171458	0.000114305	0.000114305	5.71527e-05	0	0	0	0	5.71527e-05	0.000171458	5.71527e-05	0.000114305	0.000400069	5.71527e-05	0.000171458	0	0	5.71527e-05	0.000114305	0.000171458	5.71527e-05	5.71527e-05	0	0	5.71527e-05
Otu00607	Bacteria;Firmicutes;Clostridia;Clostridiales;Lachnospiraceae;unclassified_Lachnospiraceae	Firmicutes	Clostridia	Clostridiales	Lachnospiraceae	unclassified_Lachnospiraceae	0.000125192	M03062_107_000000000CBKND_1_1119_18017_9662	9.52544e-06	6.66781e-05	4.28645e-05	0	0.000133356	0	0	0	0	0	5.71527e-05	0	0	0.000285763	0	5.71527e-05	0	5.71527e-05	5.71527e-05	5.71527e-05	0	5.71527e-05	0	0	0	0	0	0	0	0.000800137	0	0	0	0	0	0	0	0
Otu00608	Bacteria;Proteobacteria;Alphaproteobacteria;Rhodospirillales;Rhodospirillaceae;unclassified_Rhodospirillaceae	Proteobacteria	Alphaproteobacteria	Rhodospirillales	Rhodospirillaceae	unclassified_Rhodospirillaceae	0.000125192	M06047_81_000000000CBLT5_1_2116_23193_3813	4.76272e-05	0.000200034	0.000200034	0.000142882	0.000200034	0.000214322	0.000114305	0	0.000114305	0	0	5.71527e-05	5.71527e-05	0.000114305	0.000971595	0	5.71527e-05	0	0.000457221	0.000114305	0	0.000228611	0	5.71527e-05	5.71527e-05	5.71527e-05	0.000628679	5.71527e-05	0	0.000342916	5.71527e-05	0.000400069	0.000342916	5.71527e-05	0.000228611	0.000457221	5.71527e-05	0.000114305
Otu00609	Bacteria;Firmicutes;Negativicutes;Selenomonadales;Veillonellaceae;Megamonas	Firmicutes	Negativicutes	Selenomonadales	Veillonellaceae	Megamonas	0.000125192	C70117_71_000000000C45C2_1_1107_12833_4902	0.000133356	9.52544e-05	0.000814425	0	1.90509e-05	2.85763e-05	0	0.000400069	0	0	0.000400069	0	0	0	0	0.000457221	0.000114305	0	0.00154312	0.00160027	5.71527e-05	5.71527e-05	0	0	0	0	0	0	0	0	0	0.000114305	0	0	0.000114305	0	0	0
Otu00610	Bacteria;Firmicutes;Clostridia;Clostridiales;Lachnospiraceae;unclassified_Lachnospiraceae	Firmicutes	Clostridia	Clostridiales	Lachnospiraceae	unclassified_Lachnospiraceae	0.000125192	M01394_160_000000000C9RJW_1_2110_23253_8608	0	0	0	0.000295289	0.000295289	0.000114305	0	0	0	0	0	0	0	0	0	0	0	0	0	0	0	0	0	0	5.71527e-05	0	0.00142882	0.000285763	0	0	0.000457221	0	0.00102875	0.000285763	5.71527e-05	0.000228611	0.000171458	0
Otu00611	Bacteria;Firmicutes;Clostridia;Clostridiales;Ruminococcaceae;unclassified_Ruminococcaceae	Firmicutes	Clostridia	Clostridiales	Ruminococcaceae	unclassified_Ruminococcaceae	0.000123377	M06047_81_000000000CBLT5_1_2111_27755_13905	0.00020956	9.52544e-05	2.85763e-05	6.66781e-05	8.5729e-05	1.42882e-05	0.000228611	0	0.000228611	0.000171458	0.000342916	0.000285763	0.000114305	5.71527e-05	0.000171458	5.71527e-05	0.000171458	0	5.71527e-05	0	0	5.71527e-05	5.71527e-05	5.71527e-05	5.71527e-05	0.000114305	5.71527e-05	5.71527e-05	0.000171458	0.000171458	5.71527e-05	5.71527e-05	0	5.71527e-05	5.71527e-05	0	0	0
Otu00612	Bacteria;Firmicutes;Clostridia;Clostridiales;Lachnospiraceae;unclassified_Lachnospiraceae	Firmicutes	Clostridia	Clostridiales	Lachnospiraceae	unclassified_Lachnospiraceae	0.000123377	M06047_81_000000000CBLT5_1_1116_15269_11573	9.52544e-06	0.0010478	0.000228611	0	1.90509e-05	0	0	0	0	0	5.71527e-05	0	5.71527e-05	0.00085729	0	0.000228611	0.00508659	5.71527e-05	0	0	0	0.000914442	0	0	0	0	0	0	0	5.71527e-05	0	5.71527e-05	0	0	0	0	0	0
Otu00613	Bacteria;Firmicutes;unclassified_Firmicutes;;;	Firmicutes	unclassified_Firmicutes				0.00012247	M06047_81_000000000CBLT5_1_2109_21538_7529	7.62035e-05	0.000123831	0	0.000400069	7.62035e-05	5.71527e-05	0	5.71527e-05	0	0.000171458	0.000114305	0.000114305	0.000228611	0.000171458	0.000114305	0.000171458	5.71527e-05	0	0	0	0	0	0	0	0.000914442	0.00114305	0	0.000342916	5.71527e-05	0.000171458	0.000171458	0	0	5.71527e-05	0.000114305	0	5.71527e-05	5.71527e-05
Otu00614	Bacteria;unclassified_Bacteria;;;;	unclassified_Bacteria					0.00012247	M03062_107_000000000CBKND_1_2118_23180_19239	0.00010478	2.85763e-05	1.42882e-05	9.52544e-05	9.52544e-05	8.5729e-05	0	0	0	5.71527e-05	5.71527e-05	0.000514374	5.71527e-05	5.71527e-05	5.71527e-05	0	0	0	0	0	0	5.71527e-05	0	0	0	0.000571527	0	0	0	0.000114305	5.71527e-05	0	0.000285763	0.000114305	0	0.000114305	0.000171458	5.71527e-05
Otu00615	Bacteria;Bacteroidetes;Bacteroidia;Bacteroidales;Rikenellaceae;Alistipes	Bacteroidetes	Bacteroidia	Bacteroidales	Rikenellaceae	Alistipes	0.00012247	M06047_81_000000000CBLT5_1_1114_7687_18853	8.5729e-05	8.5729e-05	5.71527e-05	0.000485798	2.85763e-05	1.42882e-05	0.000114305	0	0.000228611	0.000171458	0	0	0	5.71527e-05	0.000228611	0	0.000114305	0.000114305	0.000114305	0	0	0.000114305	0.000685832	0.000457221	0.000685832	0.000457221	5.71527e-05	0.000571527	5.71527e-05	0	0	5.71527e-05	0	5.71527e-05	5.71527e-05	0	0	0
Otu00616	Bacteria;Proteobacteria;Alphaproteobacteria;Rhodospirillales;Rhodospirillaceae;unclassified_Rhodospirillaceae	Proteobacteria	Alphaproteobacteria	Rhodospirillales	Rhodospirillaceae	unclassified_Rhodospirillaceae	0.00012247	M06047_81_000000000CBLT5_1_2105_26419_12983	5.71527e-05	0.000219085	8.5729e-05	0.000133356	1.90509e-05	0.000514374	5.71527e-05	0	0	0	0	0.000285763	0.000114305	0	0.00085729	0.000171458	0.000171458	0	0.000171458	0	0.000114305	5.71527e-05	0	0	5.71527e-05	0.000171458	0	0.000571527	0	0	0	0	0.000114305	0	0	0.000171458	0.00154312	0.000342916
Otu00617	Bacteria;Firmicutes;Clostridia;Clostridiales;Ruminococcaceae;unclassified_Ruminococcaceae	Firmicutes	Clostridia	Clostridiales	Ruminococcaceae	unclassified_Ruminococcaceae	0.000121563	M06047_81_000000000CBLT5_1_1114_21480_17616	0.00010478	0.000114305	4.28645e-05	8.5729e-05	0.000180983	0.000171458	0.000114305	0.000114305	0.000171458	5.71527e-05	0	0.000171458	0.000228611	5.71527e-05	0.000114305	0.000171458	0	0.000114305	0	0	0.000114305	5.71527e-05	0	0	0	0	0.000342916	0.000171458	0.000114305	0.000171458	0.000171458	5.71527e-05	0.000285763	0.000285763	0	0.000342916	0.000228611	0.000114305
Otu00618	Bacteria;Firmicutes;Clostridia;Clostridiales;Ruminococcaceae;unclassified_Ruminococcaceae	Firmicutes	Clostridia	Clostridiales	Ruminococcaceae	unclassified_Ruminococcaceae	0.000121563	M06047_81_000000000CBLT5_1_2115_21842_11103	3.81018e-05	0.000419119	5.71527e-05	0.000171458	0.000342916	0	0	5.71527e-05	0.000114305	0	5.71527e-05	0	5.71527e-05	0	0.000114305	0	0.000114305	0.00222895	5.71527e-05	0.000114305	0	5.71527e-05	0.000285763	0.000285763	5.71527e-05	0.000285763	5.71527e-05	5.71527e-05	0.00177173	0.000114305	0	0.000171458	0	0	0	0	0	0
Otu00619	Bacteria;Firmicutes;Clostridia;Clostridiales;Ruminococcaceae;Clostridium IV	Firmicutes	Clostridia	Clostridiales	Ruminococcaceae	Clostridium IV	0.000120656	C70117_71_000000000C45C2_1_2109_13551_3488	0.000285763	6.66781e-05	5.71527e-05	4.76272e-05	0.000123831	2.85763e-05	0	0.000800137	0.000114305	0	0.000457221	0.000342916	0.000342916	0	0	5.71527e-05	0	0	0.000171458	0	5.71527e-05	0	5.71527e-05	0	5.71527e-05	0.000114305	0	5.71527e-05	0	5.71527e-05	0	0	5.71527e-05	0.000628679	0	0.000114305	0	0
Otu00620	Bacteria;Proteobacteria;Alphaproteobacteria;Rhodobacterales;Rhodobacteraceae;unclassified_Rhodobacteraceae	Proteobacteria	Alphaproteobacteria	Rhodobacterales	Rhodobacteraceae	unclassified_Rhodobacteraceae	0.000120656	M06047_81_000000000CBLT5_1_2111_23682_10544	4.76272e-05	2.85763e-05	0	0	0	0	0	0	0	0.000228611	5.71527e-05	0	0	0	0	0.000171458	0	0	0	0	0	0	0	0	0	0	0	0	0	0	0	0	0	0	0	0	0	0
Otu00621	Bacteria;Firmicutes;unclassified_Firmicutes;;;	Firmicutes	unclassified_Firmicutes				0.000120656	C70117_71_000000000C45C2_1_2104_12962_17378	0.000171458	0.000133356	0.000114305	1.90509e-05	2.85763e-05	0.000142882	0.000228611	5.71527e-05	0.000285763	0.000342916	0.000114305	0	0	0.000171458	0.000285763	0.000285763	5.71527e-05	0	0.000457221	0	0	0	0	0	0	0	0.000114305	0	0	0.000114305	5.71527e-05	0	0	0	0.000400069	5.71527e-05	0	0.000114305
Otu00622	Bacteria;Firmicutes;Clostridia;Clostridiales;Lachnospiraceae;unclassified_Lachnospiraceae	Firmicutes	Clostridia	Clostridiales	Lachnospiraceae	unclassified_Lachnospiraceae	0.000119748	M06047_81_000000000CBLT5_1_2102_23267_7204	0.000152407	0.000152407	0	0.000219085	0.000180983	0.00031434	0.000114305	0.000228611	0.000114305	0	0.000400069	5.71527e-05	0	0.000571527	5.71527e-05	0.000285763	0	0	0	0	0	0	0.000171458	5.71527e-05	5.71527e-05	0.000228611	0	0.000800137	0.000114305	5.71527e-05	5.71527e-05	0	0.000800137	5.71527e-05	0.000171458	5.71527e-05	0.000971595	5.71527e-05
Otu00623	Bacteria;Firmicutes;Erysipelotrichia;Erysipelotrichales;Erysipelotrichaceae;Coprobacillus	Firmicutes	Erysipelotrichia	Erysipelotrichales	Erysipelotrichaceae	Coprobacillus	0.000119748	C70117_71_000000000C45C2_1_2101_13609_3955	0	8.5729e-05	0.001686	0	0	2.85763e-05	0	0	0	0	0	0	0	0	0	0	5.71527e-05	0.000457221	0.000342916	0.00628679	0	0.000114305	0	0	0	0	0	0	0	0	0	0	0	0	5.71527e-05	0	0	5.71527e-05
Otu00624	Bacteria;Firmicutes;Clostridia;Clostridiales;unclassified_Clostridiales;	Firmicutes	Clostridia	Clostridiales	unclassified_Clostridiales		0.000119748	M06047_81_000000000CBLT5_1_2102_12094_6426	0.000133356	6.66781e-05	2.85763e-05	0.00010478	0.000171458	0.000142882	5.71527e-05	0.000285763	0	0	0.000114305	0.000342916	0	0	0.000114305	5.71527e-05	5.71527e-05	0.000171458	5.71527e-05	5.71527e-05	0	0	5.71527e-05	0.000114305	0.000114305	0	0.000285763	5.71527e-05	0.000114305	0.000285763	0.000114305	0.000114305	0.000342916	5.71527e-05	5.71527e-05	0.000285763	0.000114305	0.000114305
Otu00625	Bacteria;Firmicutes;Clostridia;Clostridiales;Lachnospiraceae;unclassified_Lachnospiraceae	Firmicutes	Clostridia	Clostridiales	Lachnospiraceae	unclassified_Lachnospiraceae	0.000117934	M06047_81_000000000CBLT5_1_2113_3058_12848	9.52544e-05	0.00010478	2.85763e-05	0.000371492	0.000295289	0.000185746	5.71527e-05	0.000114305	0	0.000171458	0.000171458	5.71527e-05	5.71527e-05	0.000228611	5.71527e-05	0.000285763	0	0	0	5.71527e-05	5.71527e-05	0	0	5.71527e-05	5.71527e-05	0.000114305	0.00137166	0.000628679	5.71527e-05	0.000228611	0.00102875	0	0	0.000457221	0	0.000171458	0	0.000571527
Otu00626	Bacteria;Firmicutes;Clostridia;Clostridiales;unclassified_Clostridiales;	Firmicutes	Clostridia	Clostridiales	unclassified_Clostridiales		0.000117934	C70117_71_000000000C45C2_1_1113_10039_13388	0.00010478	5.71527e-05	7.14408e-05	0.000123831	6.66781e-05	4.28645e-05	0	0.000228611	5.71527e-05	0	0.000171458	0.000171458	0	5.71527e-05	5.71527e-05	0	0.000171458	5.71527e-05	0	0.000114305	0	0.000171458	5.71527e-05	0.000114305	5.71527e-05	0.000114305	0.000171458	0.000228611	0	5.71527e-05	0.000114305	0.000114305	5.71527e-05	5.71527e-05	5.71527e-05	5.71527e-05	0	5.71527e-05
Otu00627	Bacteria;Firmicutes;Clostridia;Clostridiales;Lachnospiraceae;unclassified_Lachnospiraceae	Firmicutes	Clostridia	Clostridiales	Lachnospiraceae	unclassified_Lachnospiraceae	0.000117027	M06047_81_000000000CBLT5_1_1103_2720_12018	0.000400069	0.000409594	1.42882e-05	5.71527e-05	0.000276238	0	0.000285763	0.000571527	0	0.000114305	0.00120021	0.000228611	0.000114305	0.000285763	0.000228611	0.000971595	0.000114305	0.000742985	0	5.71527e-05	0	0	0.000114305	0	0	0.000171458	5.71527e-05	0	0.000571527	0.000514374	5.71527e-05	0.000457221	0	5.71527e-05	0	0	0	0
Otu00628	Bacteria;Firmicutes;Clostridia;Clostridiales;Ruminococcaceae;Butyricicoccus	Firmicutes	Clostridia	Clostridiales	Ruminococcaceae	Butyricicoccus	0.000117027	M06047_81_000000000CBLT5_1_2118_19888_14539	0.000180983	9.52544e-06	1.42882e-05	0.000257187	0.000200034	0.000257187	0	0.000171458	0.000285763	5.71527e-05	0.000171458	0.000400069	0	0	0	0	0	5.71527e-05	0	0	5.71527e-05	0	0	0	0.000457221	0	0.000457221	0.000628679	0	0.000285763	0.000342916	0	0.000457221	0.000114305	0.000342916	0.000228611	0.000400069	5.71527e-05
Otu00629	Bacteria;Firmicutes;Clostridia;Clostridiales;Lachnospiraceae;unclassified_Lachnospiraceae	Firmicutes	Clostridia	Clostridiales	Lachnospiraceae	unclassified_Lachnospiraceae	0.00011612	M06047_81_000000000CBLT5_1_1113_4573_6921	6.66781e-05	2.85763e-05	4.28645e-05	0.000171458	0.000342916	0.000285763	0	0.000171458	5.71527e-05	0	0.000171458	0	0.000114305	0	0	0	5.71527e-05	0	5.71527e-05	0	0.000114305	0	0	5.71527e-05	0.000171458	0	0.000628679	0.000171458	5.71527e-05	0	0.000628679	0	0.000685832	0.000685832	5.71527e-05	0.000971595	0	0.000114305
Otu00630	Bacteria;Firmicutes;Clostridia;Clostridiales;Lachnospiraceae;unclassified_Lachnospiraceae	Firmicutes	Clostridia	Clostridiales	Lachnospiraceae	unclassified_Lachnospiraceae	0.000115212	M06047_81_000000000CBLT5_1_2106_20762_9027	6.66781e-05	0.000123831	0	0.000171458	0.000133356	4.28645e-05	0	5.71527e-05	0.000171458	5.71527e-05	0	0.000114305	0.000685832	0	0	0	0	5.71527e-05	0	0	0	0	0.000228611	0.000800137	0	0	0	0	0	5.71527e-05	0	5.71527e-05	0.000685832	0	5.71527e-05	5.71527e-05	0	5.71527e-05
Otu00631	Bacteria;Bacteroidetes;Bacteroidia;Bacteroidales;Porphyromonadaceae;unclassified_Porphyromonadaceae	Bacteroidetes	Bacteroidia	Bacteroidales	Porphyromonadaceae	unclassified_Porphyromonadaceae	0.000114305	M01394_160_000000000C9RJW_1_1117_4556_14692	0.000161933	0.000171458	5.71527e-05	0.000247662	7.62035e-05	0.000114305	0	0.000171458	0	0	0.000400069	0.000400069	0	0.000114305	0.000457221	0.000400069	5.71527e-05	0	0	5.71527e-05	0.000114305	5.71527e-05	0	0.00085729	0.000342916	5.71527e-05	0.000114305	0.000114305	0	5.71527e-05	0.000400069	0	0	0	0.000171458	5.71527e-05	0.000171458	5.71527e-05
Otu00632	Bacteria;Proteobacteria;Deltaproteobacteria;unclassified_Deltaproteobacteria;;	Proteobacteria	Deltaproteobacteria	unclassified_Deltaproteobacteria			0.000114305	M06047_81_000000000CBLT5_1_2109_17288_18990	0.000171458	4.76272e-05	1.42882e-05	2.85763e-05	1.90509e-05	0.000185746	0.000171458	0	0	0.00085729	0	0	5.71527e-05	0	0.000171458	0	5.71527e-05	0	0	5.71527e-05	0	0	0	5.71527e-05	0	0	0.000114305	0	0	0.000114305	0	0	0	0	5.71527e-05	0.000285763	0.000400069	0
Otu00633	Bacteria;Firmicutes;Clostridia;Clostridiales;Lachnospiraceae;unclassified_Lachnospiraceae	Firmicutes	Clostridia	Clostridiales	Lachnospiraceae	unclassified_Lachnospiraceae	0.000113398	M06047_81_000000000CBLT5_1_1117_14321_15064	0.000180983	0.000219085	7.14408e-05	0.000114305	0.000152407	4.28645e-05	0	0.000742985	0	0	0.000342916	0	0	0.000228611	0.000285763	5.71527e-05	0.000742985	0	0	0.000285763	0	0	0.000685832	0	0	0	0	0	0.000171458	0	0	0.000742985	0	0	0	0	0	0.000171458
Otu00634	Bacteria;Firmicutes;Clostridia;Clostridiales;Ruminococcaceae;unclassified_Ruminococcaceae	Firmicutes	Clostridia	Clostridiales	Ruminococcaceae	unclassified_Ruminococcaceae	0.000113398	M06047_81_000000000CBLT5_1_2103_25149_13808	0.000142882	3.81018e-05	1.42882e-05	4.76272e-05	5.71527e-05	8.5729e-05	0.000114305	0.000171458	0.000171458	0	0.000342916	5.71527e-05	5.71527e-05	0.000114305	0	0	0	5.71527e-05	0	0	0	5.71527e-05	0	0	5.71527e-05	0	0.000171458	5.71527e-05	5.71527e-05	5.71527e-05	5.71527e-05	0	5.71527e-05	0.000114305	0	0.000228611	0.000114305	0
Otu00635	Bacteria;Firmicutes;Clostridia;Clostridiales;Ruminococcaceae;unclassified_Ruminococcaceae	Firmicutes	Clostridia	Clostridiales	Ruminococcaceae	unclassified_Ruminococcaceae	0.000113398	C70117_71_000000000C45C2_1_1108_12251_23469	9.52544e-05	4.76272e-05	8.5729e-05	7.62035e-05	0.00010478	0.000114305	0	5.71527e-05	0	5.71527e-05	0.000114305	0.000342916	0	0.000114305	5.71527e-05	5.71527e-05	0	5.71527e-05	5.71527e-05	0.000114305	0	0.000171458	0	0	0	0.000171458	0.000171458	0.000114305	0.000114305	0	5.71527e-05	5.71527e-05	0.000342916	5.71527e-05	0.000114305	0.000285763	5.71527e-05	0
Otu00636	Bacteria;Firmicutes;Clostridia;Clostridiales;Ruminococcaceae;Butyricicoccus	Firmicutes	Clostridia	Clostridiales	Ruminococcaceae	Butyricicoccus	0.000112491	M03062_107_000000000CBKND_1_2119_14508_6289	0.000190509	0.000133356	7.14408e-05	0.000190509	0.000180983	0.000100017	0.000114305	0.000228611	0	5.71527e-05	0.000342916	0.000400069	0.000114305	0.000228611	0.000228611	0.000114305	0	0.000114305	0	0.000171458	5.71527e-05	5.71527e-05	0.000228611	0	5.71527e-05	0.000342916	0.000400069	0.000114305	5.71527e-05	0.000171458	0.000285763	0.000114305	0.000228611	0.000228611	0	0.000228611	0.000171458	0
Otu00637	Bacteria;Tenericutes;Mollicutes;Mycoplasmatales;Mycoplasmataceae;Mycoplasma	Tenericutes	Mollicutes	Mycoplasmatales	Mycoplasmataceae	Mycoplasma	0.000112491	C70117_71_000000000C45C2_1_1113_20707_17602	1.90509e-05	9.52544e-06	0.000814425	9.52544e-06	9.52544e-06	2.85763e-05	0	0	0	0	0	0.000114305	0	5.71527e-05	0	0	0	0	0.000114305	0.00240041	0.000514374	0.000228611	0	5.71527e-05	0	0	0	0	5.71527e-05	0	0	0	0	0	0.000114305	0	0	0
Otu00638	Bacteria;Firmicutes;Clostridia;Clostridiales;Ruminococcaceae;unclassified_Ruminococcaceae	Firmicutes	Clostridia	Clostridiales	Ruminococcaceae	unclassified_Ruminococcaceae	0.000112491	M03062_107_000000000CBKND_1_1105_16807_20739	1.90509e-05	0.000114305	0.000814425	0	0	1.42882e-05	0	5.71527e-05	0	0	5.71527e-05	0	0	0.000114305	0.000114305	0	0.000400069	5.71527e-05	0.00245756	0.000285763	5.71527e-05	0.000457221	0	0	0	0	0	0	0	0	0	0	0	0	0	0	0	5.71527e-05
Otu00639	Bacteria;Actinobacteria;Actinobacteria;Actinomycetales;Actinomycetaceae;Actinomyces	Actinobacteria	Actinobacteria	Actinomycetales	Actinomycetaceae	Actinomyces	0.000111584	M06047_81_000000000CBLT5_1_1106_19476_5188	8.5729e-05	2.85763e-05	0.000214322	0.000171458	9.52544e-06	0.000185746	5.71527e-05	0	5.71527e-05	0.000114305	5.71527e-05	0.000228611	0	0	5.71527e-05	5.71527e-05	0	5.71527e-05	0.000457221	0.000342916	5.71527e-05	0	0.000114305	0.000742985	0	0.000171458	0	0	0	5.71527e-05	0	0	0	0	0.000685832	0	0	5.71527e-05
Otu00640	Bacteria;Firmicutes;Clostridia;Clostridiales;Lachnospiraceae;unclassified_Lachnospiraceae	Firmicutes	Clostridia	Clostridiales	Lachnospiraceae	unclassified_Lachnospiraceae	0.000111584	M06047_81_000000000CBLT5_1_1113_16691_16406	5.71527e-05	2.85763e-05	1.42882e-05	0	0	0	0.000114305	0	0	0	0	0.000228611	5.71527e-05	0	0	5.71527e-05	5.71527e-05	0	0	5.71527e-05	0	0	0	0	0	0	0	0	0	0	0	0	0	0	0	0	0	0
Otu00641	Bacteria;Firmicutes;Clostridia;Clostridiales;Lachnospiraceae;Clostridium XlVa	Firmicutes	Clostridia	Clostridiales	Lachnospiraceae	Clostridium XlVa	0.000111584	M06047_81_000000000CBLT5_1_1101_15291_3167	8.5729e-05	0.000114305	7.14408e-05	6.66781e-05	0	4.28645e-05	5.71527e-05	0	0	0	0.000228611	0.000228611	0	0	0.000228611	0.000457221	0	0	5.71527e-05	0	0.000171458	5.71527e-05	5.71527e-05	5.71527e-05	0	0.000285763	0	0	0	0	0	0	0	0	5.71527e-05	0.000114305	0	0
Otu00642	Bacteria;Bacteroidetes;Sphingobacteriia;Sphingobacteriales;Rhodothermaceae;unclassified_Rhodothermaceae	Bacteroidetes	Sphingobacteriia	Sphingobacteriales	Rhodothermaceae	unclassified_Rhodothermaceae	0.000111584	M03062_118_000000000CKCW4_1_2116_26391_18439	0	0	0	0	0	0	0	0	0	0	0	0	0	0	0	0	0	0	0	0	0	0	0	0	0	0	0	0	0	0	0	0	0	0	0	0	0	0
Otu00643	Bacteria;Firmicutes;Clostridia;Clostridiales;Lachnospiraceae;unclassified_Lachnospiraceae	Firmicutes	Clostridia	Clostridiales	Lachnospiraceae	unclassified_Lachnospiraceae	0.000110677	M06047_81_000000000CBLT5_1_2113_7441_5191	0.000200034	0.000161933	0.00015717	9.52544e-06	8.5729e-05	0.000128593	0.000114305	0	0	0.000171458	0.000285763	0.000628679	0.000342916	0.000342916	0	0.000171458	0.000114305	0	0.000228611	0	0	0.000400069	5.71527e-05	0	0	0	0	0	0	0.000400069	5.71527e-05	0	0	5.71527e-05	0.000228611	0.000114305	5.71527e-05	0.000114305
Otu00644	Bacteria;Firmicutes;Clostridia;Clostridiales;Lachnospiraceae;unclassified_Lachnospiraceae	Firmicutes	Clostridia	Clostridiales	Lachnospiraceae	unclassified_Lachnospiraceae	0.000109769	M06047_81_000000000CBLT5_1_1101_22592_21196	0.000285763	0.000390543	0.000114305	0	4.76272e-05	0.000400069	0	0	0	0	0.000742985	0.000971595	0.000285763	0.000400069	0.000228611	0.00131451	5.71527e-05	5.71527e-05	5.71527e-05	0.000400069	0	0	0	0	0	0	0	0	0.000228611	0	0	0	0	5.71527e-05	0.00120021	0	0	0.000400069
Otu00645	Bacteria;Firmicutes;Clostridia;Clostridiales;Lachnospiraceae;unclassified_Lachnospiraceae	Firmicutes	Clostridia	Clostridiales	Lachnospiraceae	unclassified_Lachnospiraceae	0.000109769	M06047_81_000000000CBLT5_1_2114_11980_8778	7.62035e-05	7.62035e-05	4.28645e-05	0.000180983	0.000142882	0.000185746	5.71527e-05	0.000114305	0.000114305	5.71527e-05	0	0.000114305	0.000171458	5.71527e-05	5.71527e-05	5.71527e-05	0.000114305	0	0	0	0.000114305	5.71527e-05	0.000171458	5.71527e-05	5.71527e-05	5.71527e-05	0.000171458	0.000571527	0.000228611	0	0	0	0.000285763	0.000342916	0	0.000228611	0.000400069	0.000114305
Otu00646	Bacteria;Proteobacteria;Alphaproteobacteria;Rhodobacterales;Rhodobacteraceae;Roseicyclus	Proteobacteria	Alphaproteobacteria	Rhodobacterales	Rhodobacteraceae	Roseicyclus	0.000108862	M06047_81_000000000CBLT5_1_1101_18312_10312	0	3.81018e-05	0	0	0	0	0	0	0	0	0	0	0	0	0	0.000228611	0	0	0	0	0	0	0	0	0	0	0	0	0	0	0	0	0	0	0	0	0	0
Otu00647	Bacteria;Bacteroidetes;Bacteroidia;Bacteroidales;Porphyromonadaceae;unclassified_Porphyromonadaceae	Bacteroidetes	Bacteroidia	Bacteroidales	Porphyromonadaceae	unclassified_Porphyromonadaceae	0.000108862	M06047_81_000000000CBLT5_1_1102_3952_13327	0.000123831	0.000133356	2.85763e-05	0.000161933	0.000180983	0.000100017	0	0.000228611	0	5.71527e-05	0.000228611	0.000228611	5.71527e-05	0.000114305	0	0.000171458	0	0.000457221	0	0.000114305	0	0	5.71527e-05	0.000228611	0.000171458	0.000171458	0.000114305	0.000228611	5.71527e-05	0.000114305	0.000457221	0.000114305	0.000114305	0.000228611	0	0.000228611	0.000114305	5.71527e-05
Otu00648	Bacteria;Firmicutes;Clostridia;Clostridiales;Ruminococcaceae;unclassified_Ruminococcaceae	Firmicutes	Clostridia	Clostridiales	Ruminococcaceae	unclassified_Ruminococcaceae	0.000108862	C70117_71_000000000C45C2_1_2104_13056_24524	0.00010478	1.90509e-05	2.85763e-05	6.66781e-05	0.000114305	0.000214322	0	0.000285763	0.000114305	0	0.000171458	5.71527e-05	5.71527e-05	5.71527e-05	0	0	0	0	0	0	0.000114305	0	0.000114305	0	0.000171458	5.71527e-05	0	5.71527e-05	0	5.71527e-05	5.71527e-05	0.000114305	5.71527e-05	0.000400069	5.71527e-05	5.71527e-05	0.000628679	0.000114305
Otu00649	Bacteria;Firmicutes;Clostridia;Clostridiales;unclassified_Clostridiales;	Firmicutes	Clostridia	Clostridiales	unclassified_Clostridiales		0.000108862	C70117_71_000000000C45C2_1_1108_12917_24523	0.000161933	5.71527e-05	2.85763e-05	5.71527e-05	3.81018e-05	0.000142882	0	0.000514374	0.000228611	0.000114305	5.71527e-05	5.71527e-05	0.000114305	0	0	0	0.000228611	0	0	0	0	0.000114305	0	0	0	0.000114305	0.000171458	5.71527e-05	0	5.71527e-05	5.71527e-05	0	0	0.000114305	0.000228611	0.000342916	0	0
Otu00650	Bacteria;Firmicutes;Clostridia;Clostridiales;Lachnospiraceae;Acetatifactor	Firmicutes	Clostridia	Clostridiales	Lachnospiraceae	Acetatifactor	0.000108862	M06047_81_000000000CBLT5_1_2104_8749_12926	8.5729e-05	0	0	0.000123831	2.85763e-05	0.000371492	0	0.000342916	0	0	0.000114305	5.71527e-05	0	0	0	0	0	0	0	0	0	0	0	0	5.71527e-05	0	0.000171458	0.000514374	0	0	0.000114305	0	5.71527e-05	0	0	0.00125736	0.000114305	0.000114305
Otu00651	Bacteria;Firmicutes;Clostridia;Clostridiales;Lachnospiraceae;unclassified_Lachnospiraceae	Firmicutes	Clostridia	Clostridiales	Lachnospiraceae	unclassified_Lachnospiraceae	0.000108862	M06047_81_000000000CBLT5_1_2107_2730_12706	9.52544e-05	9.52544e-05	0	9.52544e-05	0.000276238	0.000171458	0	0.000285763	0	5.71527e-05	0.000114305	0.000114305	0.000171458	0.000228611	0	0.000114305	0	5.71527e-05	0	0	0	0	0	0	5.71527e-05	0.000114305	0.000285763	0.000114305	0	5.71527e-05	0.000457221	0	0.00085729	0.000285763	0	0.000228611	0.000457221	0
Otu00652	Bacteria;Firmicutes;Clostridia;Clostridiales;Ruminococcaceae;unclassified_Ruminococcaceae	Firmicutes	Clostridia	Clostridiales	Ruminococcaceae	unclassified_Ruminococcaceae	0.000108862	M06047_81_000000000CBLT5_1_2115_9517_10099	6.66781e-05	7.62035e-05	0.000585815	1.90509e-05	7.62035e-05	0.000142882	5.71527e-05	0.000342916	0	0	0	0	5.71527e-05	0.000114305	5.71527e-05	0	0	0.000228611	0	0	0.00228611	5.71527e-05	0	0	0	0	0.000114305	0	0	0.000114305	5.71527e-05	0.000114305	0	0.000171458	5.71527e-05	0	0	0.000514374
Otu00653	Bacteria;Firmicutes;Clostridia;Clostridiales;Ruminococcaceae;unclassified_Ruminococcaceae	Firmicutes	Clostridia	Clostridiales	Ruminococcaceae	unclassified_Ruminococcaceae	0.000107955	M06047_81_000000000CBLT5_1_2118_24099_20632	8.5729e-05	5.71527e-05	2.85763e-05	3.81018e-05	0.000152407	0.000228611	0.000114305	0.000171458	5.71527e-05	0	5.71527e-05	0.000114305	0	0.000114305	0	5.71527e-05	0.000171458	0	5.71527e-05	5.71527e-05	0	0	0	0	0	0.000114305	0	0.000114305	0	5.71527e-05	0.000228611	0	0.000228611	0.000400069	0	0.000400069	0.000285763	0.000228611
Otu00654	Bacteria;Firmicutes;Clostridia;Clostridiales;Lachnospiraceae;unclassified_Lachnospiraceae	Firmicutes	Clostridia	Clostridiales	Lachnospiraceae	unclassified_Lachnospiraceae	0.000107955	M03062_107_000000000CBKND_1_1119_15095_2833	0.000219085	0.000238136	0.000300051	0	4.76272e-05	2.85763e-05	0	0.000514374	0	0	0.000800137	0	0	0	5.71527e-05	0.000457221	0.000914442	0	0.000171458	0.00085729	0.000171458	0	0	0	0	0	0	0	0	0	0	0.000285763	0	0	0	0	0	0.000114305
Otu00655	Bacteria;Firmicutes;Clostridia;Clostridiales;unclassified_Clostridiales;	Firmicutes	Clostridia	Clostridiales	unclassified_Clostridiales		0.000106141	C70117_71_000000000C45C2_1_2109_3797_14295	0.000152407	4.76272e-05	1.42882e-05	9.52544e-06	9.52544e-06	8.5729e-05	0	0.000171458	0	5.71527e-05	0.000114305	0.000571527	0.000228611	5.71527e-05	0	0	0	0	0	5.71527e-05	0	0	0	5.71527e-05	0	0	0	0	0	5.71527e-05	0	0	0	0	0.000342916	0	0	0
Otu00656	Bacteria;Firmicutes;Clostridia;Clostridiales;Lachnospiraceae;unclassified_Lachnospiraceae	Firmicutes	Clostridia	Clostridiales	Lachnospiraceae	unclassified_Lachnospiraceae	0.000106141	C70117_71_000000000C45C2_1_2101_18295_16979	9.52544e-05	2.85763e-05	0	3.81018e-05	3.81018e-05	0.000757273	0	0.000514374	0	0	5.71527e-05	0	5.71527e-05	5.71527e-05	0	0	5.71527e-05	0	0	0	0	0	0	0	5.71527e-05	0	0.000114305	5.71527e-05	0	0	5.71527e-05	0	0.000171458	0	0	0.000114305	0.00291479	0
Otu00657	Bacteria;Firmicutes;Clostridia;Clostridiales;Lachnospiraceae;unclassified_Lachnospiraceae	Firmicutes	Clostridia	Clostridiales	Lachnospiraceae	unclassified_Lachnospiraceae	0.000106141	C70117_71_000000000C45C2_1_2110_9034_21930	0.000114305	7.62035e-05	0	0.000323865	9.52544e-05	0.000114305	0.000114305	0.000114305	5.71527e-05	0	0	0.000400069	0.000285763	5.71527e-05	0	0.000114305	0	0	0	0	0	0	0.00102875	0.000285763	5.71527e-05	5.71527e-05	0	0.000514374	0.000114305	5.71527e-05	5.71527e-05	0	0.000228611	0.000114305	0	0.000285763	0.000114305	5.71527e-05
Otu00658	Bacteria;Bacteroidetes;Bacteroidia;Bacteroidales;Porphyromonadaceae;unclassified_Porphyromonadaceae	Bacteroidetes	Bacteroidia	Bacteroidales	Porphyromonadaceae	unclassified_Porphyromonadaceae	0.000105233	M03062_107_000000000CBKND_1_2101_23156_16742	0.000171458	0.00010478	2.85763e-05	3.81018e-05	4.76272e-05	7.14408e-05	0	0.000228611	0.000457221	0	0.000228611	0.000114305	0	0.000171458	0	0.000114305	0.000228611	0.000114305	0	0	5.71527e-05	5.71527e-05	0.000114305	0	0	0	0	0.000114305	0.000114305	5.71527e-05	5.71527e-05	0	0	5.71527e-05	0.000285763	0	0	0
Otu00659	Bacteria;Actinobacteria;Actinobacteria;Coriobacteriales;Coriobacteriaceae;unclassified_Coriobacteriaceae	Actinobacteria	Actinobacteria	Coriobacteriales	Coriobacteriaceae	unclassified_Coriobacteriaceae	0.000105233	M06047_81_000000000CBLT5_1_1108_3724_8331	0.000200034	0	0	4.76272e-05	9.52544e-06	1.42882e-05	0	0.000514374	5.71527e-05	5.71527e-05	0.000114305	0.000457221	0	0	0	0	0	0	0	0	0	0	5.71527e-05	5.71527e-05	0	5.71527e-05	0.000114305	0	0	5.71527e-05	0	0	0	0	0	5.71527e-05	0	0
Otu00660	Bacteria;Firmicutes;Clostridia;Clostridiales;unclassified_Clostridiales;	Firmicutes	Clostridia	Clostridiales	unclassified_Clostridiales		0.000104326	M06047_81_000000000CBLT5_1_1114_13401_18981	6.66781e-05	3.81018e-05	8.5729e-05	6.66781e-05	3.81018e-05	5.71527e-05	0	0	0	5.71527e-05	0.000171458	0.000171458	5.71527e-05	5.71527e-05	0	0	0	0.000114305	5.71527e-05	0.000171458	0	0.000114305	0	0	0.000342916	5.71527e-05	0	0	0	0	0	0.000114305	0	0.000114305	5.71527e-05	0	0.000114305	5.71527e-05
Otu00661	Bacteria;Firmicutes;Clostridia;Clostridiales;Ruminococcaceae;Clostridium IV	Firmicutes	Clostridia	Clostridiales	Ruminococcaceae	Clostridium IV	0.000103419	M06047_81_000000000CBLT5_1_2102_28989_15572	3.81018e-05	3.81018e-05	0.000142882	7.62035e-05	0.00020956	0.000171458	0	5.71527e-05	0	0	0.000114305	5.71527e-05	0	0	0	5.71527e-05	5.71527e-05	0.000114305	0.000171458	5.71527e-05	0	0.000342916	0.000114305	0	0.000114305	0.000171458	5.71527e-05	0	5.71527e-05	0.000114305	0.000171458	0	0.000514374	0.000400069	0.000114305	0.000514374	5.71527e-05	0
Otu00662	Bacteria;Firmicutes;Clostridia;Clostridiales;Ruminococcaceae;unclassified_Ruminococcaceae	Firmicutes	Clostridia	Clostridiales	Ruminococcaceae	unclassified_Ruminococcaceae	0.000103419	C70117_71_000000000C45C2_1_2109_9073_13010	0.000142882	2.85763e-05	0	7.62035e-05	0.000180983	8.5729e-05	0.000114305	5.71527e-05	0	0	0.000228611	0.000457221	5.71527e-05	0	0	5.71527e-05	0	5.71527e-05	0	0	0	0	0	0	0	0.000228611	0.000171458	5.71527e-05	0	5.71527e-05	0.000171458	5.71527e-05	0.000685832	0.000114305	5.71527e-05	0.000171458	5.71527e-05	5.71527e-05
Otu00663	Bacteria;Proteobacteria;Deltaproteobacteria;unclassified_Deltaproteobacteria;;	Proteobacteria	Deltaproteobacteria	unclassified_Deltaproteobacteria			0.000102512	M06047_81_000000000CBLT5_1_2109_16228_7871	3.81018e-05	9.52544e-06	0	7.62035e-05	5.71527e-05	0.000200034	0.000114305	5.71527e-05	0	5.71527e-05	0	0	0	0	5.71527e-05	0	0	0	0	0	0	0	0	0	0	0	5.71527e-05	0.000400069	0	0.000114305	5.71527e-05	0	0.000114305	5.71527e-05	0	0	0.000800137	0
Otu00664	Bacteria;Tenericutes;Mollicutes;Anaeroplasmatales;Anaeroplasmataceae;Anaeroplasma	Tenericutes	Mollicutes	Anaeroplasmatales	Anaeroplasmataceae	Anaeroplasma	0.000102512	C70117_71_000000000C45C2_1_2109_10184_3116	0.00010478	2.85763e-05	4.28645e-05	0.000428645	5.71527e-05	5.71527e-05	0.000114305	0.000342916	5.71527e-05	0	0.000114305	0	0	0.000114305	0	5.71527e-05	0	0	0	0	0.000171458	0	5.71527e-05	0	0.000800137	0	5.71527e-05	0.00165743	0	0.000114305	0	0	5.71527e-05	0.000171458	0	0.000228611	0	0
Otu00665	Bacteria;Firmicutes;Clostridia;Clostridiales;Ruminococcaceae;unclassified_Ruminococcaceae	Firmicutes	Clostridia	Clostridiales	Ruminococcaceae	unclassified_Ruminococcaceae	0.000100698	M06047_81_000000000CBLT5_1_1112_9170_6981	0.00010478	1.90509e-05	2.85763e-05	0.000600103	7.62035e-05	5.71527e-05	0	5.71527e-05	0	5.71527e-05	0.000171458	0.000342916	5.71527e-05	5.71527e-05	0	0	0	0	0.000114305	0	0	0	0	5.71527e-05	0.000742985	0.000685832	0.000171458	0.00194319	0	0	0.000457221	0	0	0	0	0.000114305	0	0.000114305
Otu00666	Bacteria;Bacteroidetes;Bacteroidia;Bacteroidales;Porphyromonadaceae;unclassified_Porphyromonadaceae	Bacteroidetes	Bacteroidia	Bacteroidales	Porphyromonadaceae	unclassified_Porphyromonadaceae	0.000100698	M01394_160_000000000C9RJW_1_1111_12658_7648	0	0	0	0.000190509	0.00020956	7.14408e-05	0	0	0	0	0	0	0	0	0	0	0	0	0	0	0	0	0	0	0.000514374	0	0.000400069	0.000228611	0	0	0.000457221	0	0.000457221	0.000342916	0	0.000171458	0.000114305	0
Otu00667	Bacteria;Firmicutes;Clostridia;Clostridiales;Ruminococcaceae;unclassified_Ruminococcaceae	Firmicutes	Clostridia	Clostridiales	Ruminococcaceae	unclassified_Ruminococcaceae	9.97903e-05	M06047_81_000000000CBLT5_1_2104_11844_14622	2.85763e-05	3.81018e-05	1.42882e-05	9.52544e-05	5.71527e-05	0.000142882	5.71527e-05	0	0	0	0.000114305	0	5.71527e-05	0.000171458	0	0	0	0	5.71527e-05	0	0	0	0.000285763	0.000228611	0	5.71527e-05	0	0	0	5.71527e-05	0	0	0.000228611	5.71527e-05	0.000171458	0.000114305	0.000171458	0.000114305
Otu00668	Bacteria;Firmicutes;Clostridia;Clostridiales;Lachnospiraceae;Clostridium XlVa	Firmicutes	Clostridia	Clostridiales	Lachnospiraceae	Clostridium XlVa	9.88832e-05	M01394_160_000000000C9RJW_1_2117_9332_10810	0	9.52544e-06	0	0.000295289	0.000238136	8.5729e-05	0	0	0	0	0	0	0	0	5.71527e-05	0	0	0	0	0	0	0	0	0	0.000114305	0	0.000742985	0.000914442	0	0	0.000914442	0	0	0.000514374	0	5.71527e-05	0.000285763	0
Otu00669	Bacteria;unclassified_Bacteria;;;;	unclassified_Bacteria					9.88832e-05	C70117_71_000000000C45C2_1_2102_17065_16235	2.85763e-05	9.52544e-06	0.00015717	0	7.62035e-05	4.28645e-05	0.000171458	0	0	0	0	0	0	0	0	0	5.71527e-05	0	0.000628679	0	0	0	0	0	0	0	0	0	0	0.000342916	0	0	0	0.000114305	0.000171458	0	0	0
Otu00670	Bacteria;Proteobacteria;Gammaproteobacteria;unclassified_Gammaproteobacteria;;	Proteobacteria	Gammaproteobacteria	unclassified_Gammaproteobacteria			9.88832e-05	M06047_81_000000000CBLT5_1_1114_4412_19380	5.71527e-05	9.52544e-06	0	2.85763e-05	8.5729e-05	0	0	0	0	0.000228611	0	0.000114305	0	5.71527e-05	0	0	0	0	0	0	0	0	0.000114305	5.71527e-05	0	0	0	0	0.000514374	0	0	0	0	0	0	0	0	0
Otu00671	Bacteria;Firmicutes;Clostridia;Clostridiales;Lachnospiraceae;unclassified_Lachnospiraceae	Firmicutes	Clostridia	Clostridiales	Lachnospiraceae	unclassified_Lachnospiraceae	9.7976e-05	M01394_160_000000000C9RJW_1_2103_16982_14824	0	1.90509e-05	0	2.85763e-05	9.52544e-06	0	0	0	0	0	0	0	0	5.71527e-05	0	0	5.71527e-05	0	0	0	0	0	0.000114305	5.71527e-05	0	0	0	0	0	0	0	0	0	5.71527e-05	0	0	0	0
Otu00672	Bacteria;Bacteroidetes;Bacteroidia;Bacteroidales;Prevotellaceae;Alloprevotella	Bacteroidetes	Bacteroidia	Bacteroidales	Prevotellaceae	Alloprevotella	9.7976e-05	M06047_81_000000000CBLT5_1_2119_10758_15831	0.000190509	0.000276238	4.28645e-05	0.000238136	3.81018e-05	0	0.000400069	0.000114305	0.000114305	0	0.000285763	0.000228611	0.000628679	0.000685832	0	0.000171458	0	0.000171458	0	0	0.000114305	5.71527e-05	0	0	0	0.00142882	0	0	5.71527e-05	0.000114305	0	5.71527e-05	0	0	0	0	0	0
Otu00673	Bacteria;Firmicutes;Clostridia;Clostridiales;Lachnospiraceae;Clostridium XlVa	Firmicutes	Clostridia	Clostridiales	Lachnospiraceae	Clostridium XlVa	9.7976e-05	M03062_107_000000000CBKND_1_1102_7037_6093	6.66781e-05	1.90509e-05	4.28645e-05	0.000276238	0.000190509	2.85763e-05	0	0.000228611	5.71527e-05	0	0	0.000114305	0	0	0	0	5.71527e-05	5.71527e-05	0	0.000114305	0	5.71527e-05	0	0	5.71527e-05	0.000228611	0.00120021	0.000171458	5.71527e-05	0	0.000914442	0	5.71527e-05	0.000114305	5.71527e-05	0	5.71527e-05	0
Otu00674	Bacteria;Firmicutes;Clostridia;Clostridiales;Ruminococcaceae;Butyricicoccus	Firmicutes	Clostridia	Clostridiales	Ruminococcaceae	Butyricicoccus	9.70688e-05	M06047_81_000000000CBLT5_1_1104_16095_23505	0.000180983	0.000123831	5.71527e-05	9.52544e-05	8.5729e-05	8.5729e-05	0	0.000228611	0.000171458	0.000171458	0.000400069	0.000114305	0.000171458	0	5.71527e-05	0.000228611	0.000171458	0.000114305	0.000114305	0.000114305	0	0	5.71527e-05	5.71527e-05	0	0.000228611	0.000171458	5.71527e-05	5.71527e-05	0	0.000228611	0.000114305	0.000114305	0	0.000114305	0.000114305	5.71527e-05	5.71527e-05
Otu00675	Bacteria;Firmicutes;Clostridia;Clostridiales;unclassified_Clostridiales;	Firmicutes	Clostridia	Clostridiales	unclassified_Clostridiales		9.61616e-05	M06047_81_000000000CBLT5_1_2110_11310_4405	0.00020956	0.000161933	1.42882e-05	9.52544e-06	8.5729e-05	8.5729e-05	0.000342916	0.000114305	0.000114305	5.71527e-05	0.000114305	0.000514374	5.71527e-05	5.71527e-05	0.000114305	0.000171458	0.000571527	0	5.71527e-05	0	0	0	0	0	0	5.71527e-05	0	0	0	0.000457221	5.71527e-05	0	0	0	5.71527e-05	0	0	0.000285763
Otu00676	Bacteria;Firmicutes;Clostridia;Clostridiales;unclassified_Clostridiales;	Firmicutes	Clostridia	Clostridiales	unclassified_Clostridiales		9.61616e-05	M03062_107_000000000CBKND_1_2113_23495_13094	7.62035e-05	7.62035e-05	1.42882e-05	0.000133356	1.90509e-05	8.5729e-05	0.000114305	0	5.71527e-05	5.71527e-05	0	0.000228611	0.000400069	0	0	5.71527e-05	0	0	0	0	0	5.71527e-05	0	0	0.000400069	5.71527e-05	0	0.000342916	0	0	0	5.71527e-05	5.71527e-05	0	5.71527e-05	0	0.000171458	0.000114305
Otu00677	Bacteria;Firmicutes;Clostridia;Clostridiales;Lachnospiraceae;unclassified_Lachnospiraceae	Firmicutes	Clostridia	Clostridiales	Lachnospiraceae	unclassified_Lachnospiraceae	9.61616e-05	C70117_71_000000000C45C2_1_2101_17096_9049	0.000142882	0	2.85763e-05	6.66781e-05	3.81018e-05	0.000414357	0	0.000514374	0	0	0.000114305	0.000228611	0	0	0	0	0	0	5.71527e-05	0	0	5.71527e-05	0	5.71527e-05	5.71527e-05	0	0.000114305	0.000171458	0	5.71527e-05	0.000114305	0	5.71527e-05	0	0	0	0.00160027	5.71527e-05
Otu00678	Bacteria;Firmicutes;Clostridia;Clostridiales;Lachnospiraceae;Clostridium XlVa	Firmicutes	Clostridia	Clostridiales	Lachnospiraceae	Clostridium XlVa	9.52544e-05	M06047_81_000000000CBLT5_1_1110_18594_13410	9.52544e-06	9.52544e-06	2.85763e-05	0.000219085	0.000190509	0.000500086	5.71527e-05	0	0	0	0	0	0	0	0	0	0	5.71527e-05	5.71527e-05	5.71527e-05	0	0	0	5.71527e-05	5.71527e-05	0	0.000285763	0.000914442	5.71527e-05	0	0.000114305	5.71527e-05	0.000571527	0.000342916	0	0.000914442	0.0010859	0
Otu00679	Bacteria;Bacteroidetes;Bacteroidia;Bacteroidales;Porphyromonadaceae;unclassified_Porphyromonadaceae	Bacteroidetes	Bacteroidia	Bacteroidales	Porphyromonadaceae	unclassified_Porphyromonadaceae	9.43472e-05	C70117_71_000000000C45C2_1_2104_2430_9134	0.000304814	0.000238136	7.14408e-05	9.52544e-05	9.52544e-06	4.28645e-05	0	0.000342916	0	0.000114305	0.00120021	0.000171458	5.71527e-05	5.71527e-05	0.000114305	0.000742985	0	0.000457221	0	0.000114305	0.000114305	5.71527e-05	0.000228611	0.000228611	0	0.000114305	0	0	0	5.71527e-05	0	0	0	0	5.71527e-05	0	0	0.000114305
Otu00680	Bacteria;Bacteroidetes;Bacteroidia;Bacteroidales;Porphyromonadaceae;unclassified_Porphyromonadaceae	Bacteroidetes	Bacteroidia	Bacteroidales	Porphyromonadaceae	unclassified_Porphyromonadaceae	9.34401e-05	C70117_71_000000000C45C2_1_1108_16166_10186	0.000161933	8.5729e-05	1.42882e-05	0.000285763	0.000123831	8.5729e-05	0	0	0	5.71527e-05	0	0.000914442	0.000114305	0.000228611	0.000171458	0	0	0	0	5.71527e-05	0	0	0.000514374	0.000742985	0	5.71527e-05	0.000285763	0.000114305	0.000171458	5.71527e-05	0.000171458	5.71527e-05	0.000228611	5.71527e-05	0.000171458	0	0.000114305	5.71527e-05
Otu00681	Bacteria;Firmicutes;Erysipelotrichia;Erysipelotrichales;Erysipelotrichaceae;unclassified_Erysipelotrichaceae	Firmicutes	Erysipelotrichia	Erysipelotrichales	Erysipelotrichaceae	unclassified_Erysipelotrichaceae	9.34401e-05	M06047_81_000000000CBLT5_1_1114_12754_22294	8.5729e-05	3.81018e-05	1.42882e-05	0.000238136	0.000142882	0.000200034	5.71527e-05	5.71527e-05	0.000171458	5.71527e-05	5.71527e-05	0.000114305	0	0	5.71527e-05	0.000171458	0	0	5.71527e-05	0	0	0	0.000114305	0	0.000628679	0.000400069	0	0.000285763	5.71527e-05	0.000228611	0	5.71527e-05	0.000457221	5.71527e-05	5.71527e-05	0.000114305	0.000571527	5.71527e-05
Otu00682	Bacteria;Bacteroidetes;Bacteroidia;Bacteroidales;Prevotellaceae;Alloprevotella	Bacteroidetes	Bacteroidia	Bacteroidales	Prevotellaceae	Alloprevotella	9.34401e-05	C70117_71_000000000C45C2_1_2105_21215_6525	8.5729e-05	8.5729e-05	1.42882e-05	0.000581052	6.66781e-05	1.42882e-05	0	0	0	0.000114305	0	0.000400069	0	0.000514374	0	0	0	0	0	5.71527e-05	0	0	0.00182888	0.00165743	0	0	0	0	0.000400069	0	0	0	0	0	5.71527e-05	0	0	0
Otu00683	Bacteria;Firmicutes;Clostridia;Clostridiales;Ruminococcaceae;unclassified_Ruminococcaceae	Firmicutes	Clostridia	Clostridiales	Ruminococcaceae	unclassified_Ruminococcaceae	9.25329e-05	M06047_81_000000000CBLT5_1_2111_22352_15879	4.76272e-05	0.000171458	0.000371492	5.71527e-05	2.85763e-05	4.28645e-05	5.71527e-05	0	0.000114305	0	5.71527e-05	5.71527e-05	5.71527e-05	0.000628679	0	0	0	0.000342916	0.00114305	0.000342916	0	0	0	0	5.71527e-05	5.71527e-05	5.71527e-05	0.000171458	0	0	5.71527e-05	0	5.71527e-05	5.71527e-05	5.71527e-05	0	0	0.000114305
Otu00684	Bacteria;Firmicutes;Clostridia;Clostridiales;unclassified_Clostridiales;	Firmicutes	Clostridia	Clostridiales	unclassified_Clostridiales		9.25329e-05	M06047_81_000000000CBLT5_1_1103_9059_3952	3.81018e-05	2.85763e-05	4.28645e-05	5.71527e-05	0.000133356	7.14408e-05	0	5.71527e-05	0	0	0.000114305	5.71527e-05	0	0	5.71527e-05	0.000114305	0	0	5.71527e-05	5.71527e-05	5.71527e-05	0	0	5.71527e-05	5.71527e-05	5.71527e-05	5.71527e-05	0.000114305	0	0	5.71527e-05	5.71527e-05	0.000571527	0.000114305	0	5.71527e-05	0.000228611	0
Otu00685	Bacteria;Actinobacteria;Actinobacteria;Coriobacteriales;Coriobacteriaceae;unclassified_Coriobacteriaceae	Actinobacteria	Actinobacteria	Coriobacteriales	Coriobacteriaceae	unclassified_Coriobacteriaceae	9.25329e-05	C70117_71_000000000C45C2_1_1107_10832_5971	3.81018e-05	0.00010478	0.000142882	4.76272e-05	3.81018e-05	8.5729e-05	0	0	0	5.71527e-05	0.000171458	0	5.71527e-05	0.000114305	0.000171458	0.000228611	5.71527e-05	0	5.71527e-05	0.000342916	0	0.000171458	5.71527e-05	5.71527e-05	0	0.000114305	0	5.71527e-05	5.71527e-05	0	0	0.000171458	0	0	0.000171458	0	0	0.000171458
Otu00686	Bacteria;Bacteroidetes;Flavobacteriia;Flavobacteriales;Flavobacteriaceae;Gilvibacter	Bacteroidetes	Flavobacteriia	Flavobacteriales	Flavobacteriaceae	Gilvibacter	9.25329e-05	M06047_81_000000000CBLT5_1_1105_24293_9783	1.90509e-05	0	0	0	9.52544e-06	0	0	0	0	0.000114305	0	0	0	0	0	0	0	0	0	0	0	0	0	0	0	0	0	0	5.71527e-05	0	0	0	0	0	0	0	0	0
Otu00687	Bacteria;Firmicutes;Clostridia;Clostridiales;Ruminococcaceae;Intestinimonas	Firmicutes	Clostridia	Clostridiales	Ruminococcaceae	Intestinimonas	9.25329e-05	M06047_81_000000000CBLT5_1_2102_21285_7553	0.000152407	2.85763e-05	0	9.52544e-05	9.52544e-05	8.5729e-05	0.000114305	0.000114305	0.000171458	5.71527e-05	0.000114305	0.000342916	0	0	0	5.71527e-05	5.71527e-05	5.71527e-05	0	0	0	0	0.000285763	0	0	5.71527e-05	0	0.000228611	0.000114305	0	0.000114305	0	5.71527e-05	0.000285763	0	0.000228611	0.000114305	0
Otu00688	Bacteria;Firmicutes;Clostridia;Clostridiales;Lachnospiraceae;unclassified_Lachnospiraceae	Firmicutes	Clostridia	Clostridiales	Lachnospiraceae	unclassified_Lachnospiraceae	9.25329e-05	M06047_81_000000000CBLT5_1_1101_13507_8764	1.90509e-05	9.52544e-06	2.85763e-05	0	0	7.14408e-05	0.000114305	0	0	0	0	0	0	5.71527e-05	0	0	0	0	5.71527e-05	0	0	5.71527e-05	0	0	0	0	0	0	0	0	0	0	0	0	0	0	0	0.000285763
Otu00689	Bacteria;Firmicutes;Clostridia;Clostridiales;Lachnospiraceae;unclassified_Lachnospiraceae	Firmicutes	Clostridia	Clostridiales	Lachnospiraceae	unclassified_Lachnospiraceae	9.25329e-05	M03062_107_000000000CBKND_1_2115_10639_2642	8.5729e-05	9.52544e-06	0	0.000171458	4.76272e-05	0	0	0	0	0	0.000114305	0.000400069	0	0	0	0	5.71527e-05	0	0	0	0	0	0	0	0	0	0.00102875	0	0	0	0.000228611	5.71527e-05	0	0	0	0	0	0
Otu00690	Bacteria;Firmicutes;Clostridia;Clostridiales;Ruminococcaceae;unclassified_Ruminococcaceae	Firmicutes	Clostridia	Clostridiales	Ruminococcaceae	unclassified_Ruminococcaceae	9.25329e-05	M03062_107_000000000CBKND_1_2110_18641_12645	2.85763e-05	0.00010478	0.00031434	0.000180983	0.000219085	8.5729e-05	0	0	0.000114305	0	5.71527e-05	0	0	0.000114305	0	0.000114305	0.000342916	5.71527e-05	0.000114305	0.000171458	0.000171458	0.000800137	0.000171458	0.000342916	0.000114305	0.000342916	5.71527e-05	5.71527e-05	0.000342916	0.000400069	0	0.000514374	5.71527e-05	0	0.000228611	0	0	0.000114305
[truncated: 15,482 more rows]

## Sheet: 0.03-taxonomy
taxonomy	phylum	class	order	family	genus	Total propotion of all samples	OP1	OP2	OP3	OPC1	OPC2	OPC3	OP11	OP111	OP13	OP14	OP15	OP16	OP21	OP211	OP23	OP24	OP25	OP26	OP35	OP36	OP37	OP38	OPC11	OPC12	OPC13	OPC14	OPC15	OPC16	OPC21	OPC22	OPC23	OPC24	OPC25	OPC26	OPC33	OPC34	OPC35	OPC36
[truncated: 390 more rows]

[truncated: 8 more sheets: phylum, class, order, family, genus, OPC1-OP1, OPC2-OP2, OPC3-OP3]
