# Supplementary material for: Fecal microbiota transplantation mitigates bone loss by improving gut microbiome composition and gut barrier function in aged rats
Source: PeerJ. 2021 Oct 21;9:e12293. doi: 10.7717/peerj.12293 (PMC8542369; doi:10.7717/peerj.12293)
Supplement: Supplemental Information 4 [file peerj-09-12293-s004.xlsx]

## Sheet: Sheet1
#OTU ID	OP11	OP111	OP13	OP14	OP15	OP16	OP21	OP211	OP23	OP24	OP25	OP26	OP35	OP36	OP37	OP38	OPC11	OPC12	OPC13	OPC14	OPC15	OPC16	OPC21	OPC22	OPC23	OPC24	OPC25	OPC26	OPC33	OPC34	OPC35	OPC36	KEGG_Pathways
1,1,1-Trichloro-2,2-bis(4-chlorophenyl)ethane (DDT) degradation	21	33	94	68	47	77	7	26	14	25	21	121	67	115	91	153	64	87	103	77	22	104	53	32	24	89	33	21	82	34	26	40	Metabolism; Xenobiotics Biodegradation and Metabolism; 1,1,1-Trichloro-2,2-bis(4-chlorophenyl)ethane (DDT) degradation
ABC transporters	510044	580760	406936	399866	553980	600484	528213	501896	439471	614546	582123	602884	452639	418192	298562	510332	379406	352604	340816	419908	637649	500816	563029	622058	609353	682190	681655	661084	475032	642397	693097	499325	Environmental Information Processing; Membrane Transport; ABC transporters
Adherens junction	0	0	0	0	0	0	0	0	0	0	0	0	0	0	0	0	0	0	0	0	0	0	0	0	0	0	0	0	0	0	0	0	Cellular Processes; Cell Communication; Adherens junction
Adipocytokine signaling pathway	11465	10737	9755	8856	10531	11188	10659	10602	11048	11632	10968	10256	11197	10289	8587	10673	8434	8945	11441	9864	11282	10712	9091	11005	11269	10701	11879	10600	10242	11418	11415	9197	Organismal Systems; Endocrine System; Adipocytokine signaling pathway
African trypanosomiasis	99	141	121	172	117	178	121	149	147	136	119	173	164	315	28	403	1120	1304	147	219	42	146	155	85	27	127	43	34	189	102	47	174	Human Diseases; Infectious Diseases; African trypanosomiasis
Alanine, aspartate and glutamate metabolism	193817	211722	157371	140600	203445	211181	195751	172542	158058	215246	191643	200794	145423	159829	135282	173253	144987	138605	147772	164977	230024	197047	190776	219264	218830	205027	259204	237142	170263	228988	252513	184772	Metabolism; Amino Acid Metabolism; Alanine, aspartate and glutamate metabolism
Aldosterone-regulated sodium reabsorption	0	0	0	0	0	0	0	0	0	0	0	0	0	0	0	0	0	0	0	0	0	0	0	0	0	0	0	0	0	0	0	0	Organismal Systems; Excretory System; Aldosterone-regulated sodium reabsorption
Alzheimer's disease	8949	9972	9202	7055	10045	10184	9046	8855	7244	9530	8354	8841	7061	7227	5716	7741	7135	7164	6560	7345	10964	8959	8135	9775	10410	9018	11925	10706	8387	11267	11766	8341	Human Diseases; Neurodegenerative Diseases; Alzheimer's disease
Amino acid metabolism	47452	53569	36919	32427	49759	53689	49276	40893	36876	54291	45209	52012	32824	36471	28533	40599	37521	33652	33319	39009	55143	47280	49346	56119	51850	58417	66580	63055	40052	58647	63661	47050	Unclassified; Metabolism; Amino acid metabolism
Amino acid related enzymes	257329	278205	217479	197848	269187	279197	259098	233757	215404	282713	256615	264541	206669	214909	164319	234675	193802	186348	195064	216947	303354	258357	242970	284069	290292	278312	329886	306086	229608	299885	325326	239354	Metabolism; Amino Acid Metabolism; Amino acid related enzymes
Amino sugar and nucleotide sugar metabolism	266645	289455	208904	200095	276320	291147	265633	230157	211492	299572	261838	265518	203393	211675	162861	222690	189810	180456	185148	218194	310699	265006	262104	302473	295635	280195	354164	328832	229229	312314	342674	258077	Metabolism; Carbohydrate Metabolism; Amino sugar and nucleotide sugar metabolism
Aminoacyl-tRNA biosynthesis	204968	222498	177927	161130	214863	223069	209676	186855	173864	226171	203077	212437	170461	172585	122936	193042	147562	141593	150497	171921	247547	202172	186736	224806	236596	227194	262689	243309	184081	241036	262815	187599	Genetic Information Processing; Translation; Aminoacyl-tRNA biosynthesis
Aminobenzoate degradation	23399	22956	20267	24827	22460	25109	23395	18805	19258	24335	21267	19011	18709	17937	12729	19861	22529	22351	15716	18200	23811	20395	19857	22557	23318	20950	24242	24415	21423	24482	23841	21618	Metabolism; Xenobiotics Biodegradation and Metabolism; Aminobenzoate degradation
Amoebiasis	1801	1574	1905	1793	1663	1552	1481	2581	2245	1935	2953	2699	2640	2012	568	2954	2295	2406	1946	1542	1833	1749	2017	1776	1937	4294	1383	1683	2410	1815	1462	1220	Human Diseases; Infectious Diseases; Amoebiasis
Amyotrophic lateral sclerosis (ALS)	2462	2734	3114	3316	2948	2966	2287	2528	2749	2421	2252	2483	2316	1621	2040	1845	1639	1532	2865	2150	2305	2054	2547	2981	2632	1730	2248	1647	3073	2377	1715	2456	Human Diseases; Neurodegenerative Diseases; Amyotrophic lateral sclerosis (ALS)
Antigen processing and presentation	7860	8737	6687	5400	8437	8590	7884	7032	6469	8692	7644	8424	5816	6792	6634	7391	6230	5989	6324	7117	9736	8258	7881	8870	9182	8497	10905	9798	6935	9543	10740	7346	Organismal Systems; Immune System; Antigen processing and presentation
Apoptosis	217	118	204	618	108	93	368	123	168	177	66	224	241	1240	298	211	272	330	82	304	41	65	269	159	28	191	46	50	164	49	73	451	Cellular Processes; Cell Growth and Death; Apoptosis
Arachidonic acid metabolism	2517	1929	2841	3287	2114	2341	1717	2828	2181	1919	2209	1846	2539	1840	1170	2376	4265	4643	2404	2239	1487	2875	2168	1713	1429	1837	1456	1835	2488	2288	1619	1865	Metabolism; Lipid Metabolism; Arachidonic acid metabolism
Arginine and proline metabolism	218953	244790	179600	160292	235693	246785	226391	203878	185389	254420	228833	236025	169565	186183	139098	207288	177848	170485	166081	184651	269308	225134	220478	253526	255882	256902	299209	278824	200524	266136	293478	208377	Metabolism; Amino Acid Metabolism; Arginine and proline metabolism
Arrhythmogenic right ventricular cardiomyopathy (ARVC)	0	0	0	0	0	0	0	0	0	0	0	0	0	0	0	0	0	0	0	0	0	0	0	0	0	0	0	0	0	0	0	0	Human Diseases; Cardiovascular Diseases; Arrhythmogenic right ventricular cardiomyopathy (ARVC)
Ascorbate and aldarate metabolism	18084	20368	13257	14010	18804	20392	17005	15697	14508	20070	17787	22350	12966	13933	16225	15759	13637	12586	12747	15901	19968	16539	23706	23753	19880	18916	23524	20791	16694	21828	21813	19436	Metabolism; Carbohydrate Metabolism; Ascorbate and aldarate metabolism
Atrazine degradation	2431	2401	3271	3035	3032	2775	2338	4662	3504	3501	4984	4686	3765	4427	1261	4630	6408	7110	2012	1955	2770	1844	3037	3201	2784	7783	2069	2281	4387	2994	2098	1945	Metabolism; Xenobiotics Biodegradation and Metabolism; Atrazine degradation
Bacterial chemotaxis	64128	68916	57282	58511	76453	76374	67161	83877	70727	80148	82003	68938	84497	49814	31981	71312	47535	50152	54208	52013	90085	65202	57410	75042	88821	77211	70909	71311	74420	78361	81736	57151	Cellular Processes; Cell Motility; Bacterial chemotaxis
Bacterial invasion of epithelial cells	125	106	83	97	152	163	146	167	134	176	110	130	490	44	72	38	204	229	559	108	79	81	116	169	100	57	42	50	217	114	34	367	Human Diseases; Infectious Diseases; Bacterial invasion of epithelial cells
Bacterial motility proteins	120787	127400	121886	126918	145419	141255	130197	171007	150420	156067	160836	122393	185441	96218	51208	147030	96304	103564	113008	99861	181626	117606	95575	135822	180048	131649	125039	123354	153308	146606	152017	101766	Cellular Processes; Cell Motility; Bacterial motility proteins
Bacterial secretion system	95128	105829	84879	71285	103053	106331	96212	88300	78820	103336	91503	98155	74928	80368	64095	85176	88715	87177	74988	81646	113796	97354	91903	106552	108494	97529	125449	114438	86445	116722	123047	91937	Environmental Information Processing; Membrane Transport; Bacterial secretion system
Bacterial toxins	19192	20734	18486	15576	20297	20892	19087	18158	16165	20378	19490	21288	15938	16492	15859	17343	16919	16681	15325	17123	21570	19297	20632	21969	21346	21742	23985	22121	18224	22709	22829	19130	Environmental Information Processing; Signaling Molecules and Interaction; Bacterial toxins
Basal transcription factors	77	76	35	90	30	90	72	134	116	100	164	185	86	215	10	392	27	39	34	41	31	19	27	18	66	187	5	38	125	56	83	47	Genetic Information Processing; Transcription; Basal transcription factors
Base excision repair	70886	77350	61908	57270	74423	78262	73303	65440	61333	79075	73043	78170	59142	62211	44557	70144	57359	56385	54515	61464	84243	71003	69002	79043	81089	84657	90788	83582	64502	83147	89337	67227	Genetic Information Processing; Replication and Repair; Base excision repair
Benzoate degradation	43481	45780	35244	37157	43836	48088	45960	38265	35657	49361	42070	38130	36492	29354	21311	36682	29936	27639	28377	32772	49529	38467	40343	47744	47303	37896	53123	52719	40484	51192	53727	41750	Metabolism; Xenobiotics Biodegradation and Metabolism; Benzoate degradation
Betalain biosynthesis	0	0	0	17	0	1	0	7	0	12	0	0	0	0	0	0	2	3	0	0	0	0	12	1	1	0	0	0	0	0	0	0	Metabolism; Biosynthesis of Other Secondary Metabolites; Betalain biosynthesis
Bile secretion	0	0	0	50	0	19	0	12	0	10	0	0	1	0	0	0	22	31	0	0	0	0	49	0	0	0	2	0	0	0	1	0	Organismal Systems; Digestive System; Bile secretion
Biosynthesis and biodegradation of secondary metabolites	5131	6265	6310	5073	6596	6293	5450	6764	6018	5644	7309	9366	5934	6711	6336	8183	7938	8034	5870	5947	6778	5427	7191	6482	6864	10446	5913	4978	6745	6604	5911	6064	Unclassified; Metabolism; Biosynthesis and biodegradation of secondary metabolites
Biosynthesis of 12-, 14- and 16-membered macrolides	0	0	0	0	0	0	0	0	0	0	0	0	0	0	0	0	0	0	0	0	0	0	0	0	0	0	0	0	0	0	0	0	Metabolism; Metabolism of Terpenoids and Polyketides; Biosynthesis of 12-, 14- and 16-membered macrolides
Biosynthesis of ansamycins	16932	19361	12915	11985	18506	19319	17116	15861	14184	19586	18031	19277	15510	13363	11351	15542	11053	10440	11997	14605	21918	17297	19142	21036	21053	18032	23191	21491	15158	21700	23604	16841	Metabolism; Metabolism of Terpenoids and Polyketides; Biosynthesis of ansamycins
Biosynthesis of siderophore group nonribosomal peptides	8648	9234	5121	4777	8158	9653	8496	6027	4804	10325	6647	5363	3815	3882	2965	4015	4449	3801	3603	5610	9919	8442	6855	9620	9046	4495	13341	12465	5531	10581	12502	7815	Metabolism; Metabolism of Terpenoids and Polyketides; Biosynthesis of siderophore group nonribosomal peptides
Biosynthesis of type II polyketide backbone	0	0	0	0	0	0	0	0	0	0	0	0	0	0	0	0	0	0	0	0	0	0	0	0	0	0	0	0	0	0	0	0	Metabolism; Metabolism of Terpenoids and Polyketides; Biosynthesis of type II polyketide backbone
Biosynthesis of type II polyketide products	0	0	0	0	0	0	0	0	0	0	0	0	0	0	0	0	0	0	4	0	2	1	0	0	3	0	2	5	0	5	26	0	Metabolism; Metabolism of Terpenoids and Polyketides; Biosynthesis of type II polyketide products
Biosynthesis of unsaturated fatty acids	20955	22742	15824	16283	21364	23163	21421	19272	16944	24478	21237	21251	16014	16033	10146	18768	23359	23514	14171	16033	25617	21606	20211	23645	24000	22979	28579	27041	18127	26175	28408	20262	Metabolism; Lipid Metabolism; Biosynthesis of unsaturated fatty acids
Biosynthesis of vancomycin group antibiotics	10263	10754	8656	8358	10814	10923	10214	9516	9495	11182	10529	11423	8330	10617	7667	10241	8643	8646	8949	9414	11721	10521	9243	11098	11541	12910	12198	10748	9832	10954	11540	9461	Metabolism; Metabolism of Terpenoids and Polyketides; Biosynthesis of vancomycin group antibiotics
Biotin metabolism	36168	40642	29183	21754	39302	40929	35978	31896	27178	41080	34081	36062	22372	26055	22306	28718	24408	22788	25574	28398	43800	38474	32372	41492	41040	39000	52844	47137	30393	44769	49987	34330	Metabolism; Metabolism of Cofactors and Vitamins; Biotin metabolism
Bisphenol degradation	15679	17019	12132	14383	15948	17027	16314	13051	12084	17466	15606	16161	11474	12659	11126	13976	12723	12427	9610	13036	17290	14114	17014	18334	16332	16709	20220	19431	13328	18193	19617	17322	Metabolism; Xenobiotics Biodegradation and Metabolism; Bisphenol degradation
Bladder cancer	36	24	13	88	23	45	28	86	57	65	45	68	26	71	25	125	90	77	58	52	15	28	93	22	35	40	8	13	80	11	9	111	Human Diseases; Cancers; Bladder cancer
Butanoate metabolism	108644	119042	93655	90620	115027	124005	113571	101423	94421	123127	110054	106305	95617	86092	63454	96971	87644	83679	82746	88238	124679	105215	106207	122396	120498	110427	133730	130642	102670	129461	133086	106618	Metabolism; Carbohydrate Metabolism; Butanoate metabolism
Butirosin and neomycin biosynthesis	14945	16293	11942	11263	15856	16306	15350	12648	12057	16836	13983	13444	10374	11830	8828	12308	11645	11384	10710	12102	18909	15145	12988	16367	17797	13165	20456	18325	12797	17511	20019	13608	Metabolism; Biosynthesis of Other Secondary Metabolites; Butirosin and neomycin biosynthesis
C5-Branched dibasic acid metabolism	59138	66125	45436	41376	62402	65888	60681	54253	49702	69578	63560	66658	44268	49975	34356	58658	42472	39045	41313	48385	74484	59063	58814	68614	70400	75951	82030	76465	52560	72515	81376	53916	Metabolism; Carbohydrate Metabolism; C5-Branched dibasic acid metabolism
CAM ligands	0	0	0	0	0	0	0	0	0	0	0	0	0	0	0	0	0	0	0	0	0	0	0	0	0	0	0	0	0	0	0	0	Environmental Information Processing; Signaling Molecules and Interaction; CAM ligands
Caffeine metabolism	0	18	6	18	22	19	2	13	1	4	4	0	1	11	2	17	906	1033	34	9	25	66	8	2	12	4	18	11	0	71	8	1	Metabolism; Biosynthesis of Other Secondary Metabolites; Caffeine metabolism
Calcium signaling pathway	0	0	0	0	0	0	0	0	0	1	0	0	0	0	0	0	0	0	0	0	0	0	0	0	0	0	0	0	0	0	0	0	Environmental Information Processing; Signal Transduction; Calcium signaling pathway
Caprolactam degradation	7640	7981	5064	6564	7461	9847	7540	5961	5438	8668	6392	5264	6347	3709	2550	4425	7062	6992	4190	4725	7425	6230	7260	8443	7474	3839	8489	8672	6506	9525	8148	6969	Metabolism; Xenobiotics Biodegradation and Metabolism; Caprolactam degradation
Carbohydrate digestion and absorption	1573	1293	1100	1538	1306	1031	1338	634	825	1113	786	1266	862	1419	852	1443	868	848	778	1237	2330	1329	565	957	2142	1251	1593	1100	996	1422	1975	1243	Organismal Systems; Digestive System; Carbohydrate digestion and absorption
Carbohydrate metabolism	31526	34990	22873	22813	33509	35172	31947	29504	25671	37853	35537	38130	24987	24269	20597	31219	20828	19448	19548	26871	41186	29722	35747	39953	39500	37977	44249	39800	29264	39629	44087	31276	Unclassified; Metabolism; Carbohydrate metabolism
Carbon fixation in photosynthetic organisms	109145	118437	87896	82412	112909	117745	108370	95899	88090	119238	106384	113004	83830	89769	75026	96492	79444	75869	78956	92650	128200	106820	108375	122788	122454	113692	141811	130387	94212	127822	138664	103051	Metabolism; Energy Metabolism; Carbon fixation in photosynthetic organisms
Carbon fixation pathways in prokaryotes	169835	183759	154359	132814	179194	184888	171721	158268	147782	182086	166899	176763	138597	145956	118124	157961	138603	134247	142333	145564	196615	171910	159785	184744	190053	181150	212761	194035	155849	198397	207139	158260	Metabolism; Energy Metabolism; Carbon fixation pathways in prokaryotes
Cardiac muscle contraction	240	523	1404	407	802	662	297	857	183	182	192	231	243	205	381	144	182	292	156	135	593	324	259	313	530	285	633	407	672	861	621	395	Organismal Systems; Circulatory System; Cardiac muscle contraction
Carotenoid biosynthesis	164	182	142	271	193	287	128	200	168	173	158	204	246	201	43	225	1043	1229	176	213	284	270	217	177	190	234	215	195	216	360	178	111	Metabolism; Metabolism of Terpenoids and Polyketides; Carotenoid biosynthesis
Cell cycle	0	0	0	0	0	0	0	0	0	0	0	0	0	0	0	0	0	0	0	0	0	0	0	0	0	0	0	0	0	0	0	0	Cellular Processes; Cell Growth and Death; Cell cycle
Cell cycle - Caulobacter	99833	108346	81614	73231	103392	108565	99867	86629	78867	109522	94105	98049	73994	75937	59255	82339	66068	62251	70429	80462	116270	98131	92988	111783	110478	99423	132307	120691	83946	118268	128395	92806	Cellular Processes; Cell Growth and Death; Cell cycle - Caulobacter
Cell cycle - yeast	0	0	0	0	0	0	0	0	0	0	0	0	0	0	0	0	0	0	0	0	0	0	0	0	0	0	0	0	0	0	0	0	Cellular Processes; Cell Growth and Death; Cell cycle - yeast
Cell division	12181	12991	11576	9925	12887	13103	11819	11591	11430	12473	13067	16291	10075	12387	10883	13380	9711	9162	11883	11425	13151	12472	12451	13181	13150	19451	14090	12253	11494	13132	12960	11229	Unclassified; Cellular Processes and Signaling; Cell division
Cell motility and secretion	19766	21796	21947	18625	22795	22887	19082	20889	19124	19438	20147	21446	18893	20517	18402	20073	31178	32461	20367	19735	21469	21883	20821	20995	21648	20849	21518	19987	20934	23612	20561	19538	Unclassified; Cellular Processes and Signaling; Cell motility and secretion
Cellular antigens	5267	4672	6560	6516	5152	5244	4200	4554	5061	3669	3948	4638	4274	5495	7127	5025	6334	6353	6408	6259	3757	5595	4782	3908	4099	4031	3841	3329	5118	3994	3040	4036	Environmental Information Processing; Signaling Molecules and Interaction; Cellular antigens
Chagas disease (American trypanosomiasis)	43	51	85	145	57	92	37	95	66	83	61	93	103	95	21	145	1031	1171	98	92	32	97	141	28	21	51	27	20	88	83	37	116	Human Diseases; Infectious Diseases; Chagas disease (American trypanosomiasis)
Chaperones and folding catalysts	171244	182978	147546	132636	178141	182252	168643	151902	142122	181770	165585	177665	131783	145890	122913	154227	136696	132202	137378	147437	196826	173753	162919	186359	189467	185664	215646	196234	151619	196285	209068	160295	Genetic Information Processing; Folding, Sorting and Degradation; Chaperones and folding catalysts
Chloroalkane and chloroalkene degradation	41121	44458	30529	30405	41809	44821	43059	39203	33990	49923	43815	43386	33440	29479	20046	36600	25701	23576	24982	30760	48303	36741	40522	49202	45067	47745	55860	53228	36959	49422	55294	40067	Metabolism; Xenobiotics Biodegradation and Metabolism; Chloroalkane and chloroalkene degradation
Chlorocyclohexane and chlorobenzene degradation	1223	1155	1095	1895	1118	1336	1077	1340	1310	1438	1801	2280	1396	1574	634	2167	3004	3034	806	1023	1241	1085	1741	1239	1234	3854	967	1372	1568	1333	954	1191	Metabolism; Xenobiotics Biodegradation and Metabolism; Chlorocyclohexane and chlorobenzene degradation
Cholinergic synapse	0	0	0	0	0	0	0	0	0	0	0	0	0	0	0	0	0	0	0	0	0	0	0	0	0	0	0	0	0	0	0	0	Organismal Systems; Nervous System; Cholinergic synapse
Chromosome	269449	291972	228411	210294	282509	292206	272627	243231	225859	295565	267037	279262	218455	221317	176499	242112	194409	185480	204915	227031	320492	271456	258261	300845	306804	289868	346589	318918	239219	316223	342494	255978	Genetic Information Processing; Replication and Repair; Chromosome
Chronic myeloid leukemia	0	0	0	0	0	0	0	0	0	0	0	0	0	0	0	0	0	0	0	0	0	0	0	0	0	0	0	0	0	0	0	0	Human Diseases; Cancers; Chronic myeloid leukemia
Circadian rhythm - plant	40	42	31	42	41	61	31	60	56	37	40	88	23	75	4	186	943	1085	59	67	31	97	33	15	19	69	33	21	71	79	16	21	Organismal Systems; Environmental Adaptation; Circadian rhythm - plant
Citrate cycle (TCA cycle)	95004	101446	90879	78502	99596	102402	92765	89399	85701	97029	90951	95507	77016	86634	72209	90666	87896	86519	87151	84986	105375	99794	86136	97812	102913	93972	113230	102604	88262	106513	109387	87704	Metabolism; Carbohydrate Metabolism; Citrate cycle (TCA cycle)
Clavulanic acid biosynthesis	0	0	0	0	0	0	0	0	0	0	0	0	0	0	0	0	0	0	0	0	0	0	0	0	0	0	0	0	0	0	0	0	Metabolism; Biosynthesis of Other Secondary Metabolites; Clavulanic acid biosynthesis
Colorectal cancer	4	2	2	126	3	23	3	54	35	39	4	4	16	8	5	9	36	52	10	9	15	30	90	12	6	7	18	10	7	17	52	11	Human Diseases; Cancers; Colorectal cancer
Complement and coagulation cascades	0	0	0	0	0	0	0	0	0	0	0	0	0	0	0	0	0	0	0	0	0	0	0	0	0	0	0	0	0	0	0	0	Organismal Systems; Immune System; Complement and coagulation cascades
Cyanoamino acid metabolism	42841	48012	39423	37118	48985	50682	42907	41502	40052	47597	49321	49217	36355	40699	35311	45512	37107	35134	38362	41891	52598	48168	48710	49329	51598	53482	53486	51063	43223	49835	53358	41365	Metabolism; Metabolism of Other Amino Acids; Cyanoamino acid metabolism
Cysteine and methionine metabolism	173937	192795	140407	123659	184768	194035	177884	156536	139844	197323	170527	173482	132894	134341	111319	146651	128531	123022	126058	143409	206758	178770	171615	201713	196018	174341	236435	219853	152025	211518	231571	170963	Metabolism; Amino Acid Metabolism; Cysteine and methionine metabolism
Cytochrome P450	0	0	0	0	0	0	0	0	0	0	0	0	0	0	0	0	0	0	0	0	0	0	0	0	0	0	0	0	0	0	0	0	Metabolism; Enzyme Families; Cytochrome P450
Cytokine receptors	0	0	0	0	0	0	0	0	0	0	0	0	0	0	0	0	0	0	0	0	0	0	0	0	0	0	0	0	0	0	0	0	Environmental Information Processing; Signaling Molecules and Interaction; Cytokine receptors
Cytokine-cytokine receptor interaction	0	0	0	0	0	0	0	0	0	0	0	0	0	0	0	0	0	0	0	0	0	0	0	0	0	0	0	0	0	0	0	0	Environmental Information Processing; Signaling Molecules and Interaction; Cytokine-cytokine receptor interaction
Cytoskeleton proteins	73217	81923	57206	52117	77390	81178	76221	62989	56980	83822	71765	77253	55009	56971	41405	65576	45960	42479	47705	58732	93569	72725	70542	84920	87512	81062	102854	94178	61159	91039	103643	69446	Cellular Processes; Cell Motility; Cytoskeleton proteins
Cytosolic DNA-sensing pathway	0	0	0	0	0	0	0	0	0	0	0	0	0	0	0	0	0	0	0	0	0	0	0	0	0	0	0	0	0	0	0	0	Organismal Systems; Immune System; Cytosolic DNA-sensing pathway
D-Alanine metabolism	18661	20119	16029	15787	19426	19880	19400	16739	15689	20464	18213	18730	15451	15762	11766	16933	14045	13232	13555	15825	21736	17980	18110	20590	20722	19202	23286	22097	17125	21426	23152	18118	Metabolism; Metabolism of Other Amino Acids; D-Alanine metabolism
D-Arginine and D-ornithine metabolism	632	432	493	1280	471	543	526	536	638	704	717	458	959	542	373	556	205	235	171	475	464	205	576	608	517	548	284	330	700	337	239	628	Metabolism; Metabolism of Other Amino Acids; D-Arginine and D-ornithine metabolism
D-Glutamine and D-glutamate metabolism	25606	28250	22746	19451	27521	27867	26455	23356	21838	27780	24914	26324	20177	22419	18066	23059	20817	19709	21387	22673	29683	26955	25197	28554	28369	26440	33236	30840	23495	30030	32408	24986	Metabolism; Metabolism of Other Amino Acids; D-Glutamine and D-glutamate metabolism
DNA repair and recombination proteins	496093	535979	416993	380057	513711	536910	500687	443157	411261	542931	486511	512335	391822	407722	324442	443731	370769	355743	371770	417478	576432	495071	478225	553503	551830	528159	638423	590591	436229	579973	626570	468492	Genetic Information Processing; Replication and Repair; DNA repair and recombination proteins
DNA replication	127026	138431	106554	93818	132151	139016	128090	111181	102595	138157	120194	126594	96885	100550	81967	106944	89426	84322	93775	105805	147751	127149	121599	142640	141247	124937	167026	154122	109590	150158	162836	120191	Genetic Information Processing; Replication and Repair; DNA replication
DNA replication proteins	236970	258023	198120	174095	246675	259016	238222	207490	190659	258240	225400	236756	179093	187683	154085	198768	169364	159830	174634	196218	275973	238331	227771	266290	263597	238050	311884	288523	204386	280487	304274	224574	Genetic Information Processing; Replication and Repair; DNA replication proteins
Dilated cardiomyopathy (DCM)	0	0	0	0	0	0	0	0	0	0	0	0	0	0	0	0	0	0	0	0	0	0	0	0	0	0	0	0	0	0	0	0	Human Diseases; Cardiovascular Diseases; Dilated cardiomyopathy (DCM)
Dioxin degradation	12818	14110	8924	8405	12904	13333	13917	11403	9494	15894	12623	13606	9574	7708	5232	11092	5269	4521	6892	8693	16808	10238	11427	15768	15239	14333	19122	16803	10989	16043	19277	12705	Metabolism; Xenobiotics Biodegradation and Metabolism; Dioxin degradation
Drug metabolism - cytochrome P450	2104	2388	2621	4003	2370	3114	2843	2385	2374	2912	2497	2538	2696	2047	626	3210	4229	4562	1588	2114	3061	1498	2187	2045	2906	2525	2199	1993	2383	2753	2408	1692	Metabolism; Xenobiotics Biodegradation and Metabolism; Drug metabolism - cytochrome P450
Drug metabolism - other enzymes	63370	67521	50443	49252	64292	68141	63834	54812	51884	70654	60894	60797	46804	48428	40018	53459	42459	39886	45325	51957	73109	60904	60553	71177	69818	60500	82307	76238	54939	72361	79985	58755	Metabolism; Xenobiotics Biodegradation and Metabolism; Drug metabolism - other enzymes
ECM-receptor interaction	0	0	0	0	0	0	0	0	0	0	0	0	0	0	0	0	0	0	0	0	0	0	0	0	0	0	0	0	0	0	0	0	Environmental Information Processing; Signaling Molecules and Interaction; ECM-receptor interaction
Electron transfer carriers	2788	3793	3203	2923	3685	4161	3146	3605	2852	3035	3026	3137	4029	4267	2129	3482	2847	2862	2659	3363	2540	2230	3711	3857	2740	2323	2313	2520	3699	3517	2276	3553	Unclassified; Cellular Processes and Signaling; Electron transfer carriers
Endocrine and other factor-regulated calcium reabsorption	0	0	0	0	0	0	0	0	0	0	0	0	0	0	0	0	0	0	0	0	0	0	0	0	0	0	0	0	0	0	0	0	Organismal Systems; Excretory System; Endocrine and other factor-regulated calcium reabsorption
Endocytosis	0	4	0	62	1	12	0	19	0	4	0	0	0	2	1	0	10	17	25	0	0	0	49	0	0	0	0	18	1	0	1	0	Cellular Processes; Transport and Catabolism; Endocytosis
Energy metabolism	145167	159036	131356	117833	155801	158837	147213	136928	132590	155724	145716	159463	123836	133332	108322	142146	124006	118240	130394	133083	171687	150068	147442	161218	167859	159035	178844	165316	139359	168058	175693	136977	Unclassified; Metabolism; Energy metabolism
Epithelial cell signaling in Helicobacter pylori infection	16691	18175	14510	11527	18037	17919	16604	16334	14259	18985	18036	19582	13025	14904	9948	16517	11435	10620	12266	13820	20597	16596	16037	19162	19626	22608	22291	20063	16001	20008	21676	15029	Human Diseases; Infectious Diseases; Epithelial cell signaling in Helicobacter pylori infection
ErbB signaling pathway	0	0	0	0	0	0	0	0	0	0	0	0	0	0	0	0	0	0	0	0	0	0	0	0	0	0	0	0	0	0	0	0	Environmental Information Processing; Signal Transduction; ErbB signaling pathway
Ether lipid metabolism	110	91	72	176	99	165	96	99	88	107	88	35	159	26	22	22	32	42	86	42	75	42	122	96	95	26	42	76	110	124	33	56	Metabolism; Lipid Metabolism; Ether lipid metabolism
Ethylbenzene degradation	6531	5925	7088	9366	6179	5976	6948	5379	6357	5771	5673	5452	5983	5403	6179	6100	8068	7820	6191	5769	6206	5774	6174	5743	6298	5260	5027	5750	7099	5861	5508	7484	Metabolism; Xenobiotics Biodegradation and Metabolism; Ethylbenzene degradation
Fat digestion and absorption	0	0	0	0	0	0	0	0	0	0	0	0	0	0	0	0	0	0	0	0	0	0	0	0	0	0	0	0	0	0	0	0	Organismal Systems; Digestive System; Fat digestion and absorption
Fatty acid biosynthesis	89340	98437	73675	67083	92878	97413	94619	78407	70956	100806	86207	90606	64873	69140	50706	78361	65973	63269	61206	69526	111154	88315	84406	100968	104471	95646	123490	113109	76800	110190	122139	86080	Metabolism; Lipid Metabolism; Fatty acid biosynthesis
Fatty acid elongation in mitochondria	0	18	6	12	22	16	2	12	1	0	4	0	1	11	2	17	900	1028	33	9	24	66	2	1	12	4	18	10	0	71	8	1	Metabolism; Lipid Metabolism; Fatty acid elongation in mitochondria
Fatty acid metabolism	46027	49024	35567	35454	46499	53616	46950	41152	37954	53697	44879	41801	40461	32679	21756	37507	33620	32403	32492	34779	50639	41756	42762	51074	48837	43691	56680	55219	41142	55045	55384	41723	Metabolism; Lipid Metabolism; Fatty acid metabolism
Fc epsilon RI signaling pathway	0	0	0	0	0	0	0	0	0	0	0	0	0	0	0	0	0	0	0	0	0	0	0	0	0	0	0	0	0	0	0	0	Organismal Systems; Immune System; Fc epsilon RI signaling pathway
Fc gamma R-mediated phagocytosis	0	4	0	62	1	12	0	19	0	4	0	0	0	2	1	0	10	17	25	0	0	0	49	0	0	0	0	18	1	0	1	0	Organismal Systems; Immune System; Fc gamma R-mediated phagocytosis
Flagellar assembly	53696	55576	59325	62110	65115	61762	57177	75477	67172	68341	69290	51132	81238	39322	21356	64487	33463	35328	46691	42925	82387	47499	37718	58688	82095	54913	53649	50566	69689	63410	64931	42564	Cellular Processes; Cell Motility; Flagellar assembly
Flavone and flavonol biosynthesis	978	828	735	1527	1112	1320	818	1183	1221	1298	1638	744	1154	687	307	1085	640	620	618	831	1269	910	946	1096	1380	991	647	902	1357	758	763	648	Metabolism; Biosynthesis of Other Secondary Metabolites; Flavone and flavonol biosynthesis
Flavonoid biosynthesis	819	610	719	1115	759	871	779	1090	1185	1146	1401	798	1410	1234	135	1051	1117	1254	583	733	820	646	719	894	1017	699	383	470	1364	691	382	491	Metabolism; Biosynthesis of Other Secondary Metabolites; Flavonoid biosynthesis
Fluorobenzoate degradation	28	77	47	165	96	92	11	109	51	64	59	169	56	109	41	139	1997	2211	205	113	86	264	140	59	45	79	94	52	98	242	69	199	Metabolism; Xenobiotics Biodegradation and Metabolism; Fluorobenzoate degradation
Focal adhesion	0	0	0	0	0	0	0	0	0	0	0	0	0	0	0	0	0	0	0	0	0	0	0	0	0	0	0	0	0	0	0	0	Cellular Processes; Cell Communication; Focal adhesion
Folate biosynthesis	76691	82412	64629	53717	79245	82268	76739	68173	61260	84471	73739	73403	54312	61333	46824	63416	57995	56637	58139	61973	87022	78269	67321	83432	82678	77084	102557	92442	65277	89255	96185	71147	Metabolism; Metabolism of Cofactors and Vitamins; Folate biosynthesis
Fructose and mannose metabolism	214210	235197	151099	150028	215142	231358	215690	167174	148052	243868	194508	208843	138507	154840	119563	164035	127606	117794	117626	161724	254013	200483	207402	245993	236508	221936	303542	280118	165870	257472	291603	213172	Metabolism; Carbohydrate Metabolism; Fructose and mannose metabolism
Function unknown	193794	208068	168311	168537	205150	213658	195170	185960	173238	216030	205278	211375	170064	163874	131434	187648	171310	166922	154925	168662	224871	189715	194137	218354	218656	226536	234684	218618	185171	221075	231332	188211	Unclassified; Poorly Characterized; Function unknown
G protein-coupled receptors	22	85	234	276	109	240	85	30	71	76	13	9	94	9	12	40	113	108	51	118	6	36	8	19	11	44	10	29	14	39	13	15	Environmental Information Processing; Signaling Molecules and Interaction; G protein-coupled receptors
GTP-binding proteins	0	0	0	0	0	0	0	0	0	0	0	0	0	0	0	0	0	0	0	0	0	0	0	0	0	0	0	0	0	0	0	0	Environmental Information Processing; Signaling Molecules and Interaction; GTP-binding proteins
Galactose metabolism	140243	154253	107434	103375	147060	153959	140370	119037	112441	158412	140285	152861	101823	112096	93583	123516	93855	87543	98871	118230	167938	137053	144324	165406	160935	161314	188443	170540	121731	164476	180474	136138	Metabolism; Carbohydrate Metabolism; Galactose metabolism
Gastric acid secretion	0	0	0	0	0	0	0	0	0	0	0	0	0	0	0	0	0	0	0	0	0	0	0	0	0	0	0	0	0	0	0	0	Organismal Systems; Digestive System; Gastric acid secretion
General function prediction only	604930	655799	500155	463105	635005	664204	609615	553569	505835	674562	615108	646751	486923	513393	405092	565027	477182	458100	455596	520678	715885	604405	599472	680898	684303	688136	782175	727075	546019	712135	769206	572891	Unclassified; Poorly Characterized; General function prediction only
Geraniol degradation	7573	6823	6606	8157	7207	9412	6669	7251	7636	7021	7368	5858	9061	5911	5417	6880	9802	9706	7488	6291	5761	6321	7965	6530	6696	4745	4348	5678	8369	8121	4489	5741	Metabolism; Metabolism of Terpenoids and Polyketides; Geraniol degradation
Germination	7770	9829	7655	6889	9335	10964	8950	9883	8860	10776	10759	10441	10656	6571	3970	9205	5325	4692	6831	7150	10633	8652	9407	10281	10020	12376	11128	11256	7200	10950	12285	7559	Unclassified; Cellular Processes and Signaling; Germination
Glioma	0	0	0	0	0	0	0	0	0	0	0	0	0	0	0	0	0	0	0	0	0	0	0	0	0	0	0	0	0	0	0	0	Human Diseases; Cancers; Glioma
Glutamatergic synapse	17142	18878	14442	12882	18042	18371	17893	15910	15046	19302	18518	19628	14172	15929	12468	18104	15251	14696	13953	15537	21130	17994	18319	19220	20181	21355	22769	21382	15840	20543	22840	16258	Organismal Systems; Nervous System; Glutamatergic synapse
Glutathione metabolism	25729	26869	25289	26275	27059	28838	26095	25237	23182	26853	25528	27732	23156	22427	23125	25488	26975	27612	22251	23714	27239	25467	26833	27577	26635	28321	28511	26852	25139	28723	28249	26629	Metabolism; Metabolism of Other Amino Acids; Glutathione metabolism
Glycan bindng proteins	0	0	0	0	0	0	0	0	0	0	0	0	0	0	0	0	0	0	0	0	0	0	0	0	0	0	0	0	0	0	0	0	Environmental Information Processing; Signaling Molecules and Interaction; Glycan bindng proteins
Glycan biosynthesis and metabolism	3774	3652	4685	3450	4173	3596	3578	4392	3906	3367	3156	3738	3973	3371	3633	3748	3401	3385	4889	3732	4079	3538	2616	3489	4088	3029	3559	2640	4382	3938	3420	3695	Unclassified; Metabolism; Glycan biosynthesis and metabolism
Glycerolipid metabolism	80629	90213	61479	60894	84625	90745	83687	67607	61886	93208	76921	82866	58480	56264	48374	65984	50402	46925	48353	62742	99140	74600	80695	97398	94327	82277	111154	100745	68717	98883	108222	78844	Metabolism; Lipid Metabolism; Glycerolipid metabolism
Glycerophospholipid metabolism	103029	115471	84357	73976	110508	116222	104936	92271	81756	116226	101627	106883	78370	85427	63949	88538	80491	76219	73494	85378	125332	105639	101648	118661	118724	110190	141251	131113	89558	127069	139070	100380	Metabolism; Lipid Metabolism; Glycerophospholipid metabolism
Glycine, serine and threonine metabolism	148053	160577	121684	112412	154803	162608	146681	131567	120152	163535	145157	147634	108487	121091	94167	127072	117953	113247	111470	123384	169638	151898	142461	164208	162352	155534	192569	179619	129968	171842	185073	139095	Metabolism; Amino Acid Metabolism; Glycine, serine and threonine metabolism
Glycolysis / Gluconeogenesis	203039	222832	160733	151029	210467	223865	207767	178455	162472	229708	199009	203695	154931	159192	120840	177109	144487	137751	137200	165115	243810	198620	193203	229847	230849	209168	271999	251516	173606	242143	267918	192504	Metabolism; Carbohydrate Metabolism; Glycolysis / Gluconeogenesis
Glycosaminoglycan biosynthesis - chondroitin sulfate	0	0	0	0	0	0	0	0	0	0	0	0	0	0	0	0	0	0	0	0	0	0	0	0	0	0	0	0	0	0	0	0	Metabolism; Glycan Biosynthesis and Metabolism; Glycosaminoglycan biosynthesis - chondroitin sulfate
Glycosaminoglycan degradation	14434	13735	14001	13011	14563	13755	12296	11205	13290	12416	11060	11579	8835	14878	15569	10670	19901	20667	17569	14554	12818	15655	12019	13152	13235	9715	14739	11781	13387	12385	11648	12361	Metabolism; Glycan Biosynthesis and Metabolism; Glycosaminoglycan degradation
Glycosphingolipid biosynthesis - ganglio series	11433	11090	10890	9295	11411	10508	9904	8438	9990	9806	7996	8927	6350	12090	10931	7561	12095	12098	13525	10969	10114	12239	9083	10478	10307	7029	12451	9768	10025	9989	9770	9963	Metabolism; Glycan Biosynthesis and Metabolism; Glycosphingolipid biosynthesis - ganglio series
Glycosphingolipid biosynthesis - globo series	31158	32125	24806	23664	31547	31851	29336	24388	24985	33165	26774	26112	18594	23935	18867	21967	20955	19684	24194	24760	34437	30262	25400	33320	33335	25022	39694	34189	26721	32608	35724	26847	Metabolism; Glycan Biosynthesis and Metabolism; Glycosphingolipid biosynthesis - globo series
Glycosphingolipid biosynthesis - lacto and neolacto series	0	0	0	0	0	0	0	0	0	0	0	0	1	0	0	0	0	0	0	0	0	0	0	0	0	0	0	0	0	0	0	0	Metabolism; Glycan Biosynthesis and Metabolism; Glycosphingolipid biosynthesis - lacto and neolacto series
Glycosylphosphatidylinositol(GPI)-anchor biosynthesis	0	0	0	0	0	0	0	0	0	0	0	0	0	0	0	0	0	0	0	0	0	0	0	0	0	0	0	0	0	0	0	0	Metabolism; Glycan Biosynthesis and Metabolism; Glycosylphosphatidylinositol(GPI)-anchor biosynthesis
Glycosyltransferases	49081	50125	41845	41079	50032	50790	48040	45904	42389	51858	50071	51508	42088	42400	36234	45878	47525	47862	40705	42215	53308	49901	45974	52368	51674	56931	57083	52980	45153	53860	55720	48662	Metabolism; Glycan Biosynthesis and Metabolism; Glycosyltransferases
Glyoxylate and dicarboxylate metabolism	100882	113264	78721	69222	108577	117071	101128	88773	77258	116824	99734	101250	70573	76405	56729	84953	76227	70226	67322	81938	123059	103397	99896	116454	116259	106556	141411	132694	87600	125298	136944	95446	Metabolism; Carbohydrate Metabolism; Glyoxylate and dicarboxylate metabolism
GnRH signaling pathway	0	4	0	62	1	12	0	19	0	4	0	0	0	2	1	0	10	17	25	0	0	0	49	0	0	0	0	18	1	0	1	0	Organismal Systems; Endocrine System; GnRH signaling pathway
Hedgehog signaling pathway	0	0	0	0	0	0	0	0	0	0	0	0	0	0	0	0	0	0	0	0	0	0	0	0	0	0	0	0	0	0	0	0	Environmental Information Processing; Signal Transduction; Hedgehog signaling pathway
Hematopoietic cell lineage	0	0	0	0	0	0	0	0	0	0	0	0	0	0	0	0	0	0	0	0	0	0	0	0	0	0	0	0	0	0	0	0	Organismal Systems; Immune System; Hematopoietic cell lineage
Hepatitis C	0	0	0	0	0	0	0	0	0	0	0	0	0	0	0	0	0	0	0	0	0	0	0	0	0	0	0	0	0	0	0	0	Human Diseases; Infectious Diseases; Hepatitis C
Histidine metabolism	109085	121088	92379	82118	117161	121658	112126	98351	93265	122236	109515	117148	86461	95954	71372	104591	85595	81271	87972	97767	134606	113924	108020	122889	128757	120815	146059	134157	98920	130247	143879	101549	Metabolism; Amino Acid Metabolism; Histidine metabolism
Homologous recombination	161891	175024	140545	125706	168834	174297	163736	145150	137269	174748	157571	166892	130580	135132	107272	147187	118340	112658	126778	138667	190275	163020	153157	178219	182688	169745	206355	189733	144176	188169	203507	150862	Genetic Information Processing; Replication and Repair; Homologous recombination
Huntington's disease	2943	3655	5362	4129	4241	4592	3173	3973	3426	2855	2528	3378	3059	3088	4630	2877	5293	5877	4148	3539	2977	3368	3489	3518	3221	2720	3152	2673	3999	3826	2760	3548	Human Diseases; Neurodegenerative Diseases; Huntington's disease
Hypertrophic cardiomyopathy (HCM)	0	0	0	44	1	19	0	4	0	15	0	0	0	0	0	0	11	15	0	0	0	0	42	0	0	0	0	0	0	0	0	0	Human Diseases; Cardiovascular Diseases; Hypertrophic cardiomyopathy (HCM)
Indole alkaloid biosynthesis	0	0	0	17	0	1	0	7	0	12	0	0	0	0	0	0	2	3	0	0	0	0	12	1	1	0	0	0	0	0	0	0	Metabolism; Biosynthesis of Other Secondary Metabolites; Indole alkaloid biosynthesis
Influenza A	4	2	2	126	3	23	3	54	35	39	4	4	16	8	5	9	36	52	10	9	15	30	90	12	6	7	18	10	7	17	52	11	Human Diseases; Infectious Diseases; Influenza A
Inorganic ion transport and metabolism	24971	25893	21284	22865	25425	26715	23116	24000	22333	26063	26972	29493	21232	22311	19194	25509	30935	31575	21784	22165	25518	23849	26899	27598	25547	32529	27518	24771	23647	27189	25278	24979	Unclassified; Cellular Processes and Signaling; Inorganic ion transport and metabolism
Inositol phosphate metabolism	17267	18387	14138	15335	17438	18979	17365	16437	15423	20087	18729	16840	14463	13945	7575	15775	13274	12446	12339	13580	19591	16025	16121	19131	19217	18258	21160	20355	16449	19333	20362	15654	Metabolism; Carbohydrate Metabolism; Inositol phosphate metabolism
Insulin signaling pathway	15986	17890	12479	10858	16797	17238	16661	13242	12306	18130	15483	17628	10954	11660	8742	15387	10723	9921	10152	12864	22212	15416	15205	18234	20918	17369	23279	20425	13633	20445	23606	14266	Organismal Systems; Endocrine System; Insulin signaling pathway
Ion channels	1511	1022	1368	2401	1222	1078	1154	910	955	924	1198	1483	1275	2022	4456	1848	3928	4474	1069	2196	892	1503	1608	1096	857	1499	646	596	1441	767	780	2213	Environmental Information Processing; Signaling Molecules and Interaction; Ion channels
Isoflavonoid biosynthesis	0	0	0	0	0	0	0	0	0	0	0	0	0	0	0	0	0	0	0	0	0	0	0	0	0	0	0	1	0	0	0	0	Metabolism; Biosynthesis of Other Secondary Metabolites; Isoflavonoid biosynthesis
Isoquinoline alkaloid biosynthesis	8510	8948	7067	6706	8727	9354	8097	8023	7012	8924	8381	8469	7010	7504	7474	7730	8583	8836	7422	7849	8614	8917	8749	9219	8282	8694	10148	9704	7293	9494	9662	8541	Metabolism; Biosynthesis of Other Secondary Metabolites; Isoquinoline alkaloid biosynthesis
Leishmaniasis	0	0	0	0	0	0	0	0	0	0	0	0	0	0	0	0	0	0	0	0	0	0	0	0	0	0	0	0	0	0	0	0	Human Diseases; Infectious Diseases; Leishmaniasis
Leukocyte transendothelial migration	0	0	0	0	0	0	0	0	0	0	0	0	0	0	0	0	0	0	0	0	0	0	0	0	0	0	0	0	0	0	0	0	Organismal Systems; Immune System; Leukocyte transendothelial migration
Limonene and pinene degradation	13584	13063	13838	18185	13480	14690	13481	13296	13949	13030	14227	14064	14585	12161	12219	14128	16582	16452	12436	11937	12166	11302	15283	13639	13059	13160	9989	11291	15719	13584	10316	14073	Metabolism; Metabolism of Terpenoids and Polyketides; Limonene and pinene degradation
Linoleic acid metabolism	14029	15202	10561	12117	14140	15257	14842	11233	10758	15949	13318	13776	10100	10222	9134	11773	10289	9939	8655	11201	15840	12902	13971	16076	14830	15159	18662	17829	11277	16243	18150	15067	Metabolism; Lipid Metabolism; Linoleic acid metabolism
Lipid biosynthesis proteins	114829	123049	91919	85768	116995	124515	116733	101016	93376	127667	108615	107749	88006	87518	62919	95040	82662	80092	82697	89300	136072	113591	102838	126515	129578	108271	150966	138617	97953	136478	148535	105842	Metabolism; Lipid Metabolism; Lipid biosynthesis proteins
Lipid metabolism	26620	29325	19931	18814	27433	29616	27435	24311	21195	31795	28092	27859	20891	20574	12010	23921	17338	16079	16079	20057	33038	25519	25062	30937	30751	32072	37154	34732	22045	32939	37218	24614	Unclassified; Metabolism; Lipid metabolism
Lipoic acid metabolism	4058	4024	4703	4816	4368	4360	4001	4032	4847	3437	3371	3459	3517	4306	2133	3453	5832	5820	5668	4073	3503	4507	3257	3559	3805	3129	3391	3189	4746	3472	2642	3903	Metabolism; Metabolism of Cofactors and Vitamins; Lipoic acid metabolism
Lipopolysaccharide biosynthesis	27753	25389	36915	28228	29331	25592	22013	26823	26314	18776	21250	24527	20048	29159	32729	25408	41107	43051	34050	29408	22847	29556	20108	21681	24442	19731	22612	16034	29268	25535	17103	23446	Metabolism; Glycan Biosynthesis and Metabolism; Lipopolysaccharide biosynthesis
Lipopolysaccharide biosynthesis proteins	40406	38992	49366	40858	43476	40236	34515	40576	38978	32866	37069	39848	32352	40328	42996	38166	53038	54521	45668	41493	36236	42095	34962	36947	38141	35027	36600	28864	43271	39395	29960	37873	Metabolism; Glycan Biosynthesis and Metabolism; Lipopolysaccharide biosynthesis proteins
Long-term depression	0	0	0	0	0	0	0	0	0	0	0	0	0	0	0	0	0	0	0	0	0	0	0	0	0	0	0	0	0	0	0	0	Organismal Systems; Nervous System; Long-term depression
Long-term potentiation	0	0	0	0	0	0	0	0	0	0	0	0	0	0	0	0	0	0	0	0	0	0	0	0	0	0	0	0	0	0	0	0	Organismal Systems; Nervous System; Long-term potentiation
Lysine biosynthesis	165574	184886	130182	113404	174363	183732	170163	143889	129609	188789	163204	172845	116357	130009	99602	142567	112420	103664	113760	132878	200644	167148	162910	192242	188978	182540	232170	213510	139740	203122	226327	157824	Metabolism; Amino Acid Metabolism; Lysine biosynthesis
Lysine degradation	21427	23477	20303	19935	23494	27177	22212	21301	19544	24232	21834	21325	20813	17564	12579	19668	22890	22474	18260	18349	23693	21606	22917	23593	23635	20740	24620	25192	22384	26708	24444	20674	Metabolism; Amino Acid Metabolism; Lysine degradation
Lysosome	21048	19870	20474	21631	21499	20881	18083	18585	21568	19896	20207	19614	15934	22262	23622	18948	26958	28006	24105	21543	19271	20844	19524	20768	20553	18708	19778	16532	22199	17616	15826	17599	Cellular Processes; Transport and Catabolism; Lysosome
MAPK signaling pathway	0	0	0	0	0	0	0	0	0	0	0	0	0	0	0	0	0	0	0	0	0	0	0	0	0	0	0	0	0	0	0	0	Environmental Information Processing; Signal Transduction; MAPK signaling pathway
MAPK signaling pathway - yeast	7699	8884	6832	5800	8506	8886	7874	7243	7232	8714	7999	8360	5612	7815	6817	7297	7050	6703	7389	7666	8343	8252	8530	9142	8117	8517	10359	9545	7138	8917	9348	7685	Environmental Information Processing; Signal Transduction; MAPK signaling pathway - yeast
Measles	0	0	0	0	0	0	0	0	0	0	0	0	0	0	0	0	0	0	0	0	0	0	0	0	0	0	0	0	0	0	0	0	Human Diseases; Infectious Diseases; Measles
Meiosis - yeast	551	486	468	508	498	635	388	629	461	445	546	703	531	804	1808	1007	2383	2698	497	771	390	427	660	434	411	608	349	355	570	669	412	384	Cellular Processes; Cell Growth and Death; Meiosis - yeast
Melanogenesis	0	0	0	0	0	0	0	0	0	0	0	0	0	0	0	0	0	0	0	0	0	0	0	0	0	0	0	0	0	0	0	0	Organismal Systems; Endocrine System; Melanogenesis
Membrane and intracellular structural molecules	79119	79604	75055	65871	81608	79538	72147	69426	67006	75188	71553	75356	56719	65896	57257	65862	78332	77059	76573	69524	81042	84685	67565	76911	79557	79220	89187	77416	72184	81754	80933	72270	Unclassified; Cellular Processes and Signaling; Membrane and intracellular structural molecules
Metabolism of cofactors and vitamins	15163	16885	13591	12288	16298	17949	16652	14826	13037	17667	16092	18217	12690	13678	8617	16644	17830	18000	11713	12776	17635	16467	14893	16821	16459	24300	19695	19219	13609	18848	19690	15377	Unclassified; Metabolism; Metabolism of cofactors and vitamins
Metabolism of xenobiotics by cytochrome P450	1921	2142	2258	3527	2099	2628	2609	2186	2153	2678	2346	2391	2405	1906	588	2912	3119	3295	1398	1868	2928	1254	2035	1899	2755	2367	2081	1865	2166	2481	2314	1583	Metabolism; Xenobiotics Biodegradation and Metabolism; Metabolism of xenobiotics by cytochrome P450
Methane metabolism	245590	271944	194139	175078	258634	272101	249031	223715	201778	279351	253006	262935	189358	199706	136746	218812	161197	146193	173958	196658	295387	244267	244367	283122	282539	281526	329064	308200	216746	295519	321819	229936	Metabolism; Energy Metabolism; Methane metabolism
Mineral absorption	809	495	591	678	417	393	392	959	808	544	816	566	895	614	123	893	266	261	417	593	435	760	480	482	419	625	391	445	529	581	481	244	Organismal Systems; Digestive System; Mineral absorption
Mismatch repair	157680	172871	130530	114733	164655	171997	159798	137894	126574	172627	150392	160442	119445	124074	101620	134931	111093	104470	114460	130488	188097	159207	153069	178357	178828	160375	210811	193745	134940	189430	207322	149509	Genetic Information Processing; Replication and Repair; Mismatch repair
N-Glycan biosynthesis	2906	2503	2929	2991	2632	2528	2405	3348	3621	2680	3453	3851	3554	3756	2617	4232	4083	4489	3915	2925	2186	2791	2298	2456	2440	5183	1955	1667	3156	2262	1665	2117	Metabolism; Glycan Biosynthesis and Metabolism; N-Glycan biosynthesis
NOD-like receptor signaling pathway	8362	8877	6932	5817	8528	8625	8010	7088	6574	8768	7704	8457	5839	6824	6659	7420	6276	6033	6438	7316	9832	8622	7914	8944	9286	8534	11013	9860	6993	9697	10805	7393	Organismal Systems; Immune System; NOD-like receptor signaling pathway
Naphthalene degradation	27294	28494	22230	24226	27040	28729	28496	23576	22176	30190	26067	25765	21339	19617	17566	23533	22028	21356	18231	21439	30938	23215	25683	30225	29313	25093	33705	31515	24492	31135	33429	26620	Metabolism; Xenobiotics Biodegradation and Metabolism; Naphthalene degradation
Neuroactive ligand-receptor interaction	0	0	0	0	0	0	0	0	0	0	0	0	0	0	0	0	0	0	0	0	0	0	0	0	0	0	0	0	0	0	0	0	Environmental Information Processing; Signaling Molecules and Interaction; Neuroactive ligand-receptor interaction
Neurotrophin signaling pathway	0	0	0	0	0	0	0	0	0	0	0	0	0	0	0	0	0	0	0	0	0	0	0	0	0	0	0	0	0	0	0	0	Organismal Systems; Nervous System; Neurotrophin signaling pathway
Nicotinate and nicotinamide metabolism	73237	77414	62498	55913	75434	76573	71832	66032	60963	78063	70821	76765	57298	60247	50027	66095	48316	45405	56956	62291	83647	72823	68051	79745	80514	78079	91207	82228	66033	82464	89323	67790	Metabolism; Metabolism of Cofactors and Vitamins; Nicotinate and nicotinamide metabolism
Nitrogen metabolism	120078	131482	98315	86309	127657	133726	119781	114554	101254	134225	123695	127519	98380	100613	86131	107423	93021	88864	94707	103696	137981	123954	125069	139660	132007	129053	156770	146100	108505	143287	153582	118587	Metabolism; Energy Metabolism; Nitrogen metabolism
Nitrotoluene degradation	16212	19633	12069	7999	18196	20255	16658	17586	12901	20535	19060	20494	14723	14151	11100	15255	10861	10051	10914	12499	19986	16982	18199	21074	18474	24484	24607	23473	13483	22460	24515	17532	Metabolism; Xenobiotics Biodegradation and Metabolism; Nitrotoluene degradation
Non-homologous end-joining	214	468	601	855	403	766	395	287	386	329	234	161	308	388	74	625	3186	3668	294	449	196	516	337	143	176	376	237	214	219	506	192	186	Genetic Information Processing; Replication and Repair; Non-homologous end-joining
Notch signaling pathway	0	0	0	0	0	0	0	0	0	0	0	0	0	0	0	0	0	0	0	0	0	0	0	0	0	0	0	0	0	0	0	0	Environmental Information Processing; Signal Transduction; Notch signaling pathway
Novobiocin biosynthesis	23739	26097	19627	17203	25165	26138	23752	21875	19805	26411	23690	24363	19062	20067	15255	21469	18244	17663	19200	20468	27950	24658	23104	26721	26681	24849	31322	28932	20901	28221	30600	22491	Metabolism; Biosynthesis of Other Secondary Metabolites; Novobiocin biosynthesis
Nucleotide excision repair	76886	83741	62891	55462	79500	83481	77153	66620	60591	83858	72297	75858	57213	59275	46484	64105	55202	52662	54281	61727	90371	77255	72265	85876	85834	76156	102081	94140	64961	91775	100238	71697	Genetic Information Processing; Replication and Repair; Nucleotide excision repair
Nucleotide metabolism	8672	10604	7079	5482	10181	10237	9651	8007	6923	9513	7665	9124	7984	7692	4727	6817	7816	6349	7609	8269	11317	10085	10205	10548	10625	6638	12453	12321	8096	11741	12784	10172	Unclassified; Metabolism; Nucleotide metabolism
Olfactory transduction	0	0	0	0	0	0	0	0	0	0	0	0	0	0	0	0	0	0	0	0	0	0	0	0	0	0	0	0	0	0	0	0	Organismal Systems; Sensory System; Olfactory transduction
One carbon pool by folate	110763	117778	93508	86177	113606	116429	110263	97584	94157	117788	105777	109928	86615	90220	69709	96352	82541	78546	87943	93650	127441	112505	103275	120330	123411	109364	138082	126518	97946	125967	134760	100843	Metabolism; Metabolism of Cofactors and Vitamins; One carbon pool by folate
Oocyte meiosis	0	0	0	0	0	0	0	0	0	0	0	0	0	0	0	0	0	0	0	0	0	0	0	0	0	0	0	0	0	0	0	0	Cellular Processes; Cell Growth and Death; Oocyte meiosis
Other glycan degradation	46983	45819	44115	47403	48527	47324	41788	42170	47379	45665	49335	52173	37313	47559	48738	46902	45129	45319	49011	46627	46652	45349	47842	49633	49098	55069	45703	38778	48634	41978	39343	41306	Metabolism; Glycan Biosynthesis and Metabolism; Other glycan degradation
Other ion-coupled transporters	231427	256984	178793	162084	243246	261794	232823	193685	168302	259941	218743	221451	153632	173896	139546	181148	174516	160008	155101	190022	269508	234896	232416	266330	251674	225155	322628	304355	190359	281538	310629	230316	Unclassified; Cellular Processes and Signaling; Other ion-coupled transporters
Other transporters	47762	54378	36586	31722	51133	54963	49331	42127	36618	55290	46558	49691	34802	35921	30693	41181	35036	32833	32766	39944	59912	48750	49574	56617	56291	50763	68787	64111	40217	60867	67963	46724	Unclassified; Cellular Processes and Signaling; Other transporters
Other types of O-glycan biosynthesis	0	0	0	0	0	0	0	0	0	0	0	0	0	0	0	0	0	0	0	0	0	0	0	0	0	0	0	0	0	0	0	0	Metabolism; Glycan Biosynthesis and Metabolism; Other types of O-glycan biosynthesis
Others	163613	175094	129296	136809	169199	179777	164865	146078	132974	183744	165172	167824	133319	128122	109920	145916	132679	128951	112949	135197	192350	156739	164410	187077	184080	173110	207491	196695	147155	190364	206477	162842	Unclassified; Metabolism; Others
Oxidative phosphorylation	224319	247977	192411	158317	238493	246859	223939	198637	179331	243115	211953	234518	158613	179519	142165	193879	169714	159455	171941	183728	263741	232012	215451	252222	251500	243079	302804	275782	195424	271425	291984	211611	Metabolism; Energy Metabolism; Oxidative phosphorylation
PPAR signaling pathway	18519	18784	14575	14445	18008	19926	17807	17353	16709	20257	19134	18150	17490	15790	14199	16909	14502	14958	15541	15680	19245	17218	18069	20169	18945	18497	21133	19730	16518	20556	20627	16515	Organismal Systems; Endocrine System; PPAR signaling pathway
Pancreatic cancer	0	0	0	0	0	0	0	0	0	0	0	0	0	0	0	0	0	0	0	0	0	0	0	0	0	0	0	0	0	0	0	0	Human Diseases; Cancers; Pancreatic cancer
Pancreatic secretion	0	0	0	0	0	0	0	0	0	0	0	0	0	0	0	0	0	0	0	0	0	0	0	0	0	0	0	0	0	0	0	0	Organismal Systems; Digestive System; Pancreatic secretion
Pantothenate and CoA biosynthesis	118748	131643	95013	81355	126268	129898	120984	108884	97933	135049	120009	123181	89375	95271	68309	106695	87544	82576	87660	96488	145456	121947	112632	135299	137200	132089	162858	150356	105098	144260	159936	111465	Metabolism; Metabolism of Cofactors and Vitamins; Pantothenate and CoA biosynthesis
Parkinson's disease	246	527	1446	533	814	687	302	912	218	221	196	237	262	213	386	153	218	346	166	146	608	355	349	328	536	292	652	420	686	881	676	410	Human Diseases; Neurodegenerative Diseases; Parkinson's disease
Pathogenic Escherichia coli infection	0	0	0	0	0	0	0	0	0	0	0	0	0	0	0	0	0	0	0	0	0	0	0	0	0	0	0	0	1	0	0	1	Human Diseases; Infectious Diseases; Pathogenic Escherichia coli infection
Pathways in cancer	8476	9353	8048	6799	9216	9477	8793	7888	7345	9314	8264	8999	6989	7493	7267	8144	7678	7649	7002	7928	10456	9105	8434	9346	9976	9060	11389	10227	7763	10371	11277	8280	Human Diseases; Cancers; Pathways in cancer
Penicillin and cephalosporin biosynthesis	2388	2081	2425	2299	2187	2056	1938	2823	3006	2007	2898	3456	2711	3820	2476	3569	4855	5281	3502	2728	1785	2678	2285	1981	1926	4409	1662	1313	2507	1964	1325	1849	Metabolism; Biosynthesis of Other Secondary Metabolites; Penicillin and cephalosporin biosynthesis
Pentose and glucuronate interconversions	94138	106063	70628	67966	102093	108130	95134	84811	75034	109419	98881	109085	68061	72741	63875	86968	69090	65103	63665	78041	117547	92092	106117	117127	111667	109893	130418	119655	86206	116004	128346	94085	Metabolism; Carbohydrate Metabolism; Pentose and glucuronate interconversions
Pentose phosphate pathway	149539	166877	118064	111348	158355	168418	152862	133608	118086	169915	151403	163515	115304	119875	97882	136971	110536	105193	99104	125048	183058	144247	158418	176212	173384	167032	203513	188597	130372	183759	201073	145948	Metabolism; Carbohydrate Metabolism; Pentose phosphate pathway
Peptidases	343561	370759	279477	258859	357350	373722	344870	305413	282911	383625	340168	347721	266697	273289	211690	297031	244475	231275	253472	285004	401555	347474	330218	387714	383977	358782	449644	415022	302710	401088	437552	323928	Metabolism; Enzyme Families; Peptidases
Peptidoglycan biosynthesis	141909	153409	118152	108296	147947	152733	144951	130696	120662	158851	145504	151001	116169	120176	90879	132897	104351	99805	107803	119642	169106	143253	136811	158655	161091	162013	184072	170804	127345	166424	182835	133660	Metabolism; Glycan Biosynthesis and Metabolism; Peptidoglycan biosynthesis
Peroxisome	30637	31889	27284	24605	31699	33125	29708	28362	27697	32223	29071	29413	25541	24763	22934	26596	23673	23739	28236	26361	32309	30018	27671	32816	31890	29254	35759	32098	28814	33271	33660	27740	Cellular Processes; Transport and Catabolism; Peroxisome
Pertussis	1647	1750	2004	1693	2119	1937	1572	1943	2081	1494	1642	2324	1580	2199	2788	1718	2917	2500	3508	2566	1357	2149	2040	1774	1512	1595	1452	1103	2291	1334	967	2808	Human Diseases; Infectious Diseases; Pertussis
Phagosome	0	0	0	0	0	0	0	0	0	0	0	0	0	0	0	0	0	0	0	0	0	0	0	0	0	0	0	0	0	0	0	0	Cellular Processes; Transport and Catabolism; Phagosome
Phenylalanine metabolism	29545	31908	25211	24558	31081	32867	29723	28518	25811	32757	29991	31575	25563	26139	20650	30294	27517	27236	23715	26743	34941	28851	29973	32749	33646	30775	36957	33960	27648	34812	36732	28433	Metabolism; Amino Acid Metabolism; Phenylalanine metabolism
Phenylalanine, tyrosine and tryptophan biosynthesis	157431	175695	129853	109385	169379	176258	157900	145797	130904	178875	161030	167649	121491	126503	97318	141265	111290	105217	119017	130568	193456	164716	153411	181361	184865	174917	215476	196768	139823	192440	210332	146686	Metabolism; Amino Acid Metabolism; Phenylalanine, tyrosine and tryptophan biosynthesis
Phenylpropanoid biosynthesis	23349	26560	20570	20137	27661	28537	23361	23427	23165	26937	29707	28535	20504	24448	19687	27552	20715	19297	21368	24554	30799	27606	28534	27668	30499	31335	29334	28461	24988	27370	29960	22090	Metabolism; Biosynthesis of Other Secondary Metabolites; Phenylpropanoid biosynthesis
Phosphatidylinositol signaling system	18732	20606	14819	13210	19634	21141	18928	16116	14083	21281	17550	16695	12812	13761	8143	14008	13691	12721	12022	14337	21891	18927	16496	20996	20328	17482	26132	24281	15489	22580	25140	17750	Environmental Information Processing; Signal Transduction; Phosphatidylinositol signaling system
Phosphonate and phosphinate metabolism	8988	9616	7690	7859	9892	9921	9537	9307	8690	11134	11161	9399	7926	6718	6196	8990	7679	7876	6977	7579	11364	8859	9022	10989	11209	9834	11279	9979	9915	10194	10953	8825	Metabolism; Metabolism of Other Amino Acids; Phosphonate and phosphinate metabolism
Phosphotransferase system (PTS)	105924	123461	62248	61092	107160	121188	107834	70958	56920	126769	83368	96731	62839	66756	54814	56208	47200	38892	42707	77000	123081	99485	117083	133767	112874	92158	166939	157040	71841	137545	155991	120145	Environmental Information Processing; Membrane Transport; Phosphotransferase system (PTS)
Photosynthesis	61308	66284	54971	48958	65672	66598	62295	56067	53553	66198	63835	72686	52802	53474	40967	63778	45298	43808	47618	53406	75198	63824	56165	66378	72764	87260	75961	69145	56789	70760	76048	56570	Metabolism; Energy Metabolism; Photosynthesis
Photosynthesis - antenna proteins	0	0	0	0	0	0	0	0	0	0	0	0	0	0	0	0	0	0	0	0	0	0	0	0	0	0	0	0	0	0	0	0	Metabolism; Energy Metabolism; Photosynthesis - antenna proteins
Photosynthesis proteins	61991	66925	55557	49973	66319	67373	62851	56794	54257	67050	64713	73169	53562	53849	41182	64274	45521	43967	47976	53823	75887	64203	56715	67077	73539	87864	76447	69743	57638	71422	76450	57027	Metabolism; Energy Metabolism; Photosynthesis proteins
Phototransduction	0	0	0	0	0	0	0	0	0	0	0	0	0	0	0	0	0	0	0	0	0	0	0	0	0	0	0	0	0	0	0	0	Organismal Systems; Sensory System; Phototransduction
Phototransduction - fly	0	0	0	0	0	0	0	0	0	0	0	0	0	0	0	0	0	0	0	0	0	0	0	0	0	0	0	0	0	0	0	0	Organismal Systems; Sensory System; Phototransduction - fly
Plant-pathogen interaction	25809	28999	21648	19693	28468	29417	26178	24764	21678	29532	26952	27357	21552	21430	18604	24303	19395	18453	18409	22522	32679	26117	26540	30045	31042	27839	34430	32309	23833	31846	35068	24667	Organismal Systems; Environmental Adaptation; Plant-pathogen interaction
Polycyclic aromatic hydrocarbon degradation	18289	19504	16345	14804	19213	19290	19074	15825	14778	19672	17396	18527	14266	14926	10808	17609	13991	13809	12951	15243	22548	17917	15525	19118	21264	20975	23445	21304	16717	21140	23416	17123	Metabolism; Xenobiotics Biodegradation and Metabolism; Polycyclic aromatic hydrocarbon degradation
Polyketide sugar unit biosynthesis	34245	36130	28290	27074	35502	36811	33882	31284	30609	37927	35435	38795	27455	33163	25159	33126	26752	26515	28813	30156	37963	35109	31618	37800	37086	45487	42172	37604	30819	37266	39744	32574	Metabolism; Metabolism of Terpenoids and Polyketides; Polyketide sugar unit biosynthesis
Pores ion channels	43465	42999	41562	38102	44371	44364	38786	39165	37642	39639	39472	42604	32117	43879	42391	38803	49921	50406	44131	42663	42710	46062	41923	41798	42715	41149	46143	40912	40805	44406	41411	40649	Unclassified; Cellular Processes and Signaling; Pores ion channels
Porphyrin and chlorophyll metabolism	159732	185442	117583	103677	172652	191219	166861	152289	125636	193421	179656	181372	122786	125658	89858	144398	110985	100099	99164	125954	196384	162888	183935	199293	185843	205277	229876	227357	138206	209904	228319	158158	Metabolism; Metabolism of Cofactors and Vitamins; Porphyrin and chlorophyll metabolism
Prenyltransferases	53459	56700	46657	41476	54913	56272	53707	47922	45317	56241	50396	53402	41818	46732	37029	48736	45704	45270	43667	46486	60414	54756	48617	56677	57834	53940	66876	60698	47037	60877	65185	49874	Metabolism; Metabolism of Terpenoids and Polyketides; Prenyltransferases
Primary bile acid biosynthesis	3492	3839	3601	4066	4160	3841	3686	2946	3458	3326	3924	5293	3258	4894	4394	4898	3963	4068	3590	4210	4823	3657	3922	3766	4791	5970	3836	2904	3692	3572	3785	3761	Metabolism; Lipid Metabolism; Primary bile acid biosynthesis
Primary immunodeficiency	11711	12778	8327	7249	11878	12885	11409	8717	7465	13015	9795	10596	6191	7248	6306	7636	5014	4194	6289	8697	13856	11078	10869	13679	12965	9638	17119	15054	8935	14105	16063	10995	Human Diseases; Immune System Diseases; Primary immunodeficiency
Prion diseases	736	924	738	1118	860	1147	663	651	674	818	790	1137	750	359	1261	551	374	307	479	734	660	379	1453	1297	798	599	734	598	757	930	647	940	Human Diseases; Neurodegenerative Diseases; Prion diseases
Progesterone-mediated oocyte maturation	7860	8737	6687	5400	8437	8590	7884	7032	6469	8692	7644	8424	5816	6792	6634	7391	6230	5989	6324	7117	9736	8258	7881	8870	9182	8497	10905	9798	6935	9543	10740	7346	Organismal Systems; Endocrine System; Progesterone-mediated oocyte maturation
Propanoate metabolism	97941	107739	80292	74719	102758	112381	102030	89280	79977	113003	97033	95784	79734	73996	51337	84817	70275	66653	66542	76786	116724	94743	93201	110772	110975	100734	129298	122570	86938	119982	127879	92513	Metabolism; Carbohydrate Metabolism; Propanoate metabolism
Prostate cancer	7886	8749	6702	5420	8464	8622	7895	7051	6499	8707	7669	8485	5825	6847	6827	7439	6431	6244	6461	7206	9747	8283	7999	8888	9195	8601	10960	9827	6961	9556	10771	7455	Human Diseases; Cancers; Prostate cancer
Proteasome	7918	8811	6845	5506	8483	8676	7943	7132	6549	8772	7804	8636	6054	7099	6655	7679	6290	6101	6364	7195	9779	8280	7908	8894	9282	8672	10915	9844	7037	9610	10858	7388	Genetic Information Processing; Folding, Sorting and Degradation; Proteasome
Protein digestion and absorption	2425	1742	2394	2338	1903	1709	1590	1692	2086	1250	1544	2084	1214	2700	4290	2172	2727	2849	3071	3010	1415	2549	2179	1582	1570	1759	1629	1146	1919	1367	1088	1739	Organismal Systems; Digestive System; Protein digestion and absorption
Protein export	109571	119806	93158	80803	115637	121057	110127	99364	91013	121140	106532	109730	84917	90197	69935	94542	77258	73676	83167	91617	127452	111496	103011	123076	122174	110842	143927	132064	97904	129411	139802	103941	Genetic Information Processing; Folding, Sorting and Degradation; Protein export
Protein folding and associated processing	112690	120235	96814	89884	117296	124271	109399	106172	93613	124314	114947	119106	92045	96278	75600	103369	92860	91389	84033	94439	125228	107072	107971	125347	121062	131045	140087	129250	103451	130589	134064	104275	Unclassified; Genetic Information Processing; Protein folding and associated processing
Protein kinases	43596	47385	35685	37221	46488	48381	44071	45304	41068	51683	52749	53169	41975	36762	27014	47044	35664	34059	31623	35832	54355	41485	46383	51666	52988	61631	53442	51137	44072	51973	54416	41731	Metabolism; Enzyme Families; Protein kinases
Protein processing in endoplasmic reticulum	11116	11864	10210	8621	11651	11993	10775	10523	10031	11345	10921	12059	9331	11101	10949	11764	11404	11287	10434	10955	12171	11558	11088	11550	11838	11627	13247	12209	10370	12616	13091	9832	Genetic Information Processing; Folding, Sorting and Degradation; Protein processing in endoplasmic reticulum
Proximal tubule bicarbonate reclamation	2547	3030	3255	2369	3054	2454	3380	2412	3069	2484	2346	3137	2363	3165	2886	3691	6200	6300	3960	3150	3787	3366	2855	2461	3686	2600	3236	2933	3223	3177	3416	2573	Organismal Systems; Excretory System; Proximal tubule bicarbonate reclamation
Purine metabolism	369859	398103	311203	289201	383398	399022	372972	333842	308863	402764	366146	388699	295451	309967	256414	332378	283743	272853	281958	314048	421059	368636	362899	413704	404932	409377	467480	434802	329623	426637	456279	357324	Metabolism; Nucleotide Metabolism; Purine metabolism
Pyrimidine metabolism	319006	344327	274197	248377	332513	344048	322614	287667	269263	345797	310954	327893	255594	263688	216129	282697	230532	220165	247256	270107	367942	318915	306648	355373	354532	333125	404224	373474	285946	368636	395520	302304	Metabolism; Nucleotide Metabolism; Pyrimidine metabolism
Pyruvate metabolism	193095	213715	155045	143084	202752	215095	200437	173845	158475	222265	193879	198536	148157	151861	114247	172888	143974	137387	135608	157206	234195	189855	186772	221823	221258	211271	261969	243094	169447	233597	257259	185386	Metabolism; Carbohydrate Metabolism; Pyruvate metabolism
RIG-I-like receptor signaling pathway	226	89	122	453	76	58	190	71	144	117	64	61	134	91	276	148	120	169	24	112	33	36	46	116	57	103	5	22	150	23	18	399	Organismal Systems; Immune System; RIG-I-like receptor signaling pathway
RNA degradation	75242	82095	67232	58589	80549	82691	75600	69631	65032	80344	73946	80195	60522	66249	58859	69625	65828	65061	63369	67331	87061	79209	75077	83935	84439	81572	94784	87213	69529	87992	92467	72833	Genetic Information Processing; Folding, Sorting and Degradation; RNA degradation
RNA polymerase	26089	27948	22306	20498	26876	28217	26297	24540	22562	28499	26602	27365	22552	22522	17757	23334	20282	19726	20264	22122	28306	25772	25933	29502	27412	28995	31922	30537	23732	29905	31197	25658	Genetic Information Processing; Transcription; RNA polymerase
RNA transport	28477	31851	21661	20897	29994	32363	29464	25583	22698	33530	30064	30861	22732	22086	14815	25587	17775	15807	18649	22273	35242	27530	27836	33168	33232	33929	39185	36975	24384	34786	39067	26784	Genetic Information Processing; Translation; RNA transport
Regulation of actin cytoskeleton	0	0	0	0	0	0	0	0	0	0	0	0	0	0	0	0	0	0	0	0	0	0	0	0	0	0	0	0	0	0	0	0	Cellular Processes; Cell Motility; Regulation of actin cytoskeleton
Renal cell carcinoma	612	614	1359	1273	776	864	906	802	841	583	616	571	1157	693	628	744	1412	1608	668	802	705	817	463	464	788	556	466	419	821	811	485	923	Human Diseases; Cancers; Renal cell carcinoma
Renin-angiotensin system	38	22	22	65	17	56	29	46	55	51	35	62	21	59	2	167	45	69	23	51	5	28	67	13	4	52	9	8	71	7	7	20	Organismal Systems; Endocrine System; Renin-angiotensin system
Replication, recombination and repair proteins	130897	145394	110905	98665	139195	144860	137710	125736	110525	148678	135690	147498	115814	110179	91048	123159	114450	111556	99747	109474	157598	131491	135554	153462	149253	155843	173548	162127	118092	162244	174576	136721	Unclassified; Genetic Information Processing; Replication, recombination and repair proteins
Restriction enzyme	36705	36350	34165	27150	36701	35454	35227	33961	28999	36678	33460	31582	29044	30250	19001	30086	23736	22668	26262	28766	41092	36109	27959	35869	38932	31740	43812	39764	32758	40660	43532	31853	Unclassified; Genetic Information Processing; Restriction enzyme
Retinol metabolism	2353	2177	2475	3219	2145	2444	2658	1994	2032	2470	2206	2247	2313	2307	558	2736	2987	3153	1309	2095	2943	1446	1608	1917	2817	2192	2113	1847	2087	2410	2215	1402	Metabolism; Metabolism of Cofactors and Vitamins; Retinol metabolism
Rheumatoid arthritis	0	0	0	0	0	0	0	0	0	0	0	0	0	0	0	0	0	0	0	0	0	0	0	0	0	0	0	0	0	0	0	0	Human Diseases; Immune System Diseases; Rheumatoid arthritis
Riboflavin metabolism	30877	32147	29765	25248	32770	33026	30135	30821	27609	31919	32058	33080	27088	29057	23585	29838	30474	30843	28163	28236	32433	33511	28443	31858	31582	37943	35186	32872	29202	33725	33877	29732	Metabolism; Metabolism of Cofactors and Vitamins; Riboflavin metabolism
Ribosome	411904	443098	358783	318625	428111	441850	414933	371822	347599	443142	397098	423696	332745	348815	271012	373634	300337	288577	319615	349949	476781	409840	380906	450830	457416	437280	519971	478208	367295	474658	511903	383631	Genetic Information Processing; Translation; Ribosome
Ribosome Biogenesis	234770	255356	200172	182618	247047	255928	238914	215337	200299	259661	235948	247539	195120	196058	149910	215537	175615	167764	182919	198642	278503	237611	223636	261529	266823	260860	300991	279212	211103	274660	298604	223151	Genetic Information Processing; Translation; Ribosome Biogenesis
Ribosome biogenesis in eukaryotes	8417	9114	7237	6378	8749	9094	8512	7474	6942	9157	8052	8546	6660	6969	5273	7589	6010	5747	6353	7072	9995	8423	7711	9209	9532	8704	10910	10005	7409	9833	10810	7850	Genetic Information Processing; Translation; Ribosome biogenesis in eukaryotes
Salivary secretion	0	0	0	0	0	0	0	0	0	0	0	0	0	0	0	0	0	0	0	0	0	0	0	0	0	0	0	0	0	0	0	0	Organismal Systems; Digestive System; Salivary secretion
Secondary bile acid biosynthesis	3383	3754	3529	3924	4061	3675	3591	2852	3370	3207	3832	5258	3100	4871	4377	4875	3908	4006	3528	4167	4752	3617	3824	3669	4698	5946	3799	2850	3583	3456	3752	3705	Metabolism; Lipid Metabolism; Secondary bile acid biosynthesis
Secretion system	181594	201256	170440	149442	202165	205038	190663	191125	167718	210419	193956	192691	178143	150764	109317	179360	155612	154860	145817	153021	233123	179589	169817	207474	222771	198275	233633	213743	180983	225811	239066	176395	Environmental Information Processing; Membrane Transport; Secretion system
Selenocompound metabolism	62131	67970	50329	47295	65961	69854	62072	56199	50479	69833	61943	62209	49061	50355	39655	52806	49970	47283	45224	52341	71796	64084	61405	70485	68468	67646	80544	77630	55883	73238	79194	60432	Metabolism; Metabolism of Other Amino Acids; Selenocompound metabolism
Sesquiterpenoid biosynthesis	0	0	0	0	0	0	0	0	0	0	0	0	0	0	0	0	0	0	0	0	0	0	0	0	0	0	0	0	0	0	0	0	Metabolism; Metabolism of Terpenoids and Polyketides; Sesquiterpenoid biosynthesis
Shigellosis	0	0	0	0	0	0	0	0	0	0	2	0	0	0	0	0	0	0	0	0	0	0	0	0	0	0	0	0	2	0	0	2	Human Diseases; Infectious Diseases; Shigellosis
Signal transduction mechanisms	87126	96745	65319	61224	91657	97600	91232	79075	69811	103427	90485	91531	69480	67073	50514	75617	66515	63037	58973	69856	108369	88274	87690	103312	101679	98554	122172	115287	74832	108163	121492	86582	Unclassified; Cellular Processes and Signaling; Signal transduction mechanisms
Small cell lung cancer	4	2	2	126	3	23	3	54	35	39	4	4	16	8	5	9	36	52	10	9	15	30	90	12	6	7	18	10	7	17	52	11	Human Diseases; Cancers; Small cell lung cancer
Sphingolipid metabolism	41965	43417	33919	35199	43331	44186	39225	35530	35983	44157	42396	44056	29133	33163	37239	37755	37028	37067	33860	37793	46481	40107	43771	48054	46080	44179	50225	43917	38564	44633	46248	38599	Metabolism; Lipid Metabolism; Sphingolipid metabolism
Spliceosome	0	0	0	0	0	0	0	0	0	0	0	0	0	0	0	0	0	0	0	0	0	0	0	0	0	0	0	0	0	0	0	0	Genetic Information Processing; Transcription; Spliceosome
Sporulation	159456	188921	112100	97688	175642	190830	171694	152722	129256	205881	180384	176503	129820	109893	69134	141662	83559	71216	94912	119059	220841	166089	171871	205467	205247	192870	247020	236490	136643	216935	253951	153416	Unclassified; Cellular Processes and Signaling; Sporulation
Staphylococcus aureus infection	1117	674	1022	2472	574	399	1937	365	737	783	432	715	1073	942	1489	659	679	887	237	727	454	254	688	779	347	827	337	373	818	349	249	2320	Human Diseases; Infectious Diseases; Staphylococcus aureus infection
Starch and sucrose metabolism	195045	213919	146493	141065	205002	215054	197547	167914	155145	224671	201185	203789	141341	152784	115242	176853	130186	121181	131440	159682	245422	198541	189809	223759	231242	222862	269039	247613	166248	233085	267439	183676	Metabolism; Carbohydrate Metabolism; Starch and sucrose metabolism
Steroid biosynthesis	218	223	162	220	263	342	195	186	179	203	191	70	319	75	39	95	2731	3118	219	111	211	278	124	195	218	59	124	130	216	436	80	113	Metabolism; Lipid Metabolism; Steroid biosynthesis
Steroid hormone biosynthesis	1405	960	1019	1725	1031	1104	720	1183	1177	1048	1910	1871	945	3556	4334	2743	7011	7954	1494	2612	966	1140	2687	1121	990	1964	942	787	1241	1202	791	1149	Metabolism; Lipid Metabolism; Steroid hormone biosynthesis
Stilbenoid, diarylheptanoid and gingerol biosynthesis	219	110	160	617	112	93	179	93	131	132	78	173	405	793	288	150	228	302	75	328	30	97	194	129	26	133	33	34	123	98	47	447	Metabolism; Biosynthesis of Other Secondary Metabolites; Stilbenoid, diarylheptanoid and gingerol biosynthesis
Streptomycin biosynthesis	57129	60417	46236	44858	59012	61324	56805	51256	49505	63521	57503	59106	44607	50888	36331	51548	44365	43478	45403	47862	65068	57971	51320	62431	62768	66643	71923	65086	50534	63269	68731	53320	Metabolism; Biosynthesis of Other Secondary Metabolites; Streptomycin biosynthesis
Styrene degradation	8577	9918	5493	4624	8842	10549	8761	6523	4995	10785	7336	6121	4075	4312	1638	4968	5478	4976	3352	5397	10186	8408	7284	10068	9104	7223	13859	13326	5858	11410	13013	7712	Metabolism; Xenobiotics Biodegradation and Metabolism; Styrene degradation
Sulfur metabolism	40154	43910	32278	30469	43150	44429	40625	37106	33227	45631	41641	42341	31461	33505	29809	38126	41175	41809	31332	35330	48810	42149	39880	45295	45979	46652	53282	49442	36721	47902	52665	40086	Metabolism; Energy Metabolism; Sulfur metabolism
Sulfur relay system	48667	56242	37839	31496	53004	57336	51067	44376	36098	58090	49364	51447	36025	36155	27796	43058	38373	37245	31254	38257	60999	49884	48559	58194	56393	55229	71578	66919	40910	64043	70992	49316	Genetic Information Processing; Folding, Sorting and Degradation; Sulfur relay system
Synthesis and degradation of ketone bodies	7507	8287	6985	6531	8180	9704	8109	6716	5537	8579	6545	5087	6634	4555	2748	5123	5967	5656	4220	5407	8028	6623	7139	8093	7605	4678	9227	9948	7025	9772	9214	7256	Metabolism; Lipid Metabolism; Synthesis and degradation of ketone bodies
Systemic lupus erythematosus	2	24	6	12	27	17	2	12	1	1	20	0	1	14	2	18	900	1028	33	9	25	67	3	1	12	51	19	11	0	72	8	4	Human Diseases; Immune System Diseases; Systemic lupus erythematosus
TGF-beta signaling pathway	0	0	0	0	0	0	0	0	0	0	0	0	0	0	0	0	0	0	0	0	0	0	0	0	0	0	0	0	0	0	0	0	Environmental Information Processing; Signal Transduction; TGF-beta signaling pathway
Taurine and hypotaurine metabolism	19156	20793	18337	16918	20700	21798	19182	17807	16487	20211	18247	19076	15710	17004	15456	17174	17687	17326	15692	17835	20864	19111	18978	20852	20179	19303	23219	21606	17880	21607	22120	18732	Metabolism; Metabolism of Other Amino Acids; Taurine and hypotaurine metabolism
Terpenoid backbone biosynthesis	99283	107662	84713	74511	103702	107079	101307	89693	82803	108362	96142	100684	79118	82105	63873	88082	74595	72109	75951	84223	115241	100802	94428	110255	110063	101655	128516	118134	87767	117090	125951	94435	Metabolism; Metabolism of Terpenoids and Polyketides; Terpenoid backbone biosynthesis
Tetracycline biosynthesis	26164	30759	22181	18162	28587	30098	29784	23133	19730	31387	26598	30872	17612	20272	14823	25490	19556	18421	16230	20231	35837	25671	26983	31663	32882	35440	40418	36827	22645	35391	40295	26698	Metabolism; Metabolism of Terpenoids and Polyketides; Tetracycline biosynthesis
Thiamine metabolism	88078	97989	72359	63558	94377	98264	90908	81932	74286	101544	91643	92622	71868	71495	57037	79983	64173	61507	66762	74180	106419	91442	85646	101771	101130	97749	119064	110086	78522	105749	116918	85547	Metabolism; Metabolism of Cofactors and Vitamins; Thiamine metabolism
Tight junction	0	0	0	0	0	0	0	0	0	0	0	0	0	0	0	0	0	0	0	0	0	0	0	0	0	0	0	0	0	0	0	0	Cellular Processes; Cell Communication; Tight junction
Toluene degradation	16475	17728	15996	12681	16923	17866	15611	13569	12147	15900	13363	15676	10290	14047	14978	12489	16231	15608	14793	13716	16302	17936	15568	17496	15798	15314	20353	18545	14235	18896	18582	17252	Metabolism; Xenobiotics Biodegradation and Metabolism; Toluene degradation
Toxoplasmosis	4	2	2	126	3	23	3	54	35	39	4	4	16	8	5	9	36	52	10	9	15	30	90	12	6	7	18	10	7	17	52	11	Human Diseases; Infectious Diseases; Toxoplasmosis
Transcription factors	309204	349118	225243	222815	325802	353493	321541	280215	243562	373068	328411	333850	242283	232766	171403	273508	210279	190491	190198	244824	386417	302506	333617	377375	363492	361034	435226	418511	267457	389476	435177	307365	Genetic Information Processing; Transcription; Transcription factors
Transcription machinery	181461	200167	147769	130509	191377	199928	186574	170135	155603	206599	189628	191635	147061	150297	117921	167770	157937	152197	143551	153076	222435	191336	189009	208556	212001	202077	244822	234062	164471	222465	244751	171968	Genetic Information Processing; Transcription; Transcription machinery
Transcription related proteins	1013	973	674	1060	722	690	933	402	301	460	264	1148	413	268	1433	234	1467	1426	583	712	589	819	1332	1132	644	443	792	590	555	1040	684	1719	Unclassified; Genetic Information Processing; Transcription related proteins
Translation factors	95282	102275	81311	73032	98981	102395	95345	86023	80385	102924	92534	96794	76046	80292	63243	84230	71307	68381	74553	80711	108569	95505	89479	105039	104416	99010	120143	110914	84831	109488	117233	89366	Genetic Information Processing; Translation; Translation factors
Translation proteins	165458	180638	136401	123365	174122	181315	167264	149908	136227	185529	162567	166548	128447	131390	100161	143305	121826	114663	122399	137018	196129	166431	158129	187549	186321	168195	218666	203331	147394	196666	215669	156503	Unclassified; Genetic Information Processing; Translation proteins
Transporters	1114885	1240578	860277	903398	1178212	1276449	1145808	1053228	949916	1349807	1254044	1256735	957423	880697	617146	1076527	737344	678346	691248	892461	1386097	1043156	1184076	1345916	1330169	1420957	1474117	1416918	1032793	1356577	1481290	1061316	Environmental Information Processing; Membrane Transport; Transporters
Tropane, piperidine and pyridine alkaloid biosynthesis	18077	19576	15257	13962	18929	19635	18350	17149	15687	19952	18603	19144	15077	16695	13174	18165	16408	16332	15665	16666	21365	19082	18441	19977	20572	19155	23004	21552	16832	21133	22844	17377	Metabolism; Biosynthesis of Other Secondary Metabolites; Tropane, piperidine and pyridine alkaloid biosynthesis
Tryptophan metabolism	24927	26665	24015	24206	26794	30587	25015	24600	23698	27473	24680	24376	24452	20644	13029	24063	24077	24161	21603	20864	25599	23241	23538	26379	25828	25274	26435	25784	25819	28540	25167	22432	Metabolism; Amino Acid Metabolism; Tryptophan metabolism
Tuberculosis	25967	28195	21907	19819	27185	27918	26430	22888	21601	28286	25103	26330	20727	21461	17768	23680	22366	21967	20318	22394	31374	27294	24577	28348	29992	26818	33627	31222	22984	30750	33594	24311	Human Diseases; Infectious Diseases; Tuberculosis
Two-component system	200865	222870	181263	176093	228118	237724	208038	221121	194510	236640	235181	222099	207544	171075	126354	205257	192674	189889	167655	173712	253299	209363	207802	233703	248038	240903	242436	238584	211107	244827	251253	196844	Environmental Information Processing; Signal Transduction; Two-component system
Type I diabetes mellitus	9524	10374	8697	7476	10185	10129	9709	8484	8466	10105	8991	9815	7507	8794	7372	8860	7520	7262	8579	8703	11011	9806	8874	10351	10698	9533	11996	10528	8889	10692	11465	9059	Human Diseases; Metabolic Diseases; Type I diabetes mellitus
Type II diabetes mellitus	8314	8956	6812	6445	8549	9001	8422	7184	6886	9139	7948	8424	6503	6737	5171	7390	6085	5756	6325	7050	9805	8271	7695	9082	9351	8673	10743	9898	7103	9552	10640	7723	Human Diseases; Metabolic Diseases; Type II diabetes mellitus
Tyrosine metabolism	58085	62047	48395	47763	59426	61950	61093	50490	46615	64474	55237	57089	44916	44551	35197	52429	46729	45627	41090	47469	68604	55062	52875	63259	64533	60297	74956	69408	51200	67245	74417	57003	Metabolism; Amino Acid Metabolism; Tyrosine metabolism
Ubiquinone and other terpenoid-quinone biosynthesis	27666	26678	26098	25085	27221	27728	24586	22754	22484	23677	20224	22845	19374	23562	27628	20590	32262	33577	26735	25471	24066	27802	23471	26199	24436	17686	27400	23162	24337	27024	23826	26184	Metabolism; Metabolism of Cofactors and Vitamins; Ubiquinone and other terpenoid-quinone biosynthesis
Ubiquitin system	632	330	541	681	269	237	350	277	293	217	319	616	269	740	1903	817	1689	1947	574	831	281	606	694	265	224	576	308	252	347	407	327	482	Genetic Information Processing; Folding, Sorting and Degradation; Ubiquitin system
VEGF signaling pathway	0	0	0	0	0	0	0	0	0	0	0	0	0	0	0	0	0	0	0	0	0	0	0	0	0	0	0	0	0	0	0	0	Environmental Information Processing; Signal Transduction; VEGF signaling pathway
Valine, leucine and isoleucine biosynthesis	135161	151497	106734	95625	144016	150709	139568	125334	114702	158242	143412	148483	103522	114049	78464	131255	104144	98689	98137	111458	169991	136659	132327	156940	160978	164207	186585	173274	122307	165360	184569	125313	Metabolism; Amino Acid Metabolism; Valine, leucine and isoleucine biosynthesis
Valine, leucine and isoleucine degradation	29764	30590	30113	33445	31623	36141	29477	29961	30060	30697	30479	28873	31751	27486	22375	29937	34226	34626	28842	27420	28907	28145	31323	29601	30472	28321	26252	28208	33399	32258	25619	27275	Metabolism; Amino Acid Metabolism; Valine, leucine and isoleucine degradation
Various types of N-glycan biosynthesis	52	107	72	73	62	113	51	100	67	75	138	192	80	197	12	277	13	4	26	25	36	17	11	27	49	180	32	44	106	74	93	43	Metabolism; Glycan Biosynthesis and Metabolism; Various types of N-glycan biosynthesis
Vascular smooth muscle contraction	0	0	0	0	0	0	0	0	0	0	0	0	0	0	0	0	0	0	0	0	0	0	0	0	0	0	0	0	0	0	0	0	Organismal Systems; Circulatory System; Vascular smooth muscle contraction
Vasopressin-regulated water reabsorption	0	0	0	2	0	1	0	0	0	2	0	0	0	0	0	0	2	2	0	0	0	0	2	0	0	0	0	0	0	0	0	0	Organismal Systems; Excretory System; Vasopressin-regulated water reabsorption
Vibrio cholerae infection	0	0	0	13	0	8	0	1	0	5	0	0	0	0	0	0	5	9	0	0	1	0	14	0	0	0	1	0	0	1	1	1	Human Diseases; Infectious Diseases; Vibrio cholerae infection
Vibrio cholerae pathogenic cycle	14192	15776	11645	9686	15196	15985	14275	12238	10252	15602	12677	13540	9761	9708	10605	10176	9783	9342	9600	11527	16674	14383	14580	16799	15845	11811	19548	17733	11763	17778	18855	14495	Human Diseases; Infectious Diseases; Vibrio cholerae pathogenic cycle
Viral myocarditis	4	2	2	126	3	23	3	54	35	39	4	4	16	8	5	9	36	52	10	9	15	30	90	12	6	7	18	10	7	17	52	11	Human Diseases; Cardiovascular Diseases; Viral myocarditis
Vitamin B6 metabolism	38994	42397	30944	27110	40530	41537	38267	33502	30423	42616	35662	37468	26276	30036	24374	32168	26848	25118	28256	32030	46709	38611	36139	43648	44124	35197	52800	47322	33548	45973	51105	35779	Metabolism; Metabolism of Cofactors and Vitamins; Vitamin B6 metabolism
Wnt signaling pathway	0	0	0	0	0	0	0	0	0	0	0	0	0	0	0	0	0	0	0	0	0	0	0	0	0	0	0	0	0	0	0	0	Environmental Information Processing; Signal Transduction; Wnt signaling pathway
Xylene degradation	12682	13890	8379	8258	12520	13078	13759	11008	9440	15765	12527	13493	9175	7599	5037	11126	5029	4157	6422	8565	16560	10122	11316	15588	15013	14193	18848	16617	10738	15697	19074	12443	Metabolism; Xenobiotics Biodegradation and Metabolism; Xylene degradation
Zeatin biosynthesis	8860	9262	7426	6728	8927	9203	8688	7696	7158	9234	8377	8980	6517	7515	7097	8208	6770	6610	6732	7901	10157	8891	8397	9404	9662	9156	11210	10171	7507	10020	11025	8075	Metabolism; Metabolism of Terpenoids and Polyketides; Zeatin biosynthesis
alpha-Linolenic acid metabolism	784	877	1041	672	983	1113	707	945	661	658	769	737	750	504	337	775	958	703	677	675	830	762	1143	726	840	598	764	1008	1112	1188	797	841	Metabolism; Lipid Metabolism; alpha-Linolenic acid metabolism
beta-Alanine metabolism	36037	38765	30374	27535	37889	40326	35518	32371	30613	38737	34972	37575	28358	29812	23676	31852	28188	26381	30187	29962	39692	36543	34973	39147	38766	39650	43866	40833	33119	41539	41661	33493	Metabolism; Metabolism of Other Amino Acids; beta-Alanine metabolism
beta-Lactam resistance	2277	2313	2251	1935	2189	1984	1840	2292	2377	1737	3042	5091	1614	3625	3404	3817	3760	3880	2930	2557	1864	2576	3147	2368	2019	6906	2055	1497	2153	2113	1478	2207	Metabolism; Biosynthesis of Other Secondary Metabolites; beta-Lactam resistance
mRNA surveillance pathway	0	0	0	0	0	0	0	0	0	0	0	0	0	0	0	0	0	0	0	0	0	0	0	0	0	0	0	0	0	0	0	0	Genetic Information Processing; Translation; mRNA surveillance pathway
mTOR signaling pathway	0	0	0	0	0	0	0	0	0	0	0	0	0	0	0	0	0	0	0	0	0	0	0	0	0	0	0	0	0	0	0	0	Environmental Information Processing; Signal Transduction; mTOR signaling pathway
p53 signaling pathway	9	10	14	155	15	41	5	68	38	47	9	43	28	44	7	58	61	89	26	33	20	53	112	21	9	34	27	16	30	23	59	15	Cellular Processes; Cell Growth and Death; p53 signaling pathway
